# Supplementary material for: GPR19 Coordinates Multiple Molecular Aspects of Stress Responses Associated with the Aging Process
Source: MDPI journal article supplement (doi:10.3390/ijms24108499), 2023-05-09
Supplement: s1 [file s1]

## **Data Supplement**

### **GPR19 coordinates multiple molecular aspects of stress responses associated with the aging process**

Stuart Maudsley<sup>1\*</sup>, Claudia Schrauwen<sup>1</sup>, İrem Harputluoğlu<sup>1</sup>, Deborah Walter<sup>1</sup>, Hanne Leysen<sup>1</sup>, Patricia McDonald<sup>2</sup>

1. Receptor Biology Lab, Department of Biomedical Science, University of Antwerp.
2. H. Lee Moffitt Cancer Center, Tampa, FL, USA

\* Corresponding Author: Prof. Stuart Maudsley – [stuartmaudsley@uantwerpen.be](mailto:stuartmaudsley@uantwerpen.be):  
[receptorbiologylab@gmail.com](mailto:receptorbiologylab@gmail.com)

**Table S3. GPR19 induced protein expression alterations in the nucleus/organelle compartment (CE3).** Significantly-regulated proteins (identified by official Gene Symbols) found in cells, differential between mock-transfection and the specific GPR19 expression level (0.5, 1, 2, 5, 10µg), are represented as a log2-transformed and normalized expression ratio between the specific GPR19 expression level and the expression level found in cells receiving empty vector transfection.

| Gene Symbol | CE3 0.5  | CE3 1    | CE3 2    | CE3 5    | CE3 10   |
|-------------|----------|----------|----------|----------|----------|
| TUBB4A      |          | 8.242553 |          | 9.351084 | 9.720522 |
| GATC        | 4.763431 | 5.843191 | 5.230535 | 5.95175  | 5.139965 |
| MTHFD1L     | 5.03443  | 5.13742  | 5.644408 | 5.359593 | 5.318951 |
| CCDC47      | 6.64904  | 5.46689  | 2.513803 | 3.958372 | 4.654893 |
| LIMA1       | 3.630153 | 5.926437 | 4.433989 | 4.187908 | 4.322675 |
| MCM3        | 5.15333  | 5.730416 | 4.740339 | 4.30103  | 2.251686 |
| EIF5        | 4.252595 | 4.66208  | 4.334015 | 4.067817 | 4.837141 |
| RALA        | 2.673472 | 5.385117 | 3.319995 | 4.480454 | 5.551128 |
| CBR1        | 4.910196 | 4.824799 | 3.654328 | 3.62262  | 3.660259 |
| GDI2        | 4.133909 | 5.174894 | 3.27964  | 2.9253   | 5.060906 |
| SRPK1       | 3.509229 | 4.74124  | 3.938798 | 4.00468  | 4.173394 |
| ERLIN1      | 4.741597 | 3.575653 | 4.040991 | 4.015641 | 3.899485 |
| LTA4H       | 7.371242 |          | 5.524087 | 4.151017 | 3.152365 |
| HIST1H1B    | 5.153372 |          | 4.245155 | 6.479236 | 4.268037 |
| CBR3        | 4.652119 | 4.7428   | 3.038877 | 3.437425 | 3.440067 |
| ANXA6       | 3.739491 | 4.35529  | 3.968379 | 3.240796 | 3.430652 |
| FHOD1       | 3.254352 | 3.08163  | 3.575376 | 3.525703 | 4.761413 |
| RBM12       | 3.282013 | 3.917967 | 3.733188 | 3.135187 | 4.114262 |
| PPM1G       | 3.614445 | 3.266735 | 2.987266 | 3.633269 | 4.47674  |
| LYZ         | 4.050207 | 7.279965 | 2.903863 |          | 3.640887 |
| HNRNPUL1    | 3.309534 | 3.296412 | 4.089483 | 3.557651 | 3.60201  |
| TMED10      |          | 5.20399  | 5.339811 | 2.053773 | 5.199549 |
| BASP1       | 3.070783 | 4.488964 | 2.960233 | 2.693557 | 4.387876 |
| TPI1        | 4.536716 | 3.228897 | 3.653853 | 2.26586  | 3.692306 |
| APEX1       | 2.423478 | 3.811718 | 2.763255 | 3.836632 | 4.454563 |
| SRI         | 3.159661 | 3.461419 | 3.887171 | 3.301778 | 3.45776  |
| HMGB1P1     | 2.663372 | 4.085604 | 2.788801 | 3.244377 | 4.444233 |
| NANS        | 3.985236 | 4.016078 | 3.777602 | 1.69122  | 3.484526 |
| PIN4        | 3.67267  | 3.855606 | 2.676915 | 2.657228 | 4.092039 |
| ANP32C      | 2.171014 | 5.602177 | 2.783149 | 2.810144 | 3.047979 |
| TMCO1       | 3.686299 | 3.68318  | 3.757187 | 5.152776 |          |
| TIMM9       | 2.999216 | 5.312369 | 2.925118 |          | 5.002195 |
| GSTP1       | 3.802009 | 3.149388 | 3.483972 | 2.692793 | 3.048374 |
| NUDT5       | 4.856675 | 4.268794 | 3.339577 |          | 3.395648 |
| GARS        | 3.973393 |          | 3.990592 | 4.839776 | 3.031165 |
| SFXN1       | 3.357896 | 3.876133 | 2.544774 | 2.179812 | 3.869542 |
| CAND1       | 3.160578 | 3.135602 | 6.565578 | 2.742497 |          |

|           |          |          |          |          |          |
|-----------|----------|----------|----------|----------|----------|
| ANXA2     | 2.308101 | 3.659746 | 2.700853 | 2.887266 | 3.966553 |
| CBS       | 1.792039 |          |          | 6.011221 | 7.48202  |
| SNRPD1    | 2.776892 | 3.352057 | 2.792276 | 2.74869  | 3.319625 |
| TERF2     | 1.623507 | 4.378224 | 2.412714 | 3.111162 | 3.357781 |
| DENR      | 2.589578 | 3.110343 | 3.158672 | 2.206059 | 3.798974 |
| PDCD5     | 2.711168 | 3.370536 | 2.413948 | 2.796229 | 3.505163 |
| NOP10     | 2.060649 | 4.05616  | 1.938515 | 3.142824 | 3.405095 |
| KCTD12    | 1.901425 | 3.771931 | 2.719482 | 2.728295 | 3.420602 |
| FKBP8     | 4.383028 | 3.488797 | 4.267455 | 2.382108 |          |
| TOMM20    | 2.550239 | 3.245288 | 2.597236 | 2.452746 | 3.519299 |
| SLC25A13  | 3.23801  | 3.382695 | 2.205765 | 2.339206 | 3.181024 |
| IQGAP1    | 2.123156 | 3.953605 | 2.301094 | 5.605098 |          |
| CHORDC1   | 3.321023 | 3.302629 | 2.795494 | 2.221963 | 2.316037 |
| NSF       | 2.024865 | 4.62273  | 3.971449 |          | 3.331813 |
| NNT       | 4.259772 | 5.234429 | 4.391215 |          |          |
| EDF1      | 2.401201 | 3.337021 | 2.380935 | 2.264412 | 3.1695   |
| PRDX6     | 2.872932 | 4.016294 | 3.05323  |          | 3.566438 |
| RPS16     | 3.218792 | 3.35739  |          | 3.196021 | 3.648465 |
| NUCKS1    |          | 4.290982 | 2.29826  | 2.650762 | 3.97859  |
| PSMD7     | 1.545583 | 2.870938 |          | 5.040378 | 3.569159 |
| ILF3      | 2.052741 | 3.563401 | 2.248815 | 2.551532 | 2.465893 |
| AP1B1     | 2.388375 |          | 3.026677 | 3.517103 | 3.935037 |
| PEBP1     | 3.273944 | 3.194521 | 2.476725 |          | 3.862371 |
| NAP1L4    | 4.52622  |          | 3.119953 | 5.121954 |          |
| STMN2     | 2.481092 | 3.505233 |          | 2.732641 | 3.946908 |
| CDC37     | 3.770923 | 3.077037 | 2.712773 | 3.074254 |          |
| SUB1      | 2.300934 | 3.356013 | 3.479484 |          | 3.439905 |
| ADSL      | 2.517647 | 2.556399 | 2.701169 | 2.399824 | 2.316947 |
| RANBP1    | 4.90823  | 2.528558 |          | 1.937098 | 3.090749 |
| COX15     | 3.338216 |          | 2.732697 | 2.510183 | 3.813923 |
| SMARCE1   |          |          |          | 5.413995 | 6.936602 |
| MTA1      | 2.548527 |          |          | 4.226531 | 5.446669 |
| HPRT1     | 2.003431 | 3.622363 |          | 2.835459 | 3.756227 |
| PKN2      | 2.880802 |          | 3.065371 | 3.08492  | 3.176683 |
| UQCRFS1P1 | 2.627822 |          | 3.050946 | 2.397009 | 4.094705 |
| PABPC1    | 3.376748 | 3.159149 | 2.579701 | 2.9656   |          |
| ABCF2     | 5.811469 |          | 6.260582 |          |          |
| NIP7      | 2.100753 | 4.442407 |          | 2.195083 | 3.189934 |
| PSMB1     | 3.184728 | 3.152704 | 2.929735 | 2.612459 |          |
| DDX42     | 1.614998 | 3.018263 | 2.059933 | 2.264568 | 2.871579 |
| RBM26     | 2.15901  |          | 3.001943 | 3.444488 | 3.144235 |
| TPD52     | 2.30848  |          |          | 4.505419 | 4.80179  |
| CDKN2A    | 3.119843 | 3.60611  |          | 2.449068 | 2.404401 |
| DUT       | 2.43142  | 3.879403 |          | 1.67067  | 3.485811 |
| AKR1B1    | 3.419202 | 3.869911 |          |          | 4.167174 |

|          |          |          |          |          |          |
|----------|----------|----------|----------|----------|----------|
| UCHL1    | 2.431931 | 4.250201 |          |          | 4.773927 |
| CSDE1    | 4.636607 | 3.033983 | 3.770317 |          |          |
| ZYX      | 3.877549 |          |          | 3.453583 | 3.900944 |
| NUDC     | 2.978481 | 2.655575 | 3.02655  | 2.557965 |          |
| SKP1     | 2.783513 |          | 2.763657 | 3.245967 | 2.423788 |
| STARD13  | 2.630626 |          | 2.984814 | 3.636994 | 1.929293 |
| SDF4     | 2.490026 |          | 2.78236  | 3.415768 | 2.317722 |
| RAB6A    |          | 3.447894 |          | 2.750617 | 4.736682 |
| TDRKH    | 2.751986 |          | 2.527383 | 2.715188 | 2.820129 |
| GBAS     | 2.236065 |          |          | 2.268151 | 6.241393 |
| DSG1     |          | 5.979821 |          | 2.708999 | 2.045148 |
| RAB6B    |          | 3.447894 |          | 2.633126 | 4.602091 |
| NMT1     | 1.932869 | 4.575278 | 2.209692 | 1.927036 |          |
| FHL1     | 3.325759 | 3.400726 | 3.884692 |          |          |
| CRNKL1   | 3.096827 |          | 2.352975 | 3.093123 | 2.05168  |
| USP34    | 1.735766 | 3.563102 | 3.163682 | 2.11946  |          |
| GPS1     |          | 7.063828 | 3.512519 |          |          |
| NCBP1    | 2.839423 |          | 2.479855 | 2.659017 | 2.522733 |
| EXOC3L4  | 2.37739  |          | 3.484739 | 2.351166 | 2.213082 |
| MPHOSPH6 | 2.446221 |          | 2.333557 | 2.775983 | 2.753292 |
| RBM17    | 2.205135 |          | 2.812746 | 2.703947 | 2.584915 |
| P4HB     | 1.518037 | 3.485762 |          | 3.073572 | 2.195795 |
| ACTR2    | 2.33097  | 2.907762 | 3.106009 |          | 1.908381 |
| TIMM13   |          |          | 2.693907 | 3.364056 | 4.161816 |
| PFDN2    | 2.941764 | 2.868864 |          | 2.044244 | 2.33969  |
| TMCO1    |          |          |          | 3.699889 | 6.363362 |
| HMOX2    |          |          | 3.779731 | 4.239977 | 2.036748 |
| PDIA3    | 1.999607 |          | 2.751754 | 2.838457 | 2.446141 |
| FAM96B   | 2.238979 |          | 2.466421 | 2.812071 | 2.501653 |
| ACSL3    |          |          | 2.114419 | 4.521291 | 3.28862  |
| SCAF4    | 2.225364 |          | 2.292259 | 2.153716 | 3.239632 |
| SRSF7    | 1.578827 |          |          | 3.826176 | 4.460825 |
| ALCAM    | 1.761659 | 3.420197 | 2.247822 |          | 2.417631 |
| CALM1    | 2.243569 |          | 2.37897  | 2.954063 | 2.069066 |
| SAFB     | 2.388361 |          | 2.178701 | 2.131884 | 2.907055 |
| CAP1     | 2.493121 |          | 2.35188  | 2.716527 | 1.979327 |
| GART     | 3.024337 |          | 2.43422  | 2.121082 | 1.915489 |
| DYNLL1   | 2.417682 | 3.007906 | 2.003058 |          | 2.007872 |
| SSBP1    | 1.532669 | 3.209003 |          | 2.393223 | 2.25948  |
| GNB2L1   | 2.348412 | 2.589572 | 2.593452 |          | 1.783433 |
| AKR7A2   |          | 4.006895 | 2.149501 | 3.14305  |          |
| RBM4     | 2.161582 |          | 2.63853  | 2.561265 | 1.856834 |
| ALDH1B1  | 2.727469 |          |          | 3.086537 | 3.368817 |
| LDHA     | 2.273628 | 2.898453 |          | 2.15447  | 1.798486 |
| GSTO1    |          | 3.005323 |          | 2.537045 | 3.541855 |

|          |          |          |          |          |          |
|----------|----------|----------|----------|----------|----------|
| PSMA5    | 1.957143 |          |          | 4.056486 | 3.056311 |
| UQCRQ    | 3.153111 |          | 3.371798 | 2.510616 |          |
| HN1L     | 2.666766 | 2.430175 |          | 1.88859  | 2.036972 |
| OCIAD1   |          | 3.147393 |          | 2.458012 | 3.410539 |
| PGRMC2   | 2.008998 |          | 2.229268 | 2.424186 | 2.334954 |
| DDX18    | 4.590466 |          | 4.310728 |          |          |
| CSTB     | 2.761996 |          | 2.598097 | 1.623387 | 1.839498 |
| TIMM10B  | 2.58872  |          | 3.096328 | 3.107261 |          |
| CA2      | 2.870022 |          | 2.295799 | 1.833711 | 1.718721 |
| AFG3L2   |          | 4.464799 |          |          | 4.228582 |
| TMA16    | 2.495131 |          | 1.950916 | 2.109972 | 2.115403 |
| APP      | 2.310159 |          |          | 2.624403 | 3.665709 |
| SRCAP    | 2.436201 |          | 2.518214 | 3.549004 |          |
| RBBP4    |          |          | 2.181494 | 3.446305 | 2.845    |
| PLS3     | 1.780727 | 2.573552 | 2.46333  | 1.569557 |          |
| PPP1R12A |          | 3.297794 | 2.374605 | 2.699813 |          |
| CPT2     | 2.606142 |          | 2.640206 | 3.010849 |          |
| TNPO1    | 2.641196 |          |          | 2.069971 | 3.500907 |
| MAT2A    | 1.858518 | 2.523125 |          | 1.753231 | 2.075498 |
| SNX27    |          |          | 2.795569 | 2.711297 | 2.685207 |
| SMARCB1  | 1.645532 |          | 1.956902 | 2.015545 | 2.532361 |
| PSMD1    | 2.787046 |          | 2.086426 | 3.123025 |          |
| ETF1     | 2.917977 | 3.157897 |          | 1.902054 |          |
| ZRANB2   |          | 3.343242 | 1.927306 | 2.635135 |          |
| PACSIN3  | 2.356966 |          | 2.507978 | 3.03769  |          |
| YWHAH    | 2.089552 | 3.409867 | 2.333325 |          |          |
| GRHPR    |          | 3.392176 |          | 2.097906 | 2.341322 |
| PSMA8    | 2.054712 | 3.637178 |          |          | 2.127227 |
| PPA2     |          |          |          | 3.95158  | 3.854381 |
| HINT1    | 2.84078  |          |          | 2.270888 | 2.674395 |
| NDUFS2   | 2.26182  | 3.080232 | 2.427733 |          |          |
| CPSF6    | 1.998553 | 3.034406 | 2.714343 |          |          |
| HDGFRP2  | 2.535347 |          | 2.21542  | 2.987821 |          |
| MYL12A   |          | 2.558908 | 2.996801 |          | 2.007677 |
| MYL9     |          | 2.558908 | 2.996801 |          | 2.007677 |
| ANXA5    | 3.476821 |          |          |          | 4.081206 |
| UGGT1    |          |          |          | 3.693257 | 3.788686 |
| PDHA1    |          | 3.938837 |          |          | 3.524289 |
| EPB41L2  |          | 3.167772 | 2.057228 | 2.234527 |          |
| HDAC2    |          | 3.140277 |          | 2.097403 | 2.15282  |
| NDUFS5   |          | 4.017659 |          |          | 3.362489 |
| SPTLC1   | 2.486707 |          | 2.520369 | 2.338684 |          |
| SLC25A24 | 3.6445   |          | 3.690906 |          |          |
| WDR5     |          | 2.575757 | 2.991702 |          | 1.747565 |
| BPTF     |          |          |          | 3.211157 | 4.071586 |

|          |          |          |          |          |          |
|----------|----------|----------|----------|----------|----------|
| TMEM201  | 2.151654 |          | 2.131159 |          | 2.998632 |
| UBA2     | 4.251832 |          |          | 2.939574 |          |
| EIF4H    | 2.794319 | 2.41855  |          | 1.973526 |          |
| EHD4     | 2.489073 | 2.69431  |          | 1.984306 |          |
| SNRNP70  | 1.826642 |          | 3.11858  | 2.169871 |          |
| MTX1     | 2.394999 |          |          | 2.656181 | 2.045594 |
| NDUFV2   |          | 3.557369 |          | 3.500068 |          |
| HMG5     | 2.602247 |          |          | 2.295152 | 2.120885 |
| SOD1     | 2.48908  | 2.681171 |          |          | 1.767386 |
| SERPINB6 | 1.701367 |          | 2.574172 | 2.623402 |          |
| THOP1    | 1.83052  | 3.0669   | 1.994517 |          |          |
| CNPY2    | 1.692812 |          |          | 2.535902 | 2.658029 |
| NDUFS3   |          | 3.634004 |          |          | 3.24777  |
| KHSRP    | 2.337543 |          | 2.334367 | 2.18284  |          |
| RGPD8    |          |          | 2.790729 | 1.993185 | 2.044556 |
| LUC7L    | 2.14825  |          |          | 2.646635 | 2.012103 |
| FAM192A  | 2.19678  |          | 2.101662 | 2.502472 |          |
| NIP30    | 2.19678  |          | 2.101662 | 2.502472 |          |
| FDXR     |          | 3.204603 |          |          | 3.569308 |
| DIABLO   | 3.470922 |          |          | 3.162607 |          |
| CTSD     | 2.764534 |          | 2.184228 | 1.633458 |          |
| PDXK     |          | 2.768878 |          | 3.813    |          |
| ENOPH1   |          | 3.275681 |          | 3.281413 |          |
| ADH5     |          | 4.438559 |          |          | 2.107903 |
| ATP6V1A  | 2.616283 |          | 3.914687 |          |          |
| BOLA2B   | 1.949802 |          | 2.531919 |          | 2.030146 |
| PSMD2    | 2.575998 |          |          | 1.913183 | 1.991732 |
| HSPH1    | 1.861151 | 2.481301 |          | 2.136592 |          |
| ESYT1    | 6.467632 |          |          |          |          |
| ANXA11   | 2.758876 |          |          | 3.679571 |          |
| PSMC4    | 3.62412  |          | 2.79761  |          |          |
| MRPL54   | 1.979787 |          |          | 2.264255 | 2.176214 |
| DBNL     | 1.992865 | 2.598789 |          | 1.799021 |          |
| COX17    |          | 4.138176 |          | 2.176945 |          |
| NENF     |          | 4.063449 | 2.228286 |          |          |
| HTATSF1  |          |          |          | 3.434256 | 2.841531 |
| ERO1L    | 2.105464 |          | 1.902549 | 2.165832 |          |
| TFG      |          | 3.504833 | 2.649044 |          |          |
| ANP32B   | 2.161234 | 2.40423  |          | 1.576709 |          |
| NEDD8    | 1.710424 |          | 2.308731 |          | 2.099346 |
| ARHGDI1A | 2.916074 | 3.189264 |          |          |          |
| NACA     | 2.736439 | 3.312098 |          |          |          |
| NACAP1   | 2.736439 | 3.312098 |          |          |          |
| HMG1     |          |          |          | 3.839661 | 2.196214 |
| SMC4     | 2.875315 |          |          |          | 3.15906  |

|          |          |          |          |          |          |
|----------|----------|----------|----------|----------|----------|
| GNL3L    | 1.872913 |          |          | 2.058355 | 2.092061 |
| AP2B1    | 2.388375 |          |          | 3.517103 |          |
| RPS10    |          |          |          | 1.902229 | 3.988693 |
| RPL36A   |          |          |          | 1.932089 | 3.95545  |
| ATP6V1G1 | 1.704632 |          |          | 2.084276 | 2.070331 |
| PHF10    |          | 3.305897 |          | 2.50985  |          |
| YME1L1   | 2.878041 |          | 2.931416 |          |          |
| PSMC2    | 1.933995 |          |          | 1.554068 | 2.315774 |
| COX5A    | 2.388357 |          |          |          | 3.343177 |
| RAB10    | 1.929802 |          |          | 1.841796 | 1.939974 |
| ACTN1    | 2.743049 |          | 2.909647 |          |          |
| PRRC2C   | 2.79258  |          |          | 2.843893 |          |
| SDF2L1   |          |          | 3.044193 | 2.573121 |          |
| MRPL43   | 2.253248 |          |          |          | 3.299464 |
| WARS2    | 1.617425 |          |          | 1.919252 | 2.003444 |
| PSMA3    | 2.130522 |          |          | 1.587251 | 1.821469 |
| C7orf50  |          |          |          | 2.674377 | 2.84751  |
| ANXA7    |          |          |          | 2.082532 | 3.42387  |
| CHP1     |          |          | 2.296386 | 3.203726 |          |
| MBD3     |          |          |          | 5.476899 |          |
| CCDC51   |          |          | 2.237144 |          | 3.233808 |
| ALDOA    | 3.534905 |          | 1.90478  |          |          |
| ALDH3A2  |          |          | 2.556438 | 2.881385 |          |
| MT1G     |          |          |          | 1.866686 | 3.544116 |
| MT1X     |          |          |          | 1.866686 | 3.544116 |
| MT2A     |          |          |          | 1.866686 | 3.544116 |
| ANP32A   |          | 3.16617  |          | 2.236798 |          |
| STRAP    | 3.161106 |          | 2.228816 |          |          |
| ACAT2    |          |          |          | 2.202422 | 3.170913 |
| ARL6IP1  |          |          |          | 2.28348  | 3.061888 |
| RPP30    |          | 3.162947 |          | 2.175497 |          |
| MRPL28   | 2.89524  | 2.435261 |          |          |          |
| SOAT1    |          | 3.393369 | 1.908336 |          |          |
| PSMD3    |          | 2.901293 |          | 2.399148 |          |
| CDK12    |          |          |          | 1.934796 | 3.358473 |
| MTHFD1   | 2.035142 | 3.256585 |          |          |          |
| TMEM109  |          |          |          | 1.583293 | 3.660171 |
| TIMM44   | 2.288551 |          |          | 2.954102 |          |
| HMGB1    |          |          | 2.053238 |          | 3.185158 |
| AASDHPPT |          | 3.698679 |          | 1.525075 |          |
| PLAA     | 3.183263 |          | 2.019315 |          |          |
| HOGA1    |          | 5.126284 |          |          |          |
| MTAP     |          |          |          | 2.186789 | 2.92956  |
| RRM1     | 2.889854 |          |          | 2.177119 |          |
| GLA      | 1.70232  | 3.359821 |          |          |          |

|           |          |          |          |          |          |
|-----------|----------|----------|----------|----------|----------|
| TPM1      | 2.048929 | 3.011784 |          |          |          |
| WAC       |          | 3.087276 |          |          | 1.966984 |
| IK        | 2.841029 |          |          |          | 2.203195 |
| PABPC4    | 1.94145  | 3.067632 |          |          |          |
| CAPNS1    | 2.211067 |          | 2.743208 |          |          |
| RPL6      | 2.4604   |          | 2.489208 |          |          |
| ENAH      |          |          | 2.181123 | 2.764129 |          |
| GOLGB1    |          |          | 2.234753 | 2.696459 |          |
| MAPRE1    | 1.791286 |          | 3.121137 |          |          |
| LDHC      | 1.794485 |          |          |          | 3.10659  |
| LDHAL6A   | 1.789159 |          |          |          | 3.10659  |
| POLR2C    | 2.819616 |          |          |          | 2.066271 |
| DNMT1     |          |          | 2.593665 | 2.288293 |          |
| RPSA      | 2.881093 |          | 1.988933 |          |          |
| RPSAP58   | 2.881093 |          | 1.988933 |          |          |
| DHX16     | 2.101774 |          |          |          | 2.768185 |
| PFDN1     | 2.42461  | 2.441221 |          |          |          |
| CALR      | 1.913297 |          |          | 2.936833 |          |
| MGST3     |          |          |          | 2.011989 | 2.80992  |
| PRMT1     |          |          |          | 2.329166 | 2.443066 |
| PTPN11    |          |          |          | 2.256195 | 2.514812 |
| FAM136A   | 2.424383 |          |          | 2.335816 |          |
| HIST1H2AA | 2.666481 |          |          |          | 2.092809 |
| HIST2H2AB | 2.666481 |          |          |          | 2.092809 |
| HSD17B4   |          |          | 2.48396  | 2.26284  |          |
| MYH14     |          | 2.91099  |          | 1.83238  |          |
| GTF2B     | 1.651819 | 3.085004 |          |          |          |
| HSP90AA2P | 2.035183 |          |          | 2.69993  |          |
| DYNLL2    |          |          |          | 1.914272 | 2.783023 |
| MRPL48    | 2.150361 |          | 2.539726 |          |          |
| SRRT      | 1.979584 |          | 2.709848 |          |          |
| ME2       |          |          |          | 2.436454 | 2.221229 |
| RPS15A    |          |          |          | -2.02694 | 6.675799 |
| COPS4     | 1.990373 |          | 2.657296 |          |          |
| ZC3H15    |          |          | 2.757377 | 1.855163 |          |
| TOR1AIP2  | 2.459627 |          | 2.117487 |          |          |
| ACTN3     | 2.252729 |          | 2.320214 |          |          |
| IDH3G     |          |          |          | 2.446435 | 2.121665 |
| CBX3      | 2.15162  |          |          |          | 2.327079 |
| EPHX1     | 2.42765  |          |          | 2.040366 |          |
| UQCRH     | 2.010752 |          | 2.449987 |          |          |
| RPS6      |          |          | 2.411445 | 2.04335  |          |
| DSP       | 4.434354 |          |          |          |          |
| SLC25A12  | 2.405652 |          | 2.026509 |          |          |
| PSPC1     |          |          | 2.215189 | 2.182588 |          |



|          |          |          |          |          |          |
|----------|----------|----------|----------|----------|----------|
| GNAI2    | 2.314332 |          |          | 2.079175 |          |
| PAFAH1B1 | 2.375067 |          |          | 2.002867 |          |
| LAGE3    | 2.554402 |          |          | 1.78     |          |
| PHKA1    |          | 4.328953 |          |          |          |
| CHMP2B   | 2.384917 |          |          | 1.910879 |          |
| DNAJC10  | 2.077288 |          | 2.212304 |          |          |
| SF3B5    |          |          |          | 1.882338 | 2.406396 |
| PPP4C    | 1.822557 |          |          | 2.451841 |          |
| PGK1     | 2.342255 |          |          |          | 1.91809  |
| ASF1A    |          | 4.260295 |          |          |          |
| SMAP1    | 2.648268 |          |          | 1.562437 |          |
| ATP5I    | 2.209109 |          |          |          | 1.989552 |
| DOCK7    |          |          |          | 1.939902 | 2.249794 |
| ARPC4    | 1.716356 | 2.463381 |          |          |          |
| EIF4A1   | 1.93007  |          |          | 2.230942 |          |
| TTL12    | 2.391918 |          |          | 1.752711 |          |
| EXD2     |          |          | 1.955702 | 2.16254  |          |
| RPS11    | 2.593197 |          |          | 1.507423 |          |
| OSGEP    |          | 4.05778  |          |          |          |
| KCTD8    | 1.628728 |          |          | 2.411947 |          |
| NUP205   |          |          | 4.011751 |          |          |
| ACIN1    |          |          |          | 1.894929 | 2.097997 |
| IQGAP3   | 2.151935 |          |          | 1.822634 |          |
| AP1G1    |          |          |          | 1.65093  | 2.316004 |
| SEC62    |          | 3.962062 |          |          |          |
| NUP205   |          | 3.948217 |          |          |          |
| HK1      |          |          |          | 1.409166 | 2.506763 |
| UTP14A   | 1.543426 |          |          |          | 2.36726  |
| RPS27    | 1.88114  |          |          | 1.999324 |          |
| PPA1     | 1.871631 |          |          | 2.00716  |          |
| BANF1    | 1.706804 |          |          |          | 2.151884 |
| KCTD5    |          |          | 1.956284 | 1.893866 |          |
| DNAJB6   | 1.701296 |          |          | 2.06817  |          |
| PLOD2    | 1.718174 |          | 2.000222 |          |          |
| UTP18    |          |          |          | 1.805531 | 1.869702 |
| IDH3B    |          |          |          |          | 3.656461 |
| BCL2L10  | 1.669657 |          | 1.974647 |          |          |
| NUP205   | 3.59716  |          |          |          |          |
| TUBAL3   |          |          |          | 1.486187 | 2.070702 |
| UBXN1    |          | 3.527064 |          |          |          |
| SF3B2    | 1.581034 |          |          | 1.940455 |          |
| GEMIN7   |          | 3.502426 |          |          |          |
| MAGED1   | 1.546411 |          | 1.942262 |          |          |
| UBE2R2   | 1.658584 |          |          | 1.828429 |          |
| PYCR1    |          | 3.473145 |          |          |          |

|                |          |          |          |          |          |
|----------------|----------|----------|----------|----------|----------|
| HSPA4L         |          | 3.456945 |          |          |          |
| SNX3           |          |          |          | 1.423574 | 2.022859 |
| PTGES3L-AARSD1 |          | 3.436269 |          |          |          |
| NUP205         |          |          |          | 3.431362 |          |
| LAMC1          |          |          | 3.42987  |          |          |
| PPP2R2A        | 1.511792 |          |          | 1.916157 |          |
| PPP2R2C        | 1.511792 |          |          | 1.916157 |          |
| PDCD2L         |          | 3.42431  |          |          |          |
| PLS1           |          | 3.420443 |          |          |          |
| CHCHD2         |          | 3.419457 |          |          |          |
| CHCHD2P9       |          | 3.419457 |          |          |          |
| PSAT1          | 3.387672 |          |          |          |          |
| TCEB1          |          |          | 3.377493 |          |          |
| SEPT2          |          |          |          |          | 3.360739 |
| CKM            |          |          |          |          | 3.357243 |
| PDHB           |          |          |          | 1.606184 | 1.70882  |
| FAIM           |          | 3.276535 |          |          |          |
| FAM162A        |          | 3.274371 |          |          |          |
| YARS           |          | 3.244497 |          |          |          |
| PSMD11         |          | 3.198749 |          |          |          |
| MRPS12         |          | 3.192674 |          |          |          |
| CSNK2A3        |          | 3.176461 |          |          |          |
| CSNK2A1        |          | 3.155441 |          |          |          |
| MDH1           |          |          |          |          | 3.123632 |
| RANBP3         |          |          |          |          | 3.117864 |
| CDK4           |          | 3.111454 |          |          |          |
| ZC3H14         |          | 3.100158 |          |          |          |
| ACAD9          |          | 3.09858  |          |          |          |
| ATP2B1         |          | 3.097474 |          |          |          |
| ATP2B2         |          | 3.097474 |          |          |          |
| ATP2B3         |          | 3.097474 |          |          |          |
| ATP2B4         |          | 3.097474 |          |          |          |
| CDV3           |          | 3.088501 |          |          |          |
| C19orf43       |          |          |          | 3.070379 |          |
| GALNT2         |          | 3.04039  |          |          |          |
| HMG20B         |          |          |          | 3.038872 |          |
| CHD1L          |          |          |          | 3.032643 |          |
| STK24          |          | 3.028067 |          |          |          |
| STK25          |          | 3.028067 |          |          |          |
| RIF1           |          | 3.016445 |          |          |          |
| ACAT1          |          | 3.012769 |          |          |          |
| TPM2           |          | 3.011784 |          |          |          |
| MT1A           |          |          |          |          | 3.005103 |
| MT1H           |          |          |          |          | 3.005103 |
| PARK7          |          |          |          |          | 2.96116  |

|             |          |          |          |          |          |
|-------------|----------|----------|----------|----------|----------|
| NARS        |          |          |          | 2.941801 |          |
| LMAN2       | 2.933306 |          |          |          |          |
| CAD         |          |          | 2.893146 |          |          |
| CCDC137     |          |          |          | 2.878167 |          |
| CKB         | 2.859572 |          |          |          |          |
| NAE1        |          |          |          | 2.826385 |          |
| MRPL12      |          |          |          |          | 2.728866 |
| COPB1       |          |          | 2.664215 |          |          |
| ECM29       |          |          |          | 2.645276 |          |
| KIAA0368    |          |          |          | 2.645276 |          |
| POLR2H      |          |          | 2.606262 |          |          |
| GLS         | 2.584366 |          |          |          |          |
| DDX6        |          |          | 2.573355 |          |          |
| EIF1        | 2.526719 |          |          |          |          |
| EIF1B       | 2.526719 |          |          |          |          |
| PDCD6IP     |          | 2.511739 |          |          |          |
| DDX52       |          |          |          |          | 2.502621 |
| PPARGC1A    | 2.486487 |          |          |          |          |
| MGA         |          |          |          | 2.473859 |          |
| MRPL53      |          |          |          | 2.473469 |          |
| ESD         | 2.470817 |          |          |          |          |
| RPL18A      |          |          |          |          | 2.453296 |
| HEATR1      |          |          |          | 2.438567 |          |
| DOCK7       | 2.418229 |          |          |          |          |
| TUBA8       | 2.417177 |          |          |          |          |
| LIN7A       |          |          | 2.394971 |          |          |
| NDNL2       | 2.389726 |          |          |          |          |
| LSM14A      | 2.375981 |          |          |          |          |
| NUP54       |          |          |          | 2.332131 |          |
| LMNA        |          |          |          |          | 2.318342 |
| ILVBL       |          |          | 2.309169 |          |          |
| PRDX1       | 2.303121 |          |          |          |          |
| PPP1R10     |          |          |          | 2.299803 |          |
| CKS2        |          |          |          |          | 2.286614 |
| HN1         | 2.261527 |          |          |          |          |
| CIRH1A      |          |          | 2.256529 |          |          |
| TPT1        | 2.245111 |          |          |          |          |
| hCG_1789329 | 2.234425 |          |          |          |          |
| UBE2L3      | 2.234425 |          |          |          |          |
| MTX2        | 2.231884 |          |          |          |          |
| CALM2       |          |          |          | 2.228614 |          |
| FIP1L1      | 2.227989 |          |          |          |          |
| TOMM22      | 2.212318 |          |          |          |          |
| MAP4        |          |          |          |          | 2.212317 |
| DNAJB2      | 2.206076 |          |          |          |          |

|         |          |  |          |          |          |
|---------|----------|--|----------|----------|----------|
| LSS     |          |  |          |          | 2.191629 |
| VAT1    |          |  |          | 2.183554 |          |
| NAP1L1  | 2.17548  |  |          |          |          |
| ATP5B   | 2.159474 |  |          |          |          |
| DDOST   | 2.159271 |  |          |          |          |
| TJP1    |          |  |          | 2.158858 |          |
| IDI1    |          |  |          | 2.156117 |          |
| TAGLN3  | 2.148493 |  |          |          |          |
| PFDN4   |          |  |          | 2.145523 |          |
| TRAX    |          |  |          | 2.136881 |          |
| PDE12   | 2.133018 |  |          |          |          |
| TMF1    |          |  |          |          | 2.132511 |
| TUBB8   |          |  |          | 2.128161 |          |
| COIL    |          |  |          |          | 2.100155 |
| DHX33   | 2.096235 |  |          |          |          |
| SDHB    | 2.094945 |  |          |          |          |
| PRMT8   |          |  |          | 2.088374 |          |
| MTHFD2  |          |  |          | 2.079437 |          |
| ANP32E  | 2.072497 |  |          |          |          |
| LDHB    | 2.071007 |  |          |          |          |
| MRPL46  |          |  | 2.069481 |          |          |
| TMEM9   |          |  |          | 2.054093 |          |
| PFDN5   |          |  |          | 2.052757 |          |
| UQCRC2  | 2.049927 |  |          |          |          |
| CMAS    |          |  |          | 2.044738 |          |
| DBI     | 2.038908 |  |          |          |          |
| TMED9   |          |  | 2.033713 |          |          |
| AGPS    | 2.032368 |  |          |          |          |
| CCT6B   |          |  |          | 2.028045 |          |
| NDUFB9  | 2.025071 |  |          |          |          |
| NCKAP1  |          |  |          | 2.022791 |          |
| AKAP1   |          |  |          | 2.011758 |          |
| FDX1    |          |  |          |          | 2.010488 |
| SOD2    |          |  |          | 2.010397 |          |
| TUBA4B  |          |  |          | 2.008657 |          |
| PCK2    |          |  |          | 2.000648 |          |
| MKL1    |          |  |          |          | 2.000062 |
| PRCC    |          |  | 1.997925 |          |          |
| PRPF38B |          |  |          |          | 1.975254 |
| NAA50   |          |  |          |          | 1.973319 |
| ZNF598  |          |  |          | 1.962391 |          |
| DYNC1I2 | 1.957454 |  |          |          |          |
| DDX19A  |          |  | 1.952081 |          |          |
| HIBADH  | 1.951777 |  |          |          |          |
| PHF3    |          |  |          |          | 1.951484 |

|           |          |  |          |          |          |
|-----------|----------|--|----------|----------|----------|
| NME1      |          |  |          | 1.945841 |          |
| ATG3      |          |  | 1.94484  |          |          |
| H2AFZ     |          |  |          |          | 1.94246  |
| DNAJB1    | 1.938936 |  |          |          |          |
| UBAP2     |          |  |          | 1.938873 |          |
| POLDIP2   | 1.926464 |  |          |          |          |
| POLA2     |          |  |          |          | 1.925312 |
| METAP2    |          |  |          |          | 1.923882 |
| C9orf78   |          |  |          |          | 1.923778 |
| APEH      | 1.921841 |  |          |          |          |
| CISD1     | 1.91902  |  |          |          |          |
| SEPT8     |          |  | 1.912634 |          |          |
| SEPT11    |          |  | 1.912634 |          |          |
| PABPN1    | 1.911763 |  |          |          |          |
| SMEK1     |          |  |          | 1.901475 |          |
| FBL       |          |  |          |          | 1.876947 |
| UBE2D3    |          |  |          | 1.866316 |          |
| PFDN6     |          |  |          | 1.865474 |          |
| MARCKSL1  | 1.865082 |  |          |          |          |
| PITHD1    |          |  |          | 1.864952 |          |
| PPP1R12C  | 1.863474 |  |          |          |          |
| HIST1H2AC | 1.861164 |  |          |          |          |
| SMNDC1    |          |  |          | 1.851577 |          |
| CUL1      | 1.828719 |  |          |          |          |
| IMPA1     |          |  |          | 1.825188 |          |
| TTC9C     | 1.821079 |  |          |          |          |
| DDT       |          |  |          | 1.814752 |          |
| DDTL      |          |  |          | 1.814752 |          |
| TBCD      |          |  |          | 1.81254  |          |
| DCTPP1    | 1.799434 |  |          |          |          |
| MAPKAPK2  | 1.798719 |  |          |          |          |
| MAPKAPK3  | 1.798719 |  |          |          |          |
| TROVE2    | 1.795647 |  |          |          |          |
| PDCD6     | 1.783259 |  |          |          |          |
| AMPD2     | 1.779243 |  |          |          |          |
| RAD50     |          |  |          | 1.776804 |          |
| SYNGR1    | 1.763476 |  |          |          |          |
| POLD1     | 1.763066 |  |          |          |          |
| PFN1      | 1.743875 |  |          |          |          |
| VPS36     | 1.743385 |  |          |          |          |
| C10orf71  | 1.731166 |  |          |          |          |
| NOB1      | 1.729767 |  |          |          |          |
| MRPL32    | 1.710582 |  |          |          |          |
| ANKHD1    | 1.710544 |  |          |          |          |
| CTPS1     | 1.704521 |  |          |          |          |

|          |          |  |  |          |          |
|----------|----------|--|--|----------|----------|
| NUCB1    |          |  |  | 1.690761 |          |
| APRT     | 1.686382 |  |  |          |          |
| SUZ12    | 1.685997 |  |  |          |          |
| ACOT7    | 1.685864 |  |  |          |          |
| NHP2     | 1.685038 |  |  |          |          |
| RBMXL3   | 1.676899 |  |  |          |          |
| POLR1E   | 1.666938 |  |  |          |          |
| FAM207A  | 1.652359 |  |  |          |          |
| UBA1     | 1.647073 |  |  |          |          |
| DIAPH1   | 1.633387 |  |  |          |          |
| RNH1     | 1.628907 |  |  |          |          |
| U2SURP   | 1.618614 |  |  |          |          |
| PHF23    |          |  |  | 1.614554 |          |
| HNRNPK   | 1.607343 |  |  |          |          |
| PRIM1    | 1.597759 |  |  |          |          |
| H2AFV    | 1.593994 |  |  |          |          |
| EIF3A    |          |  |  | 1.592466 |          |
| FERMT2   | 1.572889 |  |  |          |          |
| ITGB1    | 1.567502 |  |  |          |          |
| PM20D2   | 1.554792 |  |  |          |          |
| PPID     | 1.547211 |  |  |          |          |
| GIN51    | 1.540723 |  |  |          |          |
| PPME1    | 1.526376 |  |  |          |          |
| RRAS2    | 1.514699 |  |  |          |          |
| RFC2     | 1.506353 |  |  |          |          |
| C19orf47 |          |  |  | 1.505053 |          |
| SCFD1    |          |  |  | 1.472808 |          |
| WIBG     |          |  |  | 1.47246  |          |
| PTBP3    |          |  |  | 1.447429 |          |
| TSN      |          |  |  | 1.432603 |          |
| CPOX     |          |  |  | 1.400861 |          |
| RAP1A    |          |  |  | -1.5022  |          |
| OSBPL11  | -1.51357 |  |  |          |          |
| DNM3     | -1.56321 |  |  |          |          |
| SMARCA4  | -1.60746 |  |  |          |          |
| NOMO3    | -1.6223  |  |  |          |          |
| TMED2    | -1.62377 |  |  |          |          |
| RNF40    | -1.63349 |  |  |          |          |
| MRPS25   | -1.63374 |  |  |          |          |
| RBBP5    | -1.63827 |  |  |          |          |
| RING1    |          |  |  |          | -1.70282 |
| RPL35A   | -1.71821 |  |  |          |          |
| PPP2R1A  | -1.72012 |  |  |          |          |
| HNRNPL   | -1.72141 |  |  |          |          |
| DCXR     | -1.7558  |  |  |          |          |

|           |          |  |          |          |          |
|-----------|----------|--|----------|----------|----------|
| PMPCB     |          |  |          |          | -1.76768 |
| CHRA1     | -1.83688 |  |          |          |          |
| MRPS31    |          |  |          | -1.85732 |          |
| POM121    |          |  |          | -1.85735 |          |
| POM121C   |          |  |          | -1.85735 |          |
| TXNDC12   | -1.85812 |  |          |          |          |
| CLPB      | -1.88229 |  |          |          |          |
| ZNF638    | -1.90258 |  |          |          |          |
| PAWR      |          |  | -1.90414 |          |          |
| SYMPK     |          |  |          |          | -1.90478 |
| MED1      |          |  | -1.9071  |          |          |
| NACC1     |          |  | -1.90732 |          |          |
| NACC2     |          |  | -1.90732 |          |          |
| PLD3      |          |  |          |          | -1.90836 |
| CHD3      |          |  |          | -1.90974 |          |
| HUWE1     |          |  | -1.9169  |          |          |
| WDR46     |          |  |          | -1.91871 |          |
| RAB21     |          |  | -1.9247  |          |          |
| LYPLA2    |          |  |          | -1.92699 |          |
| CTTN      | -1.93615 |  |          |          |          |
| RANBP9    |          |  | -1.94245 |          |          |
| UFD1L     |          |  |          |          | -1.94603 |
| CBX2      | -1.96467 |  |          |          |          |
| UBE2I     |          |  | -1.96844 |          |          |
| GOLIM4    | -1.98079 |  |          |          |          |
| CTNNA1    |          |  | -1.98626 |          |          |
| PSMD9     |          |  |          |          | -1.99158 |
| CELF1     |          |  |          | -1.99764 |          |
| KIF4B     | -1.99927 |  |          |          |          |
| SHMT1     |          |  |          | -2.00473 |          |
| RPL11     |          |  |          | -2.00553 |          |
| GBA       | -2.0069  |  |          |          |          |
| NOL7      |          |  | -2.00735 |          |          |
| NDUFAB1   |          |  | -2.01155 |          |          |
| EEFSEC    |          |  |          | -2.0158  |          |
| TRUB1     |          |  |          |          | -2.01907 |
| PTGES2    |          |  | -2.02908 |          |          |
| CLNS1A    |          |  |          | -2.02988 |          |
| CUTC      |          |  |          | -2.03018 |          |
| NEFM      |          |  | -2.04794 |          |          |
| PPP2R1B   |          |  |          | -2.05802 |          |
| KRBA2     | -2.06098 |  |          |          |          |
| TXNL1     |          |  |          |          | -2.06798 |
| HIST1H2BA |          |  |          | -2.0687  |          |
| KMT2C     |          |  |          | -2.07202 |          |

|         |          |  |          |          |          |
|---------|----------|--|----------|----------|----------|
| ATP2C1  |          |  |          | -2.07212 |          |
| RPL9    | -2.07483 |  |          |          |          |
| EIF4E   |          |  |          | -2.07665 |          |
| PSMG2   | -2.07872 |  |          |          |          |
| MOV10   |          |  |          | -2.07879 |          |
| LAP3    | -2.08313 |  |          |          |          |
| RNF114  |          |  | -2.08724 |          |          |
| RPL26L1 | -2.09442 |  |          |          |          |
| GTF3C5  | -2.09759 |  |          |          |          |
| HSPA8   |          |  |          | -2.10432 |          |
| HIGD1A  |          |  | -2.10586 |          |          |
| HIGD1C  |          |  | -2.10586 |          |          |
| EMC10   |          |  |          | -2.10896 |          |
| XRCC1   | -2.11136 |  |          |          |          |
| PPAT    |          |  |          | -2.1158  |          |
| DAD1    | -2.12371 |  |          |          |          |
| DDRGK1  |          |  |          | -2.12927 |          |
| CYB5R3  |          |  |          | -2.13262 |          |
| LCLAT1  |          |  | -2.13954 |          |          |
| DBR1    |          |  | -2.1424  |          |          |
| KRT77   | -2.14284 |  |          |          |          |
| CCDC58  |          |  | -2.14546 |          |          |
| PELO    |          |  |          |          | -2.14945 |
| TRMT1   |          |  |          |          | -2.14991 |
| MOGS    |          |  |          | -2.15906 |          |
| PAPSS1  | -2.15919 |  |          |          |          |
| WDR82   | -2.16014 |  |          |          |          |
| ALDH9A1 |          |  |          | -2.16259 |          |
| KIF5B   | -2.16446 |  |          |          |          |
| RBM12B  |          |  |          | -2.16828 |          |
| SDE2    | -2.17183 |  |          |          |          |
| CDCA7   |          |  |          | -2.18226 |          |
| SHMT2   | -2.19682 |  |          |          |          |
| MRPS18B | -2.20733 |  |          |          |          |
| SYAP1   | -2.21275 |  |          |          |          |
| MAGOH   |          |  |          | -2.21309 |          |
| GIPC1   |          |  | -2.21413 |          |          |
| RPL36AL |          |  | -2.21485 |          |          |
| ARL1    |          |  | -2.22219 |          |          |
| PGM1    | -2.236   |  |          |          |          |
| SUCLG1  |          |  | -2.2409  |          |          |
| DHRS7   | -2.24285 |  |          |          |          |
| LRRC59  |          |  |          | -2.24738 |          |
| TTBK1   | -2.24854 |  |          |          |          |
| ATP2A1  | -2.25179 |  |          |          |          |



|           |          |          |          |          |          |
|-----------|----------|----------|----------|----------|----------|
| GPHN      |          |          |          |          | -2.26148 |
| IRAK1     |          |          | -2.2662  |          |          |
| UROD      |          |          |          | -2.27214 |          |
| VPS26A    |          |          | -2.28432 |          |          |
| ACAA1     | -2.29947 |          |          |          |          |
| PANK4     |          |          | -2.30295 |          |          |
| MLEC      |          |          |          | -2.31137 |          |
| BMS1      | -2.3124  |          |          |          |          |
| DCBLD2    |          |          | -2.33989 |          |          |
| TBL2      |          |          |          | -2.34997 |          |
| RAB14     | -2.35919 |          |          |          |          |
| GRN       |          |          | -2.36509 |          |          |
| LAMTOR3   |          |          |          | -2.37282 |          |
| MYL12B    |          |          |          | -2.38689 |          |
| MRRF      |          |          | -2.41219 |          |          |
| ABHD14B   |          |          |          |          | -2.41239 |
| PSMB5     |          |          | -2.41301 |          |          |
| GNL1      | -2.42219 |          |          |          |          |
| TM9SF3    |          | -2.42335 |          |          |          |
| SBNO2     |          |          | -2.42691 |          |          |
| MORF4L1   | -2.4343  |          |          |          |          |
| CD276     |          |          | -2.43508 |          |          |
| ATPIF1    |          |          | -2.43791 |          |          |
| RBMXL2    |          |          |          | -2.44121 |          |
| NEFH      | -2.44445 |          |          |          |          |
| XPC       |          | -2.44949 |          |          |          |
| SLC25A4   |          |          |          | -2.4517  |          |
| HADH      |          |          |          | -2.45223 |          |
| NPEPPS    |          |          |          | -2.47122 |          |
| SCO2      |          |          | -2.47276 |          |          |
| ETFB      |          | -2.48834 |          |          |          |
| PGLS      | -2.49142 |          |          |          |          |
| POLR2A    |          |          | -2.49721 |          |          |
| NIPBL     |          |          | -2.50935 |          |          |
| ABCC4     |          |          |          | -2.51139 |          |
| EIF2A     |          |          |          |          | -2.51465 |
| DHCR24    |          |          |          | -2.51668 |          |
| Nbla03646 |          |          |          | -2.51668 |          |
| TMEM41B   |          |          | -2.52061 |          |          |
| PC        |          | -2.52993 |          |          |          |
| RBM23     |          |          |          |          | -2.53505 |
| UTP6      |          |          |          | -2.53598 |          |
| PCBP3     |          |          |          |          | -2.53672 |
| RBX1      |          |          | -2.54334 |          |          |
| DDB1      |          |          |          | -2.54819 |          |

|          |          |          |          |          |          |
|----------|----------|----------|----------|----------|----------|
| DIDO1    |          |          | -2.55182 |          |          |
| GK       |          |          | -2.56566 |          |          |
| GK3P     |          |          | -2.56566 |          |          |
| EIF3F    |          |          | -2.57647 |          |          |
| SFN      |          |          | -2.57736 |          |          |
| SLC7A1   | -2.57785 |          |          |          |          |
| MCM7     |          |          |          | -2.58545 |          |
| CPSF1    | -2.59122 |          |          |          |          |
| CHAMP1   |          |          |          |          | -2.59162 |
| GDI1     |          |          |          |          | -2.59405 |
| HNRNPLL  |          |          | -2.59659 |          |          |
| HNRPLL   |          |          | -2.59659 |          |          |
| LRRFIP2  |          |          | -2.59839 |          |          |
| PSMD10   |          |          |          |          | -2.59897 |
| CCT3     | -2.61403 |          |          |          |          |
| CHMP2A   |          |          |          |          | -2.61461 |
| STX12    |          |          | -2.64821 |          |          |
| CAPZA2   | -2.67259 |          |          |          |          |
| EED      |          | -2.68349 |          |          |          |
| THOC5    | -2.69022 |          |          |          |          |
| PSAP     | -2.69631 |          |          |          |          |
| C17orf85 |          |          | -2.70602 |          |          |
| RPL5     | -2.71899 |          |          |          |          |
| VTA1     |          |          |          |          | -2.72539 |
| USF1     |          |          | -2.73449 |          |          |
| COG4     |          |          |          |          | -2.74649 |
| UTP20    | -2.74654 |          |          |          |          |
| SACM1L   |          |          |          | -2.75981 |          |
| ARMC6    |          |          |          | -2.76764 |          |
| ACAA2    |          |          | -2.79336 |          |          |
| MYH9     |          |          |          | -2.79751 |          |
| CCT5     |          |          |          | -2.79829 |          |
| PSMC6    |          |          |          | -2.8007  |          |
| GRK6     |          |          | -2.8225  |          |          |
| SUPT5H   | -2.82668 |          |          |          |          |
| RBM3     |          |          | -2.84403 |          |          |
| CLASP1   |          |          | -2.85597 |          |          |
| BZW2     |          |          |          | -2.8614  |          |
| HIST3H3  |          |          |          | -2.88293 |          |
| UBR2     |          |          |          | -2.88687 |          |
| MSH3     |          | -2.89048 |          |          |          |
| RTN3     | -2.89473 |          |          |          |          |
| GMFB     |          |          |          | -2.90303 |          |
| SH3BGRL3 |          |          | -2.91687 |          |          |
| CD47     | -2.92683 |          |          |          |          |

|             |          |          |          |          |          |
|-------------|----------|----------|----------|----------|----------|
| SERPINH1    |          |          |          | -2.93421 |          |
| BAG2        |          |          | -2.93854 |          |          |
| C8orf33     | -2.9483  |          |          |          |          |
| UPF1        | -2.95958 |          |          |          |          |
| CHMP1A      |          |          |          | -2.97215 |          |
| PHIP        |          |          |          | -2.97956 |          |
| NOP58       | -3.00371 |          |          |          |          |
| KHDRBS2     |          |          |          |          | -3.0101  |
| MMAB        |          |          | -3.01343 |          |          |
| TMSB10      |          | -3.01967 |          |          |          |
| DLST        |          | -3.02289 |          |          |          |
| CRYZ        |          |          | -3.02327 |          |          |
| PNO1        |          | -3.02556 |          |          |          |
| CAPN1       |          | -3.02697 |          |          |          |
| SARNP       |          |          |          | -3.03775 |          |
| C21orf59    |          | -3.04659 |          |          |          |
| MAPK3       |          | -3.04997 |          |          |          |
| ATIC        |          | -3.05688 |          |          |          |
| ADNP        |          |          |          |          | -3.06114 |
| IKBKAP      |          |          |          |          | -3.06241 |
| NABP2       |          | -3.064   |          |          |          |
| CROCC       |          | -3.06424 |          |          |          |
| COX4I1      |          | -3.06636 |          |          |          |
| GNL3        |          | -3.06736 |          |          |          |
| PPAN-P2RY11 |          |          |          |          | -3.0722  |
| SNRPD2      |          | -3.07296 |          |          |          |
| COPE        |          |          |          | -3.07316 |          |
| RANGAP1     |          | -3.07439 |          |          |          |
| ABCE1       |          |          |          | -3.08331 |          |
| UPF3B       |          |          |          |          | -3.09273 |
| FARSA       |          |          |          |          | -3.09371 |
| SEC23IP     | -3.10191 |          |          |          |          |
| SRSF2       |          | -3.10301 |          |          |          |
| HSP90AA5P   |          | -3.10333 |          |          |          |
| DHX15       |          | -3.10422 |          |          |          |
| RPS28       |          | -3.1099  |          |          |          |
| SIN3A       |          | -3.11165 |          |          |          |
| MRPS30      |          | -3.11307 |          |          |          |
| UFL1        |          | -3.11457 |          |          |          |
| MAP2K4      |          |          | -3.11497 |          |          |
| RARS        |          |          | -3.11519 |          |          |
| PRKAR2A     |          | -3.1157  |          |          |          |
| KRT5        |          | -3.11605 |          |          |          |
| CLTB        |          | -3.12088 |          |          |          |
| PRKAG1      |          |          | -3.12308 |          |          |

|          |          |          |          |          |          |
|----------|----------|----------|----------|----------|----------|
| TCEA1    |          | -3.12765 |          |          |          |
| SEC61B   |          | -3.12897 |          |          |          |
| SRSF5    |          | -3.13381 |          |          |          |
| EIF6     | -3.14464 |          |          |          |          |
| RAP1GDS1 |          | -3.14529 |          |          |          |
| YWHAG    |          | -3.1595  |          |          |          |
| NUP188   |          | -3.16376 |          |          |          |
| AATF     |          |          |          |          | -3.1651  |
| PREP     |          | -3.17079 |          |          |          |
| HBA1     |          | -3.17336 |          |          |          |
| DHRS7B   |          |          |          | -3.18059 |          |
| PUM1     |          | -3.18742 |          |          |          |
| PUM2     |          | -3.18742 |          |          |          |
| GPD1L    |          |          |          | -3.20154 |          |
| SYNGR2   |          | -3.20197 |          |          |          |
| SREK1    |          |          |          |          | -3.20439 |
| ZC3HC1   |          | -3.20576 |          |          |          |
| RRP7A    |          | -3.20985 |          |          |          |
| RAB11A   |          | -3.21053 |          |          |          |
| RAB11B   |          | -3.21053 |          |          |          |
| CHAF1A   |          | -3.21161 |          |          |          |
| TRIP13   |          | -3.2142  |          |          |          |
| SMN1     |          | -3.21942 |          |          |          |
| SMN2     |          | -3.21942 |          |          |          |
| GNPDA1   |          | -3.22023 |          |          |          |
| STRIP1   |          | -3.24008 |          |          |          |
| VAMP2    |          | -3.24358 |          |          |          |
| VAMP3    |          | -3.24358 |          |          |          |
| NUP93    |          | -3.24546 |          |          |          |
| SEC22B   |          |          | -3.27461 |          |          |
| SUMF2    |          | -3.27645 |          |          |          |
| RNF2     |          |          | -3.28179 |          |          |
| U2AF1L4  |          | -3.28476 |          |          |          |
| HSD17B10 | -3.29486 |          |          |          |          |
| RAP1B    |          | -3.29739 |          |          |          |
| KHDRBS3  |          | -3.31358 |          |          |          |
| LSM7     |          | -3.32069 |          |          |          |
| EIF4G1   |          | -3.32379 |          |          |          |
| CSTF3    |          | -3.32629 |          |          |          |
| ARMC6    |          |          | -3.32637 |          |          |
| SLIRP    |          |          |          | -3.32717 |          |
| RAD21    |          |          |          |          | -3.33092 |
| GOT1     | -3.35792 |          |          |          |          |
| TOP1MT   |          | -3.36225 |          |          |          |
| CHCHD1   | -3.36453 |          |          |          |          |

|              |          |          |          |          |          |
|--------------|----------|----------|----------|----------|----------|
| ATP6V1C1     |          | -3.36457 |          |          |          |
| NOSIP        |          | -3.3716  |          |          |          |
| AK2          |          | -3.37229 |          |          |          |
| ASNSD1       |          |          |          |          | -3.37668 |
| UBE2S        |          | -3.38723 |          |          |          |
| LOC102724023 |          | -3.39518 |          |          |          |
| OXA1L        |          | -3.42674 |          |          |          |
| NCOA5        |          | -3.44026 |          |          |          |
| ARMC6        | -3.44215 |          |          |          |          |
| RRP12        |          | -3.44677 |          |          |          |
| AKR1E2       |          | -3.44747 |          |          |          |
| TBCB         |          | -3.45143 |          |          |          |
| LSM6         |          | -3.45214 |          |          |          |
| AHSA1        |          |          | -3.45441 |          |          |
| TIA1         |          | -3.45806 |          |          |          |
| MYL6B        |          | -3.46164 |          |          |          |
| AMOTL1       |          | -3.46536 |          |          |          |
| HNRNPA3      |          | -3.46885 |          |          |          |
| NDUFA7       |          | -3.4703  |          |          |          |
| AKAP8        |          | -3.48758 |          |          |          |
| GRPEL1       |          |          |          | -3.49332 |          |
| OXCT1        |          |          |          | -3.50082 |          |
| NPM3         |          |          |          | -3.50628 |          |
| TCEB2        |          | -3.51285 |          |          |          |
| GSPT1        |          | -3.53017 |          |          |          |
| FKBP4        |          | -3.53169 |          |          |          |
| C21orf33     |          | -3.53852 |          |          |          |
| KRT17        |          |          |          |          | -3.53999 |
| SMARCD1      | -1.61602 |          | -1.92634 |          |          |
| YTHDC2       |          |          |          | -3.54384 |          |
| MAP2K2       |          | -3.54691 |          |          |          |
| ZBTB33       |          |          |          |          | -3.54901 |
| TRIM25       |          | -3.55862 |          |          |          |
| SUMO4        |          | -3.56917 |          |          |          |
| PSMB7        |          | -3.57013 |          |          |          |
| PRPS1L1      | -3.57737 |          |          |          |          |
| LIN7B        |          | -3.58532 |          |          |          |
| NOL6         |          | -3.58545 |          |          |          |
| WIZ          |          | -3.58549 |          |          |          |
| EIF1AD       |          | -3.58561 |          |          |          |
| TMEM14C      |          | -3.58827 |          |          |          |
| YWHAQ        |          | -3.60965 |          |          |          |
| PRMT3        |          | -3.61031 |          |          |          |
| SRSF8        |          | -3.61854 |          |          |          |
| SLC7A5       | -1.65699 |          | -1.96423 |          |          |

|               |          |          |          |          |          |
|---------------|----------|----------|----------|----------|----------|
| SCAMP3        |          |          | -3.62602 |          |          |
| ATAD1         | -1.63517 |          |          | -1.99321 |          |
| NDUFAF3       |          |          |          | -1.86381 | -1.78061 |
| PRDX4         |          |          |          | -3.64721 |          |
| ITPR3         |          | -3.6474  |          |          |          |
| PPIH          |          | -3.65588 |          |          |          |
| ABCB7         |          | -3.67124 |          |          |          |
| KCTD15        |          | -3.6785  |          |          |          |
| S100A11       |          | -3.68005 |          |          |          |
| NRD1          |          | -3.68804 |          |          |          |
| MRPL38        |          | -3.69609 |          |          |          |
| ARCN1         |          | -3.69972 |          |          |          |
| SLC4A1AP      |          | -3.69995 |          |          |          |
| DKFZp313C1541 |          |          | -3.70497 |          |          |
| RAB2B         |          |          | -3.70497 |          |          |
| DNM2          | -3.70972 |          |          |          |          |
| TBC1D15       |          |          |          | -3.72648 |          |
| UBQLN1        |          | -3.72751 |          |          |          |
| UBQLN4        |          | -3.72751 |          |          |          |
| PSMD13        |          |          |          | -3.72753 |          |
| AK6           | -1.82588 |          | -1.90312 |          |          |
| TAF9          | -1.82588 |          | -1.90312 |          |          |
| TAF9B         | -1.82588 |          | -1.90312 |          |          |
| PAK2          |          |          | -3.75914 |          |          |
| SGTA          |          |          | -3.75919 |          |          |
| PRKCSH        |          | -3.76571 |          |          |          |
| EMC6          |          | -3.76712 |          |          |          |
| TCEA2         |          | -3.77435 |          |          |          |
| CSNK1E        |          | -3.78414 |          |          |          |
| MAD2L1        |          |          |          | -3.78417 |          |
| ATP5E         |          | -3.79663 |          |          |          |
| ATP5EP2       |          | -3.79663 |          |          |          |
| SMCHD1        |          | -3.80584 |          |          |          |
| POLR3E        | -1.74436 |          | -2.06153 |          |          |
| PGAM2         |          | -3.80782 |          |          |          |
| ASPSCR1       |          |          |          | -3.80926 |          |
| SUGP2         |          | -3.81071 |          |          |          |
| ZNF330        |          | -3.81254 |          |          |          |
| SNRPB         | -3.8186  |          |          |          |          |
| SNRPN         | -3.8186  |          |          |          |          |
| INA           | -1.65838 |          |          | -2.16121 |          |
| TIAL1         |          | -3.84441 |          |          |          |
| MTDH          |          |          | -3.86663 |          |          |
| IKBIP         | -3.87843 |          |          |          |          |
| WHSC1         |          | -3.88839 |          |          |          |

|         |          |          |          |          |          |
|---------|----------|----------|----------|----------|----------|
| CSRP2   |          |          | -3.88878 |          |          |
| FASN    |          |          |          |          | -3.89296 |
| SCPEP1  |          | -3.89582 |          |          |          |
| KPNA5   |          | -3.89825 |          |          |          |
| RANBP2  |          | -3.90072 |          |          |          |
| FOXC2   |          | -3.90175 |          |          |          |
| FOXG1   |          | -3.90175 |          |          |          |
| FOXL1   |          | -3.90175 |          |          |          |
| NEMF    |          | -3.90486 |          |          |          |
| ELAVL2  |          | -3.90543 |          |          |          |
| ELAVL4  |          | -3.90543 |          |          |          |
| RPL34   |          | -3.90934 |          |          |          |
| DACH2   |          | -3.91386 |          |          |          |
| HELLS   |          | -3.91615 |          |          |          |
| SUMO2   |          | -3.91762 |          |          |          |
| CD2BP2  |          | -3.92739 |          |          |          |
| LAMP1   | -3.93566 |          |          |          |          |
| PPHLN1  |          | -3.93576 |          |          |          |
| ADCK3   |          |          |          |          | -3.94006 |
| NDUFAF4 |          | -3.9432  |          |          |          |
| CNDP2   |          |          | -3.95345 |          |          |
| TMX1    |          | -3.9727  |          |          |          |
| SLC3A2  |          | -3.97392 |          |          |          |
| FDPS    |          |          | -3.97661 |          |          |
| MARCKS  |          | -3.99469 |          |          |          |
| NOP2    |          | -3.99496 |          |          |          |
| GMPPB   |          | -4.00627 |          |          |          |
| PCBP2   |          | -4.01707 |          |          |          |
| DACH1   |          | -4.01833 |          |          |          |
| RAB2A   |          |          | -4.02944 |          |          |
| MAX     |          | -4.03099 |          |          |          |
| NCAPG   |          | -4.03302 |          |          |          |
| APOOL   |          | -4.0333  |          |          |          |
| DKC1    |          | -4.04402 |          |          |          |
| ATP5D   |          | -4.05348 |          |          |          |
| CLUH    |          |          |          | -4.05892 |          |
| TUFM    |          | -4.06347 |          |          |          |
| TAF6    |          |          | -2.12199 | -1.94796 |          |
| MAGT1   |          | -4.08106 |          |          |          |
| GINS2   |          | -4.08285 |          |          |          |
| GNB1    |          | -4.09386 |          |          |          |
| NCAPH2  | -1.83997 |          | -2.2595  |          |          |
| RSL1D1  |          | -4.1026  |          |          |          |
| ARL8B   |          | -4.10319 |          |          |          |
| NUMA1   |          | -4.10964 |          |          |          |

|                |          |          |          |          |          |
|----------------|----------|----------|----------|----------|----------|
| CAMK2D         |          | -4.11135 |          |          |          |
| ST13           |          | -4.1207  |          |          |          |
| BAG3           |          | -4.13331 |          |          |          |
| CEP41          |          |          | -2.31975 | -1.81595 |          |
| STRBP          |          | -4.138   |          |          |          |
| BABAM1         |          |          |          | -2.07425 | -2.06585 |
| HMGA2          |          | -4.14123 |          |          |          |
| DKFZp434B2017  |          | -4.14403 |          |          |          |
| SAR1B          |          | -4.14403 |          |          |          |
| DTYMK          |          | -4.14683 |          |          |          |
| ATP6V1B1       |          | -4.15742 |          |          |          |
| KRR1           |          | -4.15838 |          |          |          |
| PSMB6          |          | -4.16094 |          |          |          |
| NDUFC2         |          | -4.16122 |          |          |          |
| SUMO3          |          | -4.16718 |          |          |          |
| SUCLA2         |          | -4.17274 |          |          |          |
| RHOA           |          | -4.17416 |          |          |          |
| RHOC           |          | -4.17416 |          |          |          |
| C7orf55-LUC7L2 |          |          |          | -2.05823 | -2.144   |
| RIOK1          |          | -4.20914 |          |          |          |
| RPS7           |          | -4.20932 |          |          |          |
| RPS26          |          | -4.21254 |          |          |          |
| RPS26P11       |          | -4.21254 |          |          |          |
| STARD9         |          | -4.21639 |          |          |          |
| TPT1P8         | -1.59298 |          | -2.63126 |          |          |
| CHMP4B         |          | -4.23058 |          |          |          |
| RPF2           |          | -4.23151 |          |          |          |
| SF3B1          |          | -4.23631 |          |          |          |
| PAF1           |          | -4.2384  |          |          |          |
| PPP5C          | -2.33335 |          | -1.90666 |          |          |
| PPP5D1         | -2.33335 |          | -1.90666 |          |          |
| GLTSCR2        |          | -4.2403  |          |          |          |
| KRAS           |          | -4.24032 |          |          |          |
| TARDBP         |          | -4.24187 |          |          |          |
| PDCL           |          |          |          | -4.2444  |          |
| RPL31          |          | -4.24767 |          |          |          |
| FBXO22         |          |          | -2.19836 | -2.0615  |          |
| DUSP9          | -4.26215 |          |          |          |          |
| DHCR7          |          | -4.26841 |          |          |          |
| RABGGTB        | -1.74383 |          |          |          | -2.54144 |
| RPS4X          |          | -4.29997 |          |          |          |
| RPL13          |          | -4.30034 |          |          |          |
| DYNC1H1        |          |          | -2.68134 | -1.62028 |          |
| MKLN1          | -4.30843 |          |          |          |          |
| DDX39A         |          | -4.30846 |          |          |          |



|          |          |          |          |          |          |
|----------|----------|----------|----------|----------|----------|
| HARS2    |          | -4.30991 |          |          |          |
| MRPL1    |          | -4.31086 |          |          |          |
| BLM      |          | -4.32585 |          |          |          |
| RECQL    |          | -4.32585 |          |          |          |
| KIAA1429 |          | -4.32936 |          |          |          |
| RPL29    |          | -4.33445 |          |          |          |
| PELP1    |          | -4.33547 |          |          |          |
| PCYOX1   | -1.9126  |          |          | -2.42877 |          |
| SNRPF    |          | -4.34219 |          |          |          |
| ARHGAP17 |          |          |          | -4.34453 |          |
| HACD3    |          |          | -2.22003 | -2.12692 |          |
| RPL23    |          | -4.35232 |          |          |          |
| VPS53    |          |          | -4.35441 |          |          |
| PDIA4    |          | -4.35543 |          |          |          |
| ALG5     |          |          |          | -4.35789 |          |
| SMC1A    |          | -4.35939 |          |          |          |
| UHRF2    |          | -4.36837 |          |          |          |
| WNK1     |          | -4.37825 |          |          |          |
| WDR89    |          | -4.37898 |          |          |          |
| MECR     |          | -4.38051 |          |          |          |
| MEN1     |          | -4.38629 |          |          |          |
| UTP11L   |          | -4.42287 |          |          |          |
| ECH1     | -2.39458 |          |          | -2.03307 |          |
| 40787    |          | -4.43311 |          |          |          |
| CMTR1    | -1.70667 |          | -2.72667 |          |          |
| C1orf131 |          |          | -2.1067  | -2.33745 |          |
| WDR18    |          | -4.44914 |          |          |          |
| MCM2     | -4.4692  |          |          |          |          |
| NDUFS6   |          | -4.47477 |          |          |          |
| THOC3    |          | -4.48021 |          |          |          |
| SPCS2    |          | -4.48593 |          |          |          |
| STMN1    | -1.9903  |          | -2.4957  |          |          |
| COPB2    |          |          | -1.98277 | -2.50439 |          |
| BZW1     |          |          | -2.42891 |          | -2.05958 |
| 39692    |          |          | -4.49969 |          |          |
| SMPD4    |          | -4.50008 |          |          |          |
| C11orf98 |          | -4.50023 |          |          |          |
| RBM39    |          | -4.50104 |          |          |          |
| MRPL34   |          | -4.50409 |          |          |          |
| HM13     |          | -4.50811 |          |          |          |
| HP1BP3   |          | -4.50836 |          |          |          |
| HDLBP    |          |          | -4.52934 |          |          |
| HECTD1   | -4.53146 |          |          |          |          |
| ETFA     |          | -4.53205 |          |          |          |
| HOXA5    |          | -4.53348 |          |          |          |

|          |          |          |          |          |          |
|----------|----------|----------|----------|----------|----------|
| AAMP     |          |          |          | -1.84889 | -2.69083 |
| ANKLE2   |          | -4.54385 |          |          |          |
| CTPS2    |          | -4.54411 |          |          |          |
| AMOTL2   |          | -4.54886 |          |          |          |
| IMPDH1   |          | -4.54991 |          |          |          |
| RAP2A    |          | -4.55093 |          |          |          |
| RAP2B    |          | -4.55093 |          |          |          |
| RAP2C    |          | -4.55093 |          |          |          |
| DVL2     | -2.15304 |          | -2.4129  |          |          |
| RFC4     |          | -4.56736 |          |          |          |
| AIMP1    | -2.25539 |          | -2.31634 |          |          |
| PPT1     | -2.07039 |          |          |          | -2.5019  |
| KPNB1    |          | -4.57287 |          |          |          |
| CUL3     |          | -4.57677 |          |          |          |
| RAB25    |          | -4.57789 |          |          |          |
| ANAPC5   |          | -4.5823  |          |          |          |
| DMAP1    |          | -4.58421 |          |          |          |
| GCN1L1   | -2.33777 |          | -2.24706 |          |          |
| GAPDH    |          |          | -2.02558 | -2.56521 |          |
| POLR1B   |          | -4.594   |          |          |          |
| TSFM     |          |          | -4.59536 |          |          |
| DPYSL5   |          | -4.59576 |          |          |          |
| THUMPD3  |          | -4.59677 |          |          |          |
| PNPT1    |          | -4.59733 |          |          |          |
| DEGS1    |          |          |          |          | -4.61022 |
| CLGN     |          |          | -4.61398 |          |          |
| EIF4G3   |          |          | -4.61573 |          |          |
| SF3A2    |          | -4.62194 |          |          |          |
| CTBP2    |          | -4.62534 |          |          |          |
| SRPK3    |          | -4.63375 |          |          |          |
| SNRPA    |          | -4.64338 |          |          |          |
| ARPC3    |          | -4.65029 |          |          |          |
| CHD1     |          | -4.65099 |          |          |          |
| GHITM    |          |          |          | -2.38453 | -2.2668  |
| HSP90B2P |          | -4.66243 |          |          |          |
| POLR2G   |          |          |          | -2.07974 | -2.5859  |
| ACTR3B   |          | -4.67257 |          |          |          |
| AKR1B15  |          | -4.68028 |          |          |          |
| KPNA3    |          | -4.6915  |          |          |          |
| KPNA4    |          | -4.6915  |          |          |          |
| NDUFB11  |          | -4.69716 |          |          |          |
| KIF5A    |          | -4.6985  |          |          |          |
| KIF5C    |          | -4.6985  |          |          |          |
| PDS5A    |          | -4.70084 |          |          |          |
| GNB3     |          | -4.70233 |          |          |          |

|          |          |          |          |          |          |
|----------|----------|----------|----------|----------|----------|
| GNB4     |          | -4.70233 |          |          |          |
| TUBB4B   |          |          | -2.56464 | -2.13838 |          |
| RPA2     |          | -4.70762 |          |          |          |
| CTH      |          | -4.71204 |          |          |          |
| MATR3    |          | -4.71838 |          |          |          |
| DDX3Y    |          | -4.73052 |          |          |          |
| CNOT1    |          |          | -4.7443  |          |          |
| PES1     |          | -4.74698 |          |          |          |
| NIN      |          | -4.75102 |          |          |          |
| CALCOCO2 |          |          | -4.75649 |          |          |
| POR      |          | -4.75861 |          |          |          |
| MYO1D    |          | -4.7727  |          |          |          |
| PICALM   |          | -4.77503 |          |          |          |
| LSM8     |          | -4.77841 |          |          |          |
| PNN      |          | -4.78213 |          |          |          |
| USP39    |          | -4.78456 |          |          |          |
| TEX10    |          | -4.7863  |          |          |          |
| ALB      | -2.73003 |          | -2.05899 |          |          |
| UFM1     |          | -4.78912 |          |          |          |
| RABIF    |          |          |          | -2.46588 | -2.33451 |
| TARS2    | -2.33506 |          | -2.47315 |          |          |
| RPL8     |          | -4.80848 |          |          |          |
| YBX3     | -2.74366 |          |          | -2.06569 |          |
| REXO2    |          | -4.81755 |          |          |          |
| CYB5B    | -2.81992 |          | -1.99823 |          |          |
| NCAPD2   |          | -4.82017 |          |          |          |
| LEPRE1   |          | -4.82532 |          |          |          |
| NOMO2    | -1.6223  |          |          | -3.21712 |          |
| ERH      |          | -4.84884 |          |          |          |
| ALDH7A1  | -2.66329 |          |          | -2.19558 |          |
| FAHD2A   | -2.2669  |          |          | -2.59539 |          |
| RBX1     |          | -4.86993 |          |          |          |
| EXOSC4   |          | -4.87591 |          |          |          |
| KAT7     |          |          | -2.65347 | -2.23367 |          |
| DIEXF    |          | -4.88866 |          |          |          |
| POLR2E   |          |          |          | -2.67606 | -2.21306 |
| PTGES3   |          | -4.88916 |          |          |          |
| SCP2     |          |          | -2.49781 | -2.39415 |          |
| SNW1     |          | -4.89732 |          |          |          |
| SP100    |          | -4.89926 |          |          |          |
| HCFC2    |          | -4.90101 |          |          |          |
| RAD23A   |          | -4.90182 |          |          |          |
| PHF5A    |          |          |          |          | -4.90469 |
| ARMC6    |          |          |          |          | -4.91041 |
| UBL5     |          | -4.91138 |          |          |          |

|               |          |          |          |          |          |
|---------------|----------|----------|----------|----------|----------|
| CD59          |          | -4.91396 |          |          |          |
| THOC1         | -2.11149 | -2.8038  |          |          |          |
| FAM3C         |          |          |          | -2.18272 | -2.73686 |
| SUMO1         |          |          |          | -2.3563  | -2.57072 |
| CLPTM1        |          | -2.50296 |          |          | -2.4306  |
| KLC1          |          | -4.93843 |          |          |          |
| DUS1L         |          |          | -4.94347 |          |          |
| WBP11         |          |          |          | -2.37605 | -2.56994 |
| ATXN2L        | -2.08421 |          |          |          | -2.86772 |
| YY1           |          | -4.9533  |          |          |          |
| SNRPC         |          | -4.97465 |          |          |          |
| HEATR6        |          |          | -2.91466 |          | -2.0729  |
| DKFZp686E0752 | -2.86777 |          |          | -2.12242 |          |
| RSF1          |          |          |          | -3.04494 | -1.94852 |
| PPIL1         |          |          |          | -2.60748 | -2.4619  |
| MAPK8IP3      |          |          | -5.07467 |          |          |
| RPS23         |          |          | -3.05825 | -2.07181 |          |
| HIST2H2AA3    |          | -5.15158 |          |          |          |
| HIST2H2AC     |          | -5.15158 |          |          |          |
| PSMA6         |          |          | -2.72663 | -2.43483 |          |
| AP2M1         | -3.19158 |          | -2.01803 |          |          |
| CDSN          |          |          | -5.28789 |          |          |
| SLC1A5        | -1.64313 |          | -3.6626  |          |          |
| RPL19         |          |          | -2.17058 | -3.13779 |          |
| RRS1          |          |          | -2.87846 | -2.44128 |          |
| CADM1         | -1.7068  |          | -3.61404 |          |          |
| DBT           | -2.00068 | -3.32128 |          |          |          |
| BMS1          | -2.85731 |          | -2.47589 |          |          |
| MCM4          |          |          |          | -2.07439 | -3.27649 |
| XPO1          |          | -3.18305 |          |          | -2.21806 |
| IARS          |          | -3.41016 |          | -2.02828 |          |
| PYCR2         |          |          |          | -2.4777  | -3.00706 |
| PRPF31        | -2.02676 | -3.48579 |          |          |          |
| KIAA0101      |          |          | -5.53152 |          |          |
| UBE3A         |          |          |          | -5.56192 |          |
| USP14         |          |          |          |          | -5.56857 |
| ACLY          | -2.77196 |          | -2.80471 |          |          |
| STAU2         |          | -2.49433 | -3.13367 |          |          |
| FKBP1A        | -3.57973 |          |          | -2.06275 |          |
| H3F3C         |          | -3.5235  |          | -2.12512 |          |
| APIP          | -5.66092 |          |          |          |          |
| SLC39A7       |          | -2.48208 | -3.18378 |          |          |
| TNKS1BP1      | -5.6726  |          |          |          |          |
| DUSP3         | -2.64822 |          |          |          | -3.02996 |
| EFTUD2        | -1.91489 |          |          | -1.63057 | -2.1464  |

|            |          |          |          |          |          |
|------------|----------|----------|----------|----------|----------|
| HIST2H3PS2 |          | -3.56135 |          | -2.16159 |          |
| ATXN10     | -1.78596 |          | -1.99029 |          | -1.9654  |
| ATF1       |          | -2.54284 | -3.19949 |          |          |
| CREB1      |          | -2.54284 | -3.19949 |          |          |
| CREM       |          | -2.54284 | -3.19949 |          |          |
| TUBA1C     |          | -3.08797 |          | -2.68811 |          |
| POLR2F     |          |          |          | -2.9935  | -2.78556 |
| EIF3D      |          |          | -2.89    | -2.89695 |          |
| MMTAG2     | -1.68289 | -4.12731 |          |          |          |
| COMMD6     |          |          | -5.81204 |          |          |
| SLC19A1    |          | -2.69573 | -3.12034 |          |          |
| CASC5      | -5.8261  |          |          |          |          |
| ARF1       |          |          | -2.69992 | -3.14567 |          |
| EPHA2      |          |          | -2.75417 | -3.11998 |          |
| RPL26      | -2.68106 |          | -3.22418 |          |          |
| SPCS1      |          |          |          |          | -5.90688 |
| BRD8       |          | -2.63529 | -3.27649 |          |          |
| NUP62      |          |          |          | -2.31662 | -3.60256 |
| ARG1       |          |          | -3.21918 | -2.7248  |          |
| TP53BP1    |          |          |          |          | -5.94788 |
| LARS       | -2.4397  |          | -3.51071 |          |          |
| RUVBL2     | -1.96323 |          |          |          | -3.99436 |
| TP53       |          | -3.89935 |          | -2.07043 |          |
| BCLAF1     |          | -3.20723 | -2.7887  |          |          |
| ARF6       |          |          | -2.56111 | -3.45671 |          |
| HMGN3      |          |          |          | -2.61699 | -3.42233 |
| IGF2R      |          | -3.87918 |          | -2.18229 |          |
| DNTTIP2    |          | -2.92574 | -3.17887 |          |          |
| MAP1B      |          | -4.37975 |          | -1.73794 |          |
| PGM2       |          |          | -3.7279  |          | -2.39205 |
| NCAPH      |          |          |          |          | -6.13811 |
| UBXN4      |          | -2.81945 | -3.33139 |          |          |
| YBX1       |          |          |          | -4.12224 | -2.03098 |
| SSU72      |          | -2.75194 | -3.4141  |          |          |
| SURF4      |          | -3.35777 |          | -2.81766 |          |
| IGF2BP3    | -1.62726 | -4.55308 |          |          |          |
| HAX1       |          | -4.04581 |          | -2.13581 |          |
| KIAA0415   |          | -6.19186 |          |          |          |
| TBRG4      |          | -6.20699 |          |          |          |
| DDX46      |          | -3.39499 | -2.82115 |          |          |
| GRB2       |          | -4.11996 |          |          | -2.09876 |
| TALDO1     |          |          | -4.04156 | -2.19023 |          |
| HSP90B1    |          | -4.18381 |          | -2.06155 |          |
| WBP2       |          |          | -1.90798 | -2.27402 | -2.07031 |
| GBF1       |          |          | -6.2616  |          |          |

|              |          |          |          |          |          |
|--------------|----------|----------|----------|----------|----------|
| LLGL1        |          |          | -6.26829 |          |          |
| FOXK1        |          | -6.27134 |          |          |          |
| PRPH         | -2.25491 |          | -2.13499 | -1.88298 |          |
| HNRNPD       |          | -3.11219 |          |          | -3.17615 |
| TPM3         |          | -6.2907  |          |          |          |
| IMPDH2       |          |          | -3.99412 | -2.30186 |          |
| LBR          |          | -4.25659 |          | -2.06485 |          |
| DKFZp586I031 | -1.73296 | -4.60639 |          |          |          |
| PNP          |          |          | -2.10191 | -2.05808 | -2.19873 |
| C12orf43     |          | -3.5816  |          | -2.78515 |          |
| STMN3        |          |          | -6.38517 |          |          |
| VIM          | -1.98481 |          | -2.30395 | -2.10661 |          |
| CTDSPL2      | -1.75362 |          | -4.64741 |          |          |
| UBR7         |          | -4.24704 |          |          | -2.16714 |
| PRRC2A       |          | -2.85792 | -3.5603  |          |          |
| SMC6         |          | -2.81204 | -3.61219 |          |          |
| RPS2         |          |          | -1.90566 | -2.55842 | -1.96352 |
| PSMC5        | -2.45609 | -3.97963 |          |          |          |
| WFS1         |          | -4.48343 | -1.96365 |          |          |
| CTR9         |          | -2.8666  | -3.58104 |          |          |
| HCCS         | -4.24395 |          | -2.21337 |          |          |
| RPS15        |          | -4.31127 |          |          | -2.14704 |
| STIM2        | -1.77339 | -4.69229 |          |          |          |
| MYL6         |          | -4.42517 | -2.05638 |          |          |
| PTRH2        |          |          | -3.38068 |          | -3.10879 |
| PSMA2        |          |          | -2.82485 | -3.68476 |          |
| SEC23A       |          | -2.89402 | -3.63712 |          |          |
| VPS25        | -1.66645 |          | -2.10018 |          | -2.76463 |
| RPS27L       |          | -4.68014 |          | -1.85918 |          |
| CD99         | -2.20646 | -4.33527 |          |          |          |
| TUBB2B       |          |          |          | -2.53882 | -4.01458 |
| STAU1        |          | -3.48621 | -3.13367 |          |          |
| TRAP1        |          |          | -6.62576 |          |          |
| MTA3         |          | -4.47199 |          | -2.17643 |          |
| DES          | -1.61197 |          | -2.66424 | -2.38222 |          |
| PSIP1        |          | -3.50772 |          |          | -3.15175 |
| MRPL22       |          | -3.29908 |          |          | -3.36935 |
| PRMT5        | -3.6271  | -3.087   |          |          |          |
| AP1M2        |          |          | -6.72004 |          |          |
| RPL36        |          | -3.59391 |          |          | -3.14444 |
| CSNK2A2      |          | -3.70084 |          |          | -3.04023 |
| LTF          |          |          | -3.71124 |          | -3.06105 |
| DBN1         |          | -4.96934 |          | -1.80413 |          |
| FKBP5        | -3.09271 |          | -3.69492 |          |          |
| PRPF40A      |          | -4.83092 | -1.96283 |          |          |

|          |          |          |          |          |          |
|----------|----------|----------|----------|----------|----------|
| PSMA4    |          | -3.16962 |          | -3.62694 |          |
| AGPAT9   |          |          |          | -2.41722 | -4.38844 |
| NAA40    |          | -3.06197 | -3.75137 |          |          |
| HMGCS1   |          | -3.3449  |          |          | -3.47501 |
| PSMA1    |          | -3.17344 | -3.65412 |          |          |
| GNG12    |          | -3.39531 | -3.44012 |          |          |
| MLLT4    | -2.15711 | -4.68545 |          |          |          |
| GEMIN4   |          | -6.8668  |          |          |          |
| PEPD     |          | -3.16862 | -3.7052  |          |          |
| SNX17    |          |          | -3.13903 | -3.76    |          |
| WDR43    |          | -3.42906 |          |          | -3.47083 |
| KRT16    |          | -6.92303 |          |          |          |
| EIF4B    |          | -4.27218 |          |          | -2.65227 |
| IMMT     |          | -4.91601 | -2.01205 |          |          |
| BCAP31   | -2.26236 |          | -2.98617 |          | -1.7062  |
| CLTA     |          | -4.49596 | -2.45955 |          |          |
| DDX4     |          | -4.91032 |          | -2.10313 |          |
| ACTBL2   |          |          |          | -3.57095 | -3.44733 |
| RPL37A   |          | -5.01253 |          |          | -2.03255 |
| TTC19    |          |          | -2.49252 | -2.59786 | -1.96251 |
| MAZ      | -2.14309 |          |          | -3.19739 | -1.71643 |
| RPS24    | -2.2408  |          |          | -2.70242 | -2.11956 |
| ABCF1    | -2.11633 |          |          | -2.50547 | -2.5132  |
| HMGN4    |          | -3.94744 |          |          | -3.25572 |
| CPNE1    |          | -3.72216 | -3.48592 |          |          |
| IST1     |          | -3.30526 | -3.92534 |          |          |
| STUB1    | -4.15864 | -3.07293 |          |          |          |
| LIG1     | -2.59695 |          | -2.63314 |          | -2.05609 |
| PRPSAP2  |          |          | -3.49004 | -1.97091 | -1.82715 |
| AGAP3    |          | -7.30807 |          |          |          |
| RCN2     |          | -3.719   | -3.63816 |          |          |
| LCP1     | -4.06945 | -3.29955 |          |          |          |
| RPL37AP8 | -2.38996 | -4.98825 |          |          |          |
| NUDT19   |          |          | -3.96908 |          | -3.4135  |
| DRG1     |          |          |          | -5.52718 | -1.88224 |
| IDH1     | -3.3467  |          | -4.07365 |          |          |
| LMAN1    |          |          | -7.43399 |          |          |
| IDH3A    |          | -4.44182 | -3.01348 |          |          |
| GLRX5    | -2.24875 |          | -3.2112  |          | -1.9961  |
| OGFR     | -3.77385 |          |          | -3.68489 |          |
| EZH2     | -2.5748  | -4.89205 |          |          |          |
| CTCFL    |          | -4.68022 | -2.79005 |          |          |
| NDUFA2   |          |          | -4.923   |          | -2.54815 |
| SRRM2    |          | -3.3061  | -2.31777 | -1.85505 |          |
| CKAP2    |          | -4.47804 | -3.02743 |          |          |

|           |          |          |          |          |          |
|-----------|----------|----------|----------|----------|----------|
| PHPT1     |          |          | -3.66874 | -3.84566 |          |
| YY2       |          | -4.94744 | -2.57507 |          |          |
| WARS      |          | -4.89843 | -2.63118 |          |          |
| EIF4G1    | -3.15117 |          | -2.21606 | -2.20032 |          |
| SNX5      | -2.37434 |          | -2.64313 | -2.55127 |          |
| C4orf27   |          |          | -4.1438  |          | -3.43672 |
| SRP68     | -3.78651 | -3.79622 |          |          |          |
| MRPS28    |          |          | -2.18607 | -2.68523 | -2.75681 |
| UBR4      | -3.13122 |          | -2.48306 | -2.02164 |          |
| RPL30     |          | -4.86955 | -2.76793 |          |          |
| PRPF19    |          | -3.04747 | -2.13839 | -2.46801 |          |
| WDR33     |          | -4.14479 | -3.50948 |          |          |
| SRPRB     |          | -4.15589 |          |          | -3.50606 |
| EIF3G     |          | -3.36551 | -4.30225 |          |          |
| RPL10     |          | -3.47466 | -4.22545 |          |          |
| METAP1    |          | -4.45492 |          | -3.25451 |          |
| CNBP      |          | -3.15136 |          | -1.97395 | -2.58908 |
| NOLC1     |          | -2.60632 | -3.15028 | -1.96363 |          |
| RAVER1    |          | -2.94495 | -4.79086 |          |          |
| EIF4G2    |          | -3.51698 |          | -4.25063 |          |
| NASP      |          | -3.1187  | -2.55667 | -2.11977 |          |
| SRP54     | -2.7101  | -2.43348 | -2.65692 |          |          |
| NCL       |          | -4.88912 | -2.94944 |          |          |
| SRP19     | -2.17421 | -5.68217 |          |          |          |
| USP5      | -4.23363 | -3.63461 |          |          |          |
| EIF4A3    |          | -4.88278 | -2.98695 |          |          |
| HOXB9     |          | -3.35205 | -4.52173 |          |          |
| RBMX      |          | -4.57954 | -3.37472 |          |          |
| PTRHD1    | -2.33547 |          | -1.9096  | -1.83947 | -1.90301 |
| CBX1      |          | -5.21183 |          |          | -2.7781  |
| PLRG1     |          | -4.83618 |          |          | -3.20582 |
| NOMO1     | -2.18268 | -2.67801 | -3.19347 |          |          |
| CTAGE15   |          |          |          | -3.58782 | -4.47776 |
| CTAGE5    |          |          |          | -3.58782 | -4.47776 |
| CTAGE6    |          |          |          | -3.58782 | -4.47776 |
| TAF15     |          | -4.19254 |          |          | -3.99674 |
| APMAP     | -2.33044 |          | -3.81224 | -2.10491 |          |
| CPT1A     | -2.18924 |          | -6.06365 |          |          |
| PBK       | -2.44687 |          |          | -2.77982 | -3.05143 |
| MCCC2     | -3.11452 |          | -3.21069 | -1.96365 |          |
| MCM5      |          |          | -2.34014 | -6.00743 |          |
| MPHOSPH10 |          | -8.36237 |          |          |          |
| CDC42     |          | -3.45373 | -1.93861 | -3.0633  |          |
| HNRNPM    |          | -3.69601 |          | -2.69068 | -2.1229  |
| RQCD1     | -2.60985 |          | -2.47862 | -3.42139 |          |



|          |          |          |          |          |          |
|----------|----------|----------|----------|----------|----------|
| IDH2     |          | -4.70592 | -3.82614 |          |          |
| CTU1     |          |          | -4.31381 | -4.26613 |          |
| TRA2B    |          | -4.77632 | -3.81167 |          |          |
| CNN3     |          | -3.57681 |          | -2.25604 | -2.83736 |
| RUFY2    | -2.71467 |          | -4.30194 | -1.72434 |          |
| TSSC1    |          |          |          | -4.17522 | -4.60569 |
| NOL11    |          | -3.26638 |          | -2.05178 | -3.49127 |
| PSMD12   |          |          | -2.64917 | -6.20851 |          |
| PPP6R3   | -4.66827 |          | -4.19324 |          |          |
| ALDH2    | -2.33637 | -4.41162 |          | -2.14713 |          |
| RAB1B    |          | -4.65953 | -2.18092 |          | -2.09605 |
| MTCH1    |          |          | -2.18375 | -3.48679 | -3.27149 |
| POR      | -1.81961 | -3.25148 | -3.92775 |          |          |
| LONP1    | -3.83915 |          |          | -2.54906 | -2.61854 |
| MIA3     | -3.65132 |          |          |          | -5.36818 |
| MDN1     | -2.56547 |          | -3.06559 | -3.39707 |          |
| SF1      | -2.05474 | -4.69558 | -2.28328 |          |          |
| ECI2     |          |          |          | -5.24312 | -3.87416 |
| GOLGA2   |          | -3.60266 | -5.5469  |          |          |
| TES      |          |          |          | -3.89731 | -5.2811  |
| BLVRB    | -2.98371 |          | -2.34786 | -3.90642 |          |
| SEC31A   |          | -3.27515 |          | -5.99776 |          |
| LSM4     |          | -4.12838 |          | -2.45591 | -2.69135 |
| ZC3H7A   |          | -4.89656 | -4.49299 |          |          |
| ZC3H7B   |          | -4.89656 | -4.49299 |          |          |
| GNG5     | -1.6705  | -3.51748 | -4.27021 |          |          |
| KLF12    |          | -4.98045 |          |          | -4.49282 |
| KLF3     |          | -4.98045 |          |          | -4.49282 |
| KLF5     |          | -4.98045 |          |          | -4.49282 |
| KLF7     |          | -4.98045 |          |          | -4.49282 |
| MYNN     |          | -4.98045 |          |          | -4.49282 |
| ZSCAN16  |          | -4.98045 |          |          | -4.49282 |
| ZSCAN2   |          | -4.98045 |          |          | -4.49282 |
| ATP1A1   |          | -3.84389 |          | -2.45889 | -3.18599 |
| VEZF1    |          | -5.17099 |          |          | -4.41785 |
| FANCI    |          | -3.39482 | -2.12464 | -1.93601 | -2.18894 |
| UBA52    |          | -4.53541 |          | -5.14893 |          |
| RPS3     | -2.01822 | -2.55162 | -3.55774 | -1.56856 |          |
| GLG1     | -1.89069 | -3.92503 | -3.916   |          |          |
| HYPK     |          |          | -2.36668 | -3.75753 | -3.61602 |
| EPHA1    |          | -5.85843 |          |          | -3.92295 |
| HIST1H1C |          | -4.9117  |          |          | -4.89486 |
| STT3B    |          | -3.58404 |          | -2.84638 | -3.39842 |
| MRPS2    |          | -3.96438 | -2.35695 |          | -3.52165 |
| HINT2    | -1.64731 | -3.33558 | -4.86458 |          |          |

|         |          |          |          |          |          |
|---------|----------|----------|----------|----------|----------|
| RAE1    | -2.294   |          | -4.54597 | -3.01205 |          |
| TBCA    |          | -4.52328 |          | -2.49885 | -2.86716 |
| MAGOHB  |          |          | -5.15879 | -4.81772 |          |
| JAGN1   | -1.76587 | -3.2846  | -5.01074 |          |          |
| HAUS5   |          |          | -5.00363 | -5.11961 |          |
| HRNR    | -1.71872 | -4.44977 | -3.99967 |          |          |
| HDAC3   |          | -4.78826 |          | -2.79245 | -2.63155 |
| OPA1    | -1.95731 | -2.98096 | -3.84387 | -1.4548  |          |
| EIF3L   |          | -3.27529 | -2.32363 | -4.66606 |          |
| TUBA1B  |          | -3.84488 |          | -3.32749 | -3.12603 |
| NFKB1   | -2.38713 | -4.68233 | -3.24169 |          |          |
| NUP214  | -1.68229 | -4.20825 |          |          | -4.42111 |
| AHI1    | -4.09986 |          | -2.72808 | -3.48705 |          |
| CTCF    |          | -4.8681  | -3.24057 | -2.21565 |          |
| UQCRHL  |          | -4.96787 | -5.36534 |          |          |
| MSH6    | -3.1869  |          | -3.83339 |          | -3.34302 |
| TXNRD2  | -2.67099 |          | -2.82549 | -2.3184  | -2.57116 |
| PPP2CB  | -3.02403 |          | -2.20384 | -2.32244 | -2.86148 |
| TKT     |          | -4.78226 | -3.45294 | -2.20249 |          |
| CKMT2   | -7.31166 | -3.13142 |          |          |          |
| BTF3    |          | -4.52325 | -2.23324 | -3.69326 |          |
| CCDC88A | -1.92896 | -3.70426 | -4.82441 |          |          |
| DCTN1   | -3.68118 |          | -2.08564 | -2.54467 | -2.16343 |
| NUDT4   | -3.35216 |          | -3.71012 | -3.47625 |          |
| MRPL45  |          | -4.72601 |          | -3.02012 | -2.8789  |
| PTPN1   | -2.41264 |          | -6.11431 | -2.10032 |          |
| PRPF3   | -1.64692 | -3.75091 | -5.24415 |          |          |
| RRP1    | -1.81888 | -4.05443 | -4.83157 |          |          |
| SPC24   | -3.18572 |          | -2.63221 | -2.65616 | -2.26324 |
| PRRC2B  | -5.33384 |          | -5.41079 |          |          |
| TRAFD1  | -4.65776 |          | -6.09701 |          |          |
| ARF4    |          | -3.89356 | -3.36684 |          | -3.50419 |
| PQBP1   |          | -3.5691  | -3.19545 | -4.01847 |          |
| QRSL1   |          | -4.83718 |          | -3.0823  | -2.87874 |
| MECP2   | -1.65892 | -2.9638  | -3.79068 |          | -2.40192 |
| PPAN    | -2.24208 | -4.23519 |          |          | -4.33856 |
| PRPF8   |          | -4.69843 |          | -3.06528 | -3.05385 |
| GIGYF2  | -5.23002 |          | -5.59673 |          |          |
| CLIP1   | -5.52272 |          | -5.39031 |          |          |
| H2AFY2  |          | -3.33639 |          | -2.34605 | -5.30917 |
| MORF4L2 | -1.70126 | -3.85077 | -5.46515 |          |          |
| EEF1D   | -3.18076 | -4.22798 | -3.63028 |          |          |
| BRD2    |          | -4.92208 | -1.99984 | -2.07824 | -2.07841 |
| RBBP7   | -1.96283 | -4.50157 | -4.67233 |          |          |
| LIN28B  | -1.99355 | -4.2553  | -4.92341 |          |          |

|          |          |          |          |          |          |
|----------|----------|----------|----------|----------|----------|
| EIF3K    |          | -4.64853 | -4.06543 |          | -2.48863 |
| NPLOC4   |          | -4.82177 |          | -6.45841 |          |
| FSCN1    | -1.74446 | -2.76885 | -1.97186 | -2.95836 | -1.85797 |
| AK4      | -2.97859 |          | -4.88446 | -3.4413  |          |
| MAEA     | -6.3216  |          | -5.08716 |          |          |
| H1FO     | -2.29637 | -4.06689 | -5.08023 |          |          |
| DNAJA2   | -2.16084 | -2.8405  | -3.11171 | -3.41109 |          |
| CCDC40   | -2.79399 |          | -4.36784 | -4.37256 |          |
| ME3      | -2.76386 |          | -3.08055 | -2.54698 | -3.14328 |
| ZFP91    |          | -4.0916  | -3.78816 | -3.68301 |          |
| PRPS2    | -4.44689 |          | -3.87921 | -3.26656 |          |
| CTNNA2   | -6.41266 |          | -2.42278 | -2.80351 |          |
| SAP18    | -1.76106 | -3.69719 | -4.28512 | -1.93191 |          |
| TCOF1    | -2.52958 | -4.72993 | -4.43958 |          |          |
| GPI      | -4.13662 | -3.30016 | -4.39904 |          |          |
| ARFIP2   | -1.52336 | -4.24947 | -2.01632 | -1.80654 | -2.31031 |
| CEBPZ    | -3.38903 | -4.01362 | -4.52096 |          |          |
| GFAP     | -2.56903 | -4.53128 |          |          | -4.93394 |
| PRPS1    | -4.5759  | -4.57822 |          |          | -2.88845 |
| SRA1     | -4.82263 |          | -7.28302 |          |          |
| FMR1     |          | -4.95257 |          | -2.53209 | -4.71424 |
| PPP1CB   | -3.42358 | -4.65436 | -4.42937 |          |          |
| SRFBP1   | -1.98805 | -3.34978 | -7.29198 |          |          |
| HSPB1    |          |          | -4.73576 | -4.36162 | -3.8192  |
| EEF1E1   |          | -6.86054 |          |          | -6.06483 |
| H3F3B    |          | -6.76445 |          | -4.24893 | -1.92272 |
| SEC23B   | -4.18584 |          | -2.82511 | -5.95474 |          |
| SND1     | -2.71156 | -4.81229 | -5.49595 |          |          |
| COASY    |          |          | -4.54123 | -4.47389 | -4.10802 |
| CNNM3    | -4.16759 |          | -4.94109 |          | -4.09574 |
| HIST2H3A |          | -6.64183 | -2.20666 | -4.39613 |          |
| COX6B1   | -2.10898 | -4.96415 | -4.38356 | -1.8648  |          |
| COPS7B   | -2.27656 | -3.36173 | -2.5223  | -2.48199 | -2.72831 |
| PGM3     | -2.49373 | -4.7844  | -3.32577 | -2.80093 |          |
| CANX     | -3.01042 | -4.67975 | -5.74233 |          |          |
| GLOD4    | -4.39466 |          | -4.95115 |          | -4.09903 |
| MMS19    | -5.22148 |          | -5.76786 |          | -2.45932 |
| RABGGTA  | -4.68242 |          | -4.35548 | -4.43311 |          |
| DDA1     |          | -3.66045 | -4.0701  | -3.04059 | -2.7321  |
| ACADM    |          |          | -4.351   | -4.66082 | -4.52815 |
| ACSS1    |          | -5.01948 | -3.97647 |          | -4.68342 |
| EEF1B2   | -4.87672 |          |          | -3.02157 | -5.90591 |
| MPI      | -5.76336 |          | -5.21043 | -2.96149 |          |
| ASF1B    | -3.65531 | -3.21335 | -3.26664 | -3.81284 |          |
| RDX      |          | -4.48743 | -3.93859 | -5.56478 |          |

|          |          |          |          |          |          |
|----------|----------|----------|----------|----------|----------|
| SAE1     | -2.19875 | -4.24549 | -4.93982 | -2.64291 |          |
| TUBB3    |          | -7.05714 | -7.00555 |          |          |
| TLN1     | -3.63884 | -3.06067 | -3.12949 | -4.33643 |          |
| PITRM1   |          | -3.53572 | -5.89462 | -4.7649  |          |
| ANKFY1   | -4.80386 |          | -4.51406 | -4.91232 |          |
| NIFK     | -4.20641 | -2.60795 | -3.10476 |          | -4.37299 |
| WDR26    | -3.12993 |          | -3.98745 | -3.7618  | -3.57455 |
| MGEA5    | -2.84603 | -3.48507 | -2.14835 | -2.38809 | -3.65902 |
| MRPS11   | -2.77407 |          | -2.97123 | -5.17664 | -3.66401 |
| M6PR     | -3.56131 |          | -3.51921 | -3.39562 | -4.16329 |
| H2AFX    |          | -6.62986 |          |          | -8.08532 |
| DCAF16   | -5.52875 |          | -4.54073 | -4.65581 |          |
| MRPS7    |          | -3.14333 | -3.63385 | -3.63196 | -4.34917 |
| ASNS     | -3.26016 | -3.08155 | -3.37231 | -2.27543 | -2.8064  |
| PUS7     | -5.16088 |          | -3.97028 | -5.66554 |          |
| GABPB1   | -3.47805 | -3.35808 | -2.18386 | -2.48375 | -3.35332 |
| BRAT1    | -5.56477 |          | -4.48034 | -4.81625 |          |
| INIP     | -4.27096 | -4.9338  | -5.69663 |          |          |
| SUCLG2   | -3.55896 | -3.9432  | -5.67396 |          | -1.7967  |
| LIMD1    | -4.68498 |          | -5.08561 | -5.2122  |          |
| VAR5     | -5.93881 | -4.2199  | -4.83735 |          |          |
| SRM      |          | -5.48838 | -2.14884 | -1.92881 | -5.55824 |
| BICD2    | -4.67942 |          | -5.56768 | -4.88815 |          |
| GLMN     | -1.81899 | -4.22006 | -2.30759 | -4.64907 | -2.24806 |
| H3F3A    |          | -6.76445 | -2.71014 | -4.24893 | -1.92272 |
| TIMM8B   | -3.98872 | -5.30694 | -6.35228 |          |          |
| ARHGEF2  | -4.53546 |          | -5.31077 | -5.82438 |          |
| RBM22    | -2.14895 | -5.78662 |          | -2.1559  | -5.59411 |
| TBC1D10A | -5.22328 |          | -5.20582 | -5.58217 |          |
| ERP44    | -2.89223 | -3.31769 | -4.16772 | -5.64274 |          |
| ARF3     |          | -4.22191 | -3.54668 | -4.73116 | -3.53436 |
| EPPK1    | -5.4896  | -3.04698 | -4.88533 | -2.70167 |          |
| LCMT1    | -5.21382 |          | -5.56951 | -5.42072 |          |
| CS       | -3.25118 | -3.54226 | -6.87837 | -2.5323  |          |
| KPNB1    |          | -8.46766 |          |          | -7.89599 |
| ARKL1    | -4.97984 |          | -5.85681 | -5.53419 |          |
| C18orf25 | -4.97984 |          | -5.85681 | -5.53419 |          |
| TMEM43   |          | -5.33729 | -4.5333  | -2.50588 | -4.02813 |
| SCRN1    | -4.59368 | -4.2047  | -3.76325 | -3.87301 |          |
| ARPP19   | -5.81093 |          | -6.06673 |          | -4.74266 |
| KARS     | -6.11055 | -4.55625 | -6.04847 |          |          |
| RDH13    | -3.98578 |          | -4.49534 | -4.0922  | -4.31779 |
| EBP      | -5.832   | -4.91765 | -6.21543 |          |          |
| RCCD1    | -5.78196 |          | -5.71506 | -5.51246 |          |
| GFPT2    | -3.50895 | -4.38267 | -2.97668 | -2.79141 | -3.40927 |

|         |          |          |          |          |          |
|---------|----------|----------|----------|----------|----------|
| PRPSAP1 | -5.64579 | -3.71109 | -3.31804 | -4.55715 |          |
| HNRNPH1 |          | -8.77373 |          |          | -8.47423 |
| RPS25   |          | -9.25642 |          |          | -8.20431 |
| BAX     | -3.32021 | -3.99552 | -2.55488 | -3.41644 | -4.22591 |
| ASMTL   | -5.75089 |          | -6.92835 |          | -5.04693 |
| UBE4A   | -6.07745 |          | -6.01091 | -5.68513 |          |
| ZMYM3   | -2.01258 | -7.44503 | -3.11302 | -2.37103 | -2.87086 |
| UBE2D2  | -4.78417 | -7.63231 | -5.6772  |          |          |
| LPCAT1  | -4.15719 |          | -4.33641 | -4.55881 | -5.23647 |
| TPP2    |          | -4.98151 | -4.10636 | -4.91478 | -4.48483 |
| SETBP1  | -4.96562 | -3.54104 | -3.67386 | -2.9208  | -3.42441 |
| LRBA    | -5.89315 |          | -6.6587  | -6.02414 |          |
| MARS    | -5.27435 | -6.04085 | -4.33166 | -3.00277 |          |
| MDC1    | -1.99005 | -4.15421 | -4.53817 | -3.85958 | -4.46956 |
| HMG2    | -2.09869 | -7.09145 | -5.01563 |          | -5.13983 |
| FOXK2   | -3.71763 | -7.63066 | -4.11425 | -3.92256 |          |
| HLA-B   | -3.64988 | -5.34063 | -2.8023  | -3.83091 | -3.83927 |
| HLA-C   | -3.64988 | -5.34063 | -2.8023  | -3.83091 | -3.83927 |
| PDCD4   | -4.523   |          | -5.51754 | -5.28284 | -4.8968  |
| RNMTL1  | -6.71739 | -6.38833 | -7.51742 |          |          |
| RPL27A  |          | -10.0358 |          | -2.10736 | -8.54864 |
| SMG9    | -4.10003 | -5.55353 | -3.34812 | -3.84959 | -3.92629 |
| FAF1    | -2.89307 | -6.4032  | -3.65202 | -3.2299  | -5.08432 |
| CASP3   | -3.6092  | -6.17586 | -3.73259 | -3.3312  | -4.87781 |
| RARA    | -3.94285 | -5.86028 | -3.90118 | -4.41347 | -3.91848 |
| GPKOW   | -4.74284 | -5.34473 | -5.16134 | -4.29502 | -4.04348 |
| TMEM180 |          | -7.20109 | -5.82679 | -6.75557 | -6.37137 |
