# Supplementary material for: GPR19 Coordinates Multiple Molecular Aspects of Stress Responses Associated with the Aging Process
Source: MDPI journal article supplement (doi:10.3390/ijms24108499), 2023-05-09
Supplement: s1 [file s1]

## **Data Supplement**

### **GPR19 coordinates multiple molecular aspects of stress responses associated with the aging process**

Stuart Maudsley<sup>1\*</sup>, Claudia Schrauwen<sup>1</sup>, İrem Harputluoğlu<sup>1</sup>, Deborah Walter<sup>1</sup>, Hanne Leysen<sup>1</sup>, Patricia McDonald<sup>2</sup>

1. Receptor Biology Lab, Department of Biomedical Science, University of Antwerp.
2. H. Lee Moffitt Cancer Center, Tampa, FL, USA

\* Corresponding Author: Prof. Stuart Maudsley – [stuartmaudsley@uantwerpen.be](mailto:stuartmaudsley@uantwerpen.be):  
[receptorbiologylab@gmail.com](mailto:receptorbiologylab@gmail.com)

**Table S6. MSigDB enrichment analysis of the total mean GPR19 perturbation response dataset.** For each significantly-enriched MSigDB category the nature of the enrichment (enriched or depleted) and the negative log10 of the enrichment probability (P) is shown.

| Type     | Category Name                                | $-\log_{10} P$ |
|----------|----------------------------------------------|----------------|
| enriched | PUJANA BRCA1 PCC NETWORK                     | 109.9878422    |
| enriched | DIAZ CHRONIC MEYLOGENOUS LEUKEMIA UP         | 96.02042431    |
| enriched | PUJANA CHEK2 PCC NETWORK                     | 74.31972886    |
| enriched | CAIRO HEPATOBLASTOMA CLASSES UP              | 64.26817119    |
| enriched | BLALOCK ALZHEIMERS DISEASE DN                | 60.37106675    |
| enriched | PILON KLF1 TARGETS DN                        | 53.25915275    |
| enriched | KRIGE RESPONSE TO TOSEDOSTAT 24HR DN         | 53.01761342    |
| enriched | LEE BMP2 TARGETS DN                          | 48.58381899    |
| enriched | DANG BOUND BY MYC                            | 48.01514653    |
| enriched | HSIAO HOUSEKEEPING GENES                     | 47.20091321    |
| depleted | DODD NASOPHARYNGEAL CARCINOMA UP             | -8.594991917   |
| depleted | FLORIO NEOCORTEX BASAL RADIAL GLIA UP        | -11.48977278   |
| depleted | PEREZ TP53 TARGETS                           | -11.69433914   |
| depleted | MEISSNER BRAIN HCP WITH H3K4ME3 AND H3K27ME3 | -12.26247182   |
| depleted | MIKKELSEN MEF HCP WITH H3K27ME3              | -13.44346111   |
| depleted | BENPORATH PRC2 TARGETS                       | -13.58275091   |
| depleted | BENPORATH SUZ12 TARGETS                      | -15.18727042   |
| depleted | MARTENS TRETINOIN RESPONSE UP                | -18.46239622   |
| depleted | BENPORATH ES WITH H3K27ME3                   | -20.31364173   |
| depleted | ZWANG TRANSIENTLY UP BY 2ND EGF PULSE ONLY   | -20.94223503   |
