# Supplementary material for: GPR19 Coordinates Multiple Molecular Aspects of Stress Responses Associated with the Aging Process
Source: MDPI journal article supplement (doi:10.3390/ijms24108499), 2023-05-09
Supplement: s1 [file s1]

## **Data Supplement**

### **GPR19 coordinates multiple molecular aspects of stress responses associated with the aging process**

Stuart Maudsley<sup>1\*</sup>, Claudia Schrauwen<sup>1</sup>, İrem Harputluoğlu<sup>1</sup>, Deborah Walter<sup>1</sup>, Hanne Leysen<sup>1</sup>, Patricia McDonald<sup>2</sup>

1. Receptor Biology Lab, Department of Biomedical Science, University of Antwerp.
2. H. Lee Moffitt Cancer Center, Tampa, FL, USA

\* Corresponding Author: Prof. Stuart Maudsley – [stuartmaudsley@uantwerpen.be](mailto:stuartmaudsley@uantwerpen.be):  
[receptorbiologylab@gmail.com](mailto:receptorbiologylab@gmail.com)

**Table S2. GPR19 induced protein expression alterations in the plasma membrane (CE2) compartment.** Significantly-regulated proteins (identified by official Gene Symbols) found in cells, differential between mock-transfection and the specific GPR19 expression level (0.5, 1, 2, 5, 10µg), are represented as a log2-transformed and normalized expression ratio between the specific GPR19 expression level and the expression level found in cells receiving empty vector transfection.

| Gene Symbol | CE2 0.5  | CE2 1    | CE2 2    | CE2 5    | CE2 10   |
|-------------|----------|----------|----------|----------|----------|
| RAD50       | 8.396166 | 7.69871  | 7.083238 | 6.343929 | 7.324503 |
| TACC3       | 5.255857 | 5.646168 | 5.230488 | 6.347601 | 4.998936 |
| PGM3        | 5.856697 | 5.963834 | 5.085445 | 5.101395 | 5.409277 |
| PDAP1       | 9.222202 | 8.955604 |          | 3.87075  | 4.442603 |
| DIABLO      | 5.956536 | 6.117558 | 6.896559 | 6.473151 |          |
| COLGALT1    | 4.255547 | 4.442226 | 4.261642 | 4.248381 | 4.5388   |
| UBA2        | 7.754652 |          | 6.813613 | 7.129645 |          |
| CLGN        |          | 7.256758 |          | 6.912912 | 7.304615 |
| RPS24       | 5.218748 | 5.433923 |          | 5.209906 | 5.444566 |
| FARSB       | 4.224168 | 4.234982 | 4.570312 | 3.002996 | 4.990068 |
| RTN3        | 2.830226 | 4.197738 | 3.638109 | 4.835835 | 4.50803  |
| MDC1        | 4.897054 | 3.58098  | 2.029585 | 5.436453 | 3.1684   |
| ETF1        | 4.890324 | 4.824556 | 5.130607 | 4.003568 |          |
| CCDC6       | 4.36654  | 2.398018 |          | 3.744082 | 8.004424 |
| DDX19A      | 5.441245 | 6.157138 |          |          | 6.622569 |
| NAA10       | 4.573187 | 5.639501 |          | 3.14981  | 4.746903 |
| GRB2        | 4.527323 | 4.485842 | 4.436292 |          | 4.659344 |
| KIAA1524    | 2.59011  | 4.156684 | 3.005384 | 4.310237 | 3.836749 |
| ANP32C      | 4.219499 | 4.218817 | 2.080707 | 2.471282 | 4.806223 |
| DCTN1       | 8.396502 |          | 2.100582 | 3.739887 | 3.223941 |
| GMPS        | 3.904269 | 4.159791 | 3.007207 | 2.588598 | 2.444054 |
| COPS4       | 3.806237 | 4.614148 |          | 2.947247 | 4.438288 |
| RIF1        | 8.395669 |          |          | 7.335939 |          |
| AHSA1       | 4.264408 | 6.039251 |          | 5.175856 |          |
| RRP9        | 3.0736   | 2.589998 | 3.621747 | 2.618888 | 3.381173 |
| LTA4H       | 2.815766 | 2.892392 | 3.123152 | 2.605819 | 3.758297 |
| BAG6        | 3.386025 | 4.516488 | 3.491089 | 3.374618 |          |
| TERF2       | 3.283414 | 4.624034 | 2.906634 | 3.870694 |          |
| NHP2        | 2.533864 | 2.560516 | 2.520298 | 3.648656 | 3.400519 |
| PSIP1       | 7.232805 |          |          |          | 7.136455 |
| SSU72       | 3.557537 | 3.097957 | 2.600004 | 2.923984 | 2.12216  |
| KRI1        | 4.524278 | 3.83669  |          | 2.507333 | 3.299088 |
| HN1         | 3.702839 | 3.502694 | 3.077645 |          | 3.847221 |
| RANBP3      | 3.265385 | 3.449178 | 2.209416 | 1.777415 | 3.281335 |
| ATIC        | 2.630077 | 2.766063 | 3.388891 | 2.269906 | 2.89886  |
| TPT1        | 3.144038 | 3.478618 | 2.276382 | 2.254789 | 2.753835 |
| PRPSAP2     | 3.077188 | 2.422165 | 2.700893 | 2.202787 | 3.381976 |

|         |          |          |          |          |          |
|---------|----------|----------|----------|----------|----------|
| HSPB1   | 8.395398 |          | 2.782095 | 2.552177 |          |
| EEA1    | 2.85673  | 2.62576  | 2.973406 | 2.73763  | 2.421728 |
| GPI     | 6.680979 | 6.906951 |          |          |          |
| KLF12   |          | 3.011002 | 2.833759 | 2.274424 | 5.329515 |
| KLF3    |          | 3.011002 | 2.833759 | 2.274424 | 5.329515 |
| KLF5    |          | 3.011002 | 2.833759 | 2.274424 | 5.329515 |
| KLF7    |          | 3.011002 | 2.833759 | 2.274424 | 5.329515 |
| MYNN    |          | 3.011002 | 2.833759 | 2.274424 | 5.329515 |
| ZKSCAN7 |          | 3.011002 | 2.833759 | 2.274424 | 5.329515 |
| ZSCAN16 |          | 3.011002 | 2.833759 | 2.274424 | 5.329515 |
| ZSCAN2  |          | 3.011002 | 2.833759 | 2.274424 | 5.329515 |
| ACTBL2  | 2.89498  |          | 3.911076 |          | 6.579158 |
| ABCF2   | 2.759438 | 2.598108 | 2.845067 | 2.699784 | 2.391323 |
| LSM14A  | 8.398797 |          | 1.642354 | 3.232209 |          |
| RPS10   | 1.36594  | 2.068691 | 2.635922 | 4.785406 | 2.155432 |
| ANP32A  | 2.807105 | 2.850172 | 2.17328  | 2.199548 | 2.798892 |
| MGEA5   | 2.911222 | 3.078775 | 1.826328 | 2.369549 | 2.559235 |
| PSMA3   | 2.017553 | 4.06889  | 3.505596 | 3.14588  |          |
| PGP     | 2.84083  | 2.91989  | 2.143372 | 1.975463 | 2.667839 |
| STMN4   | 8.396872 |          | 1.458049 | 2.606697 |          |
| NSF     |          | 4.198847 |          | 4.490125 | 3.667606 |
| REXO4   | 8.399349 | 3.744074 |          |          |          |
| BLVRA   | 3.132613 | 3.233212 |          | 2.617496 | 3.08048  |
| HDAC2   | 8.395493 | 3.665376 |          |          |          |
| NPEPPS  | 3.345038 | 3.752324 | 2.212608 | 2.704853 |          |
| CHCHD4  |          | 3.589819 |          | 4.102385 | 4.160435 |
| WDR6    | 2.815243 | 3.816346 | 2.16487  | 2.989692 |          |
| MSH6    | 2.762846 | 2.957977 | 2.896963 |          | 3.017527 |
| CTTN    |          |          | 2.866922 | 4.860484 | 3.817058 |
| CUL4B   | 3.154114 | 3.013078 |          | 2.628965 | 2.710734 |
| DDX51   |          |          |          | 6.285229 | 5.18558  |
| FLNB    | 2.663663 | 2.754046 | 1.543499 | 1.975149 | 2.407077 |
| EIF4A1  | 2.112437 | 2.434614 | 2.537098 | 1.611386 | 2.6457   |
| TMSB10  | 2.358047 | 3.15616  |          | 2.113698 | 3.636859 |
| ATAD1   | 8.39645  |          |          | 2.62197  |          |
| NUDT5   | 1.554188 | 2.607565 | 1.868897 | 1.852188 | 3.08241  |
| CTPS2   | 5.507572 | 5.451168 |          |          |          |
| ASNS    | 2.708524 | 3.149188 |          | 2.353701 | 2.572353 |
| EIF3B   | 2.291517 | 2.446221 |          | 3.424307 | 2.447734 |
| ESD     | 2.936422 | 2.585656 |          | 2.271308 | 2.731271 |
| MTHFD1  | 2.933236 | 3.364453 | 1.966768 | 2.130307 |          |
| DBI     | 2.585513 | 2.694352 |          | 2.099327 | 3.007038 |
| SMNDC1  | 8.398417 |          | 1.918355 |          |          |
| YWHAH   |          | 3.636871 | 3.743545 | 2.875597 |          |
| TSPYL1  |          | 4.12942  | 2.117655 |          | 4.002969 |

|            |          |          |          |          |          |
|------------|----------|----------|----------|----------|----------|
| TOP2B      | 4.057183 | 3.388927 |          |          | 2.767654 |
| PSMA2      | 3.189391 | 3.625871 | 3.235108 |          |          |
| DBNL       | 2.477241 | 2.689188 | 2.181023 |          | 2.682106 |
| C12orf43   |          | 3.361569 | 3.543783 |          | 3.081793 |
| ATF1       | 2.544336 | 2.539029 | 2.654205 |          | 2.245269 |
| CREB1      | 2.544336 | 2.539029 | 2.654205 |          | 2.245269 |
| CREM       | 2.544336 | 2.539029 | 2.654205 |          | 2.245269 |
| TUBB3      | 8.395337 |          | 1.570525 |          |          |
| RGS10      | 2.78774  | 2.96248  | 2.127421 | 2.082464 |          |
| GLO1       | 2.543639 | 2.627275 |          | 1.79655  | 2.967073 |
| TKT        | 3.254846 |          | 3.348993 | 3.296897 |          |
| STRAP      | 2.467938 | 2.649202 | 2.640798 | 2.001073 |          |
| ATP1A2     |          |          | 2.322769 | 4.28073  | 3.06016  |
| HIST2H2AA3 |          |          | 2.083622 | 4.715684 | 2.783803 |
| PFKP       | 3.171084 | 3.09114  |          |          | 3.290698 |
| CAD        | 2.682196 | 2.644532 |          | 1.851236 | 2.342075 |
| TRMT6      | 2.405282 | 2.789246 |          | 1.889109 | 2.337332 |
| EIF4G1     |          | 2.235987 | 1.727318 | 3.032223 | 2.271037 |
| NUP50      | 3.44336  | 2.277269 |          |          | 3.482992 |
| SART3      | 2.044567 | 2.726008 | 2.262118 | 2.105084 |          |
| ADSL       | 2.399793 | 2.613935 |          | 1.785176 | 2.321479 |
| VRK1       | 2.106812 |          | 2.177151 | 2.355274 | 2.442467 |
| NMT1       | 3.506067 |          | 2.61793  |          | 2.714857 |
| RAB11FIP1  |          | 2.641627 | 3.469086 | 2.678778 |          |
| ANAPC7     | 2.82991  |          | 2.982728 |          | 2.908205 |
| ARL3       | 2.062439 | 2.208102 |          | 1.794842 | 2.620009 |
| AP1M2      |          | 4.23929  |          |          | 4.427896 |
| PSMC3      | 2.874807 | 3.243435 |          | 2.506897 |          |
| GSTO1      | 3.12412  | 3.250886 |          | 2.190064 |          |
| HAT1       | 2.655587 | 2.98603  |          |          | 2.920157 |
| IMPDH2     | 2.106161 | 2.519863 | 1.882199 |          | 2.026422 |
| RPS19      |          | 4.045033 |          |          | 4.455749 |
| CBR1       |          | 3.065652 | 3.284494 |          | 2.100458 |
| CBR3       |          | 3.065652 | 3.284494 |          | 2.100458 |
| TXNDC12    | 8.397056 |          |          |          |          |
| STX18      | 8.39644  |          |          |          |          |
| WIZ        | 8.39617  |          |          |          |          |
| TOX4       | 8.395991 |          |          |          |          |
| DDX52      | 8.395844 |          |          |          |          |
| FDFT1      | 8.395719 |          |          |          |          |
| RIC8A      | 8.395663 |          |          |          |          |
| PDE9A      | 8.395463 |          |          |          |          |
| FAM21D     | 8.395418 |          |          |          |          |
| RNF14      | 8.395376 |          |          |          |          |
| C5orf24    | 8.395375 |          |          |          |          |

|          |          |          |          |          |          |
|----------|----------|----------|----------|----------|----------|
| WDR3     | 4.357123 | 2.050935 |          |          | 1.931114 |
| ADNP     | 2.088494 |          | 1.365711 | 3.057401 | 1.812595 |
| CPNE3    | 2.254952 | 2.291597 |          | 1.594939 | 2.172848 |
| ARHGDIA  | 1.802579 | 1.656896 | 2.485199 |          | 2.318728 |
| NAE1     | 2.288575 | 2.383351 |          |          | 3.505206 |
| TNPO2    | 4.066277 |          |          |          | 4.047242 |
| PFKL     | 3.055048 | 3.022286 |          | 1.980592 |          |
| DYNC1LI1 |          | 2.781648 | 2.636195 |          | 2.509732 |
| DYNLRB1  |          | 1.400357 | 2.021666 |          | 4.359371 |
| HMGN2    |          |          | 1.925437 |          | 5.701539 |
| PAK1     |          | 3.583922 |          |          | 4.001088 |
| CUL4A    | 2.822311 | 2.557187 |          | 2.192953 |          |
| BLVRB    | 2.613873 | 2.691149 |          |          | 2.246742 |
| RRM1     | 2.327804 | 1.518488 | 1.545126 |          | 2.123231 |
| IK       |          |          | 1.837014 | 1.870852 | 3.731015 |
| CDC27    |          |          |          | 3.722954 | 3.671455 |
| FKBP1A   |          | 3.971498 | 3.326964 |          |          |
| IDH1     |          | 3.180389 | 1.80409  |          | 2.286727 |
| SRCAP    |          | 3.916234 |          |          | 3.249127 |
| CCDC124  | 2.154575 |          | 2.730384 | 2.260632 |          |
| HMGN1    |          | 1.260303 | 1.615465 | 4.202282 |          |
| RAB5A    |          |          |          | 4.87823  | 2.154035 |
| ANXA6    |          | 3.524212 |          |          | 3.496774 |
| NSFL1C   |          |          | 2.492627 | 1.815971 | 2.67758  |
| SUPT5H   |          | 2.606333 |          | 2.052731 | 2.242365 |
| H2AFX    |          | 2.344584 |          |          | 4.554693 |
| OSBP     | 3.503244 | 3.39253  |          |          |          |
| NCAPH    | 2.622689 |          |          |          | 4.26361  |
| SDHA     |          |          | 3.77281  | 3.091626 |          |
| TBRG4    |          | 3.949745 | 2.882558 |          |          |
| GSTP1    | 1.831634 | 1.88716  | 3.100771 |          |          |
| SMS      | 2.342579 | 2.89901  |          | 1.570894 |          |
| PPAN     |          |          | 3.116608 |          | 3.68206  |
| PSME3    | 1.675126 | 1.972155 | 3.035634 |          |          |
| ILK      |          |          |          | 3.172317 | 3.458382 |
| PFDN2    | 2.296509 | 2.473959 |          | 1.773901 |          |
| PHPT1    | 2.115589 | 2.263457 |          | 2.154205 |          |
| EEF1D    | 3.248443 | 3.264089 |          |          |          |
| SMN1     |          |          |          | 4.286629 | 2.1458   |
| SMN2     |          |          |          | 4.286629 | 2.1458   |
| NDUFS8   |          |          |          | 3.055673 | 3.338904 |
| PRMT1    | 2.142419 | 2.22586  | 2.010731 |          |          |
| UCK2     | 1.61479  | 1.611933 | 1.854843 |          | 1.19442  |
| RPIA     | 2.937837 |          |          |          | 3.250943 |
| PIN1     | 2.208864 |          |          | 1.713509 | 2.240623 |

|           |          |          |          |          |          |
|-----------|----------|----------|----------|----------|----------|
| EIF5      | 1.42314  | 1.502995 | 1.609835 |          | 1.550721 |
| IKBKAP    |          | 2.322042 |          |          | 3.750714 |
| DDB1      |          | 4.282996 | 1.675605 |          |          |
| IWS1      | 2.580707 |          |          |          | 3.364823 |
| FERMT2    | 2.110109 | 2.277672 |          | 1.52274  |          |
| RPL3L     | 2.500626 |          | 3.394207 |          |          |
| SMC4      |          |          | 2.669424 | 1.960001 | 1.252565 |
| PSMA4     | 2.328312 | 2.331153 | 1.218382 |          |          |
| MCM3      | 1.542041 | 1.402712 |          |          | 2.891169 |
| NPEPPSL1  |          | 2.245471 | 1.864875 | 1.628121 |          |
| NASP      | 1.579377 | 1.254726 | 1.565387 |          | 1.269363 |
| NAP1L4    | 2.848959 |          | 2.765722 |          |          |
| USP5      | 2.758499 | 2.834105 |          |          |          |
| CIRH1A    |          | 2.703142 | 2.87378  |          |          |
| STAG2     |          |          | 2.264161 | 3.310964 |          |
| NDUFAF3   | 1.924381 |          |          | 1.6416   | 1.872009 |
| TXNDC17   | 2.625698 | 2.797193 |          |          |          |
| EIF2S1    |          |          | 1.6592   | 1.781232 | 1.970866 |
| CANX      |          |          | 2.048367 |          | 3.360125 |
| PSMC2     |          | 1.355187 | 2.211635 |          | 1.832703 |
| EIF4G3    | 2.666532 |          | 2.630139 |          |          |
| CIAO1     |          |          | 2.643759 | 2.580158 |          |
| GLYR1     |          |          | 3.314392 |          | 1.889903 |
| TPM4      | 2.154613 |          |          |          | 3.030962 |
| NPLOC4    | 2.237215 |          |          |          | 2.913432 |
| RAB35     |          |          |          | 5.135311 |          |
| DNAJC8    | 2.775094 |          |          |          | 2.360196 |
| TBCB      | 2.823318 | 2.290626 |          |          |          |
| AK1       | 2.498222 | 2.590154 |          |          |          |
| DISC1     | 2.109011 | 2.937282 |          |          |          |
| TRAX      | 2.109011 | 2.937282 |          |          |          |
| TSNAX     | 2.109011 | 2.937282 |          |          |          |
| BRIX1     |          |          | 1.222172 |          | 3.770992 |
| GLOD4     | 3.679702 |          | 1.309835 |          |          |
| CHD5      | 2.343682 | 2.599169 |          |          |          |
| CDKN2A    |          |          | 2.522094 |          | 2.41989  |
| CDKN2B    |          |          | 2.522094 |          | 2.41989  |
| HIST2H2AC |          |          | 2.083622 |          | 2.783803 |
| LDHA      | 2.376643 |          | 2.46049  |          |          |
| RGPD1     | 1.732433 | 1.693463 |          |          | 1.362749 |
| FLNA      |          |          |          |          | 4.705229 |
| AHI1      |          |          |          | 4.682157 |          |
| MAGOHB    |          |          |          | 4.616539 |          |
| HBS1L     |          |          | 1.60252  |          | 3.003525 |
| KIF5B     | 2.305372 | 2.270194 |          |          |          |

|               |          |          |          |          |          |
|---------------|----------|----------|----------|----------|----------|
| TUBA1B        | 2.256509 |          | 2.315176 |          |          |
| TBCE          |          | 2.205085 |          |          | 2.339361 |
| COQ9          | 2.333146 |          |          | 2.18664  |          |
| CNN3          | 2.500506 |          | 2.009336 |          |          |
| MSH2          | 1.411942 | 1.427824 |          |          | 1.584785 |
| POLR2A        | 2.577901 |          |          |          | 1.835639 |
| MTA1          | 1.622628 | 1.155342 |          | 1.597278 |          |
| PPME1         |          |          |          | 1.582711 | 2.783411 |
| XPO5          |          |          |          | 2.242301 | 2.119539 |
| LCP1          |          |          | 2.250931 | 2.090113 |          |
| PDHX          |          |          | 1.674125 |          | 2.664591 |
| NUP153        | 2.100429 |          |          |          | 2.220596 |
| TCERG1        | 1.11115  |          | 1.651533 |          | 1.556375 |
| MYH14         |          | 2.370724 |          | 1.920797 |          |
| SMC1A         | 1.250903 | 1.348833 | 1.667524 |          |          |
| DDI2          | 2.648164 |          |          | 1.607718 |          |
| DAP           |          |          |          |          | 4.253544 |
| BAG2          |          |          |          | 4.225133 |          |
| CLN6          |          |          |          | 4.162955 |          |
| NANS          | 2.025002 |          |          |          | 2.132202 |
| GPATCH4       | 1.146351 |          | 2.907607 |          |          |
| ACAT2         | 2.076233 |          |          | 1.947391 |          |
| CIAPIN1       | 1.517181 |          | 2.490515 |          |          |
| DKFZp686E0752 |          |          | 2.100582 |          | 1.888466 |
| RBMXL3        | 2.045071 |          | 1.924122 |          |          |
| CDV3          |          |          |          |          | 3.942235 |
| DKFZp586I031  |          |          |          | 3.84153  |          |
| TUBA1A        | 2.337513 |          |          |          | 1.446373 |
| RBM25         |          |          | 1.927971 |          | 1.848004 |
| LMAN2         | 1.141305 | 1.104857 |          | 1.52613  |          |
| PPM1G         |          |          | 2.06745  | 1.678038 |          |
| GTF3C5        | 3.601875 |          |          |          |          |
| PAK2          |          |          |          |          | 3.578705 |
| VBP1          |          | 1.757927 | 1.79784  |          |          |
| PYGL          | 1.804683 | 1.732025 |          |          |          |
| DSG1          |          |          |          | 3.506583 |          |
| ADH5          |          | 3.501293 |          |          |          |
| PSMD2         | 1.142714 | 1.114172 |          |          | 1.218004 |
| RNF40         |          |          |          |          | 3.472232 |
| ZNF346        |          |          |          |          | 3.468571 |
| ELMOD2        |          |          |          |          | 3.452888 |
| RFC2          | 1.818761 | 1.629611 |          |          |          |
| AKAP8         |          |          |          |          | 3.432349 |
| PHKA1         |          |          |          |          | 3.425716 |
| FLII          | 3.42069  |          |          |          |          |

|          |          |          |          |          |          |
|----------|----------|----------|----------|----------|----------|
| STUB1    |          |          |          | 3.419912 |          |
| ROCK2    |          |          |          | 3.410404 |          |
| ESF1     | 1.533084 |          |          |          | 1.866348 |
| IGF2BP2  |          |          |          | 2.149886 | 1.234563 |
| HDAC6    |          |          | 1.776288 |          | 1.597609 |
| RBM3     |          |          | 1.508934 | 1.862118 |          |
| MAP1S    |          |          |          |          | 3.368592 |
| EIF5B    |          | 1.418818 |          | 1.938088 |          |
| OMA1     |          |          |          |          | 3.346786 |
| TOM1     |          |          |          | 3.336384 |          |
| PPIE     |          |          |          | 3.317107 |          |
| HN1L     | 1.739822 | 1.553986 |          |          |          |
| EMG1     |          | 1.805193 |          |          | 1.483146 |
| SREK1    |          |          |          |          | 3.283596 |
| ACADVL   |          |          |          |          | 3.273028 |
| CFL1     |          |          |          |          | 3.271146 |
| SCRN1    |          |          |          | 3.221957 |          |
| APEX1    |          |          |          | 3.201266 |          |
| TUBB4A   |          |          | 3.200282 |          |          |
| VEZF1    |          |          |          |          | 3.180091 |
| CCDC86   |          |          | 1.070258 |          | 2.100729 |
| TFCP2    |          |          | 3.154542 |          |          |
| UBP1     |          |          | 3.154542 |          |          |
| MYO1B    |          |          |          |          | 3.102331 |
| AASDHPPT |          |          |          | 3.088458 |          |
| MCL1     |          |          |          | 3.074545 |          |
| ANXA5    |          |          | 1.864747 |          | 1.200904 |
| ATP2A3   |          |          |          | 3.063403 |          |
| RGPD2    |          | 1.693463 |          |          | 1.362749 |
| PRKAG1   |          |          |          | 3.030451 |          |
| SERPINH1 |          |          |          | 3.009685 |          |
| SMARCB1  |          |          |          |          | 3.006108 |
| LDHAL6B  |          |          | 2.990718 |          |          |
| UBE2N    |          |          |          |          | 2.980724 |
| PPP1CB   |          |          |          | 2.95934  |          |
| MYH10    | 1.556372 | 1.367202 |          |          |          |
| HNRNPD   |          |          |          |          | 2.921809 |
| CENPV    |          | 1.195371 |          |          | 1.713292 |
| HMG20B   |          |          |          |          | 2.902378 |
| TLN1     |          |          | 1.621591 |          | 1.253681 |
| APOBEC3C |          |          |          | 2.872783 |          |
| CCDC47   | 2.870649 |          |          |          |          |
| TOP1MT   | 1.105843 |          |          | 1.761203 |          |
| MKI67    |          |          | 1.527097 |          | 1.311735 |
| RPL18A   |          | 1.367772 |          |          | 1.468623 |



|          |          |          |          |          |          |
|----------|----------|----------|----------|----------|----------|
| UAP1     |          |          |          |          | 2.822279 |
| SEPT9    |          |          |          |          | 2.814901 |
| TMEM180  |          | 2.813605 |          |          |          |
| XPO7     |          | 1.381979 |          |          | 1.420289 |
| DARS     | 1.134166 |          | 1.663665 |          |          |
| SLC9A3R1 |          |          | 1.582212 |          | 1.205664 |
| UBL4A    |          |          | 1.567043 |          | 1.190246 |
| SMC2     |          | 2.70295  |          |          |          |
| MORF4L2  |          |          |          | 2.684399 |          |
| QARS     | 1.311078 | 1.369517 |          |          |          |
| C3orf17  |          |          |          |          | 2.631293 |
| HLA-B    |          |          |          | 2.608514 |          |
| HLA-C    |          |          |          | 2.608514 |          |
| DHFR     |          |          |          |          | 2.528393 |
| CHORDC1  |          |          |          |          | 2.486938 |
| POLR2E   |          |          |          | 2.457537 |          |
| DCTPP1   |          |          |          |          | 2.404791 |
| HTATSF1  |          |          | 1.271637 |          | 1.124999 |
| TUBA1C   |          |          | 2.373789 |          |          |
| ALCAM    | 2.367477 |          |          |          |          |
| GOLIM4   |          |          |          |          | 2.353958 |
| RPE      |          |          |          | 2.347019 |          |
| PRPF3    |          |          |          | 2.341057 |          |
| TUBA1A   |          |          | 2.339691 |          |          |
| CPSF3    | 1.123438 | 1.207329 |          |          |          |
| PSMD6    |          | 2.317931 |          |          |          |
| PAFAH1B1 |          | 2.310399 |          |          |          |
| PSMC5    |          | 2.306194 |          |          |          |
| ERCC6L   | 2.299655 |          |          |          |          |
| RPLP0    | 2.273211 |          |          |          |          |
| STIP1    | 1.106559 | 1.164233 |          |          |          |
| SEPT2    |          |          |          |          | 2.25728  |
| NIFK     | 2.255057 |          |          |          |          |
| HIST2H3A |          |          | 2.253183 |          |          |
| PRDX4    |          |          | 2.252693 |          |          |
| QKI      |          |          | 2.247704 |          |          |
| TES      | 2.245258 |          |          |          |          |
| LRPAP1   |          |          |          |          | 2.242278 |
| EIF3I    |          |          |          | 2.226455 |          |
| TSN      |          | 2.204109 |          |          |          |
| DDX23    |          |          |          |          | 2.202271 |
| TPD52    |          |          |          | 2.193949 |          |
| ACTN1    |          |          |          | 2.184697 |          |
| TCEA1    |          |          |          |          | 2.178464 |
| GDI2     |          |          |          |          | 2.177502 |

|          |          |  |          |          |          |
|----------|----------|--|----------|----------|----------|
| EIF2B2   |          |  |          |          | 2.168518 |
| KIAA1033 | 2.097702 |  |          |          |          |
| ERCC6L   |          |  |          |          | 2.089868 |
| PAFAH1B1 | 2.067439 |  |          |          |          |
| ANP32B   | 2.053316 |  |          |          |          |
| TUBA4A   |          |  | 2.042978 |          |          |
| PRPF4B   |          |  | 2.03932  |          |          |
| PSMD12   |          |  |          | 2.037397 |          |
| MDH1     | 2.024572 |  |          |          |          |
| DYNLRB2  |          |  | 2.021666 |          |          |
| MRI1     |          |  |          | 2.01823  |          |
| NUCKS1   | 2.016247 |  |          |          |          |
| CCT3     |          |  |          | 2.007019 |          |
| CBR4     |          |  |          | 1.989354 |          |
| KT112    |          |  |          | 1.964778 |          |
| SLC7A1   |          |  |          | 1.939308 |          |
| CDK12    |          |  |          | 1.932448 |          |
| NUFIP2   |          |  |          | 1.920692 |          |
| PSMD14   | 1.901163 |  |          |          |          |
| BAZ1B    |          |  | 1.894201 |          |          |
| ANXA7    |          |  |          | 1.893069 |          |
| GALK1    |          |  |          | 1.890616 |          |
| HNRNPUL1 |          |  | 1.889222 |          |          |
| CSNK2A1  |          |  | 1.87473  |          |          |
| LARP1    |          |  | 1.866332 |          |          |
| PRMT8    |          |  | 1.850692 |          |          |
| SNRNP200 |          |  | 1.844081 |          |          |
| RPL35A   |          |  |          | 1.83632  |          |
| RPS16    |          |  | 1.813713 |          |          |
| PARK7    |          |  |          | 1.811951 |          |
| UHRF1    |          |  |          | 1.806173 |          |
| TNPO1    |          |  |          | 1.778109 |          |
| TXNL1    |          |  |          | 1.764343 |          |
| ACTR3    |          |  |          | 1.761343 |          |
| UBBP4    |          |  | 1.758443 |          |          |
| PSMA8    |          |  | 1.756944 |          |          |
| ZC3H13   |          |  | 1.737082 |          |          |
| SETDB1   |          |  | 1.727491 |          |          |
| DHX36    |          |  | 1.697293 |          |          |
| NEDD8    |          |  |          |          | 1.692487 |
| DDX39B   |          |  | 1.660506 |          |          |
| PRRC2A   |          |  |          | 1.633617 |          |
| GBAS     |          |  |          | 1.633366 |          |
| ARPC5L   |          |  | 1.632602 |          |          |
| HOXB9    |          |  |          | 1.62912  |          |

|         |          |          |          |          |          |
|---------|----------|----------|----------|----------|----------|
| MCM2    |          |          |          | 1.627222 |          |
| HSPH1   |          |          |          | 1.626328 |          |
| CBX8    |          |          | 1.61811  |          |          |
| PPP2R1B |          |          | 1.616749 |          |          |
| FIP1L1  |          |          |          | 1.609962 |          |
| KIF4A   |          |          |          |          | 1.599431 |
| APEH    |          |          |          |          | 1.583877 |
| LUC7L   |          |          |          | 1.581412 |          |
| FXR1    |          |          |          |          | 1.580384 |
| PRKDC   |          |          |          |          | 1.577578 |
| SGTA    |          |          | 1.575902 |          |          |
| CARHSP1 |          |          | 1.57065  |          |          |
| DTYMK   |          |          | 1.566357 |          |          |
| METAP1  | 1.563878 |          |          |          |          |
| CHD3    |          |          |          | 1.562453 |          |
| FAM98A  |          |          |          | 1.557329 |          |
| EIF2A   |          |          | 1.551684 |          |          |
| DNAH17  |          |          |          |          | 1.548303 |
| UBE2D3  |          |          | 1.529338 |          |          |
| ME2     |          |          |          | 1.518048 |          |
| SRRM2   | 1.516944 |          |          |          |          |
| EARS2   |          |          |          | 1.513715 |          |
| MAD1L1  |          |          |          | 1.509956 |          |
| POTEKP  |          |          | 1.504923 |          |          |
| NACA    |          |          | 1.50349  |          |          |
| NACAP1  |          |          | 1.50349  |          |          |
| LRRC47  |          | 1.488033 |          |          |          |
| FXR2    |          |          |          |          | 1.445578 |
| HINT1   |          |          | 1.408848 |          |          |
| EEF1A1  |          |          | 1.402572 |          |          |
| WIBG    |          |          |          |          | 1.392807 |
| RPS10P5 |          | 1.374198 |          |          |          |
| TRMT112 |          |          |          |          | 1.364311 |
| AGPAT9  |          |          |          |          | 1.364114 |
| HSPA9   |          |          | 1.335724 |          |          |
| PSMA6   |          | 1.333539 |          |          |          |
| PPP2R1A |          |          | 1.30445  |          |          |
| ALDOC   |          |          | 1.291011 |          |          |
| G3BP1   | 1.290525 |          |          |          |          |
| CKS1B   |          |          |          |          | 1.284495 |
| EIF5AL1 |          |          | 1.276704 |          |          |
| RNH1    | 1.271124 |          |          |          |          |
| TIAL1   |          |          | 1.254393 |          |          |
| ACTA1   |          |          | 1.252366 |          |          |
| ACTC1   |          |          | 1.252366 |          |          |

|          |          |          |          |  |          |
|----------|----------|----------|----------|--|----------|
| PDCD6IP  |          |          | 1.23835  |  |          |
| PRPSAP1  |          |          |          |  | 1.221887 |
| POLA2    |          |          | 1.216492 |  |          |
| FBL      |          |          |          |  | 1.206014 |
| ATP6V1A  |          |          |          |  | 1.201298 |
| DCP1A    |          |          | 1.192596 |  |          |
| PDS5B    |          |          | 1.176637 |  |          |
| POLR2F   | 1.17413  |          |          |  |          |
| P4HB     |          |          | 1.167048 |  |          |
| PKLR     |          |          |          |  | 1.155769 |
| COTL1    | 1.148505 |          |          |  |          |
| TUBB4B   | 1.141674 |          |          |  |          |
| TAGLN3   | 1.13987  |          |          |  |          |
| NDUFS3   |          |          | 1.139498 |  |          |
| ACTG1    |          |          | 1.134789 |  |          |
| DNAJC9   |          |          |          |  | 1.128284 |
| POLR1B   | 1.125633 |          |          |  |          |
| AP1B1    |          |          |          |  | 1.125592 |
| RPN2     |          |          | 1.118738 |  |          |
| TUBB     |          |          | 1.116309 |  |          |
| HSPE1    |          |          | 1.111033 |  |          |
| RBM12    | 1.110149 |          |          |  |          |
| TUBA3E   |          |          | 1.110002 |  |          |
| CUL1     | 1.103107 |          |          |  |          |
| CKB      |          |          | 1.099887 |  |          |
| GTF3C1   |          |          | 1.093405 |  |          |
| POLR1A   |          |          | 1.088984 |  |          |
| TRIM28   |          |          | 1.076259 |  |          |
| ZNF280C  |          |          | 1.058779 |  |          |
| DNAJB12  |          |          | 1.041633 |  |          |
| EDC4     |          |          | 1.037882 |  |          |
| CDK4     |          |          | 1.008909 |  |          |
| RPLP2    |          |          | 1.00117  |  |          |
| PPP2CB   |          |          | -1.00916 |  |          |
| PPP1R14B |          |          | -1.01396 |  |          |
| TIMM22   |          |          | -1.01472 |  |          |
| RBM12B   |          |          | -1.02965 |  |          |
| MLEC     |          |          | -1.03495 |  |          |
| RUVBL2   |          |          | -1.04516 |  |          |
| RB1      |          |          | -1.06257 |  |          |
| MAZ      |          |          | -1.07808 |  |          |
| SF3B4    |          |          | -1.09069 |  |          |
| CCDC51   |          |          | -1.09908 |  |          |
| UQCRC2   |          |          |          |  | -1.1091  |
| ZNF638   |          | -1.10911 |          |  |          |

|          |          |          |          |  |          |
|----------|----------|----------|----------|--|----------|
| NDUFB10  | -1.11476 |          |          |  |          |
| HSPA13   | -1.11566 |          |          |  |          |
| SPTBN4   |          |          | -1.128   |  |          |
| BRAT1    |          |          | -1.12855 |  |          |
| VAT1     |          |          | -1.14081 |  |          |
| CHCHD1   |          |          | -1.14543 |  |          |
| CAMSAP3  | -1.14555 |          |          |  |          |
| LMNB1    |          |          |          |  | -1.14797 |
| GALNT2   |          |          |          |  | -1.15508 |
| MRPS31   |          | -1.1554  |          |  |          |
| SLC25A13 | -1.16242 |          |          |  |          |
| SLC25A6  | -1.16807 |          |          |  |          |
| ACTN4    | -1.16988 |          |          |  |          |
| STAMBP   |          |          | -1.17408 |  |          |
| SEC24C   | -1.17618 |          |          |  |          |
| MTX2     | -1.1889  |          |          |  |          |
| LSM7     |          |          | -1.19163 |  |          |
| NKTR     |          |          | -1.19658 |  |          |
| SNTB2    |          |          | -1.19795 |  |          |
| PGM2     |          |          | -1.21145 |  |          |
| NOP58    | -1.21251 |          |          |  |          |
| ERLIN2   |          | -1.21726 |          |  |          |
| GSR      |          |          | -1.22906 |  |          |
| LYZ      |          |          | -1.23648 |  |          |
| DNTTIP2  |          |          |          |  | -1.24395 |
| LYPLAL1  |          |          | -1.24517 |  |          |
| COPB1    |          |          | -1.24529 |  |          |
| NDUFA4   | -1.24583 |          |          |  |          |
| TMLHE    |          |          | -1.27025 |  |          |
| RNPS1    |          |          |          |  | -1.2714  |
| SCPEP1   |          |          | -1.27248 |  |          |
| PYCR1    |          |          |          |  | -1.27453 |
| CCDC88A  | -1.27471 |          |          |  |          |
| PFDN5    |          |          | -1.27554 |  |          |
| MMAB     | -1.28051 |          |          |  |          |
| CGGBP1   | -1.28207 |          |          |  |          |
| TIMM23   |          |          | -1.28665 |  |          |
| TIMM23B  |          |          | -1.28665 |  |          |
| SDHB     |          |          | -1.28684 |  |          |
| PRSS1    |          | -1.30976 |          |  |          |
| PRSS2    |          | -1.30976 |          |  |          |
| PRSS3P2  |          | -1.30976 |          |  |          |
| EXOSC5   |          |          | -1.32081 |  |          |
| CWC15    |          |          |          |  | -1.32896 |
| BOP1     |          | -1.33159 |          |  |          |

|          |          |          |          |          |          |
|----------|----------|----------|----------|----------|----------|
| SPG20    |          |          |          |          | -1.33557 |
| WDR43    |          |          | -1.36443 |          |          |
| DIEXF    |          | -1.37618 |          |          |          |
| CDC45    |          |          | -1.40076 |          |          |
| TRO      |          |          | -1.4076  |          |          |
| PDCD11   | -1.41131 |          |          |          |          |
| PPP6R1   |          |          | -1.4252  |          |          |
| FAF2     |          |          | -1.42749 |          |          |
| PHC2     |          |          | -1.42766 |          |          |
| MARK3    |          |          | -1.44908 |          |          |
| MARK4    |          |          | -1.44908 |          |          |
| NDUFS4   |          |          | -1.44972 |          |          |
| RAP1GDS1 |          |          | -1.46996 |          |          |
| EXOSC9   |          |          |          |          | -1.47545 |
| MCCC2    |          | -1.47809 |          |          |          |
| HCFC1    |          |          |          |          | -1.48259 |
| C19orf52 |          |          | -1.4936  |          |          |
| ERO1L    |          | -1.49414 |          |          |          |
| POLR1C   |          |          |          | -1.50428 |          |
| GCN1L1   |          |          |          | -1.51573 |          |
| REEP5    |          |          |          |          | -1.5168  |
| G3BP2    |          |          | -1.52082 |          |          |
| YME1L1   |          |          | -1.52959 |          |          |
| EXOC3L4  |          |          | -1.53352 |          |          |
| RGPD5    |          |          | -1.55343 |          |          |
| XPO6     |          |          | -1.55413 |          |          |
| ALDH1L2  |          |          |          | -1.55708 |          |
| CORO1C   |          |          |          | -1.56106 |          |
| TECR     |          | -1.56485 |          |          |          |
| PTPN1    |          |          | -1.57248 |          |          |
| GRWD1    |          |          |          | -1.57849 |          |
| NOMO2    |          |          | -1.5839  |          |          |
| NSUN4    |          |          | -1.60201 |          |          |
| CSNK2A2  |          |          | -1.61239 |          |          |
| AIG1     |          |          |          | -1.63224 |          |
| GOSR2    |          |          | -1.65214 |          |          |
| MYBBP1A  |          |          |          |          | -1.65342 |
| SRPRB    |          |          | -1.68789 |          |          |
| USP14    |          |          |          | -1.6973  |          |
| ABHD10   |          |          | -1.69968 |          |          |
| CSTF2    |          |          |          |          | -1.7048  |
| SUCLG2   |          | -1.73871 |          |          |          |
| SRRM1    |          |          |          | -1.74111 |          |
| FAR1     |          |          |          |          | -1.74231 |
| HIST1H3A |          |          |          | -1.75195 |          |

|              |          |          |          |          |          |
|--------------|----------|----------|----------|----------|----------|
| ETF A        |          |          | -1.7546  |          |          |
| TTC7A        |          |          | -1.75771 |          |          |
| REEP5        |          |          | -1.76584 |          |          |
| DDX6         |          |          | -1.7732  |          |          |
| ICT1         |          |          | -1.82779 |          |          |
| DECR1        |          |          | -1.83704 |          |          |
| ARF3         |          |          | -1.85763 |          |          |
| SRRT         |          |          | -1.86454 |          |          |
| RGPD3        |          |          | -1.87203 |          |          |
| RGPD4        |          |          | -1.87203 |          |          |
| AHCTF1       |          |          | -1.9028  |          |          |
| ACTR2        |          |          | -1.92913 |          |          |
| PPP6R3       |          |          | -1.94344 |          |          |
| BCL2L10      |          |          | -1.94839 |          |          |
| SPTBN2       |          |          | -1.95511 |          |          |
| SNRPF        |          |          | -1.95716 |          |          |
| ATP5O        |          |          | -1.95751 |          |          |
| RPL27        |          |          |          | -1.96694 |          |
| PDIA3        |          |          |          | -1.97012 |          |
| LYRM7        |          |          | -1.98578 |          |          |
| ACAT1        |          |          |          | -1.99768 |          |
| GATAD2A      | -2.00115 |          |          |          |          |
| UBE2O        | -2.0075  |          |          |          |          |
| MRPS9        |          |          | -2.01295 |          |          |
| PAIP1        |          |          | -2.01615 |          |          |
| VAR5         |          |          |          |          | -2.02383 |
| COMMD6       | -2.03996 |          |          |          |          |
| CAMK2D       | -2.04093 |          |          |          |          |
| FANCI        | -2.04489 |          |          |          |          |
| COIL         |          |          | -2.05517 |          |          |
| FKBP4        |          |          | -2.06061 |          |          |
| UTP20        |          |          | -2.08717 |          |          |
| THOC6        |          |          | -2.08785 |          |          |
| INIP         | -2.09532 |          |          |          |          |
| HIST3H3      |          |          |          | -2.1374  |          |
| NPM3         |          |          | -2.13896 |          |          |
| TMPO         |          |          |          |          | -2.14128 |
| MAN2B1       |          |          | -2.14592 |          |          |
| TMEM205      |          |          |          |          | -2.15592 |
| LPCAT1       | -2.16116 |          |          |          |          |
| POLR1E       |          |          |          |          | -2.16166 |
| PAK1IP1      |          | -2.16245 |          |          |          |
| TMED7        |          |          |          |          | -2.16247 |
| TMED7-TICAM2 |          |          |          |          | -2.16247 |
| DCBLD2       |          |          | -2.17121 |          |          |

|                |          |          |          |          |          |
|----------------|----------|----------|----------|----------|----------|
| FHL1           |          |          | -2.18492 |          |          |
| CSTF3          |          | -2.18621 |          |          |          |
| SSR4           |          |          |          |          | -2.19183 |
| NDUFA3         |          |          |          |          | -2.19232 |
| PDS5A          |          |          |          | -2.19316 |          |
| COX5B          |          | -2.20824 |          |          |          |
| KIF16B         |          |          | -2.21275 |          |          |
| KIF3A          |          |          | -2.21275 |          |          |
| KIF6           |          |          | -2.21275 |          |          |
| RABL6          | -2.22525 |          |          |          |          |
| NIP7           |          |          | -2.22542 |          |          |
| NDUFS1         |          | -2.23322 |          |          |          |
| CNIH4          |          | -2.24852 |          |          |          |
| GHITM          |          | -2.25257 |          |          |          |
| NFKBIL1        | -2.25674 |          |          |          |          |
| DLG1           |          |          |          |          | -2.25945 |
| GPT2           |          | -2.26076 |          |          |          |
| PREB           |          |          | -2.27082 |          |          |
| MIA3           |          | -2.27298 |          |          |          |
| C12orf73       |          |          |          |          | -2.29409 |
| COX4I1         |          | -2.31342 |          |          |          |
| HSPA4L         |          |          | -2.31391 |          |          |
| GK             |          |          |          | -2.31966 |          |
| GK3P           |          |          |          | -2.31966 |          |
| ALDH5A1        |          | -2.32574 |          |          |          |
| KRTCAP2        |          |          |          |          | -2.3308  |
| SYNJ2BP        | -2.33112 |          |          |          |          |
| FAM114A2       |          |          |          |          | -2.33745 |
| GIGYF2         |          |          |          | -2.3379  |          |
| NDUFAF2        | -2.35618 |          |          |          |          |
| NOP16          |          |          | -2.35907 |          |          |
| KHDRBS3        | -2.3595  |          |          |          |          |
| ASMTL          | -2.36187 |          |          |          |          |
| C7orf55-LUC7L2 | -2.37358 |          |          |          |          |
| SUPT6H         |          |          |          | -2.37395 |          |
| ACOT7          |          |          |          | -2.37895 |          |
| ATP6V1B1       |          | -2.37952 |          |          |          |
| BPNT1          |          |          | -2.38095 |          |          |
| PSMB3          |          |          |          | -2.38387 |          |
| MANBAL         |          |          |          |          | -2.38513 |
| AP3M1          |          |          |          | -2.39502 |          |
| PTCD3          |          |          | -2.40615 |          |          |
| HLA-A          |          |          |          |          | -2.42323 |
| LAMP2          |          | -2.42551 |          |          |          |



|               |          |          |          |          |          |
|---------------|----------|----------|----------|----------|----------|
| BUD31         |          |          |          |          | -2.44734 |
| NCAPD3        |          |          | -2.45663 |          |          |
| DES           | -1.21598 |          | -1.24522 |          |          |
| NOL11         | -2.47084 |          |          |          |          |
| PRPH          | -1.30613 |          | -1.17451 |          |          |
| H2AFV         | -2.48235 |          |          |          |          |
| UTP11L        | -2.48239 |          |          |          |          |
| PHB           | -1.37903 | -1.10556 |          |          |          |
| SLC33A1       |          | -2.51406 |          |          |          |
| TIMM10B       |          | -2.52139 |          |          |          |
| TMOD3         |          |          | -2.527   |          |          |
| MKLN1         |          |          | -2.53646 |          |          |
| AGPS          |          |          |          |          | -2.55315 |
| SYNJ2BP-COX16 |          | -2.55547 |          |          |          |
| PSAP          |          |          |          |          | -2.56886 |
| RGPD8         |          |          | -2.57272 |          |          |
| SSR1          |          | -2.57662 |          |          |          |
| OSBPL8        |          |          | -2.58392 |          |          |
| CNOT1         |          |          | -2.58404 |          |          |
| MRPL45        |          | -2.58432 |          |          |          |
| ATP5SL        | -1.35189 |          |          |          | -1.24605 |
| ATP5J         |          | -2.62367 |          |          |          |
| WBP11         |          |          |          |          | -2.62712 |
| ELAVL1        |          | -2.62984 |          |          |          |
| MRPL22        | -2.65908 |          |          |          |          |
| GNA11         |          |          | -2.68151 |          |          |
| GNA14         |          |          | -2.68151 |          |          |
| GNAQ          |          |          | -2.68151 |          |          |
| MRPS25        |          |          | -1.56416 |          | -1.12077 |
| SLC39A9       |          |          |          |          | -2.69056 |
| SLC25A12      | -1.17503 |          | -1.53207 |          |          |
| CTCF          | -2.71075 |          |          |          |          |
| GNG5          | -1.4157  |          |          |          | -1.30281 |
| PPIAL4A       | -2.72575 |          |          |          |          |
| SRSF11        | -2.75083 |          |          |          |          |
| ATP5A1        |          | -1.24159 |          | -1.5355  |          |
| HACL1         |          |          | -2.78187 |          |          |
| UBQLN1        |          |          |          | -1.72742 | -1.12263 |
| MRPS7         |          | -2.90146 |          |          |          |
| DDT           |          |          | -2.90901 |          |          |
| DDTL          |          |          | -2.90901 |          |          |
| NIPSNAP1      |          |          | -1.11274 |          | -1.81062 |
| MRPL45        | -2.96006 |          |          |          |          |
| NUP88         |          |          |          | -2.96026 |          |
| CTR9          |          |          | -2.97888 |          |          |

|              |          |          |          |          |          |
|--------------|----------|----------|----------|----------|----------|
| SPIN1        |          |          |          |          | -2.99229 |
| AGK          | -1.17916 |          | -1.8191  |          |          |
| VDAC3        | -1.51585 |          | -1.49345 |          |          |
| NUP93        |          | -3.01937 |          |          |          |
| AMOT         |          |          |          | -3.02075 |          |
| TARS2        |          |          |          |          | -3.02639 |
| LOC102724023 |          |          |          |          | -3.0301  |
| GEMIN6       |          |          |          |          | -3.03303 |
| DACH2        |          |          |          |          | -3.03316 |
| ERAL1        | -1.66199 |          |          |          | -1.37161 |
| SUCLA2       |          |          |          |          | -3.03472 |
| ATG3         |          |          |          | -3.03867 |          |
| CHTOP        |          |          | -1.83287 |          | -1.20788 |
| NDUFS5       |          |          |          |          | -3.05744 |
| GADD45GIP1   |          |          | -1.74697 |          | -1.31996 |
| MRPS2        |          |          |          |          | -3.06916 |
| EPRS         |          |          |          |          | -3.07368 |
| UTP18        |          |          |          |          | -3.07788 |
| EIF1AX       |          |          |          | -3.07791 |          |
| RPL6         |          |          |          |          | -3.07829 |
| NT5C3B       |          |          |          |          | -3.08342 |
| KRT5         |          |          |          | -3.09786 |          |
| KARS         |          |          |          | -3.11038 |          |
| HSPBP1       |          |          |          |          | -3.11635 |
| TRAFFD1      |          |          |          |          | -3.11694 |
| PPP2R2A      |          |          |          |          | -3.11802 |
| PPP2R2C      |          |          |          |          | -3.11802 |
| RPS28        |          |          |          | -3.11829 |          |
| S100A13      |          |          |          | -3.11925 |          |
| UROD         |          |          |          |          | -3.12246 |
| MYH1         |          |          |          |          | -3.12378 |
| MYH13        |          |          |          |          | -3.12378 |
| MYH2         |          |          |          |          | -3.12378 |
| CEP170       |          |          | -3.12517 |          |          |
| RAB18        |          |          |          |          | -3.12607 |
| ANKLE2       |          |          |          | -3.13059 |          |
| YIPF5        |          |          |          |          | -3.13226 |
| LIN7B        |          |          |          |          | -3.13237 |
| MRPL49       |          |          | -1.60293 | -1.53817 |          |
| U2AF2        |          |          |          |          | -3.14343 |
| CLASP2       |          |          |          |          | -3.15945 |
| HSP90B2P     |          |          |          |          | -3.16336 |
| SEC23B       |          |          |          | -3.16532 |          |
| ALDH2        |          |          |          |          | -3.17587 |
| BCAP31       |          |          | -1.72292 |          | -1.45334 |

|            |          |          |          |          |          |
|------------|----------|----------|----------|----------|----------|
| ZNF330     |          |          |          | -3.17876 |          |
| BLMH       |          |          | -1.73566 |          | -1.44336 |
| TMEM41B    |          |          |          |          | -3.1829  |
| DACH1      |          |          |          |          | -3.18506 |
| MAP1LC3B   |          |          |          |          | -3.18523 |
| MAP1LC3B2  |          |          |          |          | -3.18523 |
| HIST2H3PS2 |          |          |          |          | -3.19092 |
| SNX18      |          |          |          | -3.19827 |          |
| RSU1       |          |          |          |          | -3.21191 |
| NCAPD2     |          |          |          |          | -3.21349 |
| SLC25A10   |          |          | -1.8962  |          | -1.32037 |
| OGFR       |          |          |          |          | -3.22563 |
| FAF1       |          |          |          | -3.2377  |          |
| SRP19      | -1.67919 | -1.55882 |          |          |          |
| BAG3       |          |          |          |          | -3.24052 |
| WBP2       |          |          |          |          | -3.24064 |
| RELA       |          |          |          |          | -3.24188 |
| YWHAE      |          |          |          | -3.2432  |          |
| GLG1       | -1.64478 | -1.60339 |          |          |          |
| GNB2L1     |          | -1.2349  |          | -2.01328 |          |
| MRPS6      | -1.58098 | -1.69447 |          |          |          |
| MRPL1      |          |          |          |          | -3.28206 |
| MRPS17     |          |          |          | -2.03559 | -1.24748 |
| ALDH16A1   |          |          |          |          | -3.28612 |
| SDF4       |          |          |          | -3.30313 |          |
| QPCTL      |          |          |          | -3.30868 |          |
| KIAA1429   |          |          |          |          | -3.30881 |
| RPS5       |          |          |          |          | -3.3094  |
| ITGB1      |          |          |          | -3.33129 |          |
| NDUFA13    |          |          |          |          | -3.34779 |
| UFD1L      |          |          |          |          | -3.35071 |
| HSP90B1    |          |          |          |          | -3.36368 |
| HIST1H2AA  |          |          | -3.36735 |          |          |
| HIST2H2AB  |          |          | -3.36735 |          |          |
| GMPR2      |          |          |          |          | -3.36912 |
| RQCD1      |          |          |          |          | -3.37351 |
| NUP214     |          | -1.14842 |          | -2.22845 |          |
| CWF19L1    |          |          |          | -3.39796 |          |
| S100A11    |          |          |          | -3.40122 |          |
| SPCS2      |          |          |          | -3.41001 |          |
| TFIP11     |          |          |          | -3.41337 |          |
| LRRFIP1    |          |          |          | -3.41549 |          |
| SMPD4      |          |          |          |          | -3.4164  |
| CAST       |          |          |          |          | -3.43104 |
| RPS26P11   |          |          |          |          | -3.43205 |

|          |          |          |          |          |          |
|----------|----------|----------|----------|----------|----------|
| CCAR1    | -1.81673 | -1.61559 |          |          |          |
| SNX6     |          |          |          |          | -3.43502 |
| DDX3X    |          |          |          |          | -3.43704 |
| RPS26    |          |          |          |          | -3.44696 |
| MRPS26   |          |          |          | -3.45324 |          |
| PSMD13   |          |          |          | -3.46632 |          |
| POLR3C   |          |          |          | -3.46868 |          |
| KRT16    |          |          |          | -3.47708 |          |
| SRSF2    |          |          |          |          | -3.48141 |
| ACYP1    |          |          |          |          | -3.48797 |
| STAU1    |          |          |          |          | -3.4887  |
| SNRPB    |          |          |          |          | -3.5004  |
| SNRPN    |          |          |          |          | -3.5004  |
| WARS2    |          |          |          |          | -3.50336 |
| CDK5RAP3 |          |          |          |          | -3.50359 |
| ZPR1     |          |          |          |          | -3.50776 |
| ZNF24    |          |          |          |          | -3.5127  |
| TMX1     |          |          |          |          | -3.52259 |
| SRSF8    |          |          |          |          | -3.55126 |
| CSTF2T   |          |          | -3.555   |          |          |
| DYNC1I2  |          |          |          | -3.56886 |          |
| RBBP6    |          |          | -3.59617 |          |          |
| UFL1     |          |          |          |          | -3.62016 |
| ZNF326   | -1.97816 | -1.64671 |          |          |          |
| DIS3     |          | -1.90975 |          | -1.72691 |          |
| XRCC1    |          |          | -1.1455  | -2.49524 |          |
| HOXA13   |          |          |          |          | -3.64491 |
| HOXC13   |          |          |          |          | -3.64491 |
| TXLNG    |          |          |          | -3.66183 |          |
| ACADM    |          |          |          | -2.56152 | -1.11827 |
| MLLT4    | -1.41889 | -1.13276 |          |          | -1.13229 |
| HECTD3   |          |          |          |          | -3.72409 |
| CLTB     |          |          |          |          | -3.73507 |
| HIBADH   |          |          |          | -3.74184 |          |
| PPP4C    |          |          |          |          | -3.78508 |
| RPS6KA3  |          |          |          |          | -3.79231 |
| SURF4    | -2.70421 |          | -1.09424 |          |          |
| TRIP12   |          |          | -2.17492 | -1.6313  |          |
| EIF2AK2  |          |          |          |          | -3.80849 |
| TFIP11   |          |          |          |          | -3.81579 |
| PPFIA1   |          |          |          | -3.82195 |          |
| CALU     |          |          |          |          | -3.82231 |
| CNBP     |          |          | -2.31735 | -1.51214 |          |
| CYB5B    | -2.13833 |          |          | -1.69774 |          |
| NME4     |          |          |          | -3.85053 |          |

|           |          |          |          |          |          |
|-----------|----------|----------|----------|----------|----------|
| RPTOR     |          |          |          | -3.85209 |          |
| XPO1      |          |          |          | -3.86861 |          |
| ARL8B     |          |          |          | -3.89402 |          |
| ADO       |          |          |          | -3.90859 |          |
| SUMF2     |          |          | -2.25588 |          | -1.65465 |
| PGRMC2    |          | -2.21803 |          | -1.70362 |          |
| PARN      |          |          |          | -3.93113 |          |
| SYNCRIP   | -2.19762 | -1.743   |          |          |          |
| PDHB      |          |          | -1.05296 | -2.89142 |          |
| UBR7      |          |          |          | -3.95849 |          |
| BLM       |          |          |          |          | -3.98184 |
| RECQL     |          |          |          |          | -3.98184 |
| PPM1A     |          | -4.01172 |          |          |          |
| PPM1B     |          | -4.01172 |          |          |          |
| EZH2      |          |          | -4.01851 |          |          |
| H2AFZ     | -2.48235 |          | -1.54095 |          |          |
| CPOX      |          |          | -4.03028 |          |          |
| MAP4      |          |          |          | -4.03182 |          |
| MEAF6     |          |          | -4.03853 |          |          |
| EXOC4     |          |          |          | -4.05024 |          |
| POLR2C    |          |          |          | -4.06338 |          |
| CIRBP     | -1.68602 |          | -2.3889  |          |          |
| LIN28B    |          |          |          |          | -4.07615 |
| C4orf27   |          |          |          |          | -4.10092 |
| FASN      |          |          |          |          | -4.12602 |
| GNG12     |          |          |          | -4.15533 |          |
| CALR      |          |          |          |          | -4.15868 |
| KIAA0101  |          |          | -4.17962 |          |          |
| EEF1E1    |          |          |          |          | -4.18144 |
| NDUFC2    |          |          |          |          | -4.18403 |
| PRPS2     |          |          |          |          | -4.18426 |
| PDHA1     | -2.21009 |          | -1.98701 |          |          |
| SCAF8     |          |          |          | -4.19766 |          |
| PPA2      | -1.49032 | -1.38529 |          |          | -1.32398 |
| ACAA1     | -1.47217 | -1.15649 | -1.57531 |          |          |
| TMA16     |          | -4.22697 |          |          |          |
| TALDO1    |          | -4.23275 |          |          |          |
| CCDC43    |          | -4.24178 |          |          |          |
| TBL3      | -1.54275 |          |          | -2.70846 |          |
| TRUB1     |          |          |          | -4.2708  |          |
| HSP90AA2P |          |          |          |          | -4.27412 |
| CYB5A     |          | -2.33338 | -1.9424  |          |          |
| RPL39     |          |          | -4.28311 |          |          |
| RPL39P5   |          |          | -4.28311 |          |          |
| RPL36     |          |          |          | -4.2835  |          |

|          |          |          |          |          |          |
|----------|----------|----------|----------|----------|----------|
| ANKFY1   |          |          |          | -4.29324 |          |
| NDUFA8   |          | -2.33454 |          | -1.9783  |          |
| ARHGAP17 |          |          |          |          | -4.31711 |
| ELP2     |          |          | -4.32408 |          |          |
| LBR      |          |          |          | -4.33215 |          |
| SMARCD1  |          |          |          | -4.34978 |          |
| OXSM     | -2.39439 |          |          | -1.95754 |          |
| UQCR10   | -2.00223 | -2.35803 |          |          |          |
| SLC25A11 | -1.86443 | -1.10765 |          |          | -1.39476 |
| UQCRFS1  |          | -2.07789 | -2.29524 |          |          |
| CHRA1    | -1.27144 | -1.74736 | -1.36014 |          |          |
| COX15    | -2.11758 |          |          |          | -2.26192 |
| FKBP8    |          |          | -1.01069 |          | -3.37283 |
| TSFM     |          |          |          | -4.38379 |          |
| VTA1     | -2.055   | -2.33322 |          |          |          |
| HDAC3    |          |          |          | -4.38967 |          |
| RPL9     |          | -2.27986 |          |          | -2.13205 |
| AMOTL2   |          |          |          |          | -4.42853 |
| TRUB1    |          | -4.43838 |          |          |          |
| MAGED2   | -2.06713 | -2.3916  |          |          |          |
| TCEB2    |          |          |          |          | -4.46867 |
| U2AF1    |          | -4.47581 |          |          |          |
| PHF3     |          |          | -2.11051 |          | -2.38098 |
| ZFR      |          |          |          | -4.4941  |          |
| LRBA     |          | -4.51033 |          |          |          |
| SH3BGR13 |          |          |          | -4.52144 |          |
| AGAP3    |          |          |          | -4.52213 |          |
| NFKB1    |          |          |          |          | -4.53294 |
| JUP      |          |          | -1.78991 |          | -2.75553 |
| SFXN1    |          |          |          |          | -4.54743 |
| XPNPEP1  |          |          |          |          | -4.55798 |
| SF3B1    |          |          |          |          | -4.57216 |
| CASP3    |          |          |          | -4.57589 |          |
| RPS29    |          |          |          |          | -4.57615 |
| U2AF1L4  |          |          | -2.777   |          | -1.80043 |
| ABCD3    |          | -2.26008 | -2.32592 |          |          |
| PLAA     |          |          |          |          | -4.59461 |
| YWHAB    |          |          |          | -4.5992  |          |
| TIMM13   |          |          |          | -4.60816 |          |
| TBC1D15  |          |          |          | -4.60841 |          |
| CEBPZ    |          | -3.38003 | -1.25068 |          |          |
| DCAF7    |          | -2.92246 |          | -1.71666 |          |
| KRT76    |          |          |          | -4.64438 |          |
| CTBP1    |          |          |          | -4.64995 |          |
| SDE2     |          |          | -4.65022 |          |          |

|                |          |          |          |          |          |
|----------------|----------|----------|----------|----------|----------|
| NOL7           |          |          |          | -4.66555 |          |
| GMPPA          |          |          |          | -4.66765 |          |
| NT5DC1         |          |          |          | -4.67206 |          |
| DDX18          | -1.51537 | -1.37748 |          | -1.79523 |          |
| EIF2B4         |          |          |          | -4.70733 |          |
| ERP29          |          | -1.11872 |          | -3.59091 |          |
| PDE12          | -2.15025 | -2.56032 |          |          |          |
| THUMPD3        |          |          |          | -4.71389 |          |
| KRT26          |          |          |          | -4.71562 |          |
| MAEA           |          |          |          | -4.72551 |          |
| PPAN-P2RY11    |          |          |          | -4.7386  |          |
| SRA1           |          |          |          | -4.76655 |          |
| TOMM20         | -2.21888 |          |          |          | -2.55522 |
| PNO1           |          |          |          | -4.78687 |          |
| MCM5           | -2.79547 |          |          | -2.01653 |          |
| VHL            |          |          | -4.81411 |          |          |
| AP3S1          |          |          |          | -4.81824 |          |
| POLDIP3        | -2.49825 |          |          |          | -2.32863 |
| TMEM33         |          |          |          | -4.82711 |          |
| TPM2           |          |          |          | -4.82843 |          |
| EIF3F          | -1.62669 | -1.40272 |          | -1.80361 |          |
| HNRNPUL2-BSCL2 |          | -1.13266 |          | -2.33118 | -1.37867 |
| CD81           | -2.13584 | -2.71173 |          |          |          |
| NNT            |          | -2.23606 |          |          | -2.61283 |
| USP39          |          |          |          | -4.84904 |          |
| RBM19          |          | -4.85682 |          |          |          |
| ASPH           | -2.24851 | -2.63497 |          |          |          |
| AHSG           |          |          |          | -4.88612 |          |
| TOR1AIP1       |          |          |          | -4.8882  |          |
| USP34          | -2.82085 |          | -2.08015 |          |          |
| PROSC          |          |          |          | -4.90439 |          |
| RCN2           | -2.22305 |          |          |          | -2.73821 |
| GGCT           |          |          |          | -4.96207 |          |
| RBM14          | -2.04076 | -2.92151 |          |          |          |
| NSA2           |          |          | -4.9708  |          |          |
| NVL            |          |          | -4.97567 |          |          |
| PSMC6          |          | -4.99497 |          |          |          |
| RTN1           | -3.29104 |          |          | -1.70514 |          |
| DNAJC7         |          |          | -1.8517  | -3.18239 |          |
| DHX29          |          |          |          | -5.04615 |          |
| TAF15          | -1.11609 | -1.711   |          | -2.22342 |          |
| BAX            |          |          |          | -5.05475 |          |
| RABL3          |          |          |          | -5.05571 |          |
| SLC25A31       | -1.3977  |          |          |          | -3.70341 |
| HNRNPL         | -2.15736 |          |          |          | -2.96078 |

|          |          |          |          |          |          |
|----------|----------|----------|----------|----------|----------|
| CHMP2A   |          |          |          | -5.12912 |          |
| GARS     |          | -5.1418  |          |          |          |
| PRKCSH   |          |          |          | -3.88253 | -1.26171 |
| RALY     |          | -1.28507 |          | -1.75179 | -2.13179 |
| MT-CO2   | -2.41993 | -2.77347 |          |          |          |
| NDUFV2   | -1.26997 | -1.36095 |          | -2.57023 |          |
| PEF1     |          | -5.20455 |          |          |          |
| TPT1P8   |          | -5.22209 |          |          |          |
| KRT13    |          |          |          | -5.25169 |          |
| ACAD9    |          |          | -2.15766 | -3.10984 |          |
| RAVER1   |          |          |          |          | -5.30869 |
| NAA40    |          |          |          |          | -5.33189 |
| TARDBP   | -1.19714 |          |          |          | -4.18102 |
| TMED2    |          |          |          |          | -5.38251 |
| SAFB     | -2.16012 | -1.3745  |          | -1.85451 |          |
| TMEM33   |          | -5.39322 |          |          |          |
| CPD      |          | -2.70313 | -2.70265 |          |          |
| TRUB1    |          |          |          |          | -5.41943 |
| TAGAP    |          |          |          | -5.42428 |          |
| MAP2K3   |          |          |          |          | -5.43039 |
| MAP2K6   |          |          |          |          | -5.43039 |
| SH3BGR13 |          | -5.44046 |          |          |          |
| COPS3    |          | -5.48223 |          |          |          |
| BCL2L13  |          | -3.32675 |          | -2.17674 |          |
| ATAD3A   | -1.60541 | -1.15037 | -1.52031 |          | -1.24343 |
| ATP6V0C  | -2.73912 | -2.78425 |          |          |          |
| BCAT2    |          |          | -1.80275 | -1.56661 | -2.16978 |
| GEMIN4   |          | -5.54959 |          |          |          |
| ARID1A   |          | -5.56581 |          |          |          |
| HNRNPH1  |          |          |          |          | -5.59638 |
| THOC2    |          | -5.59912 |          |          |          |
| BCKDHA   |          | -5.63313 |          |          |          |
| TMEM9    |          | -5.68152 |          |          |          |
| TMEM9B   |          | -5.68152 |          |          |          |
| PLIN3    |          | -1.11877 | -1.985   | -2.60175 |          |
| RRP8     | -1.70817 |          |          |          | -4.00527 |
| CD99     |          | -5.71952 |          |          |          |
| U2SURP   | -2.10316 |          |          | -3.62931 |          |
| RPS25    | -5.80139 |          |          |          |          |
| RUVBL1   |          |          | -2.66818 | -1.8059  | -1.33291 |
| ATAD5    |          |          | -5.81575 |          |          |
| CD59     |          |          |          | -2.14399 | -3.67455 |
| EHMT1    |          |          | -5.84813 |          |          |
| MT1X     |          | -5.85808 |          |          |          |
| MT2A     |          | -5.85808 |          |          |          |



|         |          |          |          |          |          |
|---------|----------|----------|----------|----------|----------|
| NUP205  |          |          | -3.55359 |          | -2.33282 |
| TRA2B   |          | -5.89274 |          |          |          |
| KLC2    |          |          | -2.66411 |          | -3.23637 |
| HSPD1   |          | -2.79805 |          | -3.12388 |          |
| HAX1    |          | -2.69389 |          |          | -3.2492  |
| DDX47   |          | -2.62691 |          |          | -3.32607 |
| SMARCA4 |          |          | -2.73311 | -3.22152 |          |
| C2orf47 | -5.96365 |          |          |          |          |
| DHX40   |          |          |          | -6.00532 |          |
| KDM2A   |          |          |          | -6.05091 |          |
| RAP2A   | -2.07935 | -4.01827 |          |          |          |
| RAP2B   | -2.07935 | -4.01827 |          |          |          |
| RAP2C   | -2.07935 | -4.01827 |          |          |          |
| STRBP   |          |          |          | -3.01574 | -3.1323  |
| NOL6    | -2.55517 |          |          | -3.61345 |          |
| PYCR2   |          |          | -1.55106 | -4.66974 |          |
| TMEM230 |          |          |          | -3.00098 | -3.23006 |
| NOP2    |          |          | -1.54071 | -1.62757 | -3.07817 |
| TIMM50  |          |          | -1.08509 |          | -5.17657 |
| MRPL48  | -2.13757 |          | -1.9629  |          | -2.27709 |
| HMGCS1  |          | -1.30097 |          | -1.8795  | -3.21101 |
| TMEM261 |          | -4.09466 | -2.30723 |          |          |
| COX7A2L | -2.06724 | -2.24255 |          |          | -2.1101  |
| RSL1D1  |          |          |          | -3.17901 | -3.25101 |
| TXN2    |          | -2.421   | -1.84366 | -2.16848 |          |
| IPO5    |          |          |          | -3.14492 | -3.30814 |
| FAM21A  |          |          |          | -3.17259 | -3.29602 |
| FAM21B  |          |          |          | -3.17259 | -3.29602 |
| FAM21C  |          |          |          | -3.17259 | -3.29602 |
| COX7A2  | -2.07222 | -2.21869 |          |          | -2.20402 |
| RFC5    |          | -5.41493 | -1.10643 |          |          |
| NIT1    |          |          | -1.2565  | -5.35202 |          |
| NOSIP   |          |          |          | -3.5572  | -3.06229 |
| MTCH2   |          | -1.34063 | -1.57513 | -2.35446 | -1.38127 |
| STARD9  |          |          |          | -3.06675 | -3.61982 |
| FOXK2   |          |          |          | -3.53532 | -3.1841  |
| CSTF1   |          |          |          | -3.15913 | -3.56433 |
| NAT10   | -2.25839 |          | -1.93023 | -2.54465 |          |
| DHRS7   | -2.28325 |          |          | -2.20695 | -2.26981 |
| SPAG9   |          |          |          | -3.06006 | -3.71783 |
| PTBP1   | -3.70981 |          |          | -3.09116 |          |
| NELFE   |          |          |          | -3.10898 | -3.69972 |
| PAWR    |          |          |          | -3.30653 | -3.54287 |
| RPL34   |          |          |          | -3.53235 | -3.33301 |
| EXOC8   |          |          |          | -3.3176  | -3.55322 |

|          |          |          |          |          |          |
|----------|----------|----------|----------|----------|----------|
| LTV1     |          |          |          | -3.31905 | -3.55864 |
| KHDRBS2  | -2.10822 |          |          | -4.77704 |          |
| SUMO2    |          |          |          | -3.14314 | -3.74358 |
| WFS1     |          |          |          | -3.12814 | -3.78196 |
| MECP2    |          |          |          |          | -6.92443 |
| COA3     |          |          |          | -3.80588 | -3.15464 |
| DDX39A   |          |          |          | -3.01825 | -3.94828 |
| ASH1L    |          |          | -2.69874 | -4.29071 |          |
| MDN1     |          |          |          | -3.63795 | -3.36677 |
| RFC4     |          |          |          | -3.41543 | -3.62315 |
| MAGT1    |          |          |          | -3.27053 | -3.77396 |
| PHIP     |          |          |          |          | -7.05966 |
| ESYT2    |          |          |          | -3.42465 | -3.64985 |
| CMC2     | -2.21818 | -2.38715 |          |          | -2.47959 |
| CNN2     |          |          |          | -3.18052 | -3.95121 |
| PTMA     | -1.395   | -5.75057 |          |          |          |
| WDR36    |          | -2.84368 |          | -4.30302 |          |
| LMNB2    | -2.59598 | -2.65637 |          | -1.89723 |          |
| SLC4A1AP |          |          |          | -3.00956 | -4.1833  |
| RHOA     |          |          |          | -3.13484 | -4.07863 |
| RHOC     |          |          |          | -3.13484 | -4.07863 |
| TPX2     | -3.08298 | -4.16594 |          |          |          |
| NDUFV1   | -2.99511 |          | -2.43244 | -1.84207 |          |
| YWHAG    |          |          |          | -3.39118 | -3.87865 |
| INTS7    |          |          |          | -4.07894 | -3.1932  |
| AP2B1    |          |          |          | -3.24324 | -4.07281 |
| CLNS1A   |          |          |          | -3.11551 | -4.20326 |
| SLC7A5   |          |          |          | -3.17012 | -4.14879 |
| UQCRH    | -1.45192 | -1.17514 |          | -4.70018 |          |
| RAB25    |          |          |          | -3.17212 | -4.15641 |
| RRBP1    |          |          |          | -3.56851 | -3.77629 |
| TBCA     |          |          | -2.27609 |          | -5.09262 |
| IDH3A    |          |          |          | -3.30479 | -4.07024 |
| NDUFAB1  |          |          | -2.67535 | -2.03737 | -2.66465 |
| UQCRB    | -2.30159 | -2.38262 |          |          | -2.69701 |
| NCDN     |          |          |          | -3.49103 | -3.89492 |
| PTMS     |          |          |          | -3.7107  | -3.70088 |
| FKBP10   |          |          | -3.55708 | -2.18462 | -1.69113 |
| AIP      |          |          |          | -3.45806 | -3.97713 |
| PPP1R12A |          | -5.73357 |          |          | -1.75707 |
| RPL23    |          |          |          | -3.24746 | -4.25723 |
| WDR44    |          |          |          | -3.24214 | -4.26653 |
| CSNK1E   |          |          |          | -3.12889 | -4.39302 |
| RBM17    | -2.19874 | -2.2254  |          |          | -3.10311 |
| RPS4X    |          |          |          | -3.34056 | -4.19123 |

|          |          |          |          |          |          |
|----------|----------|----------|----------|----------|----------|
| RPL29    |          |          |          | -3.28229 | -4.2508  |
| TIA1     |          |          |          | -3.12812 | -4.4088  |
| KIAA0415 |          |          |          | -3.64867 | -3.89251 |
| ATP6AP2  | -2.33239 | -2.67079 |          |          | -2.53825 |
| MT-ATP6  |          |          |          | -2.29688 | -5.24547 |
| WDR41    |          | -4.086   |          | -3.47256 |          |
| GIN52    |          |          |          | -3.3788  | -4.20023 |
| UQCRHL   |          | -2.44412 |          | -5.14707 |          |
| TTC19    |          | -4.16135 |          |          | -3.4374  |
| ITPA     |          |          |          | -3.45766 | -4.16155 |
| ABHD14B  |          |          |          | -3.10897 | -4.52472 |
| WNK1     |          |          |          | -3.36277 | -4.29584 |
| SLC25A3  | -1.82749 | -1.57369 | -4.26902 |          |          |
| SAMM50   | -2.2448  | -2.26097 | -1.07063 |          | -2.17178 |
| MTX1     |          |          |          | -3.68037 | -4.07373 |
| CKAP2    |          |          |          | -3.47532 | -4.27892 |
| PAF1     |          | -4.00318 |          |          | -3.78314 |
| PRPF31   |          |          |          | -3.39862 | -4.41143 |
| LIMA1    |          |          | -1.84207 | -3.71416 | -2.28907 |
| MCM4     | -2.25471 | -5.59441 |          |          |          |
| AP3B2    |          | -4.5168  |          |          | -3.34889 |
| HRNR     |          |          |          | -3.05084 | -4.81883 |
| CD2BP2   |          |          |          | -3.43418 | -4.45231 |
| HNRNPK   |          |          |          | -4.12255 | -3.77508 |
| RBM26    |          |          |          | -4.73399 | -3.16759 |
| ILF3     |          | -1.70511 |          | -4.70543 | -1.49148 |
| PDCD5    | -2.12104 | -5.8223  |          |          |          |
| GTPBP6   |          |          |          | -3.39885 | -4.54457 |
| PLCG1    |          | -7.96511 |          |          |          |
| TRIP6    |          | -4.24489 |          | -3.7342  |          |
| AKR1B15  |          |          |          | -3.45482 | -4.53834 |
| SLAIN1   |          |          |          | -3.95419 | -4.09425 |
| PEX19    |          |          |          | -3.47768 | -4.5816  |
| PTTG1IP  |          |          |          | -3.8285  | -4.23669 |
| CDC37    |          |          | -2.66621 |          | -5.42974 |
| GPR180   |          | -4.13587 |          |          | -3.96937 |
| YWHAZ    |          |          |          | -4.42053 | -3.69965 |
| FARSA    |          |          | -4.02699 | -4.1994  |          |
| GNL2     |          | -4.31173 |          | -3.93002 |          |
| PSMD4    |          |          |          | -4.61839 | -3.62627 |
| LDHAL6A  |          | -8.25561 |          |          |          |
| MT1G     | -2.40236 | -5.85808 |          |          |          |
| MAP1B    |          | -4.05975 |          |          | -4.20494 |
| DNAJC10  |          | -4.30739 |          | -3.96035 |          |
| DDX27    | -3.1148  |          | -3.22569 | -1.92927 |          |

|          |          |          |          |          |          |
|----------|----------|----------|----------|----------|----------|
| LSM4     |          | -5.25875 |          |          | -3.01484 |
| RAB11A   |          |          |          | -5.04698 | -3.23679 |
| EIF3K    |          | -3.00265 |          | -2.74588 | -2.55473 |
| H3F3C    | -2.75761 |          |          | -2.36342 | -3.19092 |
| RABGGTB  |          |          |          | -3.53706 | -4.7778  |
| SRP9     |          |          |          | -4.74538 | -3.58857 |
| NKAPL    |          | -4.88678 |          | -3.46807 |          |
| PLAA     |          | -4.31177 |          | -4.07584 |          |
| PTGES2   |          |          |          | -3.66506 | -4.72322 |
| YWHAQ    |          |          |          | -4.08177 | -4.35623 |
| HMOX1    |          | -5.7123  | -2.73206 |          |          |
| HIST1H1C |          |          | -2.40476 | -6.08997 |          |
| COX6C    | -2.81842 |          | -1.71594 |          | -3.96451 |
| CKAP5    |          |          |          | -3.74204 | -4.76417 |
| GUK1     |          | -4.49596 |          |          | -4.06162 |
| SBDS     |          | -4.84746 |          | -3.72805 |          |
| AMOTL1   |          | -4.14956 |          |          | -4.42853 |
| ANXA2    |          | -4.839   |          | -3.74508 |          |
| BTF3     |          | -5.63142 |          | -2.96992 |          |
| CBS      | -1.63566 | -5.75762 |          |          | -1.23532 |
| COX6A1   | -3.98046 | -4.65076 |          |          |          |
| AGO1     |          |          |          | -8.65215 |          |
| AGO2     |          |          |          | -8.65215 |          |
| SRSF7    |          |          | -1.13101 | -3.43668 | -4.08921 |
| PDIA4    |          |          |          | -3.93264 | -4.74989 |
| SLC25A1  | -1.50294 | -5.60842 | -1.60133 |          |          |
| CISD2    |          | -2.35429 | -2.07909 |          | -4.31148 |
| GART     |          |          |          | -5.25238 | -3.51233 |
| MAP2K2   |          | -4.05906 |          |          | -4.71988 |
| GIN51    |          | -4.85955 |          | -3.95648 |          |
| PUM1     |          |          |          | -4.8133  | -4.01103 |
| PUM2     |          |          |          | -4.8133  | -4.01103 |
| TROVE2   |          | -4.14842 |          |          | -4.68103 |
| CYC1     | -2.15197 | -2.23469 |          | -1.92864 | -2.52988 |
| TMUB1    |          | -5.05682 |          | -3.82673 |          |
| CHEK1    |          | -4.51662 |          | -4.38117 |          |
| MRPS14   |          |          | -2.12948 | -3.51832 | -3.25495 |
| C1orf131 |          | -4.53457 |          |          | -4.39226 |
| CDK9     |          | -4.87376 |          | -4.0882  |          |
| IST1     |          | -5.13033 |          | -3.8535  |          |
| CCDC40   |          |          | -4.82984 |          | -4.16978 |
| GLMN     |          |          |          | -5.04418 | -3.97501 |
| HP1BP3   |          |          | -3.14241 | -5.88943 |          |
| SAP18    | -3.49771 |          | -2.18656 |          | -3.35724 |
| RPL8     |          | -4.84678 |          | -4.20286 |          |

|              |          |          |          |          |          |
|--------------|----------|----------|----------|----------|----------|
| GTF3C2       |          | -4.60952 |          | -4.45098 |          |
| H3F3A        | -2.12328 | -2.23795 |          | -4.71127 |          |
| H3F3B        | -2.12328 | -2.23795 |          | -4.71127 |          |
| SYNGR1       |          | -5.02074 |          | -4.07627 |          |
| OGT          |          | -4.92156 | -4.24194 |          |          |
| BRD4         |          | -5.02508 | -4.14031 |          |          |
| RPS15        |          |          |          | -4.86189 | -4.30683 |
| NEFH         | -2.87052 | -4.17303 |          |          | -2.16106 |
| NEFL         | -2.87052 | -4.17303 |          |          | -2.16106 |
| TPM3         |          | -4.39601 |          |          | -4.82147 |
| HBA1         | -2.50671 | -2.53685 |          | -1.56821 | -2.62687 |
| SUB1         |          | -5.57142 |          |          | -3.69733 |
| VDAC2        | -2.30841 | -2.82183 | -1.81102 |          | -2.38939 |
| RANBP9       |          |          |          | -4.73833 | -4.60493 |
| RRAS2        |          |          |          | -4.17827 | -5.17082 |
| DKFZp434B156 |          | -4.63979 |          |          | -4.71204 |
| WDR92        |          | -4.63979 |          |          | -4.71204 |
| SEC62        |          |          |          | -4.84079 | -4.55023 |
| VDAC1        | -2.53362 | -2.92457 | -1.78329 |          | -2.15886 |
| ST13         |          |          |          | -4.78378 | -4.63474 |
| SOAT1        |          | -3.49965 | -3.48529 |          | -2.46681 |
| RUFY2        |          | -4.60552 |          | -4.88068 |          |
| GPATCH11     |          |          |          |          | -9.49448 |
| RBM39        |          | -4.49496 | -3.17059 | -1.83783 |          |
| LMNA         | -3.79581 |          | -5.72582 |          |          |
| RAC2         |          | -5.57203 |          | -3.96436 |          |
| RHOJ         |          | -5.57203 |          | -3.96436 |          |
| RHOQ         |          | -5.57203 |          | -3.96436 |          |
| CEP41        |          | -5.141   |          |          | -4.42394 |
| YLPM1        | -2.45473 | -5.40533 |          |          | -1.71539 |
| SF3A2        |          | -4.4419  |          |          | -5.13753 |
| CTBP2        |          |          |          | -4.49793 | -5.16507 |
| PPHLN1       |          | -5.10481 |          |          | -4.57532 |
| HMGA2        |          | -3.65848 | -6.02335 |          |          |
| TNPO3        |          |          |          |          | -9.70358 |
| HBA2         | -2.72749 | -2.92646 |          | -1.61603 | -2.4367  |
| TRIAP1       |          | -5.35211 |          | -4.35707 |          |
| RPS27L       |          | -5.29828 |          | -4.42754 |          |
| ARL2BP       |          | -4.7356  |          |          | -4.99929 |
| HM13         |          | -5.05068 |          |          | -4.69261 |
| MGST3        | -3.14725 | -2.9052  |          | -1.57709 | -2.11466 |
| DNAJB2       |          | -4.84711 |          |          | -4.9008  |
| DNAJB8       |          | -4.84711 |          |          | -4.9008  |
| DNAJC11      | -3.65274 | -3.00881 |          |          | -3.1818  |
| PPARGC1A     |          |          |          |          | -9.84385 |

|         |          |          |          |          |          |
|---------|----------|----------|----------|----------|----------|
| CLTA    |          | -5.30729 |          | -4.54192 |          |
| HGS     |          | -5.25833 |          | -4.5978  |          |
| SF3B3   |          |          |          | -4.62915 | -5.25897 |
| EPS15L1 |          | -2.87605 | -7.09056 |          |          |
| PES1    |          | -5.55959 |          | -4.42919 |          |
| CRYZL1  |          |          |          | -4.83561 | -5.18759 |
| SKIV2L2 |          |          |          | -4.69759 | -5.35572 |
| MEPCE   |          | -5.42665 |          | -4.63997 |          |
| TFRC    |          | -5.57094 |          | -4.49902 |          |
| RBM28   |          |          |          | -3.00508 | -7.07548 |
| NUP98   |          | -5.01518 |          | -5.07406 |          |
| KPNB1   | -3.16513 |          |          | -3.0591  | -3.90285 |
| FSCN1   |          | -5.6395  |          | -4.49059 |          |
| DDX4    |          | -4.80487 |          |          | -5.36272 |
| MRPS28  |          | -5.12944 |          |          | -5.08914 |
| LSM8    |          |          |          | -4.97028 | -5.25816 |
| CPSF7   |          | -5.69817 |          | -4.5391  |          |
| RAB1C   | -5.91716 |          | -2.5459  | -1.79511 |          |
| NCL     |          | -5.16809 |          |          | -5.13221 |
| STX7    |          | -5.65907 |          | -4.68951 |          |
| MT1E    |          | -5.65408 |          | -4.70997 |          |
| MT1M    |          | -5.65408 |          | -4.70997 |          |
| CDCA8   |          |          | -5.2425  |          | -5.13705 |
| CHAMP1  | -2.23695 |          | -2.9058  | -2.21022 | -3.02848 |
| WDR18   |          | -5.24793 |          |          | -5.16225 |
| RRP12   | -2.08871 | -4.06382 |          |          | -4.26062 |
| GNG5    |          | -5.57425 |          | -4.84613 |          |
| FAM175B |          |          |          | -5.1112  | -5.32811 |
| SNW1    |          | -5.64928 |          | -4.80456 |          |
| PLD3    |          | -5.40644 |          |          | -5.06644 |
| RAB11B  |          |          |          | -5.04698 | -5.45634 |
| DDX56   |          |          | -5.34119 | -5.17294 |          |
| WHSC1   |          | -5.16936 |          |          | -5.36385 |
| VASP    |          | -5.70242 |          | -4.8337  |          |
| RNF2    | -2.33388 | -2.36074 |          | -1.98143 | -3.86897 |
| EIF4G2  |          | -5.48206 |          |          | -5.08561 |
| MRPL17  |          |          | -1.97804 | -3.95169 | -4.64126 |
| HMGN4   |          |          | -2.72288 | -7.87682 |          |
| MTDH    | -1.90429 |          |          | -3.49204 | -5.22578 |
| MOV10   |          | -5.68855 |          | -4.93964 |          |
| UBE2Z   |          | -5.697   |          | -4.94406 |          |
| RPL36AL |          | -5.67877 |          | -4.96381 |          |
| 39692   |          | -5.68145 |          | -4.96534 |          |
| UBE2M   |          | -4.54843 | -1.93107 | -4.1678  |          |
| EDC3    |          | -5.75713 |          | -4.90637 |          |

|         |          |          |          |          |          |
|---------|----------|----------|----------|----------|----------|
| COX6B1  |          | -5.9008  |          | -4.83895 |          |
| SLC1A5  |          | -5.35869 |          |          | -5.40056 |
| BZW1    |          | -5.44741 |          |          | -5.33136 |
| RBMX    |          | -5.53896 |          |          | -5.2477  |
| COX7C   |          | -2.76849 | -2.31884 | -1.65038 | -4.06832 |
| DLST    | -2.48366 | -2.4251  | -2.5143  |          | -3.39986 |
| TCOF1   | -1.45164 | -4.49974 |          |          | -4.93249 |
| POLB    |          | -7.79241 | -3.1356  |          |          |
| SNRPC   |          | -5.67795 |          |          | -5.37456 |
| MRPS18B | -2.90244 | -2.86728 |          | -2.89248 | -2.41458 |
| SUMO3   |          | -4.06265 |          | -3.18767 | -3.89006 |
| UQCRCQ  | -2.11449 |          | -4.67424 | -1.56468 | -2.81289 |
| GAA     |          | -4.06222 |          | -3.24698 | -3.85976 |
| HK1     |          | -4.09056 |          | -3.54464 | -3.55586 |
| SUGP2   |          | -4.41057 |          | -3.24987 | -3.54935 |
| RBX1    |          | -5.77827 |          |          | -5.44682 |
| RPL28   |          | -4.23497 |          | -3.82166 | -3.18338 |
| ZMYND8  |          | -7.02508 | -4.37559 |          |          |
| RPL31   |          | -4.06908 |          | -3.75689 | -3.62684 |
| HADHB   |          | -4.07579 |          | -3.30736 | -4.07987 |
| PELP1   |          | -4.07796 |          | -3.23482 | -4.15884 |
| RPS11   |          | -4.09635 |          | -3.86837 | -3.59124 |
| ARF4    |          | -4.09117 |          | -3.37664 | -4.0977  |
| TEX264  |          | -5.50303 |          | -4.673   | -1.51501 |
| SON     |          |          | -1.91385 | -4.93533 | -4.85748 |
| RAB1B   |          |          | -2.13808 | -5.01685 | -4.60889 |
| CHP1    |          | -5.28051 |          | -3.95732 | -2.56045 |
| FAH     |          | -5.1045  |          | -3.01662 | -3.75371 |
| DDX54   |          | -4.23121 |          | -3.12502 | -4.52775 |
| NOLC1   | -1.35961 | -5.73305 |          | -4.85054 |          |
| RPL36A  |          | -4.42927 |          | -4.15136 | -3.36456 |
| P3H1    |          | -4.0658  |          | -3.24516 | -4.64703 |
| LEPRE1  |          | -4.0658  |          | -3.49117 | -4.41562 |
| APIP    |          | -5.75006 |          |          | -6.28807 |
| DPP9    |          | -4.628   |          | -3.3206  | -4.09365 |
| PPIH    |          | -4.06963 |          | -4.36541 | -3.63771 |
| COASY   |          | -4.06602 |          | -3.46803 | -4.55141 |
| MARCKS  |          | -4.3254  |          | -3.57386 | -4.22823 |
| NIN     |          | -4.08223 |          | -3.45684 | -4.63058 |
| SUCLG1  |          | -4.25366 |          | -3.38215 | -4.55791 |
| NDUFA2  |          |          |          | -5.37595 | -6.82106 |
| SAR1B   |          | -4.30769 |          | -3.1988  | -4.73889 |
| ATXN2L  |          | -5.6015  |          | -4.98815 | -1.71639 |
| MPP6    |          | -4.22852 |          | -3.31354 | -4.81562 |
| REXO2   |          | -4.14807 |          | -3.63487 | -4.6216  |

|          |          |          |          |          |          |
|----------|----------|----------|----------|----------|----------|
| SEC31A   |          |          | -7.1201  |          | -5.3122  |
| TSPAN6   | -3.15139 | -3.43666 | -2.16084 |          | -3.84898 |
| MINOS1   | -2.92028 | -3.00144 | -1.87482 | -1.84714 | -2.97948 |
| UTS2     |          | -4.74526 |          | -3.31108 | -4.57745 |
| TOMM40   | -3.06733 | -2.23684 | -4.87165 |          | -2.46254 |
| NDRG3    |          | -6.44112 | -6.21141 |          |          |
| RPS23    |          | -5.02267 |          | -4.46723 | -3.22179 |
| TIMM9    | -2.7743  | -3.23198 | -1.96532 | -1.54536 | -3.19724 |
| ATP5D    |          | -4.71738 |          | -3.42953 | -4.59229 |
| RCN1     |          | -5.86473 | -5.18567 | -1.7513  |          |
| SRPK3    |          | -4.3332  |          | -3.73565 | -4.73814 |
| POR      |          | -4.53556 |          | -3.72029 | -4.60571 |
| LDHC     |          | -4.32451 |          | -3.8309  | -4.71956 |
| SEC63    |          | -4.76043 |          | -3.75306 | -4.40971 |
| BRD2     | -2.34625 | -2.28683 | -3.44393 | -1.57751 | -3.31565 |
| EIF3G    |          | -4.03649 |          | -4.68852 | -4.31772 |
| GSTM2    |          | -4.6047  |          | -3.66107 | -4.8046  |
| GSTM5    |          | -4.6047  |          | -3.66107 | -4.8046  |
| PCBP2    |          | -4.24451 |          | -4.34613 | -4.57209 |
| RPL10    | -2.01409 | -5.72739 |          |          | -5.44023 |
| FAM136A  | -2.05619 | -4.64206 | -1.89956 |          | -4.64167 |
| STIM2    |          | -4.89143 |          | -3.65666 | -4.77094 |
| GIPC1    |          | -4.5397  |          | -3.82047 | -4.97017 |
| DHCR7    |          | -4.39681 |          | -4.15341 | -4.79363 |
| LAMP1    |          | -4.47683 |          | -4.07177 | -4.80425 |
| AKAP12   |          | -4.41787 |          | -4.0751  | -4.91019 |
| DEK      |          | -5.78112 | -1.94338 | -1.8031  | -3.89237 |
| GFAP     | -2.64665 | -4.53738 | -3.99645 | -2.26319 |          |
| C11orf98 |          | -4.16106 |          | -4.73401 | -4.58209 |
| CUL3     |          | -4.38649 |          | -4.38975 | -4.7468  |
| RPL37A   |          | -4.49149 |          | -4.30362 | -4.73411 |
| GNAI2    |          | -5.05678 |          | -3.81338 | -4.69627 |
| MECR     |          | -4.9728  |          | -3.75859 | -4.87063 |
| OXCT1    |          | -4.63161 |          | -4.13724 | -4.86413 |
| SEC61A1  |          | -4.66178 |          | -4.28688 | -4.71282 |
| SEC61A2  |          | -4.72953 |          | -4.28688 | -4.76385 |
| CAP1     |          | -5.38433 |          | -5.23839 | -3.20845 |
| UGDH     |          | -5.01554 |          | -3.7477  | -5.08656 |
| SDAD1    |          | -4.25271 |          | -5.14734 | -4.45345 |
| PTBP2    |          |          |          | -7.02535 | -6.8366  |
| IDH2     |          | -4.95027 |          | -4.18505 | -4.72868 |
| TOMM22   | -2.28308 | -4.30146 | -2.08185 |          | -5.20308 |
| ATXN2    |          | -4.52649 |          | -4.69733 | -4.66636 |
| EIF4B    |          | -4.7178  |          | -4.38881 | -4.78759 |
| PNPT1    |          | -5.0439  |          | -4.17426 | -4.70661 |



|          |          |          |          |          |          |
|----------|----------|----------|----------|----------|----------|
| CHMP1A   |          | -4.42856 |          | -4.70928 | -4.82755 |
| SNRPD2   |          | -4.05667 |          | -5.22175 | -4.72206 |
| MMS19    |          | -4.49643 |          | -4.49933 | -5.03348 |
| CDC42    |          | -4.92876 |          | -4.28839 | -4.86137 |
| HARS2    |          | -5.03531 |          | -4.04506 | -5.09817 |
| MRPL12   | -2.04634 | -5.88883 | -1.18183 | -5.06965 |          |
| CLPTM1   |          | -4.89544 |          | -4.36164 | -4.96857 |
| WARS     |          | -4.75253 |          | -4.6263  | -4.86475 |
| ARFIP2   |          | -5.10755 |          | -4.2102  | -4.95206 |
| RPA2     |          | -4.81456 |          | -4.22974 | -5.32955 |
| CHMP2B   |          | -5.13502 | -2.03458 | -3.13415 | -4.08104 |
| NDUFB11  |          | -5.20045 |          | -4.18187 | -5.01165 |
| EPHA1    | -6.26831 |          |          | -4.0743  | -4.06859 |
| DPM3     |          | -5.25123 |          | -4.27561 | -4.89013 |
| SLC35A4  |          | -5.3384  |          | -4.1907  | -5.00722 |
| RPL37AP8 |          | -5.22795 |          | -4.16979 | -5.14358 |
| FTH1     |          | -5.22908 |          | -4.45327 | -4.86123 |
| RDX      |          | -4.14441 | -1.64209 | -4.38709 | -4.40888 |
| PICALM   |          | -5.05316 |          | -4.56811 | -4.96402 |
| ARPC3    |          | -5.09544 |          | -4.36831 | -5.15753 |
| DDX3Y    |          | -5.08661 |          | -4.54167 | -4.99445 |
| HCFC2    |          | -5.26044 |          | -4.33127 | -5.08168 |
| PTGES3   |          | -5.30283 |          | -4.39515 | -5.07585 |
| REEP5    |          | -5.83261 |          | -5.19482 | -3.75053 |
| RBM34    | -3.8921  | -3.50372 | -2.50876 | -2.1255  | -2.74909 |
| MATR3    |          | -5.32108 |          | -4.42417 | -5.07043 |
| UBE2C    |          | -5.14944 |          | -4.42236 | -5.25073 |
| PSMB7    |          | -4.96915 |          | -4.41089 | -5.45651 |
| HNRNPM   |          | -4.70853 | -2.98092 | -3.54394 | -3.60499 |
| BCLAF1   |          | -4.0649  | -2.94167 | -3.36038 | -4.48002 |
| UFM1     |          | -5.19118 |          | -4.40005 | -5.2638  |
| NEMF     |          | -5.28942 |          | -4.66339 | -4.98257 |
| IQGAP3   |          | -5.52992 |          | -4.20857 | -5.21442 |
| RPL13    |          | -5.27446 |          | -4.83607 | -4.87123 |
| DPYSL5   |          | -5.27055 |          | -4.44352 | -5.27812 |
| TARS     |          | -5.45412 |          | -4.40651 | -5.16896 |
| HGH1     |          | -5.43261 |          | -4.53145 | -5.07159 |
| M6PR     | -6.04555 |          | -3.98995 | -5.0373  |          |
| GNB3     |          | -5.3995  |          | -4.58742 | -5.11406 |
| GNB4     |          | -5.3995  |          | -4.58742 | -5.11406 |
| RAD23A   |          | -5.33987 |          | -4.46506 | -5.29901 |
| 40057    |          | -5.46499 |          | -4.50708 | -5.14838 |
| IMPDH1   |          | -5.45426 |          | -4.47254 | -5.21175 |
| EXOSC4   |          | -5.42979 |          | -4.48563 | -5.23036 |
| ATP1A1   | -2.524   | -5.66697 | -1.60389 |          | -5.41985 |

|            |          |          |          |          |          |
|------------|----------|----------|----------|----------|----------|
| CAPZA2     |          | -5.48623 |          | -4.60675 | -5.21904 |
| MRPS5      |          | -5.56579 |          | -4.61271 | -5.15872 |
| UBL5       |          | -5.33386 |          | -4.69828 | -5.3341  |
| NPM1       |          | -5.08287 | -2.22782 | -3.04395 | -5.05716 |
| ACTR3B     |          | -5.7271  |          | -4.39891 | -5.32881 |
| COMT       |          | -5.71595 |          | -4.57047 | -5.18447 |
| HDGFRP2    | -5.26517 | -5.70614 |          | -4.50539 |          |
| SNRNP70    |          | -5.57603 |          | -4.68392 | -5.22716 |
| CKMT1A     | -2.3101  | -5.85969 | -1.84    |          | -5.50847 |
| CKMT1B     | -2.3101  | -5.85969 | -1.84    |          | -5.50847 |
| ADRM1      |          | -5.44569 |          | -4.69544 | -5.391   |
| RBBP4      |          | -5.48494 |          | -4.79432 | -5.27444 |
| RBBP7      |          | -5.48494 |          | -4.79432 | -5.27444 |
| CKMT2      | -2.3101  | -5.85969 | -1.89499 |          | -5.50847 |
| SACM1L     |          | -5.55736 |          | -4.73477 | -5.32369 |
| DENR       |          | -5.63939 |          | -5.10305 | -4.89386 |
| RPL30      |          | -5.54595 |          | -4.76832 | -5.32568 |
| MRPL43     |          | -5.66423 |          | -4.75568 | -5.23463 |
| SNRPA      |          | -5.56998 |          | -4.84685 | -5.24271 |
| DDX46      |          | -5.62514 |          | -4.77444 | -5.27114 |
| SP100      |          | -5.49745 |          | -4.88202 | -5.29697 |
| YTHDF1     |          | -5.5768  |          | -4.77046 | -5.37453 |
| NUDT4      |          | -5.64325 |          | -4.72062 | -5.37497 |
| CS         | -2.24014 | -5.52664 |          | -4.70282 | -3.32916 |
| SPTLC1     |          | -5.56894 |          | -4.85376 | -5.38499 |
| NEFM       | -2.87052 | -3.50362 |          | -4.50024 | -4.94739 |
| STAU2      |          | -5.60862 |          | -4.83702 | -5.37716 |
| ARF5       |          | -5.65143 |          | -4.79241 | -5.38654 |
| PSMA1      |          | -5.546   |          | -4.84956 | -5.43485 |
| C14orf166  |          | -5.6902  |          | -4.79525 | -5.35687 |
| TRAP1      |          | -5.62501 |          | -4.88721 | -5.33105 |
| USP47      |          | -5.63435 |          | -4.90651 | -5.32244 |
| EIF4A3     |          | -5.60138 |          | -4.8479  | -5.51706 |
| ME3        |          | -5.64892 |          | -4.92704 | -5.39613 |
| RPS3       |          | -5.70902 |          | -4.85466 | -5.43766 |
| SNRPF      |          | -5.73926 |          | -5.14189 | -5.33137 |
| OPA1       |          | -5.7994  |          | -5.16309 | -5.28601 |
| TCEA2      |          | -5.79077 |          | -5.05073 | -5.49063 |
| PRPF40A    | -1.68373 | -5.18964 |          | -4.61975 | -5.10291 |
| CD63       | -3.44268 | -3.69317 | -3.23669 | -2.8397  | -3.47028 |
| SF1        |          | -5.22209 | -2.19975 | -4.36768 | -5.07027 |
| NOMO1      |          | -5.51891 | -1.09195 | -5.13443 | -5.27709 |
| PRRC2C     | -1.56179 |          |          | -7.61845 | -8.41453 |
| PHB2       | -1.86453 | -5.74685 |          | -4.81701 | -5.25121 |
| UQCRCFS1P1 |          | -5.66671 | -2.21142 | -4.53859 | -5.26609 |

|               |          |          |          |          |          |
|---------------|----------|----------|----------|----------|----------|
| DBN1          | -1.28424 | -5.11847 | -2.24577 | -4.05272 | -5.01118 |
| RUFY1         |          | -4.60552 | -1.68794 | -4.88068 | -6.5686  |
| RUFY3         |          | -4.60552 | -1.68794 | -4.88068 | -6.5686  |
| PLRG1         |          | -5.75876 | -1.86596 | -4.91366 | -5.24453 |
| JAGN1         | -1.59523 | -5.78354 |          | -4.99844 | -5.42537 |
| ATPIF1        | -2.46938 | -5.39197 |          | -4.93296 | -5.06111 |
| TSC2          |          | -4.64575 | -3.29363 | -4.72018 | -5.23535 |
| DKFZp434B2017 |          | -4.30769 | -5.75457 | -3.1988  | -4.73889 |
| EIF3H         | -1.49807 | -5.56097 | -5.60409 |          | -5.36799 |
| PNN           | -2.17213 | -5.66261 |          | -4.92362 | -5.37639 |
| GLS           | -3.29643 | -2.92437 | -3.29424 | -4.94899 | -3.70304 |
| IMMT          | -1.36714 | -5.81508 | -1.31111 | -5.04069 | -5.14899 |
| YY2           | -2.58352 | -5.71604 |          | -4.96666 | -5.42228 |
| NME1          |          | -5.17076 | -5.52859 | -3.06628 | -5.12523 |
| YY1           | -2.96481 | -5.7204  |          | -5.05237 | -5.42446 |
| CNNM3         |          | -5.70257 | -3.45691 | -4.35879 | -5.87534 |
| SETBP1        | -4.63812 | -4.44592 | -2.86359 | -2.62184 | -5.06662 |
| ERH           | -1.20376 | -5.72022 | -3.42412 | -4.36445 | -5.29725 |
| EBP           |          | -9.37221 |          | -8.51453 | -2.17    |
| TLE4          |          |          | -6.4333  | -6.94597 | -7.27674 |
| SMARCE1       |          | -4.75258 | -4.76505 | -5.00203 | -6.13952 |
| SLC25A24      | -9.53643 | -5.10331 |          | -4.55124 | -2.16841 |
| NDUFS6        | -2.35716 | -6.13723 | -2.40031 | -6.16306 | -4.64045 |
| TJP1          | -9.28902 | -1.67118 | -1.93635 | -5.88508 | -4.65555 |
| NUMA1         |          | -6.06183 | -3.38665 | -6.61923 | -7.56077 |
| CBX1          | -9.43251 | -4.51135 | -3.71741 | -3.66025 | -2.40244 |
| THOC5         | -4.52908 | -4.64561 | -5.09969 | -4.86277 | -4.91247 |
