# Supplementary material for: GPR19 Coordinates Multiple Molecular Aspects of Stress Responses Associated with the Aging Process
Source: MDPI journal article supplement (doi:10.3390/ijms24108499), 2023-05-09
Supplement: s1 [file s1]

## **Data Supplement**

### **GPR19 coordinates multiple molecular aspects of stress responses associated with the aging process**

Stuart Maudsley<sup>1\*</sup>, Claudia Schrauwen<sup>1</sup>, İrem Harputluoğlu<sup>1</sup>, Deborah Walter<sup>1</sup>, Hanne Leysen<sup>1</sup>, Patricia McDonald<sup>2</sup>

1. Receptor Biology Lab, Department of Biomedical Science, University of Antwerp.
2. H. Lee Moffitt Cancer Center, Tampa, FL, USA

\* Corresponding Author: Prof. Stuart Maudsley – [stuartmaudsley@uantwerpen.be](mailto:stuartmaudsley@uantwerpen.be):  
[receptorbiologylab@gmail.com](mailto:receptorbiologylab@gmail.com)

**Table S4. Mean GPR19 induced protein expression alterations all compartment extracts.** Significantly-regulated proteins (identified by official Gene Symbols) found in cells, differential between mock-transfection and the specific GPR19 expression level (0.5, 1, 2, 5, 10µg), are represented as a log2-transformed and normalized expression ratio between the specific GPR19 expression level and the expression level found in cells receiving empty vector transfection.

| Gene Symbol | 0.5      | 1        | 2        | 5        | 10       |
|-------------|----------|----------|----------|----------|----------|
| FBXO41      | 10.69676 | 9.083785 | 10.7104  | 9.093955 | 9.55885  |
| PABPC4      | 7.79277  | 7.089818 | 7.918565 | 6.834981 | 7.504267 |
| RAD50       | 8.396166 | 7.69871  | 7.083238 | 6.343929 | 7.324503 |
| TUBB4A      | 8.61452  | 3.305781 | 7.270007 | 3.921923 | 9.986918 |
| PDHA1       | 6.800228 | 6.745516 | 7.592351 |          | 7.789457 |
| HDAC2       | 6.980002 | 4.572511 | 7.062519 | 4.546455 | 5.417666 |
| DIABLO      | 5.956536 | 6.117558 | 6.896559 | 6.473151 | 2.576088 |
| GNL3        | 6.41779  | 6.547671 | 5.554245 | 7.044593 | 2.428604 |
| TACC3       | 5.255857 | 5.646168 | 5.230488 | 6.347601 | 4.998936 |
| PGM3        | 5.856697 | 5.963834 | 5.085445 | 5.101395 | 5.409277 |
| GATC        | 4.763431 | 5.843191 | 5.230535 | 5.95175  | 5.139965 |
| HMGA2       | 6.025469 | 6.291443 | 3.564368 | 4.1637   | 6.806156 |
| MTHFD1L     | 5.03443  | 5.13742  | 5.644408 | 5.359593 | 5.318951 |
| PDAP1       | 9.222202 | 8.955604 |          | 3.87075  | 4.442603 |
| G3BP2       | 6.444117 | 2.507962 | 6.417986 | 5.351643 | 5.620753 |
| CKS1B       | 5.350146 | 4.71393  | 5.694834 | 4.757231 | 5.632189 |
| LYZ         | 4.050207 | 7.279965 | 2.903863 | 8.270085 | 3.640887 |
| HIST1H3A    | 6.705344 | 5.554681 | 5.815956 | 2.535865 | 5.469338 |
| PCK2        | 6.563432 | 4.35029  | 4.916279 | 3.959524 | 5.521555 |
| PRKACA      | 6.351085 | 2.344109 | 5.787345 | 5.140983 | 5.545881 |
| ALDH7A1     | 5.939367 | 4.592883 | 5.574678 | 3.816389 | 5.122418 |
| MDC1        | 5.577719 | 5.234245 | 4.315547 | 4.739501 | 4.836119 |
| MAT2B       | 4.3955   | 5.011012 | 5.450945 | 4.575029 | 5.189891 |
| ATP2A3      |          | 6.154594 | 6.655536 | 5.347379 | 6.317634 |
| CCDC47      | 6.64904  | 5.46689  | 2.513803 | 3.958372 | 4.654893 |
| TRAP1       | 9.638381 |          | 9.579779 | 3.96138  |          |
| PLS1        | 5.729315 | 3.552736 | 5.694644 | 3.81653  | 4.259494 |
| DNAJB1      | 4.243082 | 4.455654 | 4.976607 | 5.043156 | 4.251115 |
| TMCO1       | 3.686299 | 3.68318  | 3.757187 | 5.152776 | 6.363362 |
| LIMA1       | 3.630153 | 5.926437 | 4.433989 | 4.187908 | 4.322675 |
| MCM3        | 5.15333  | 5.730416 | 4.740339 | 4.30103  | 2.251686 |
| EIF5        | 4.252595 | 4.66208  | 4.334015 | 4.067817 | 4.837141 |
| CHCHD2      | 6.249968 | 3.22541  | 5.912626 | 2.499023 | 4.102614 |
| CHCHD2P9    | 6.249968 | 3.22541  | 5.912626 | 2.499023 | 4.102614 |
| NUP210      | 5.34126  | 4.045645 | 5.126187 | 2.866908 | 4.500165 |
| ETFA        | 4.40973  | 5.670759 | 3.73405  | 4.027265 | 4.028338 |
| TUBA1A      | 4.663854 | 5.565738 | 4.189228 | 3.59049  | 3.775831 |
| COLGALT1    | 4.255547 | 4.442226 | 4.261642 | 4.248381 | 4.5388   |

|          |          |          |          |          |          |
|----------|----------|----------|----------|----------|----------|
| UBA2     | 7.754652 |          | 6.813613 | 7.129645 |          |
| FH       | 5.41596  | 3.047286 | 5.364222 | 3.710613 | 4.096651 |
| RALA     | 2.673472 | 5.385117 | 3.319995 | 4.480454 | 5.551128 |
| RPS24    | 5.218748 | 5.433923 |          | 5.209906 | 5.444566 |
| FARSB    | 4.224168 | 4.234982 | 4.570312 | 3.002996 | 4.990068 |
| M6PR     | 4.640428 | 3.09044  | 4.399486 | 4.200679 | 4.571461 |
| CLPB     | 4.117615 | 4.983297 | 3.966944 | 3.667042 | 4.131427 |
| THOC3    | 4.848999 | 3.51066  | 4.882007 | 3.359276 | 4.258321 |
| CBR1     | 4.910196 | 4.824799 | 3.654328 | 3.62262  | 3.660259 |
| GDI2     | 4.133909 | 5.174894 | 3.27964  | 2.9253   | 5.060906 |
| SRPK1    | 3.509229 | 4.74124  | 3.938798 | 4.00468  | 4.173394 |
| DNMT1    | 1.964771 | 5.353118 | 2.593665 | 5.631031 | 4.80777  |
| PPAN     | 4.893352 | 3.032209 | 5.148684 | 4.845688 | 2.406189 |
| ERLIN1   | 4.741597 | 3.575653 | 4.040991 | 4.015641 | 3.899485 |
| DDX19A   | 5.441245 | 6.157138 | 1.952081 |          | 6.622569 |
| HIST1H1B | 5.153372 |          | 4.245155 | 6.479236 | 4.268037 |
| RTN3     | 2.830226 | 4.197738 | 3.638109 | 4.835835 | 4.50803  |
| SSBP1    | 4.081832 | 4.549111 | 4.397995 | 4.679666 | 2.25948  |
| CBR3     | 4.652119 | 4.7428   | 3.038877 | 3.437425 | 3.440067 |
| CHD5     | 3.454825 | 2.599169 | 3.845628 | 4.005116 | 5.226618 |
| TALDO1   | 3.693871 | 3.549166 | 4.304534 | 2.850333 | 4.534236 |
| ETF1     | 4.890324 | 4.824556 | 5.130607 | 4.003568 |          |
| RIF1     | 8.395669 | 3.016445 |          | 7.335939 |          |
| ANXA6    | 3.739491 | 4.35529  | 3.968379 | 3.240796 | 3.430652 |
| DTYMK    |          | 4.721363 | 4.302695 | 4.702006 | 4.868732 |
| CCDC6    | 4.36654  | 2.398018 |          | 3.744082 | 8.004424 |
| COPS4    | 3.806237 | 4.614148 | 2.396573 | 2.947247 | 4.438288 |
| FHOD1    | 3.254352 | 3.08163  | 3.575376 | 3.525703 | 4.761413 |
| RBM12    | 3.282013 | 3.917967 | 3.733188 | 3.135187 | 4.114262 |
| NAA10    | 4.573187 | 5.639501 |          | 3.14981  | 4.746903 |
| GRB2     | 4.527323 | 4.485842 | 4.436292 |          | 4.659344 |
| RPN2     | 3.522472 |          | 4.303988 | 6.208293 | 3.972253 |
| PPM1G    | 3.614445 | 3.266735 | 2.987266 | 3.633269 | 4.47674  |
| KIAA1524 | 2.59011  | 4.156684 | 3.005384 | 4.310237 | 3.836749 |
| GRWD1    | 3.411892 | 3.875944 | 3.603543 | 3.388359 | 3.596786 |
| HNRNPUL1 | 3.309534 | 3.296412 | 4.089483 | 3.557651 | 3.60201  |
| TMED10   |          | 5.20399  | 5.339811 | 2.053773 | 5.199549 |
| CDKN2B   | 2.039445 | 3.393592 | 5.046009 | 3.520885 | 3.688438 |
| BASP1    | 3.070783 | 4.488964 | 2.960233 | 2.693557 | 4.387876 |
| RPLP2    | 4.250819 | 3.084179 | 3.485987 | 3.446997 | 3.241341 |
| CIAPIN1  | 4.272707 | 3.534425 | 2.490515 | 3.02188  | 4.186033 |
| DCTN1    | 8.396502 |          | 2.100582 | 3.739887 | 3.223941 |
| TPI1     | 4.536716 | 3.228897 | 3.653853 | 2.26586  | 3.692306 |
| APEX1    | 2.423478 | 3.811718 | 2.763255 | 3.836632 | 4.454563 |
| SRI      | 3.159661 | 3.461419 | 3.887171 | 3.301778 | 3.45776  |
| HMGB1P1  | 2.663372 | 4.085604 | 2.788801 | 3.244377 | 4.444233 |

|               |          |          |          |          |          |
|---------------|----------|----------|----------|----------|----------|
| COX7C         | 4.305266 | 3.275132 | 3.706722 | 2.56665  | 3.152461 |
| NANS          | 3.985236 | 4.016078 | 3.777602 | 1.69122  | 3.484526 |
| PIN4          | 3.67267  | 3.855606 | 2.676915 | 2.657228 | 4.092039 |
| CLGN          |          | 7.256758 | -4.61398 | 6.912912 | 7.304615 |
| MT-CO2        | 5.108253 | -2.77347 | 5.634829 | 3.571318 | 5.229374 |
| EPB41L2       | 1.943074 | 3.25986  | 4.665453 | 3.22015  | 3.361896 |
| ILKAP         | 4.13834  | 2.557866 | 4.19354  | 2.454376 | 3.08642  |
| CDKN2A        | 2.039445 | 3.172306 | 4.669283 | 3.131024 | 3.415068 |
| ANP32C        | 2.171014 | 5.602177 | 2.783149 | 2.810144 | 3.047979 |
| GSTP1         | 3.802009 | 3.149388 | 3.483972 | 2.692793 | 3.048374 |
| GMPS          | 3.904269 | 4.159791 | 3.007207 | 2.588598 | 2.444054 |
| RBBP7         | 2.597623 | 4.844398 | 2.437794 | 3.513227 | 2.590523 |
| SFXN1         | 3.357896 | 3.876133 | 2.544774 | 2.179812 | 3.869542 |
| POLR2L        | 4.858581 | 2.500192 | 3.128831 | 2.422085 | 2.892313 |
| SRCAP         | 2.436201 | 3.916234 | 2.518214 | 3.549004 | 3.249127 |
| CAND1         | 3.160578 | 3.135602 | 6.565578 | 2.742497 |          |
| ANXA2         | 2.308101 | 3.659746 | 2.700853 | 2.887266 | 3.966553 |
| LSM14A        | 8.398797 |          | 1.642354 | 3.232209 | 2.166069 |
| RRP9          | 3.0736   | 2.589998 | 3.621747 | 2.618888 | 3.381173 |
| NUCKS1        | 2.016247 | 4.290982 | 2.29826  | 2.650762 | 3.97859  |
| RPS16         | 3.218792 | 3.35739  | 1.813713 | 3.196021 | 3.648465 |
| CDV3          | 4.673244 | 3.639074 | 4.588095 |          | 2.297464 |
| LTA4H         | 2.815766 | 2.892392 | 3.123152 | 2.605819 | 3.758297 |
| ACAA2         |          | 2.724134 | 4.166083 | 3.749408 | 4.55429  |
| SNRPD1        | 2.776892 | 3.352057 | 2.792276 | 2.74869  | 3.319625 |
| MAGOHB        | 1.987006 | 2.927922 | 3.102642 | 4.616539 | 2.323051 |
| STRBP         | 3.411098 | 3.678277 | 3.605837 | 4.243541 |          |
| U2AF1L4       | 2.651158 | 3.085298 | 3.128173 | 2.599909 | 3.442912 |
| TERF2         | 1.623507 | 4.378224 | 2.412714 | 3.111162 | 3.357781 |
| DENR          | 2.589578 | 3.110343 | 3.158672 | 2.206059 | 3.798974 |
| PDCD5         | 2.711168 | 3.370536 | 2.413948 | 2.796229 | 3.505163 |
| NHP2          | 2.533864 | 2.560516 | 2.520298 | 3.648656 | 3.400519 |
| NOP10         | 2.060649 | 4.05616  | 1.938515 | 3.142824 | 3.405095 |
| PSMA3         | 2.017553 | 4.06889  | 3.505596 | 3.14588  | 1.821469 |
| KCTD12        | 1.901425 | 3.771931 | 2.719482 | 2.728295 | 3.420602 |
| DKFZp313C1541 | 3.159809 | 3.905038 | 3.35076  | 3.962476 |          |
| RAB2B         | 3.159809 | 3.905038 | 3.35076  | 3.962476 |          |
| TOMM20        | 2.550239 | 3.245288 | 2.597236 | 2.452746 | 3.519299 |
| SLC25A13      | 3.23801  | 3.382695 | 2.205765 | 2.339206 | 3.181024 |
| SSU72         | 3.557537 | 3.097957 | 2.600004 | 2.923984 | 2.12216  |
| KRI1          | 4.524278 | 3.83669  |          | 2.507333 | 3.299088 |
| HN1           | 3.702839 | 3.502694 | 3.077645 |          | 3.847221 |
| CSDE1         | 4.636607 | 3.033983 | 3.770317 |          | 2.688017 |
| IQGAP1        | 2.123156 | 3.953605 | 2.301094 | 5.605098 |          |
| RANBP3        | 3.265385 | 3.449178 | 2.209416 | 1.777415 | 3.281335 |
| CHORDC1       | 3.321023 | 3.302629 | 2.795494 | 2.221963 | 2.316037 |

|           |          |          |          |          |          |
|-----------|----------|----------|----------|----------|----------|
| ATIC      | 2.630077 | 2.766063 | 3.388891 | 2.269906 | 2.89886  |
| NSF       | 2.024865 | 4.62273  | 3.971449 |          | 3.331813 |
| TPT1      | 3.144038 | 3.478618 | 2.276382 | 2.254789 | 2.753835 |
| TMX1      | 2.451503 | 2.554154 | 2.822177 | 2.948004 | 3.108268 |
| THOC2     | 3.489708 | 3.496777 | 3.505909 | 3.342624 |          |
| RPL9      | 2.252475 | 4.258341 | 2.80875  |          | 4.503358 |
| PABPN1    | 3.075848 |          | 3.005544 | 3.910261 | 3.798488 |
| CALM1     | 2.243569 | 4.14236  | 2.37897  | 2.954063 | 2.069066 |
| PRPSAP2   | 3.077188 | 2.422165 | 2.700893 | 2.202787 | 3.381976 |
| PRDX4     | 2.627755 | 2.508921 | 2.252693 | 2.669105 | 3.692437 |
| C1D       |          | 3.28747  | 3.038958 | 3.840286 | 3.575711 |
| HIST2H2AC |          | 2.733706 | 2.083622 | 6.078214 | 2.783803 |
| HSDL1     | 3.56927  | 4.081143 | 3.603531 | 2.397403 |          |
| EEA1      | 2.85673  | 2.62576  | 2.973406 | 2.73763  | 2.421728 |
| EDF1      | 2.401201 | 3.337021 | 2.380935 | 2.264412 | 3.1695   |
| PRDX6     | 2.872932 | 4.016294 | 3.05323  |          | 3.566438 |
| KLF12     |          | 3.011002 | 2.833759 | 2.274424 | 5.329515 |
| KLF3      |          | 3.011002 | 2.833759 | 2.274424 | 5.329515 |
| KLF5      |          | 3.011002 | 2.833759 | 2.274424 | 5.329515 |
| KLF7      |          | 3.011002 | 2.833759 | 2.274424 | 5.329515 |
| MYNN      |          | 3.011002 | 2.833759 | 2.274424 | 5.329515 |
| ZKSCAN7   |          | 3.011002 | 2.833759 | 2.274424 | 5.329515 |
| ZSCAN16   |          | 3.011002 | 2.833759 | 2.274424 | 5.329515 |
| ZSCAN2    |          | 3.011002 | 2.833759 | 2.274424 | 5.329515 |
| NMT1      | 1.932869 | 4.575278 | 2.209692 | 1.927036 | 2.714857 |
| HADHB     | 4.171443 | 2.590638 | 4.564615 | 6.058642 | -4.07987 |
| AHSA1     | 4.264408 | 6.039251 | -2.17585 | 5.175856 |          |
| ABCF2     | 2.759438 | 2.598108 | 2.845067 | 2.699784 | 2.391323 |
| ZC3H14    |          | 3.79447  | 2.767172 | 3.39016  | 3.338645 |
| PLD3      | 3.286029 | 5.564812 | 3.587991 | 2.708124 | -1.90836 |
| BRD3      |          | 2.670045 | 4.038248 | 3.37489  | 3.008545 |
| BRD4      |          | 2.670045 | 4.038248 | 3.37489  | 3.008545 |
| PSMD7     | 1.545583 | 2.870938 |          | 5.040378 | 3.569159 |
| RPS10     | 1.36594  | 2.068691 | 2.635922 | 4.785406 | 2.155432 |
| ILF3      | 2.052741 | 3.563401 | 2.248815 | 2.551532 | 2.465893 |
| AP1B1     | 2.388375 |          | 3.026677 | 3.517103 | 3.935037 |
| TOP2B     | 4.057183 | 3.388927 | 2.647692 |          | 2.767654 |
| ATP2A2    | 5.130864 | 3.4916   |          |          | 4.231958 |
| ANP32A    | 2.807105 | 2.850172 | 2.17328  | 2.199548 | 2.798892 |
| EXOC3L4   | 2.37739  | 2.386889 | 3.484739 | 2.351166 | 2.213082 |
| PEBP1     | 3.273944 | 3.194521 | 2.476725 |          | 3.862371 |
| NAP1L4    | 4.52622  |          | 3.119953 | 5.121954 |          |
| MGEA5     | 2.911222 | 3.078775 | 1.826328 | 2.369549 | 2.559235 |
| USP34     | 1.735766 | 3.563102 | 3.163682 | 2.11946  | 2.142424 |
| STMN2     | 2.481092 | 3.505233 |          | 2.732641 | 3.946908 |
| NUP205    | 3.59716  | 3.948217 | 4.011751 | 3.431362 | -2.33282 |

|            |          |          |          |          |          |
|------------|----------|----------|----------|----------|----------|
| CDC37      | 3.770923 | 3.077037 | 2.712773 | 3.074254 |          |
| SUB1       | 2.300934 | 3.356013 | 3.479484 |          | 3.439905 |
| PGP        | 2.84083  | 2.91989  | 2.143372 | 1.975463 | 2.667839 |
| ADSL       | 2.517647 | 2.556399 | 2.701169 | 2.399824 | 2.316947 |
| HIST2H3PS2 |          | 3.990903 |          | 4.752464 | 3.734658 |
| RANBP1     | 4.90823  | 2.528558 |          | 1.937098 | 3.090749 |
| SRSF9      | 2.361875 |          | 2.755881 | 3.080814 | 4.263432 |
| CAD        | 2.682196 | 2.644532 | 2.893146 | 1.851236 | 2.342075 |
| COX15      | 3.338216 |          | 2.732697 | 2.510183 | 3.813923 |
| YWHAH      | 2.089552 | 3.636871 | 3.743545 | 2.875597 |          |
| HIST2H2AA3 |          | 2.733706 | 2.083622 | 4.715684 | 2.783803 |
| BAG6       | 3.386025 | 4.516488 | 3.491089 | 3.374618 | -2.4849  |
| UBE2A      | 2.149374 | 3.820374 | 3.532983 |          | 2.745289 |
| HPRT1      | 2.003431 | 3.622363 |          | 2.835459 | 3.756227 |
| DYNLRB1    | 2.232533 | 1.400357 | 2.021666 | 2.199424 | 4.359371 |
| PKN2       | 2.880802 |          | 3.065371 | 3.08492  | 3.176683 |
| AFG3L2     |          | 4.464799 |          | 3.487026 | 4.228582 |
| SMNDC1     | 8.398417 |          | 1.918355 | 1.851577 |          |
| TRIP13     |          | 2.699176 | 4.053877 | 2.308015 | 3.098892 |
| RBM4       | 2.161582 | 2.93607  | 2.63853  | 2.561265 | 1.856834 |
| NVL        | 4.385069 | 4.05471  | -4.97567 | 4.065401 | 4.613088 |
| GNB2L1     | 2.348412 | 2.589572 | 2.593452 | 2.824897 | 1.783433 |
| BLVRA      | 3.132613 | 3.233212 |          | 2.617496 | 3.08048  |
| NPEPPS     | 3.345038 | 3.752324 | 2.212608 | 2.704853 |          |
| PSMB1      | 3.184728 | 3.152704 | 2.929735 | 2.612459 |          |
| CHCHD4     |          | 3.589819 |          | 4.102385 | 4.160435 |
| SDHA       |          | 3.395392 | 3.77281  | 4.663784 |          |
| DDX42      | 1.614998 | 3.018263 | 2.059933 | 2.264568 | 2.871579 |
| DBNL       | 2.477241 | 2.689188 | 2.181023 | 1.799021 | 2.682106 |
| WDR6       | 2.815243 | 3.816346 | 2.16487  | 2.989692 |          |
| UBL4A      | 2.872313 |          | 2.711075 | 2.902186 | 3.283377 |
| MSH6       | 2.762846 | 2.957977 | 2.896963 |          | 3.017527 |
| TPD52      | 2.30848  |          |          | 4.505419 | 4.80179  |
| LDHA       | 2.273628 | 2.898453 | 2.46049  | 2.15447  | 1.798486 |
| CUL4B      | 3.154114 | 3.013078 |          | 2.628965 | 2.710734 |
| DDX51      |          |          |          | 6.285229 | 5.18558  |
| DUT        | 2.43142  | 3.879403 |          | 1.67067  | 3.485811 |
| AKR1B1     | 3.419202 | 3.869911 |          |          | 4.167174 |
| UCHL1      | 2.431931 | 4.250201 |          |          | 4.773927 |
| P4HB       | 1.518037 | 3.485762 | 1.167048 | 3.073572 | 2.195795 |
| FLNB       | 2.663663 | 2.754046 | 1.543499 | 1.975149 | 2.407077 |
| EIF4A1     | 2.112437 | 2.434614 | 2.537098 | 1.611386 | 2.6457   |
| NNT        | 4.259772 | 5.234429 | 4.391215 |          | -2.61283 |
| TMSB10     | 2.358047 | 3.15616  |          | 2.113698 | 3.636859 |
| ZYX        | 3.877549 |          |          | 3.453583 | 3.900944 |
| ZC3HC1     |          | 3.914305 |          | 3.584355 | 3.730338 |

|          |          |          |          |          |          |
|----------|----------|----------|----------|----------|----------|
| NUDC     | 2.978481 | 2.655575 | 3.02655  | 2.557965 |          |
| SKP1     | 2.783513 |          | 2.763657 | 3.245967 | 2.423788 |
| STARD13  | 2.630626 |          | 2.984814 | 3.636994 | 1.929293 |
| PRMT1    | 2.142419 | 2.22586  | 2.010731 | 2.329166 | 2.443066 |
| FKBP8    | 4.383028 | 3.488797 | 4.267455 | 2.382108 | -3.37283 |
| ATAD1    | 8.39645  |          |          | 2.62197  |          |
| SDF4     | 2.490026 |          | 2.78236  | 3.415768 | 2.317722 |
| NAE1     | 2.288575 | 2.383351 |          | 2.826385 | 3.505206 |
| LIMD1    |          | 3.663601 |          | 3.801876 | 3.513859 |
| NUDT5    | 1.554188 | 2.607565 | 1.868897 | 1.852188 | 3.08241  |
| CTPS2    | 5.507572 | 5.451168 |          |          |          |
| SPTLC1   | 2.486707 | 3.604172 | 2.520369 | 2.338684 |          |
| RAB6A    |          | 3.447894 |          | 2.750617 | 4.736682 |
| CANX     | 3.60814  |          | 3.494015 | 3.812525 |          |
| ACTBL2   | 2.89498  |          | 3.911076 | -2.47568 | 6.579158 |
| H2AFV    | 1.593994 | 2.451433 |          | 4.183837 | 2.678711 |
| DDX52    | 8.395844 |          |          |          | 2.502621 |
| PSMA8    | 2.054712 | 3.637178 | 3.052534 |          | 2.127227 |
| ILK      | 4.231647 |          |          | 3.172317 | 3.458382 |
| PSIP1    | 7.232805 | -3.50772 |          |          | 7.136455 |
| TDRKH    | 2.751986 |          | 2.527383 | 2.715188 | 2.820129 |
| POLR1C   | 3.126978 |          | 2.681277 | 2.644198 | 2.331464 |
| TPX2     | 2.934783 | 2.561411 |          | 2.611755 | 2.665921 |
| DSG1     |          | 5.979821 |          | 2.708999 | 2.045148 |
| GARS     | 3.973393 | -5.1418  | 3.990592 | 4.839776 | 3.031165 |
| RAB6B    |          | 3.447894 |          | 2.633126 | 4.602091 |
| H3F3C    | -2.75761 | 3.990903 |          | 5.689182 | 3.734658 |
| CRNKL1   | 3.096827 |          | 2.352975 | 3.093123 | 2.05168  |
| GPS1     |          | 7.063828 | 3.512519 |          |          |
| RBBP4    |          | 2.951659 | 2.043936 | 3.446305 | 2.121506 |
| ESD      | 2.936422 | 2.585656 |          | 2.271308 | 2.731271 |
| NCBP1    | 2.839423 |          | 2.479855 | 2.659017 | 2.522733 |
| MTHFD1   | 2.933236 | 3.364453 | 1.966768 | 2.130307 |          |
| DBI      | 2.585513 | 2.694352 |          | 2.099327 | 3.007038 |
| MRPL48   | 2.150361 | 3.124901 | 2.539726 | 2.550286 |          |
| MPHOSPH6 | 2.446221 |          | 2.333557 | 2.775983 | 2.753292 |
| ACTR2    | 2.33097  | 2.907762 | 3.106009 |          | 1.908381 |
| TSPYL1   |          | 4.12942  | 2.117655 |          | 4.002969 |
| TIMM13   |          |          | 2.693907 | 3.364056 | 4.161816 |
| NSF      |          | 4.198847 | -2.13943 | 4.490125 | 3.667606 |
| BCAS2    | 2.825456 |          | 3.756229 | 3.634624 |          |
| HACD3    |          |          | 2.746909 | 4.128474 | 3.335625 |
| PFDN2    | 2.941764 | 2.868864 |          | 2.044244 | 2.33969  |
| COX5A    | 2.419497 |          |          | 4.391836 | 3.343177 |
| PDIA3    | 1.999607 |          | 2.751754 | 2.838457 | 2.446141 |
| FAM96B   | 2.238979 |          | 2.466421 | 2.812071 | 2.501653 |

|         |          |          |          |          |          |
|---------|----------|----------|----------|----------|----------|
| ATF1    | 2.544336 | 2.539029 | 2.654205 |          | 2.245269 |
| CREB1   | 2.544336 | 2.539029 | 2.654205 |          | 2.245269 |
| CREM    | 2.544336 | 2.539029 | 2.654205 |          | 2.245269 |
| RGS10   | 2.78774  | 2.96248  | 2.127421 | 2.082464 |          |
| GLO1    | 2.543639 | 2.627275 |          | 1.79655  | 2.967073 |
| NSFL1C  |          | 2.931847 | 2.492627 | 1.815971 | 2.67758  |
| HSPB1   | 8.395398 |          | 2.782095 | 2.552177 | -3.8192  |
| ALCAM   | 1.761659 | 3.420197 | 2.247822 |          | 2.417631 |
| MTA1    | 1.622628 | 1.155342 |          | 1.597278 | 5.446669 |
| STRAP   | 2.467938 | 2.649202 | 2.640798 | 2.001073 |          |
| GLYR1   | 4.547577 |          | 3.314392 |          | 1.889903 |
| NIP7    | 2.100753 | 4.442407 | -2.22542 | 2.195083 | 3.189934 |
| EIF1    | 2.369642 | 2.636721 | 2.48903  |          | 2.201114 |
| RRM1    | 2.327804 | 1.518488 | 1.545126 | 2.177119 | 2.123231 |
| ATP1A2  |          |          | 2.322769 | 4.28073  | 3.06016  |
| PPP2R1B |          | 2.709558 | 1.616749 | 2.719097 | 2.602009 |
| PFKP    | 3.171084 | 3.09114  |          |          | 3.290698 |
| GBAS    | 2.041613 |          | 2.237197 | 2.837679 | 2.401106 |
| GART    | 3.024337 |          | 2.43422  | 2.121082 | 1.915489 |
| RPL38   | 2.328322 | 2.800782 | 1.950077 |          | 2.415705 |
| DYNLL1  | 2.417682 | 3.007906 | 2.003058 |          | 2.007872 |
| ANXA5   | 3.476821 |          | 1.864747 |          | 4.081206 |
| TRMT6   | 2.405282 | 2.789246 |          | 1.889109 | 2.337332 |
| GSTO1   | 3.12412  | 3.250886 | -2.72243 | 2.190064 | 3.541855 |
| PSMC2   | 1.933995 | 1.355187 | 2.211635 | 1.554068 | 2.315774 |
| PPP4R2  |          |          | 2.905439 | 2.930947 | 3.485517 |
| AKR7A2  |          | 4.006895 | 2.149501 | 3.14305  |          |
| PPIF    |          | 2.83708  | 2.381816 | 4.037908 |          |
| PTBP3   | 2.255026 |          | 2.193605 | 2.727708 | 2.072868 |
| PABPC1  | 3.376748 | 3.159149 | 2.579701 | 2.9656   | -2.85646 |
| NUP50   | 3.44336  | 2.277269 |          |          | 3.482992 |
| HINT1   | 2.84078  |          | 1.408848 | 2.270888 | 2.674395 |
| ALDH1B1 | 2.727469 |          |          | 3.086537 | 3.368817 |
| DPY30   |          | 2.9679   |          | 3.061497 | 3.137028 |
| SART3   | 2.044567 | 2.726008 | 2.262118 | 2.105084 |          |
| MAP1S   | 2.48879  | 2.618711 | 1.972609 |          | 2.046283 |
| VRK1    | 2.106812 |          | 2.177151 | 2.355274 | 2.442467 |
| PSMA5   | 1.957143 |          |          | 4.056486 | 3.056311 |
| HBS1L   |          | 2.322189 | 1.60252  | 2.116446 | 3.003525 |
| HN1L    | 2.666766 | 2.430175 |          | 1.88859  | 2.036972 |
| RBM26   | 2.15901  | -2.75517 | 3.001943 | 3.444488 | 3.144235 |
| CALM2   |          | 4.14236  | 2.515178 | 2.228614 |          |
| KDM1A   | 4.40447  |          | 4.438439 |          |          |
| CSTB    | 2.761996 |          | 2.598097 | 1.623387 | 1.839498 |
| TIMM10B | 2.58872  |          | 3.096328 | 3.107261 |          |
| RPL22   | 2.860579 |          | 2.581148 |          | 3.348452 |



|           |          |          |          |          |          |
|-----------|----------|----------|----------|----------|----------|
| RAB11FIP1 |          | 2.641627 | 3.469086 | 2.678778 |          |
| SMC4      | 2.875315 |          | 2.669424 | 1.960001 | 1.252565 |
| NRAS      | 2.910918 |          |          | 2.962181 | 2.870967 |
| ANAPC7    | 2.82991  |          | 2.982728 |          | 2.908205 |
| TFG       | 2.565857 | 3.504833 | 2.649044 |          |          |
| CA2       | 2.870022 |          | 2.295799 | 1.833711 | 1.718721 |
| HYOU1     |          |          | 2.750564 | 2.841358 | 3.115781 |
| ARL3      | 2.062439 | 2.208102 |          | 1.794842 | 2.620009 |
| TMA16     | 2.495131 |          | 1.950916 | 2.109972 | 2.115403 |
| PSMC3     | 2.874807 | 3.243435 |          | 2.506897 |          |
| CTNNB1    |          | 5.219114 | 3.403984 |          |          |
| RAB10     | 1.929802 | 2.904431 |          | 1.841796 | 1.939974 |
| IWS1      | 2.580707 | 2.559899 |          |          | 3.364823 |
| PYCR1     | 2.341481 | 3.473145 |          |          | 2.662687 |
| RAB5B     | 2.637897 |          | 3.020582 | 2.773151 |          |
| RPS15A    | 2.232466 | 2.609811 | 2.594986 | -2.02694 | 3.014615 |
| STX18     | 8.39644  |          |          |          |          |
| TOX4      | 8.395991 |          |          |          |          |
| FDFT1     | 8.395719 |          |          |          |          |
| RIC8A     | 8.395663 |          |          |          |          |
| PDE9A     | 8.395463 |          |          |          |          |
| FAM21D    | 8.395418 |          |          |          |          |
| RNF14     | 8.395376 |          |          |          |          |
| HRAS      | 2.554413 |          |          | 2.962181 | 2.870967 |
| PLS3      | 1.780727 | 2.573552 | 2.46333  | 1.569557 |          |
| MAEA      |          | 2.635836 |          | 2.503828 | 3.234395 |
| WDR3      | 4.357123 | 2.050935 |          |          | 1.931114 |
| SIN3A     | 3.961659 | 4.372344 |          |          |          |
| ADNP      | 2.088494 |          | 1.365711 | 3.057401 | 1.812595 |
| CPNE3     | 2.254952 | 2.291597 |          | 1.594939 | 2.172848 |
| ARHGDIA   | 1.802579 | 1.656896 | 2.485199 |          | 2.318728 |
| SAFB      | 2.388361 | -1.3745  | 2.178701 | 2.131884 | 2.907055 |
| TNPO1     | 2.641196 |          |          | 2.069971 | 3.500907 |
| MAT2A     | 1.858518 | 2.523125 |          | 1.753231 | 2.075498 |
| UBTF      |          | 2.775355 |          | 2.623433 | 2.803179 |
| SNX27     |          |          | 2.795569 | 2.711297 | 2.685207 |
| SMARCB1   | 1.645532 |          | 1.956902 | 2.015545 | 2.532361 |
| TNPO2     | 4.066277 |          |          |          | 4.047242 |
| POLR2B    | 2.680934 |          | 2.764865 |          | 2.64382  |
| RBM17     | 2.205135 | -2.2254  | 2.812746 | 2.703947 | 2.584915 |
| PSPC1     | 2.744088 |          | 2.898658 | 2.429015 |          |
| ACTA1     |          | 2.833885 | 2.58068  |          | 2.646226 |
| ACTA2     |          | 2.833885 | 2.58068  |          | 2.646226 |
| ACTC1     |          | 2.833885 | 2.58068  |          | 2.646226 |
| PFKL      | 3.055048 | 3.022286 |          | 1.980592 |          |
| RAB35     |          | 2.993561 |          | 2.345817 | 2.698869 |

|          |          |          |          |          |          |
|----------|----------|----------|----------|----------|----------|
| GNPNAT1  |          | 2.907586 |          | 2.61611  | 2.504529 |
| NDUFS3   |          | 3.634004 | 1.139498 |          | 3.24777  |
| PSMD1    | 2.787046 |          | 2.086426 | 3.123025 |          |
| PPP1R8   |          |          | 2.613168 | 2.660304 | 2.708897 |
| PDHX     |          |          | 1.674125 | 3.640508 | 2.664591 |
| PDE12    | 2.133018 | -2.56032 | 4.53943  | 3.85359  |          |
| STOML2   |          | 5.223988 |          | 2.711873 |          |
| DYNC1LI1 |          | 2.781648 | 2.636195 |          | 2.509732 |
| ZRANB2   |          | 3.343242 | 1.927306 | 2.635135 |          |
| GRHPR    |          | 3.392176 |          | 2.097906 | 2.341322 |
| NDUFS2   | 2.26182  | 3.080232 | 2.427733 |          |          |
| SART1    |          | 2.596741 |          | 2.52564  | 2.645641 |
| PHKA1    |          | 4.328953 |          |          | 3.425716 |
| CPSF6    | 1.998553 | 3.034406 | 2.714343 |          |          |
| ATP6V1A  | 2.616283 |          | 3.914687 |          | 1.201298 |
| DHCR7    | 2.814599 |          | 2.4997   | 2.402    |          |
| ABHD10   | 4.413496 |          | -1.69968 | 4.955009 |          |
| WBP11    |          |          | 2.564058 | 2.540589 | 2.535269 |
| ZNF740   | 3.652506 | 3.932609 |          |          |          |
| PAK1     |          | 3.583922 |          |          | 4.001088 |
| CUL4A    | 2.822311 | 2.557187 |          | 2.192953 |          |
| MRPL15   |          |          |          | 3.587739 | 3.977276 |
| MYL12A   |          | 2.558908 | 2.996801 |          | 2.007677 |
| MYL9     |          | 2.558908 | 2.996801 |          | 2.007677 |
| NACA     | 2.736439 | 3.312098 | 1.50349  |          |          |
| NACAP1   | 2.736439 | 3.312098 | 1.50349  |          |          |
| BLVRB    | 2.613873 | 2.691149 |          |          | 2.246742 |
| PCMT1    | 2.316211 |          |          | 3.081548 | 2.10608  |
| NAP1L1   | 2.17548  | 3.101041 |          |          | 2.195262 |
| STAG2    | 2.321941 |          | 2.577996 | 2.551638 |          |
| SCAF4    | 2.225364 | -2.49679 | 2.292259 | 2.153716 | 3.239632 |
| CDC27    |          |          |          | 3.722954 | 3.671455 |
| NDUFS5   |          | 4.017659 |          |          | 3.362489 |
| UQCRC2   | 2.26353  |          | 2.066224 | 3.029847 |          |
| STX12    |          |          | 1.953191 | 2.78968  | 2.590861 |
| WDR5     |          | 2.575757 | 2.991702 |          | 1.747565 |
| RAB2A    |          |          | 3.35076  | 3.962476 |          |
| BPTF     |          |          |          | 3.211157 | 4.071586 |
| TMEM201  | 2.151654 |          | 2.131159 |          | 2.998632 |
| C12orf43 |          | 3.361569 | 3.543783 | -2.78515 | 3.081793 |
| ACAT2    | 2.076233 |          |          | 1.947391 | 3.170913 |
| EIF4H    | 2.794319 | 2.41855  |          | 1.973526 |          |
| TRAX     | 2.109011 | 2.937282 |          | 2.136881 |          |
| EHD4     | 2.489073 | 2.69431  |          | 1.984306 |          |
| ATP5A1   |          | 4.529002 |          | 2.626821 |          |
| CCDC124  | 2.154575 |          | 2.730384 | 2.260632 |          |

|          |          |          |          |          |          |
|----------|----------|----------|----------|----------|----------|
| TP53BP1  |          |          | 4.113898 |          | 3.021948 |
| MTX1     | 2.394999 |          |          | 2.656181 | 2.045594 |
| RAB5A    |          |          |          | 4.87823  | 2.154035 |
| FHL1     | 3.325759 | 3.400726 | 3.884692 |          | -3.58849 |
| HMGNS    | 2.602247 |          |          | 2.295152 | 2.120885 |
| LMNA     | 2.9199   | 3.662488 | -5.72582 | 3.782661 | 2.318342 |
| SOD1     | 2.48908  | 2.681171 |          |          | 1.767386 |
| TPM4     | 2.154613 |          |          | 2.231268 | 2.526874 |
| SUPT5H   |          | 2.606333 |          | 2.052731 | 2.242365 |
| SERPINB6 | 1.701367 |          | 2.574172 | 2.623402 |          |
| OSBP     | 3.503244 | 3.39253  |          |          |          |
| CNPY2    | 1.692812 |          |          | 2.535902 | 2.658029 |
| KHSRP    | 2.337543 |          | 2.334367 | 2.18284  |          |
| TUBA4B   | 1.969895 |          | 2.757484 | 2.125315 |          |
| NOP58    | -1.21251 |          | 2.190343 | 3.757845 | 2.102168 |
| RGPD8    |          |          | 2.790729 | 1.993185 | 2.044556 |
| SMS      | 2.342579 | 2.89901  |          | 1.570894 |          |
| PDCD6IP  | 2.736209 | 2.827672 | 1.23835  |          |          |
| FAM192A  | 2.19678  |          | 2.101662 | 2.502472 |          |
| NIP30    | 2.19678  |          | 2.101662 | 2.502472 |          |
| PGRMC2   | 2.008998 | -2.21803 | 2.229268 | 2.424186 | 2.334954 |
| TECR     |          | 3.335086 |          | 3.398467 |          |
| PAFAH1B1 | 2.375067 | 2.310399 |          | 2.002867 |          |
| PSME3    | 1.675126 | 1.972155 | 3.035634 |          |          |
| RPS15A   |          |          |          |          | 6.675799 |
| CALM3    |          | 4.14236  | 2.515178 |          |          |
| UBE2D3   |          |          | 1.529338 | 2.567621 | 2.527655 |
| PPP1R12A |          | 3.297794 | 2.374605 | 2.699813 | -1.75707 |
| DOCK7    | 2.418229 |          |          | 1.939902 | 2.249794 |
| RCC1     | 1.954594 |          | 1.902196 | 2.737198 |          |
| ENOPH1   |          | 3.275681 |          | 3.281413 |          |
| ADH5     |          | 4.438559 |          |          | 2.107903 |
| CERS2    |          | 2.302802 |          | 4.221438 |          |
| BOLA2B   | 1.949802 |          | 2.531919 |          | 2.030146 |
| PRPF4B   |          |          | 2.03932  | 2.298579 | 2.169365 |
| PSMD2    | 2.575998 |          |          | 1.913183 | 1.991732 |
| HSPH1    | 1.861151 | 2.481301 |          | 2.136592 |          |
| SEH1L    |          |          | 3.148777 |          | 3.291323 |
| PSMC4    | 3.62412  |          | 2.79761  |          |          |
| MRPL54   | 1.979787 |          |          | 2.264255 | 2.176214 |
| IGHA1    |          |          |          | 6.412257 |          |
| IGHA2    |          |          |          | 6.412257 |          |
| ALG10    |          | 3.660608 |          |          | 2.749062 |
| NDUFS8   |          |          |          | 3.055673 | 3.338904 |
| MRPL4    |          |          |          | 6.368657 |          |
| UBXN1    |          | 3.527064 |          | 2.838908 |          |

|            |          |          |          |          |          |
|------------|----------|----------|----------|----------|----------|
| PSMA2      | 3.189391 | 3.625871 | 3.235108 | -3.68476 |          |
| CAP1       | 2.493121 | -3.17587 | 2.35188  | 2.716527 | 1.979327 |
| USP11      |          |          | 4.007856 |          | 2.338879 |
| USP4       |          |          | 4.007856 |          | 2.338879 |
| COX17      |          | 4.138176 |          | 2.176945 |          |
| PPP2R2A    | 2.009355 |          |          | 1.916157 | 2.386878 |
| NENF       |          | 4.063449 | 2.228286 |          |          |
| TFCP2      |          | 3.1238   | 3.154542 |          |          |
| UCK2       | 1.61479  | 1.611933 | 1.854843 |          | 1.19442  |
| GRPEL1     |          | 3.194287 |          | 3.074856 |          |
| RBMXL3     | 2.045071 |          | 1.924122 |          | 2.285528 |
| IMPDH2     | 2.106161 | 2.519863 | 1.882199 | -2.30186 | 2.026422 |
| RPS19      |          | 4.045033 | -2.30321 |          | 4.455749 |
| RPIA       | 2.937837 |          |          |          | 3.250943 |
| PIN1       | 2.208864 |          |          | 1.713509 | 2.240623 |
| ANP32B     | 2.161234 | 2.40423  |          | 1.576709 |          |
| IK         | 2.841029 | -2.64044 | 1.837014 | 1.870852 | 2.203195 |
| HIST2H2AA3 |          |          |          | 6.078214 |          |
| IKBKAP     |          | 2.322042 |          |          | 3.750714 |
| MRPS22     |          | 3.915969 |          | 2.155555 |          |
| GNL3L      | 1.872913 |          |          | 2.058355 | 2.092061 |
| HMG20B     |          |          |          | 3.038872 | 2.902378 |
| FERMT2     | 2.110109 | 2.277672 |          | 1.52274  |          |
| HIST1H2BB  |          |          |          | 3.775531 | 2.131237 |
| HIST1H2BJ  |          |          |          | 3.775531 | 2.131237 |
| HIST1H2BO  |          |          |          | 3.775531 | 2.131237 |
| HIST2H2BC  |          |          |          | 3.775531 | 2.131237 |
| HIST2H2BD  |          |          |          | 3.775531 | 2.131237 |
| HIST2H2BE  |          |          |          | 3.775531 | 2.131237 |
| HIST3H2BB  |          |          |          | 3.775531 | 2.131237 |
| RPL3L      | 2.500626 |          | 3.394207 |          |          |
| ATP6V1G1   | 1.704632 |          |          | 2.084276 | 2.070331 |
| SUPT6H     |          |          |          | 2.52148  | 3.310968 |
| HTATSF1    |          |          | 1.271637 | 3.434256 | 1.124999 |
| PHF10      |          | 3.305897 |          | 2.50985  |          |
| YWHAH      |          | 3.409867 | 2.333325 |          |          |
| TUBB       | 4.624252 |          | 1.116309 |          |          |
| NPEPPSL1   |          | 2.245471 | 1.864875 | 1.628121 |          |
| UBBP4      | 2.932834 |          | 2.78376  |          |          |
| CNOT1      |          | 2.811339 | -2.58404 | 2.725698 | 2.745248 |
| TMEM11     |          | 3.429974 |          | 2.215355 |          |
| CSTF1      |          |          |          | 2.978231 | 2.65747  |
| RRP8       | -1.70817 | 4.402776 |          |          | 2.926458 |
| SDF2L1     |          |          | 3.044193 | 2.573121 |          |
| USP5       | 2.758499 | 2.834105 |          |          |          |
| CIRH1A     |          | 2.703142 | 2.87378  |          |          |

|          |          |          |          |          |          |
|----------|----------|----------|----------|----------|----------|
| WARS2    | 1.617425 |          |          | 1.919252 | 2.003444 |
| C7orf50  |          |          |          | 2.674377 | 2.84751  |
| CPSF4    |          |          |          | 2.126074 | 3.356246 |
| MBD3     |          |          |          | 5.476899 |          |
| ALDOA    | 3.534905 |          | 1.90478  |          |          |
| NDUFAF3  | 1.924381 |          |          | 1.6416   | 1.872009 |
| ALDH3A2  |          |          | 2.556438 | 2.881385 |          |
| BID      |          |          |          | 3.21055  | 2.225922 |
| TXNDC17  | 2.625698 | 2.797193 |          |          |          |
| ACTG2    |          | 2.833885 | 2.58068  |          |          |
| EIF2S1   |          |          | 1.6592   | 1.781232 | 1.970866 |
| ARL6IP1  |          |          |          | 2.28348  | 3.061888 |
| RPP30    |          | 3.162947 |          | 2.175497 |          |
| MRPL28   | 2.89524  | 2.435261 |          |          |          |
| SRP72    |          | 2.419086 |          |          | 2.911212 |
| ATP2B1   | 2.2214   | 3.097474 |          |          |          |
| ATP2B2   | 2.2214   | 3.097474 |          |          |          |
| PSMD3    |          | 2.901293 |          | 2.399148 |          |
| EIF4G3   | 2.666532 |          | 2.630139 |          |          |
| TFAM     | 2.850899 |          |          | 2.391975 |          |
| HMGB1    |          |          | 2.053238 |          | 3.185158 |
| CIAO1    |          |          | 2.643759 | 2.580158 |          |
| AASDHPPT |          | 3.698679 |          | 1.525075 |          |
| ATP5J    |          | 2.302903 |          |          | 2.894686 |
| HSPA8    | 2.535244 | 2.767095 | 1.982832 | -2.10432 |          |
| MDH1     | 2.024572 |          |          |          | 3.123632 |
| HNRNPUL2 | 2.337714 |          |          | 2.810361 |          |
| DNAJC8   | 2.775094 |          |          |          | 2.360196 |
| IGF2R    |          | 5.019741 | 2.288653 | -2.18229 |          |
| MTAP     |          |          |          | 2.186789 | 2.92956  |
| TBCB     | 2.823318 | 2.290626 |          |          |          |
| H2AFZ    | -2.48235 | 2.451433 | -1.54095 | 3.994732 | 2.678711 |
| AK1      | 2.498222 | 2.590154 |          |          |          |
| PITRM1   |          | 4.302467 | -5.89462 | 3.160042 | 3.518041 |
| RPS27L   |          | 3.586871 |          | -1.85918 | 3.352327 |
| TPM1     | 2.048929 | 3.011784 |          |          |          |
| WAC      |          | 3.087276 |          |          | 1.966984 |
| DISC1    | 2.109011 | 2.937282 |          |          |          |
| TSNAX    | 2.109011 | 2.937282 |          |          |          |
| ZC3H13   |          |          | 1.737082 | 3.297638 |          |
| CSNK2A1  |          | 3.155441 | 1.87473  |          |          |
| BRIX1    |          |          | 1.222172 |          | 3.770992 |
| EIF4EBP1 | 2.012551 | 2.974014 |          |          |          |
| ME1      |          | 2.477381 |          | 2.508415 |          |
| CAPNS1   | 2.211067 |          | 2.743208 |          |          |
| PNPO     |          |          |          | 2.367809 | 2.570797 |

|          |          |          |          |          |          |
|----------|----------|----------|----------|----------|----------|
| ABCE1    |          |          |          | 2.435538 | 2.501304 |
| GOLGB1   |          |          | 2.234753 | 2.696459 |          |
| MAPRE1   | 1.791286 |          | 3.121137 |          |          |
| ALDOC    |          | 3.591254 | 1.291011 |          |          |
| THOP1    | 1.83052  | 3.0669   | 1.994517 | -2.01548 |          |
| RPSA     | 2.881093 |          | 1.988933 |          |          |
| RPSAP58  | 2.881093 |          | 1.988933 |          |          |
| DHX16    | 2.101774 |          |          |          | 2.768185 |
| PFDN1    | 2.42461  | 2.441221 |          |          |          |
| FAU      | 2.041721 | 2.805489 |          |          |          |
| AKAP1    |          | 2.829234 |          | 2.011758 |          |
| RGPD1    | 1.732433 | 1.693463 |          |          | 1.362749 |
| PTPN11   |          |          |          | 2.256195 | 2.514812 |
| QARS     | 1.311078 | 1.369517 |          |          | 2.080461 |
| HSD17B4  |          |          | 2.48396  | 2.26284  |          |
| MYH14    |          | 2.91099  |          | 1.83238  |          |
| GTF2B    | 1.651819 | 3.085004 |          |          |          |
| RBM4B    |          |          | 2.012748 |          | 2.704939 |
| FLNA     |          |          |          |          | 4.705229 |
| DYNLL2   |          |          |          | 1.914272 | 2.783023 |
| ENO2     | 1.988551 | 2.703322 |          |          |          |
| ERO1L    | 2.105464 | -1.49414 | 1.902549 | 2.165832 |          |
| SNRNP200 |          |          | 1.844081 | 2.831406 |          |
| ZC3H15   |          |          | 2.757377 | 1.855163 |          |
| LIN7A    |          |          | 2.458262 | 2.149582 |          |
| VCP      |          |          | 2.272231 |          | 2.321088 |
| APP      | 2.310159 |          | -4.00934 | 2.624403 | 3.665709 |
| TMED9    |          | 2.547931 | 2.033713 |          |          |
| KIF5B    | 2.305372 | 2.270194 |          |          |          |
| ACTN3    | 2.252729 |          | 2.320214 |          |          |
| IDH3G    |          |          |          | 2.446435 | 2.121665 |
| TBCE     |          | 2.205085 |          |          | 2.339361 |
| COQ9     | 2.333146 |          |          | 2.18664  |          |
| S100A8   |          |          |          | 4.487279 |          |
| CBX3     | 2.15162  |          |          |          | 2.327079 |
| EPHX1    | 2.42765  |          |          | 2.040366 |          |
| RPS6     |          |          | 2.411445 | 2.04335  |          |
| DSP      | 4.434354 |          |          |          |          |
| SLC25A12 | 2.405652 |          | 2.026509 |          |          |
| MSH2     | 1.411942 | 1.427824 |          |          | 1.584785 |
| ERCC6L   | 2.299655 |          |          |          | 2.089868 |
| PPME1    |          |          |          | 1.582711 | 2.783411 |
| XPO5     |          |          |          | 2.242301 | 2.119539 |
| SMARCA5  | 1.906775 |          |          | 2.434429 |          |
| LCP1     |          |          | 2.250931 | 2.090113 |          |
| ITGB1    | 1.567502 |          |          | 2.770795 |          |

|           |          |          |          |          |          |
|-----------|----------|----------|----------|----------|----------|
| LAGE3     | 2.554402 |          |          | 1.78     |          |
| NUP153    | 2.100429 |          |          |          | 2.220596 |
| TCERG1    | 1.11115  |          | 1.651533 |          | 1.556375 |
| GAPVD1    | 4.297182 |          |          |          |          |
| SF3B5     |          |          |          | 1.882338 | 2.406396 |
| SMC1A     | 1.250903 | 1.348833 | 1.667524 |          |          |
| PGK1      | 2.342255 |          |          |          | 1.91809  |
| ASF1A     |          | 4.260295 |          |          |          |
| DAP       |          |          |          |          | 4.253544 |
| NCAPH     | 2.622689 |          | -2.64633 |          | 4.26361  |
| TTC4      |          |          |          | 2.046218 | 2.192495 |
| DYNLRB2   |          |          | 2.021666 | 2.199424 |          |
| SMAP1     | 2.648268 |          |          | 1.562437 |          |
| DCTPP1    | 1.799434 |          |          |          | 2.404791 |
| DDX39B    |          |          | 1.660506 |          | 2.541536 |
| ATP5I     | 2.209109 |          |          |          | 1.989552 |
| ARPC4     | 1.716356 | 2.463381 |          |          |          |
| NANS      | 2.025002 |          |          |          | 2.132202 |
| TTLL12    | 2.391918 |          |          | 1.752711 |          |
| MRI1      | 4.136177 |          |          |          |          |
| HIST1H2AB |          |          |          | 4.125427 |          |
| HIST3H2A  |          |          |          | 4.125427 |          |
| CDK4      |          | 3.111454 | 1.008909 |          |          |
| EXD2      |          |          | 1.955702 | 2.16254  |          |
| GPATCH4   | 1.146351 |          | 2.907607 |          |          |
| KCTD8     | 1.628728 |          |          | 2.411947 |          |
| HPS4      | 4.002302 |          |          |          |          |
| ACIN1     |          |          |          | 1.894929 | 2.097997 |
| CPT2      | 2.606142 |          | 2.640206 | 3.010849 | -4.26801 |
| CKB       | 2.859572 |          | 1.099887 |          |          |
| PRMT8     |          |          | 1.850692 | 2.088374 |          |
| IDH1      | -3.3467  | 3.180389 | 1.80409  |          | 2.286727 |
| RPS27     | 1.88114  |          |          | 1.999324 |          |
| PPA1      | 1.871631 |          |          | 2.00716  |          |
| BANF1     | 1.706804 |          |          |          | 2.151884 |
| KCTD5     |          |          | 1.956284 | 1.893866 |          |
| HAT1      | 2.655587 | 2.98603  | -4.77386 |          | 2.920157 |
| RBM25     |          |          | 1.927971 |          | 1.848004 |
| DNAJB6    | 1.701296 |          |          | 2.06817  |          |
| NOP56     |          |          |          | 3.753756 |          |
| IK        |          |          |          |          | 3.731015 |
| PLOD2     | 1.718174 |          | 2.000222 |          |          |
| CTTN      | -4.30125 | -3.56782 | 2.866922 | 4.860484 | 3.817058 |
| UTP18     |          |          |          | 1.805531 | 1.869702 |
| ALG10B    |          | 3.660608 |          |          |          |
| IDH3B     |          |          |          |          | 3.656461 |

|                |          |          |          |          |          |
|----------------|----------|----------|----------|----------|----------|
| BCL2L10        | 1.669657 |          | 1.974647 |          |          |
| TSN            |          | 2.204109 |          | 1.432603 |          |
| CTSD           | 2.764534 |          | 2.184228 | 1.633458 | -2.96246 |
| LUC7L          | 2.14825  | -3.20381 |          | 2.646635 | 2.012103 |
| GTF3C5         | 3.601875 |          |          |          |          |
| SLC3A2         |          | -3.97392 | 2.14787  | 3.280224 | 2.145836 |
| DLAT           |          |          |          | 3.583364 |          |
| NEDD8          | 1.710424 | -2.54069 | 2.308731 |          | 2.099346 |
| TUBAL3         |          |          |          | 1.486187 | 2.070702 |
| VBP1           |          | 1.757927 | 1.79784  |          |          |
| NASP           | 1.579377 | 1.254726 | 1.565387 | -2.11977 | 1.269363 |
| PGAM5          |          |          |          | 3.532695 |          |
| SF3B2          | 1.581034 |          |          | 1.940455 |          |
| NOL6           | -2.55517 | 3.279881 |          | 2.781378 |          |
| APEH           | 1.921841 |          |          |          | 1.583877 |
| GEMIN7         |          | 3.502426 |          |          |          |
| MAGED1         | 1.546411 |          | 1.942262 |          |          |
| EEF1E1-BLOC1S5 |          | 3.488351 |          |          |          |
| UBE2R2         | 1.658584 |          |          | 1.828429 |          |
| ZNF346         |          |          |          |          | 3.468571 |
| CBX5           |          |          |          | 3.463858 |          |
| ELMOD2         |          |          |          |          | 3.452888 |
| RFC2           | 1.818761 | 1.629611 |          |          |          |
| SNX3           |          |          |          | 1.423574 | 2.022859 |
| PTGES3L-AARSD1 |          | 3.436269 |          |          |          |
| LAMC1          |          |          | 3.42987  |          |          |
| PDCD2L         |          | 3.42431  |          |          |          |
| CHCHD2         |          | 3.419457 |          |          |          |
| CHCHD2P9       |          | 3.419457 |          |          |          |
| DDB1           |          | 4.282996 | 1.675605 | -2.54819 |          |
| ROCK2          |          |          |          | 3.410404 |          |
| ESF1           | 1.533084 |          |          |          | 1.866348 |
| PSAT1          | 3.387672 |          |          |          |          |
| IGF2BP2        |          |          |          | 2.149886 | 1.234563 |
| TCEB1          |          |          | 3.377493 |          |          |
| HDAC6          |          |          | 1.776288 |          | 1.597609 |
| SEPT2          |          |          |          |          | 3.360739 |
| CKM            |          |          |          |          | 3.357243 |
| OMA1           |          |          |          |          | 3.346786 |
| TOM1           |          |          |          | 3.336384 |          |
| PPIE           |          |          |          | 3.317107 |          |
| SREK1          |          |          |          |          | 3.283596 |
| FAIM           |          | 3.276535 |          |          |          |
| ACADVL         |          |          |          |          | 3.273028 |
| CISD2          | 2.705118 | 2.869896 | 2.009394 |          | -4.31148 |
| CFL1           |          |          |          |          | 3.271146 |



|          |          |          |          |
|----------|----------|----------|----------|
| ALDH6A1  | 3.265312 |          |          |
| MAFF     |          | 3.248084 |          |
| YARS     | 3.244497 |          |          |
| PSMD11   | 3.198749 |          |          |
| MRPS12   | 3.192674 |          |          |
| ACOT13   |          | 3.184412 |          |
| TOP2A    |          | 3.179468 |          |
| CSNK2A3  | 3.176461 |          |          |
| CCDC86   |          | 1.070258 | 2.100729 |
| UBP1     |          | 3.154542 |          |
| NUP88    |          | 3.152366 |          |
| POLA2    |          | 1.216492 | 1.925312 |
| LDHC     |          |          | 3.10659  |
| MYO1B    |          |          | 3.102331 |
| ERCC1    | 3.101348 |          |          |
| ATP2B3   | 3.097474 |          |          |
| ATP2B4   | 3.097474 |          |          |
| RBMXL2   |          | 3.086916 |          |
| RGPD2    | 1.693463 |          | 1.362749 |
| NRD1     | 3.055555 |          |          |
| TPM4     |          |          | 3.030962 |
| STK24    | 3.028067 |          |          |
| STK25    | 3.028067 |          |          |
| TPM2     | 3.011784 |          |          |
| LDHAL6B  |          | 2.990718 |          |
| UBE2N    |          |          | 2.980724 |
| TXNRD1   | 2.956062 |          |          |
| TXNRD2   | 2.956062 |          |          |
| NARS     |          | 2.941801 |          |
| MYH10    | 1.556372 | 1.367202 |          |
| CCDC137  |          | 2.878167 |          |
| TOP1MT   | 1.105843 | 1.761203 |          |
| WIBG     |          | 1.47246  | 1.392807 |
| HIST1H4A |          | 2.863412 |          |
| MKI67    |          | 1.527097 | 1.311735 |
| RPL18A   | 1.367772 |          | 1.468623 |
| UAP1     |          |          | 2.822279 |
| SEPT9    |          |          | 2.814901 |
| XPO7     | 1.381979 |          | 1.420289 |
| DARS     | 1.134166 | 1.663665 |          |
| SLC9A3R1 |          | 1.582212 | 1.205664 |
| LAMTOR5  | 2.730291 |          |          |
| AURKB    |          | 2.717967 |          |
| TFG      | 2.675364 |          |          |
| COPB1    |          | 2.664215 |          |
| GANAB    |          |          | 2.659805 |

|         |          |          |          |          |          |
|---------|----------|----------|----------|----------|----------|
| ECM29   |          |          |          | 2.645276 |          |
| IARS    | 2.031098 | 2.638719 |          | -2.02828 |          |
| C3orf17 |          |          |          |          | 2.631293 |
| CDH2    |          | 2.631163 |          |          |          |
| CYB5R3  |          |          |          | 2.61453  |          |
| RALYL   |          |          |          | 2.587561 |          |
| ZNF512  |          |          |          |          | 2.586006 |
| DCD     |          |          |          |          | 2.580951 |
| CCAR2   |          | 2.569742 |          |          |          |
| PPIL4   |          |          |          |          | 2.551956 |
| GLUD2   |          |          |          | 2.535096 |          |
| DHFR    |          |          |          |          | 2.528393 |
| EIF1B   | 2.526719 |          |          |          |          |
| CALM1   |          |          | 2.515178 |          |          |
| OAT     | 2.510232 |          |          |          |          |
| GOT2    |          |          |          | 2.484841 |          |
| MGA     |          |          |          | 2.473859 |          |
| MRPL53  |          |          |          | 2.473469 |          |
| HEATR1  |          |          |          | 2.438567 |          |
| TUBA8   | 2.417177 |          |          |          |          |
| SEC11A  |          |          |          | 2.416614 |          |
| TOP2B   |          |          |          |          | 2.406301 |
| PITPNB  |          |          |          |          | 2.401744 |
| NDNL2   | 2.389726 |          |          |          |          |
| NAPA    |          |          |          | 2.356112 |          |
| ADK     |          |          |          |          | 2.347189 |
| RPS20   |          |          |          |          | 2.342137 |
| PDCD10  |          |          |          |          | 2.333198 |
| NUP54   |          |          |          | 2.332131 |          |
| CPSF3   | 1.123438 | 1.207329 |          |          |          |
| ATP5L   |          |          |          | 2.328549 |          |
| HOGA1   |          | 5.126284 |          |          | -2.80046 |
| PSMD6   |          | 2.317931 |          |          |          |
| ILVBL   |          |          | 2.309169 |          |          |
| HMGB2   |          |          |          |          | 2.304626 |
| PRDX1   | 2.303121 |          |          |          |          |
| PPP1R10 |          |          |          | 2.299803 |          |
| TUBB6   |          |          |          |          | 2.29837  |
| CKS2    |          |          |          |          | 2.286614 |
| RPLP0   | 2.273211 |          |          |          |          |
| STIP1   | 1.106559 | 1.164233 |          |          |          |
| PDHB    |          |          | -1.05296 | 1.606184 | 1.70882  |
| COG4    |          |          |          |          | 2.25602  |
| SNRPA1  |          |          |          |          | 2.251942 |
| PSMA4   | 2.328312 | 2.331153 | 1.218382 | -3.62694 |          |
| QKI     |          |          | 2.247704 |          |          |

|             |          |          |          |          |
|-------------|----------|----------|----------|----------|
| TES         | 2.245258 |          |          |          |
| LRPAP1      |          |          |          | 2.242278 |
| hCG_1789329 | 2.234425 |          |          |          |
| UBE2L3      | 2.234425 |          |          |          |
| USP7        |          |          |          | 2.218452 |
| DAZAP1      |          |          |          | 2.177688 |
| PSMD10      |          |          |          | 2.170099 |
| EIF2B2      |          |          |          | 2.168518 |
| DDOST       | 2.159271 |          |          |          |
| IDI1        |          |          | 2.156117 |          |
| TAGLN3      | 2.148493 |          |          |          |
| PFDN4       |          |          | 2.145523 |          |
| TMF1        |          |          |          | 2.132511 |
| TUBB8       |          |          | 2.128161 |          |
| KIAA1033    | 2.097702 |          |          |          |
| DHX33       | 2.096235 |          |          |          |
| EIF2A       |          | 3.045419 | 1.551684 | -2.51465 |
| INCENP      |          |          | 2.078357 |          |
| ANP32E      | 2.072497 |          |          |          |
| LDHB        | 2.071007 |          |          |          |
| HIST3H3     |          |          | 2.064585 |          |
| TMEM9       |          |          | 2.054093 |          |
| PFDN5       |          |          | 2.052757 |          |
| TUBA4A      |          | 2.042978 |          |          |
| CCT6B       |          |          | 2.028045 |          |
| MRI1        |          |          | 2.01823  |          |
| EXOSC2      |          | 2.015669 |          |          |
| FDX1        |          |          |          | 2.010488 |
| MKL1        |          |          |          | 2.000062 |
| MIF         | 1.998038 |          |          |          |
| PRCC        |          | 1.997925 |          |          |
| NDUFB10     | -1.11476 |          | 3.112591 |          |
| NAA50       |          |          |          | 1.973319 |
| KTI12       |          |          | 1.964778 |          |
| EIF3D       |          | -2.89    | 2.323016 | 2.529778 |
| ZNF598      |          |          | 1.962391 |          |
| METAP2      |          |          |          | 1.923882 |
| NUFIP2      |          |          | 1.920692 |          |
| CISD1       | 1.91902  |          |          |          |
| POLR2A      | 2.577901 | -2.49721 |          | 1.835639 |
| SEPT8       |          | 1.912634 |          |          |
| SEPT11      |          | 1.912634 |          |          |
| SMEK1       |          |          | 1.901475 |          |
| PSMD14      | 1.901163 |          |          |          |
| BAZ1B       |          | 1.894201 |          |          |
| LDHAL6A     | 1.789159 | -3.01609 |          | 3.10659  |

|           |          |          |          |          |          |
|-----------|----------|----------|----------|----------|----------|
| FBL       |          |          |          |          | 1.876947 |
| PFDN6     |          |          |          | 1.865474 |          |
| MARCKSL1  | 1.865082 |          |          |          |          |
| PITHD1    |          |          |          | 1.864952 |          |
| PPP1R12C  | 1.863474 |          |          |          |          |
| HIST1H2AC | 1.861164 |          |          |          |          |
| NDUFA4    | -1.24583 |          |          | 3.105566 |          |
| AIMP1     | -2.25539 | 3.074346 | -2.31634 | 3.356424 |          |
| RNF40     | -1.63349 |          |          |          | 3.472232 |
| CUL1      | 1.828719 |          |          |          |          |
| IMPA1     |          |          |          | 1.825188 |          |
| TTC9C     | 1.821079 |          |          |          |          |
| TBCD      |          |          |          | 1.81254  |          |
| UHRF1     |          |          |          | 1.806173 |          |
| MAPKAPK2  | 1.798719 |          |          |          |          |
| MAPKAPK3  | 1.798719 |          |          |          |          |
| PDCD6     | 1.783259 |          |          |          |          |
| TXNL1     |          |          |          | 1.764343 |          |
| POLD1     | 1.763066 |          |          |          |          |
| FMR1      | 2.987731 | 3.420831 | 2.589099 | -2.53209 | -4.71424 |
| PFN1      | 1.743875 |          |          |          |          |
| VPS36     | 1.743385 |          |          |          |          |
| C10orf71  | 1.731166 |          |          |          |          |
| NOB1      | 1.729767 |          |          |          |          |
| MRPL32    | 1.710582 |          |          |          |          |
| ANKHD1    | 1.710544 |          |          |          |          |
| CTPS1     | 1.704521 |          |          |          |          |
| DHX36     |          |          | 1.697293 |          |          |
| APRT      | 1.686382 |          |          |          |          |
| SUZ12     | 1.685997 |          |          |          |          |
| CCDC51    |          |          | 2.237144 | -3.81064 | 3.233808 |
| FKBP1A    | -3.57973 | 3.971498 | 3.326964 | -2.06275 |          |
| FAM207A   | 1.652359 |          |          |          |          |
| UBA1      | 1.647073 |          |          |          |          |
| DIAPH1    | 1.633387 |          |          |          |          |
| ARPC5L    |          |          | 1.632602 |          |          |
| CBX8      |          |          | 1.61811  |          |          |
| KIF4A     |          |          |          |          | 1.599431 |
| PRIM1     | 1.597759 |          |          |          |          |
| EIF3A     |          |          |          | 1.592466 |          |
| SEC23IP   | -3.10191 |          |          | 2.242155 | 2.451845 |
| FXR1      |          |          |          |          | 1.580384 |
| SGTA      |          |          | 1.575902 |          |          |
| COX5B     | 3.780925 | -2.20824 |          |          |          |
| CARHSP1   |          |          | 1.57065  |          |          |
| CHD3      |          |          |          | 1.562453 |          |

|           |          |          |          |          |
|-----------|----------|----------|----------|----------|
| FAM98A    |          |          | 1.557329 |          |
| PM20D2    | 1.554792 |          |          |          |
| DNAH17    |          |          |          | 1.548303 |
| EARS2     |          |          | 1.513715 |          |
| PPP2R2A   | 1.511792 |          |          |          |
| MAD1L1    |          |          | 1.509956 |          |
| C19orf47  |          |          | 1.505053 |          |
| POTEKP    |          | 1.504923 |          |          |
| LRRC47    |          | 1.488033 |          |          |
| SCFD1     |          |          | 1.472808 |          |
| PTBP1     | -3.70981 |          | 2.716732 | 2.451078 |
| FXR2      |          |          |          | 1.445578 |
| YME1L1    | 2.878041 | 2.931416 | -4.38153 |          |
| EEF1A1    |          | 1.402572 |          |          |
| HIST1H2AA | 2.666481 | -3.36735 |          | 2.092809 |
| HIST2H2AB | 2.666481 | -3.36735 |          | 2.092809 |
| RPS10P5   |          | 1.374198 |          |          |
| TRMT112   |          |          |          | 1.364311 |
| HSPA9     |          | 1.335724 |          |          |
| G3BP1     | 1.290525 |          |          |          |
| SLC25A6   | -1.16807 |          | 2.45634  |          |
| EIF5AL1   |          | 1.276704 |          |          |
| RNH1      | 1.271124 |          |          |          |
| EMG1      | -2.02582 | 1.805193 |          | 1.483146 |
| DCP1A     |          | 1.192596 |          |          |
| PKLR      |          |          |          | 1.155769 |
| COTL1     | 1.148505 |          |          |          |
| HSPA4L    |          | 3.456945 | -2.31391 |          |
| TUBB4B    | 1.141674 |          |          |          |
| ACTG1     |          | 1.134789 |          |          |
| DNAJC9    |          |          |          | 1.128284 |
| TUBA3E    |          | 1.110002 |          |          |
| GTF3C1    |          | 1.093405 |          |          |
| POLR1A    |          | 1.088984 |          |          |
| TRIM28    |          | 1.076259 |          |          |
| RBM12B    | 4.264436 | -1.02965 | -2.16828 |          |
| EIF4E     |          | 3.139668 | -2.07665 |          |
| ZNF280C   |          | 1.058779 |          |          |
| VAT1      |          | -1.14081 | 2.183554 |          |
| EDC4      |          | 1.037882 |          |          |
| ACAT1     |          | 3.012769 | -1.99768 |          |
| UTP14A    | 1.543426 | -2.95243 |          | 2.36726  |
| HNRNPK    | 1.607343 |          | 3.125805 | -3.77508 |
| FIP1L1    | 2.227989 | -2.95753 | 1.609962 |          |
| PGLS      | -2.49142 | 3.325103 |          |          |
| POLR2C    | 2.819616 |          | -4.06338 | 2.066271 |

|               |          |          |          |          |          |
|---------------|----------|----------|----------|----------|----------|
| SDHB          | 2.094945 |          | -1.28684 |          |          |
| PSMD2         | 1.142714 | 1.114172 | -2.77287 |          | 1.218004 |
| FDXR          |          | 3.204603 | -6.12944 |          | 3.569308 |
| TMEM109       |          | -4.65048 |          | 1.583293 | 3.660171 |
| CENPV         | -2.31943 | 1.195371 |          |          | 1.713292 |
| DDX27         | -3.1148  | 4.658491 | -3.22569 | 2.207918 |          |
| ATP2A1        | -2.25179 | 2.757501 |          |          |          |
| PPP4C         | 1.822557 |          |          | 2.451841 | -3.78508 |
| HSP90AA2P     | 2.035183 |          |          | 2.69993  | -4.27412 |
| MYL6          | 2.523746 | -4.42517 | -2.05638 | 2.022944 | 2.364625 |
| FAR1          |          |          | 2.145449 |          | -1.74231 |
| TM9SF3        |          | -2.42335 | 2.810339 |          |          |
| GOLIM4        | -1.98079 |          |          |          | 2.353958 |
| PHB           | -1.37903 | -1.10556 |          | 2.830857 |          |
| POLR2H        | -2.29213 |          | 2.606262 |          |          |
| PPP2R2C       | 1.511792 |          |          | 1.916157 | -3.11802 |
| MORF4L1       | -2.4343  | 2.730774 |          |          |          |
| C5orf24       | 8.395375 | -4.25919 |          |          | -3.90998 |
| DDX23         | -2.14659 |          |          |          | 2.202271 |
| NDUFS1        |          | -2.23322 |          |          | 2.272472 |
| ME2           |          | -2.61488 | -2.01857 | 2.436454 | 2.221229 |
| PHF3          |          |          | -1.95916 |          | 1.951484 |
| PRRC2C        | 2.79258  |          | -3.01498 | 2.843893 | -2.65192 |
| AKAP8         |          | -3.48758 |          |          | 3.432349 |
| PRKAG1        |          |          | -3.12308 | 3.030451 |          |
| ANXA7         | -3.08853 | -2.58288 |          | 2.082532 | 3.42387  |
| PAK2          |          |          | -3.75914 |          | 3.578705 |
| PPP5D1        | -2.33335 | 4.017922 | -1.90666 |          |          |
| EIF3I         |          |          | -2.59065 | 2.226455 |          |
| SRSF5         | 2.704261 | -3.13381 |          |          |          |
| POLR1E        | 1.666938 |          |          |          | -2.16166 |
| MTHFD2        | -2.65982 |          |          | 2.079437 |          |
| CAPN1         |          | -3.02697 |          |          | 2.445969 |
| CCT3          | -2.61403 |          |          | 2.007019 |          |
| CBR4          |          | -2.60098 |          | 1.989354 |          |
| SMC2          |          | 2.70295  | -3.31502 |          |          |
| GALK1         |          |          | -2.51655 | 1.890616 |          |
| SLC7A1        | -2.57785 |          |          | 1.939308 |          |
| NCKAP1        |          | -2.67451 |          | 2.022791 |          |
| PYGL          | 1.804683 | 1.732025 |          | -4.2291  |          |
| ACOT7         | 1.685864 |          |          | -2.37895 |          |
| RPL6          | 2.4604   | -2.73123 | 2.489208 |          | -3.07829 |
| TCEA1         |          | -3.12765 |          |          | 2.178464 |
| PRKDC         |          |          | -2.57109 |          | 1.577578 |
| DKFZp686E0752 | -2.86777 |          | 2.100582 | -2.12242 | 1.888466 |
| NUP93         |          | -3.01937 |          |          | 2.008665 |

|          |          |          |          |          |          |
|----------|----------|----------|----------|----------|----------|
| PPP1R14B |          |          | -1.01396 |          |          |
| PPP5C    | -2.33335 | 3.218278 | -1.90666 |          |          |
| RUVBL2   |          |          | -1.04516 |          |          |
| RB1      |          |          | -1.06257 |          |          |
| SF3B4    |          |          | -1.09069 |          |          |
| ATG3     |          |          | 1.94484  | -3.03867 |          |
| DDT      |          |          | -2.90901 | 1.814752 |          |
| DDTL     |          |          | -2.90901 | 1.814752 |          |
| SNRNP70  | 1.826642 | -5.57603 | 3.11858  | 2.169871 | -2.64592 |
| UQCRC2   |          |          |          |          | -1.1091  |
| HSPA13   | -1.11566 |          |          |          |          |
| SPTBN4   |          |          | -1.128   |          |          |
| CAMSAP3  | -1.14555 |          |          |          |          |
| LMNB1    |          |          |          |          | -1.14797 |
| STAMBP   |          |          | -1.17408 |          |          |
| SEC24C   | -1.17618 |          |          |          |          |
| NKTR     |          |          | -1.19658 |          |          |
| MCL1     | -4.27492 |          |          | 3.074545 |          |
| ERLIN2   |          | -1.21726 |          |          |          |
| GSR      |          |          | -1.22906 |          |          |
| LYPLAL1  |          |          | -1.24517 |          |          |
| COPB1    |          |          | -1.24529 |          |          |
| TMLHE    |          |          | -1.27025 |          |          |
| RNPS1    |          |          |          |          | -1.2714  |
| PFDN5    |          |          | -1.27554 |          |          |
| CGGBP1   | -1.28207 |          |          |          |          |
| PRSS1    |          | -1.30976 |          |          |          |
| PRSS2    |          | -1.30976 |          |          |          |
| PRSS3P2  |          | -1.30976 |          |          |          |
| CWC15    |          |          |          |          | -1.32896 |
| SPG20    |          |          |          |          | -1.33557 |
| CDC45    |          |          | -1.40076 |          |          |
| TRO      |          |          | -1.4076  |          |          |
| PDCD11   | -1.41131 |          |          |          |          |
| PPP6R1   |          |          | -1.4252  |          |          |
| PHC2     |          |          | -1.42766 |          |          |
| MARK3    |          |          | -1.44908 |          |          |
| MARK4    |          |          | -1.44908 |          |          |
| NDUFS4   |          |          | -1.44972 |          |          |
| HCFC1    |          |          |          |          | -1.48259 |
| C19orf52 |          |          | -1.4936  |          |          |
| RAP1A    |          |          |          | -1.5022  |          |
| OSBPL11  | -1.51357 |          |          |          |          |
| GCN1L1   |          |          |          | -1.51573 |          |
| ACTR3    | -3.30561 |          |          | 1.761343 |          |
| RGPD5    |          |          | -1.55343 |          |          |

|         |          |          |          |          |
|---------|----------|----------|----------|----------|
| ALDH1L2 |          |          | -1.55708 |          |
| DNM3    | -1.56321 |          |          |          |
| NSUN4   |          | -1.60201 |          |          |
| NOMO3   | -1.6223  |          |          |          |
| TMED2   | -1.62377 |          |          |          |
| AIG1    |          |          | -1.63224 |          |
| RING1   |          |          |          | -1.70282 |
| CSTF2   |          |          |          | -1.7048  |
| PHF23   |          | -3.35671 | 1.614554 |          |
| DCXR    | -1.7558  |          |          |          |
| TTC7A   |          | -1.75771 |          |          |
| ZFR     | 2.735266 |          | -4.4941  |          |
| PMPCB   |          |          |          | -1.76768 |
| HIBADH  | 1.951777 |          | -3.74184 |          |
| MAP4    |          |          | -4.03182 | 2.212317 |
| ICT1    |          | -1.82779 |          |          |
| DECR1   |          | -1.83704 |          |          |
| POM121  |          |          | -1.85735 |          |
| POM121C |          |          | -1.85735 |          |
| RGPD3   |          | -1.87203 |          |          |
| RGPD4   |          | -1.87203 |          |          |
| RPL39   |          | -4.28311 |          | 2.406652 |
| RPL39P5 |          | -4.28311 |          | 2.406652 |
| AHCTF1  |          | -1.9028  |          |          |
| MTDH    | -1.90429 |          |          |          |
| MED1    |          | -1.9071  |          |          |
| NACC1   |          | -1.90732 |          |          |
| NACC2   |          | -1.90732 |          |          |
| CHD3    |          |          | -1.90974 |          |
| LLGL1   |          | -6.26829 | 4.358447 |          |
| WDR46   |          |          | -1.91871 |          |
| RAB21   |          | -1.9247  |          |          |
| LYPLA2  |          |          | -1.92699 |          |
| DDX27   |          |          | -1.92927 |          |
| SPTBN2  |          | -1.95511 |          |          |
| CBX2    | -1.96467 |          |          |          |
| ELF2    |          | -1.96661 |          |          |
| RPL27   |          |          | -1.96694 |          |
| UBE2I   |          | -1.96844 |          |          |
| LYRM7   |          | -1.98578 |          |          |
| SHMT1   |          |          | -2.00473 |          |
| RPL11   |          |          | -2.00553 |          |
| GBA     | -2.0069  |          |          |          |
| PDXK    |          | 2.768878 | -2.16858 | -2.61168 |
| NDUFAB1 |          | -2.01155 |          |          |
| RNF214  |          |          | -2.01206 |          |



|              |          |          |          |          |
|--------------|----------|----------|----------|----------|
| EEFSEC       |          |          | -2.0158  |          |
| PAIP1        |          | -2.01615 |          |          |
| LRRFIP1      |          |          | -2.01838 |          |
| ELAC2        |          | -2.02737 |          |          |
| CUTC         |          |          | -2.03018 |          |
| FAM49B       |          |          | -2.03267 |          |
| CTNND1       |          |          |          | -2.04058 |
| ASCC2        |          |          |          | -2.0573  |
| KRBA2        | -2.06098 |          |          |          |
| HIST1H2BA    |          |          | -2.0687  |          |
| KMT2C        |          |          | -2.07202 |          |
| ATP2C1       |          |          | -2.07212 |          |
| PSMG2        | -2.07872 |          |          |          |
| LAP3         | -2.08313 |          |          |          |
| RNF114       |          | -2.08724 |          |          |
| THOC6        |          | -2.08785 |          |          |
| RPL26L1      | -2.09442 |          |          |          |
| GTF3C5       | -2.09759 |          |          |          |
| HIGD1A       |          | -2.10586 |          |          |
| HIGD1C       |          | -2.10586 |          |          |
| C1orf131     |          | -2.1067  |          |          |
| EMC10        |          |          | -2.10896 |          |
| PPAT         |          |          | -2.1158  |          |
| DDRGK1       |          |          | -2.12927 |          |
| CYB5R3       |          |          | -2.13262 |          |
| AP2B1        |          |          | -2.13341 |          |
| KIF2C        |          |          |          | -2.13493 |
| HIST3H3      |          |          | -2.1374  |          |
| LCLAT1       |          | -2.13954 |          |          |
| TMPO         |          |          |          | -2.14128 |
| DBR1         |          | -2.1424  |          |          |
| KRT77        | -2.14284 |          |          |          |
| CCDC58       |          | -2.14546 |          |          |
| MAN2B1       |          | -2.14592 |          |          |
| TRMT1        |          |          |          | -2.14991 |
| MOGS         |          |          | -2.15906 |          |
| PAPSS1       | -2.15919 |          |          |          |
| PAK1IP1      |          | -2.16245 |          |          |
| TMED7        |          |          |          | -2.16247 |
| TMED7-TICAM2 |          |          |          | -2.16247 |
| ALDH9A1      |          |          | -2.16259 |          |
| ACAD9        | 3.09858  | -2.15766 | -3.10984 |          |
| LETM1        |          |          | -2.17562 |          |
| SLC25A5      |          |          |          | -2.18192 |
| CDCA7        |          |          | -2.18226 |          |
| ANXA4        |          |          | -2.19009 |          |

|             |          |          |          |          |          |
|-------------|----------|----------|----------|----------|----------|
| SSR4        |          |          |          |          | -2.19183 |
| CORO7-PAM16 | -2.19195 |          |          |          |          |
| NDUFA3      |          |          |          |          | -2.19232 |
| SYAP1       | -2.21275 |          |          |          |          |
| KIF16B      |          |          | -2.21275 |          |          |
| KIF3A       |          |          | -2.21275 |          |          |
| KIF6        |          |          | -2.21275 |          |          |
| MAGOH       |          |          |          | -2.21309 |          |
| XPO1        |          |          |          |          | -2.21806 |
| ARL1        |          |          | -2.22219 |          |          |
| POLDIP2     | 1.926464 |          | -4.14988 |          |          |
| RABL6       | -2.22525 |          |          |          |          |
| HMOX2       | -3.79263 | -2.68123 | -2.03253 | 4.239977 | 2.036748 |
| PGM1        | -2.236   |          |          |          |          |
| LRRC59      |          |          |          | -2.24738 |          |
| CNIH4       |          | -2.24852 |          |          |          |
| CRLF3       |          |          |          | -2.25463 |          |
| NFKBIL1     | -2.25674 |          |          |          |          |
| DLG1        |          |          |          |          | -2.25945 |
| ATP6V1D     |          |          |          | -2.26013 |          |
| GPT2        |          | -2.26076 |          |          |          |
| IRAK1       |          |          | -2.2662  |          |          |
| UBR4        |          |          |          | -2.26954 |          |
| PREB        |          |          | -2.27082 |          |          |
| VPS26A      |          |          | -2.28432 |          |          |
| C12orf73    |          |          |          |          | -2.29409 |
| CALD1       |          |          |          | -2.29589 |          |
| ALDH5A1     |          | -2.32574 |          |          |          |
| KRTCAP2     |          |          |          |          | -2.3308  |
| SYNJ2BP     | -2.33112 |          |          |          |          |
| NSDHL       |          |          |          |          | -2.33696 |
| FAM114A2    |          |          |          |          | -2.33745 |
| DCBLD2      |          |          | -2.33989 |          |          |
| HDLBP       | 2.182006 |          | -4.52934 |          |          |
| TBL2        |          |          |          | -2.34997 |          |
| NDUFAF2     | -2.35618 |          |          |          |          |
| NOP16       |          |          | -2.35907 |          |          |
| RAB14       | -2.35919 |          |          |          |          |
| LAMTOR3     |          |          |          | -2.37282 |          |
| SUPT6H      |          |          |          | -2.37395 |          |
| ANAPC10     |          |          |          | -2.37431 |          |
| KIF21B      |          |          |          |          | -2.37699 |
| BPNT1       |          |          | -2.38095 |          |          |
| MANBAL      |          |          |          |          | -2.38513 |
| MYL12B      |          |          |          | -2.38689 |          |
| AP3M1       |          |          |          | -2.39502 |          |

|                |          |          |          |          |          |
|----------------|----------|----------|----------|----------|----------|
| TST            |          |          |          |          | -2.40344 |
| MRRF           |          |          | -2.41219 |          |          |
| PSMB5          |          |          | -2.41301 |          |          |
| MT-CO2         | -2.41993 |          |          |          |          |
| GNL1           | -2.42219 |          |          |          |          |
| HLA-A          |          |          |          |          | -2.42323 |
| LAMP2          |          | -2.42551 |          |          |          |
| C7orf55        |          |          |          | -2.42772 |          |
| CD276          |          |          | -2.43508 |          |          |
| RFC3           |          |          |          |          | -2.43529 |
| RBMXL2         |          |          |          | -2.44121 |          |
| VPS33A         |          |          |          | -2.44632 |          |
| PDIP46         |          |          |          | -2.44674 |          |
| BUD31          |          |          |          |          | -2.44734 |
| HADH           |          |          |          | -2.45223 |          |
| NCAPD3         |          |          | -2.45663 |          |          |
| LPCAT1         |          |          | -2.47489 |          |          |
| ACTB           |          |          |          |          | -2.48538 |
| PGD            |          |          |          |          | -2.48798 |
| GPX1           |          |          |          | -2.49268 |          |
| DKFZp586I031   | -1.73296 | -4.60639 |          | 3.84153  |          |
| ZC3HAV1        |          |          |          | -2.502   |          |
| RRP1B          |          |          |          | -2.5031  |          |
| HNRNPUL2-BSCL2 | 2.337714 | -1.13266 |          | -2.33118 | -1.37867 |
| NIPBL          |          |          | -2.50935 |          |          |
| CYFIP1         |          |          | -2.51274 |          |          |
| SLC33A1        |          | -2.51406 |          |          |          |
| DHCR24         |          |          |          | -2.51668 |          |
| Nbla03646      |          |          |          | -2.51668 |          |
| KTN1           |          |          |          |          | -2.52017 |
| ARPC4-TTLL3    |          | -2.52035 |          |          |          |
| TIMM10B        |          | -2.52139 |          |          |          |
| TMOD3          |          |          | -2.527   |          |          |
| PC             |          | -2.52993 |          |          |          |
| CKMT2          |          |          |          |          | -2.52996 |
| RBM23          |          |          |          |          | -2.53505 |
| UTP6           |          |          |          | -2.53598 |          |
| PCBP3          |          |          |          |          | -2.53672 |
| NEDD8-MDP1     |          | -2.54069 |          |          |          |
| GATAD2A        | -2.54238 |          |          |          |          |
| UBAP2L         |          |          |          | -2.54363 |          |
| TARS           |          |          |          |          | -2.54737 |
| B2M            |          |          |          |          | -2.5549  |
| SYNJ2BP-COX16  |          | -2.55547 |          |          |          |
| NUDCD1         | -2.55761 |          |          |          |          |
| SFN            |          |          | -2.56022 |          |          |

|                |          |          |          |          |          |
|----------------|----------|----------|----------|----------|----------|
| GLUD1          |          |          |          |          | -2.56539 |
| KPNA1          |          |          | -2.5723  |          |          |
| SSR1           |          | -2.57662 |          |          |          |
| DKFZp781M17165 |          |          |          | -2.57858 |          |
| PPP2R4         |          |          |          | -2.57858 |          |
| OSBPL8         |          |          | -2.58392 |          |          |
| MCM7           |          |          |          | -2.58545 |          |
| GDI1           |          |          |          |          | -2.59405 |
| CSNK1A1L       |          |          |          | -2.59422 |          |
| CD81           | -2.13584 | -2.71173 |          |          | 2.252493 |
| HNRNPLL        |          |          | -2.59659 |          |          |
| HNRPLL         |          |          | -2.59659 |          |          |
| URB1           |          | -2.59711 |          |          |          |
| GAR1           | -2.59725 |          |          |          |          |
| ATP5SL         | -1.35189 |          |          |          | -1.24605 |
| LRRFIP2        |          |          | -2.59839 |          |          |
| PSMD10         |          |          |          |          | -2.59897 |
| TBC1D5         |          |          | -2.62504 |          |          |
| G3BP1          |          | -2.62567 |          |          |          |
| WBP11          |          |          |          |          | -2.62712 |
| CPOX           |          |          | -4.03028 | 1.400861 |          |
| ELAVL1         |          | -2.62984 |          |          |          |
| RAP2C          | -2.07935 | -4.01827 |          | 3.458712 |          |
| RAP2A          | -2.07935 | -4.01827 |          | 3.458712 |          |
| RAP2B          | -2.07935 | -4.01827 |          | 3.458712 |          |
| FAM162A        |          | 3.274371 |          | -5.92341 |          |
| GNA11          |          |          | -2.68151 |          |          |
| GNA14          |          |          | -2.68151 |          |          |
| GNAQ           |          |          | -2.68151 |          |          |
| EED            |          | -2.68349 |          |          |          |
| MTX2           | -2.68509 |          |          |          |          |
| LUC7L3         |          | -2.68672 |          |          |          |
| C1orf131       |          | -2.68681 |          |          |          |
| SLC39A9        |          |          |          |          | -2.69056 |
| MRPL46         |          |          | 2.069481 |          | -4.76571 |
| UQCRB          |          |          |          |          | -2.69701 |
| CKAP5          | 2.486409 | 3.313976 |          | -3.74204 | -4.76417 |
| C17orf85       |          |          | -2.70602 |          |          |
| SLC25A12       | -1.17503 |          | -1.53207 |          |          |
| DKFZp586F0420  |          |          |          |          | -2.7083  |
| ANKFY1         |          |          |          |          | -2.7113  |
| RPL5           | -2.71899 |          |          |          |          |
| PLOD1          |          |          |          |          | -2.72175 |
| PPIAL4A        | -2.72575 |          |          |          |          |
| USF1           |          |          | -2.73449 |          |          |
| B4GAT1         |          |          |          |          | -2.74096 |

|          |          |          |          |          |          |
|----------|----------|----------|----------|----------|----------|
| BSG      | -2.74244 |          |          |          |          |
| COG4     |          |          |          |          | -2.74649 |
| NDUFB9   | 2.025071 | -4.7867  |          |          |          |
| ZC3H18   |          |          | -2.76245 |          |          |
| C19orf43 |          |          | -5.83286 | 3.070379 |          |
| MOB1A    | -2.77684 |          |          |          |          |
| MOB1B    | -2.77684 |          |          |          |          |
| HACL1    |          |          | -2.78187 |          |          |
| ACSL4    |          |          |          |          | -2.79607 |
| MYH9     |          |          |          | -2.79751 |          |
| CCT5     |          |          |          | -2.79829 |          |
| ZC3H4    |          |          |          |          | -2.79999 |
| ARID1A   |          | -5.56581 |          | 2.76516  |          |
| PYGM     |          |          |          | -2.81144 |          |
| DSTN     |          |          |          |          | -2.81499 |
| A2M      |          | -2.82526 |          |          |          |
| PVR      |          |          | -2.83681 |          |          |
| MCM2     | -4.4692  |          |          | 1.627222 |          |
| ATAD3C   |          |          | -2.86274 |          |          |
| SPEN     |          |          |          |          | -2.86463 |
| ZC3H11A  | -2.87425 |          |          |          |          |
| DDHD2    |          |          |          |          | -2.87826 |
| WTAP     |          |          |          |          | -2.87976 |
| KIF21A   |          |          |          |          | -2.88117 |
| HIST3H3  |          |          |          | -2.88293 |          |
| UBR2     |          |          |          | -2.88687 |          |
| EMD      | -2.89008 |          |          |          |          |
| MSH3     |          | -2.89048 |          |          |          |
| ITM2B    |          |          |          |          | -2.90677 |
| GTPBP4   |          |          |          | -2.91561 |          |
| SH3BGR13 |          |          | -2.91687 |          |          |
| NIPSNAP1 |          |          | -1.11274 |          | -1.81062 |
| CD47     | -2.92683 |          |          |          |          |
| HK2      |          |          | -2.92789 |          |          |
| C8orf33  | -2.9483  |          |          |          |          |
| RNASET2  |          |          |          | -2.95704 |          |
| UPF1     | -2.95958 |          |          |          |          |
| NUP88    |          |          |          | -2.96026 |          |
| CTR9     |          |          | -2.97888 |          |          |
| SPIN1    |          |          |          |          | -2.99229 |
| ZNF638   | -1.90258 | -1.10911 |          |          |          |
| NUMA1    | 2.356666 | 3.318138 | -3.38665 | 2.259956 | -7.56077 |
| MRPS31   |          | -1.1554  |          | -1.85732 |          |
| XPC      |          | -3.01683 |          |          |          |
| AMOT     |          |          |          | -3.02075 |          |
| CRYZ     |          |          | -3.02327 |          |          |

|            |          |          |          |
|------------|----------|----------|----------|
| MCTS1      | -3.03121 |          |          |
| GEMIN6     |          |          | -3.03303 |
| ERAL1      | -1.66199 |          | -1.37161 |
| SARNP      |          | -3.03775 |          |
| CHTOP      |          | -1.83287 | -1.20788 |
| METTL2A    | -3.04348 |          |          |
| METTL2B    | -3.04348 |          |          |
| C21orf59   | -3.04659 |          |          |
| MAPK3      | -3.04997 |          |          |
| NABP2      | -3.064   |          |          |
| CROCC      | -3.06424 |          |          |
| GADD45GIP1 |          | -1.74697 | -1.31996 |
| COPE       |          | -3.07316 |          |
| EPRS       |          |          | -3.07368 |
| RANGAP1    | -3.07439 |          |          |
| EIF1AX     |          | -3.07791 |          |
| ABCE1      |          | -3.08331 |          |
| NT5C3B     |          |          | -3.08342 |
| UPF3B      |          |          | -3.09273 |
| KRT5       |          | -3.09786 |          |
| HSP90AA5P  | -3.10333 |          |          |
| SRSF7      | -3.10382 |          |          |
| DHX15      | -3.10422 |          |          |
| MAP2K4     |          | -3.11497 |          |
| RARS       |          | -3.11519 |          |
| KRT5       | -3.11605 |          |          |
| HSPBP1     |          |          | -3.11635 |
| S100A13    |          | -3.11925 |          |
| MYH1       |          |          | -3.12378 |
| MYH13      |          |          | -3.12378 |
| MYH2       |          |          | -3.12378 |
| CEP170     |          | -3.12517 |          |
| SEC61B     | -3.12897 |          |          |
| YIPF5      |          |          | -3.13226 |
| LSS        | -5.32797 |          | 2.191629 |
| MRPL49     |          | -1.60293 | -1.53817 |
| U2AF2      |          |          | -3.14343 |
| EIF6       | -3.14464 |          |          |
| CLASP2     |          |          | -3.15945 |
| HSP90B2P   |          |          | -3.16336 |
| NUP188     | -3.16376 |          |          |
| AATF       |          |          | -3.1651  |
| RAB8A      |          |          | -3.16979 |
| PREP       | -3.17079 |          |          |
| PPP2R1A    | -1.72012 | 1.30445  | -2.76007 |
| BLMH       |          | -1.73566 | -1.44336 |

|           |          |          |          |          |
|-----------|----------|----------|----------|----------|
| MAP1LC3B  |          |          |          | -3.18523 |
| MAP1LC3B2 |          |          |          | -3.18523 |
| GNB2      | -3.19418 |          |          |          |
| SNX18     |          |          | -3.19827 |          |
| GPD1L     |          |          | -3.20154 |          |
| SYNGR2    | -3.20197 |          |          |          |
| SREK1     |          |          |          | -3.20439 |
| RSU1      |          |          |          | -3.21191 |
| SLC25A10  |          | -1.8962  |          | -1.32037 |
| GNPDA1    | -3.22023 |          |          |          |
| CD3EAP    | -3.22076 |          |          |          |
| STRIP1    | -3.24008 |          |          |          |
| WBP2      |          |          |          | -3.24064 |
| RELA      |          |          |          | -3.24188 |
| YWHAE     |          |          | -3.2432  |          |
| VAMP2     | -3.24358 |          |          |          |
| VAMP3     | -3.24358 |          |          |          |
| GNB2L1    | -1.2349  |          | -2.01328 |          |
| SEC22B    |          | -3.27461 |          |          |
| MRPS6     | -1.58098 | -1.69447 |          |          |
| MCM4      |          |          |          | -3.27649 |
| KIAA0368  |          | -5.9256  | 2.645276 |          |
| TIMM22    |          | -1.01472 | -2.26711 |          |
| MRPS17    |          |          | -2.03559 | -1.24748 |
| TMEM165   | -3.28377 |          |          |          |
| ALDH16A1  |          |          |          | -3.28612 |
| CLN6      | -4.09617 |          | 4.162955 | -3.35753 |
| RAP1B     | -3.29739 |          |          |          |
| QPCTL     |          |          | -3.30868 |          |
| RPS5      |          |          |          | -3.3094  |
| ACTN2     |          |          | -3.32098 |          |
| SLIRP     |          |          | -3.32717 |          |
| RAD21     |          |          |          | -3.33092 |
| ITGB1     |          |          | -3.33129 |          |
| MLEC      |          | -1.03495 | -2.31137 |          |
| NDUFA13   |          |          |          | -3.34779 |
| GOT1      | -3.35792 |          |          |          |
| ACO2      |          |          |          | -3.35981 |
| HSP90B1   |          |          |          | -3.36368 |
| UTP14A    |          |          |          | -3.368   |
| GMPR2     |          |          |          | -3.36912 |
| AK2       | -3.37229 |          |          |          |
| ASNSD1    |          |          |          | -3.37668 |
| UBE2S     | -3.38723 |          |          |          |
| CWF19L1   |          |          | -3.39796 |          |
| S100A11   |          |          | -3.40122 |          |

|          |          |          |          |          |
|----------|----------|----------|----------|----------|
| LRRFIP1  |          |          | -3.41549 |          |
| COA4     |          |          |          | -3.42305 |
| OXA1L    |          | -3.42674 |          |          |
| CAST     |          |          |          | -3.43104 |
| CCAR1    | -1.81673 | -1.61559 |          |          |
| MRPL44   |          |          | -3.43332 |          |
| SNX6     |          |          |          | -3.43502 |
| AKR1E2   |          | -3.44747 |          |          |
| LSM6     |          | -3.45214 |          |          |
| MRPS26   |          |          | -3.45324 |          |
| DDX24    |          |          | -3.45925 |          |
| MYL6B    |          | -3.46164 |          |          |
| POLR1B   | 1.125633 | -4.594   |          |          |
| HNRNPA3  |          | -3.46885 |          |          |
| NDUFA7   |          | -3.4703  |          |          |
| KRT16    |          |          | -3.47708 |          |
| C9orf78  |          | -3.05708 | -2.35182 | 1.923778 |
| ACYP1    |          |          |          | -3.48797 |
| TBRG4    |          |          |          | -3.48968 |
| WARS2    |          |          |          | -3.50336 |
| CDK5RAP3 |          |          |          | -3.50359 |
| ZPR1     |          |          |          | -3.50776 |
| ZNF24    |          |          |          | -3.5127  |
| GSPT1    |          | -3.53017 |          |          |
| KRT17    |          |          |          | -3.53999 |
| YTHDC2   |          |          | -3.54384 |          |
| ZBTB33   |          |          |          | -3.54901 |
| CSTF2T   |          |          | -3.555   |          |
| TRIM25   |          | -3.55862 |          |          |
| SUMO4    |          | -3.56917 |          |          |
| PRPS1L1  | -3.57737 |          |          |          |
| EIF1AD   |          | -3.58561 |          |          |
| RPS11    | 2.593197 | -4.09635 | 1.507423 | -3.59124 |
| RBBP6    |          |          | -3.59617 |          |
| PRMT3    |          | -3.61031 |          |          |
| ZNF326   | -1.97816 | -1.64671 |          |          |
| SCAMP3   |          |          | -3.62602 |          |
| RPN1     |          |          | -3.62885 |          |
| AMPD2    | 1.779243 |          | -5.41338 |          |
| DIS3     |          | -1.90975 | -1.72691 |          |
| HOXA13   |          |          |          | -3.64491 |
| HOXC13   |          |          |          | -3.64491 |
| ITPR3    |          | -3.6474  |          |          |
| EXOSC5   |          |          | -1.32081 | -2.33523 |
| TXLNG    |          |          | -3.66183 |          |
| ABCB7    |          | -3.67124 |          |          |



|          |          |          |          |          |          |
|----------|----------|----------|----------|----------|----------|
| KCTD15   |          | -3.6785  |          |          |          |
| MLLT4    | -1.41889 | -1.13276 |          |          | -1.13229 |
| NRD1     |          | -3.68804 |          |          |          |
| MRPL38   |          | -3.69609 |          |          |          |
| ARCN1    |          | -3.69972 |          |          |          |
| POLR2E   | -2.66165 |          |          | 2.457537 | -3.49717 |
| DNM2     | -3.70972 |          |          |          |          |
| HECTD3   |          |          |          |          | -3.72409 |
| UBQLN4   |          | -3.72751 |          |          |          |
| AK6      | -1.82588 |          | -1.90312 |          |          |
| TAF9     | -1.82588 |          | -1.90312 |          |          |
| TAF9B    | -1.82588 |          | -1.90312 |          |          |
| FAM208A  |          | -3.74553 |          |          |          |
| SGTA     |          |          | -3.75919 |          |          |
| EMC6     |          | -3.76712 |          |          |          |
| TCEA2    |          | -3.77435 |          |          |          |
| MAD2L1   |          |          |          | -3.78417 |          |
| RPS6KA3  |          |          |          |          | -3.79231 |
| ATP5E    |          | -3.79663 |          |          |          |
| ATP5EP2  |          | -3.79663 |          |          |          |
| SRRM2    | 1.516944 | -3.3061  | -2.31777 | -1.85505 | 2.162365 |
| SMCHD1   |          | -3.80584 |          |          |          |
| POLR3E   | -1.74436 |          | -2.06153 |          |          |
| TRIP12   |          |          | -2.17492 | -1.6313  |          |
| PGAM2    |          | -3.80782 |          |          |          |
| NSMCE2   |          |          |          |          | -3.80838 |
| EIF2AK2  |          |          |          |          | -3.80849 |
| DHFR     |          |          |          |          | -3.80918 |
| ASPSCR1  |          |          |          | -3.80926 |          |
| PRPF4    |          |          |          | -3.8113  |          |
| KIAA1143 |          | -3.81667 |          |          |          |
| INA      | -1.65838 |          |          | -2.16121 |          |
| PSMA6    |          | 1.333539 | -2.72663 | -2.43483 |          |
| NME4     |          |          |          | -3.85053 |          |
| RPTOR    |          |          |          | -3.85209 |          |
| DDX6     | -2.09014 |          | -1.7732  |          |          |
| IKBIP    | -3.87843 |          |          |          |          |
| FASN     |          |          |          |          | -3.89296 |
| KPNA5    |          | -3.89825 |          |          |          |
| RANBP2   |          | -3.90072 |          |          |          |
| NEMF     |          | -3.90486 |          |          |          |
| ELAVL2   |          | -3.90543 |          |          |          |
| ELAVL4   |          | -3.90543 |          |          |          |
| AARSD1   |          | -3.91463 |          |          |          |
| RBM10    |          |          |          |          | -3.92664 |
| FAF2     | -2.50296 |          | -1.42749 |          |          |

|          |          |          |          |          |          |
|----------|----------|----------|----------|----------|----------|
| PARN     |          |          |          | -3.93113 |          |
| ADCK3    |          |          |          |          | -3.94006 |
| SYNCRIP  | -2.19762 | -1.743   |          |          |          |
| CNDP2    |          |          | -3.95345 |          |          |
| PPT1     |          |          |          |          | -3.96962 |
| DNAJC10  | 2.077288 | -4.30739 | 2.212304 | -3.96035 |          |
| GMPPB    |          | -4.00627 |          |          |          |
| PPM1A    |          | -4.01172 |          |          |          |
| PPM1B    |          | -4.01172 |          |          |          |
| PPID     | 1.547211 |          | -5.55908 |          |          |
| NCAPG    |          | -4.03302 |          |          |          |
| APOOL    |          | -4.0333  |          |          |          |
| TOMM70A  | -4.03567 |          |          |          |          |
| MEAF6    |          |          | -4.03853 |          |          |
| EXOC4    |          |          |          | -4.05024 |          |
| CLUH     |          |          |          | -4.05892 |          |
| TUFM     |          | -4.06347 |          |          |          |
| ATP1A4   |          |          |          |          | -4.06888 |
| TAF6     |          |          | -2.12199 | -1.94796 |          |
| CIRBP    | -1.68602 |          | -2.3889  |          |          |
| CDC20    | -4.07679 |          |          |          |          |
| ISYNA1   |          | -4.08311 |          |          |          |
| NCAPH2   | -1.83997 |          | -2.2595  |          |          |
| DDX50    | -4.15282 |          |          |          |          |
| KRR1     |          | -4.15838 |          |          |          |
| CNN3     | 2.500506 | -3.57681 | 2.009336 | -2.25604 | -2.83736 |
| PSMB6    |          | -4.16094 |          |          |          |
| SCAMP1   | -1.95537 |          | -2.21884 |          |          |
| PPA2     | -1.49032 | -1.38529 | -3.93064 | 3.95158  | -1.32398 |
| SLC25A14 |          |          |          | -4.18671 |          |
| PRKAR1A  |          |          | -4.19298 |          |          |
| SCAF8    |          |          |          | -4.19766 |          |
| ACAA1    | -1.47217 | -1.15649 | -1.57531 |          |          |
| TSFM     |          |          | -4.20755 |          |          |
| RIOK1    |          | -4.20914 |          |          |          |
| RPS7     |          | -4.20932 |          |          |          |
| KIF2A    |          |          |          | -4.21976 |          |
| CHMP4B   |          | -4.23058 |          |          |          |
| GLTSCR2  |          | -4.2403  |          |          |          |
| KRAS     |          | -4.24032 |          |          |          |
| CCDC43   |          | -4.24178 |          |          |          |
| PDCL     |          |          |          | -4.2444  |          |
| SUCLG2   |          |          |          |          | -4.24647 |
| RBBP5    | -1.63827 |          | -2.61193 |          |          |
| FBXO22   |          |          | -2.19836 | -2.0615  |          |
| DUSP9    | -4.26215 |          |          |          |          |

|          |          |          |          |          |          |
|----------|----------|----------|----------|----------|----------|
| CYB5A    |          | -2.33338 | -1.9424  |          |          |
| ALDH18A1 | -2.34246 |          | -1.93961 |          |          |
| RABGGTB  | -1.74383 |          |          |          | -2.54144 |
| MMAB     | -1.28051 |          | -3.01343 |          |          |
| BOP1     |          | -1.33159 | -2.96629 |          |          |
| RPL13    |          | -4.30034 |          |          |          |
| DYNC1H1  |          |          | -2.68134 | -1.62028 |          |
| EXOSC9   |          |          | -2.83629 |          | -1.47545 |
| NDUFA8   |          | -2.33454 |          | -1.9783  |          |
| OXSM     | -2.39439 |          |          | -1.95754 |          |
| VPS53    |          |          | -4.35441 |          |          |
| ALG5     |          |          |          | -4.35789 |          |
| UQCR10   | -2.00223 | -2.35803 |          |          |          |
| SLC25A11 | -1.86443 | -1.10765 |          |          | -1.39476 |
| UHRF2    |          | -4.36837 |          |          |          |
| UQCRFS1  |          | -2.07789 | -2.29524 |          |          |
| CTBP1    |          |          |          | -2.21661 | -2.15835 |
| CHRA1    | -1.27144 | -1.74736 | -1.36014 |          |          |
| MEN1     |          | -4.38629 |          |          |          |
| SBNO1    | -4.38726 |          |          |          |          |
| P4HA1    |          |          | -1.9399  | -2.46303 |          |
| MRPL55   |          |          |          |          | -4.40429 |
| MGME1    | -4.4175  |          |          |          |          |
| RAF1     |          |          |          | -2.20154 | -2.22375 |
| ECH1     | -2.39458 |          |          | -2.03307 |          |
| CMTR1    | -1.70667 |          | -2.72667 |          |          |
| WDR18    |          | -4.44914 |          |          |          |
| URB2     | -4.4795  |          |          |          |          |
| STMN1    | -1.9903  |          | -2.4957  |          |          |
| COPB2    |          |          | -1.98277 | -2.50439 |          |
| MRPL34   |          | -4.50409 |          |          |          |
| CHCHD1   | -3.36453 |          | -1.14543 |          |          |
| OSGEP    |          | -2.38376 |          | -2.12675 |          |
| LSM7     |          | -3.32069 | -1.19163 |          |          |
| HOXA5    |          | -4.53348 |          |          |          |
| AAMP     |          |          |          | -1.84889 | -2.69083 |
| JUP      |          |          | -1.78991 |          | -2.75553 |
| ENAH     | -4.71096 |          | 2.181123 | 2.764129 | -4.7803  |
| CLASP1   |          |          | -4.54792 |          |          |
| XPNPEP1  |          |          |          |          | -4.55798 |
| ALCAM    |          |          |          | -4.55926 |          |
| DVL2     | -2.15304 |          | -2.4129  |          |          |
| RPS29    |          |          |          |          | -4.57615 |
| DMAP1    |          | -4.58421 |          |          |          |
| GCN1L1   | -2.33777 |          | -2.24706 |          |          |
| ABCD3    |          | -2.26008 | -2.32592 |          |          |

|          |          |          |          |          |          |
|----------|----------|----------|----------|----------|----------|
| GALM     |          |          | -4.58792 |          |          |
| GAPDH    |          |          | -2.02558 | -2.56521 |          |
| THUMPD3  |          | -4.59677 |          |          |          |
| YWHAB    |          |          |          | -4.5992  |          |
| POLR2F   | 1.17413  |          |          | -2.9935  | -2.78556 |
| PPIG     | -4.60977 |          |          |          |          |
| DEGS1    |          |          |          |          | -4.61022 |
| RAP1GDS1 |          | -3.14529 | -1.46996 |          |          |
| ZMYND8   |          | -4.6335  |          |          |          |
| DCAF7    |          | -2.92246 |          | -1.71666 |          |
| KRT76    |          |          |          | -4.64438 |          |
| RABAC1   |          | -4.64624 |          |          |          |
| ARPC3    |          | -4.65029 |          |          |          |
| CHD1     |          | -4.65099 |          |          |          |
| DCAF16   |          |          |          | -4.65581 |          |
| POLR2G   |          |          |          | -2.07974 | -2.5859  |
| DDX18    | -1.51537 | -1.37748 |          | -1.79523 |          |
| KPNA3    |          | -4.6915  |          |          |          |
| KPNA4    |          | -4.6915  |          |          |          |
| USP14    |          |          | 2.570397 | -1.6973  | -5.56857 |
| KIF5A    |          | -4.6985  |          |          |          |
| KIF5C    |          | -4.6985  |          |          |          |
| TUBB4B   |          |          | -2.56464 | -2.13838 |          |
| CTH      |          | -4.71204 |          |          |          |
| KRT26    |          |          |          | -4.71562 |          |
| NDUFS7   | -4.72753 |          |          |          |          |
| CSNK1A1  |          |          |          | -2.59422 | -2.13942 |
| MYO1D    |          | -4.7727  |          |          |          |
| TEX10    |          | -4.7863  |          |          |          |
| ALB      | -2.73003 |          | -2.05899 |          |          |
| RABIF    |          |          |          | -2.46588 | -2.33451 |
| YBX3     | -2.74366 |          |          | -2.06569 |          |
| TOR1AIP1 |          |          |          |          | -4.8235  |
| HEBP1    |          |          | -4.84271 |          |          |
| RBM19    |          | -4.85682 |          |          |          |
| FAHD2A   | -2.2669  |          |          | -2.59539 |          |
| CDK9     | -2.35325 |          | -2.50953 |          |          |
| HOOK1    | -4.8726  |          |          |          |          |
| EXOSC10  | -4.87928 |          |          |          |          |
| GK       |          |          | -2.56566 | -2.31966 |          |
| GK3P     |          |          | -2.56566 | -2.31966 |          |
| KAT7     |          |          | -2.65347 | -2.23367 |          |
| PROSC    |          |          |          | -4.90439 |          |
| FAM3C    |          |          |          | -2.18272 | -2.73686 |
| MYEF2    |          |          |          |          | -4.92664 |
| SUMO1    |          |          |          | -2.3563  | -2.57072 |

|                   |          |          |          |          |          |
|-------------------|----------|----------|----------|----------|----------|
| DIAPH1            | -4.92733 |          |          |          |          |
| SYNGR1            | 1.763476 | -5.02074 | 2.398224 | -4.07627 |          |
| KLC1              |          | -4.93843 |          |          |          |
| DUS1L             |          |          | -4.94347 |          |          |
| WBP11             |          |          |          | -2.37605 | -2.56994 |
| GGCT              |          |          |          | -4.96207 |          |
| RBM14             | -2.04076 | -2.92151 |          |          |          |
| NSA2              |          |          | -4.9708  |          |          |
| EIF2B3            |          | -4.97185 |          |          |          |
| RTN1              | -3.29104 |          |          | -1.70514 |          |
| RPL35A            | -1.71821 | -2.52438 |          | 1.83632  | -2.59259 |
| ARFGAP1           |          |          |          | -2.38236 | -2.61909 |
| ZNF768            |          | -2.43029 |          | -2.57303 |          |
| MTPAP             | -5.01812 |          |          |          |          |
| ABCF1             |          |          |          | -2.50547 | -2.5132  |
| DNAJC7            |          |          | -1.8517  | -3.18239 |          |
| SLC25A4           |          |          |          | -2.4517  | -2.59165 |
| OCLN              |          | -5.05016 |          |          |          |
| TBL1X             |          |          | -5.05216 |          |          |
| TBL1XR1           |          |          | -5.05216 |          |          |
| TBL1Y             |          |          | -5.05216 |          |          |
| MCAT              |          |          | -5.05467 |          |          |
| RABL3             |          |          |          | -5.05571 |          |
| NFXL1             |          |          | -5.05917 |          |          |
| MTMR1             |          |          |          | -2.72771 | -2.3331  |
| PPIL1             |          |          |          | -2.60748 | -2.4619  |
| MAPK8IP3          |          |          | -5.07467 |          |          |
| PDS5A             | -5.08281 |          |          |          |          |
| MRPS28            |          |          |          |          | -5.08914 |
| SAAL1             | -2.53843 |          | -2.56563 |          |          |
| DVL3              |          |          | -5.13101 |          |          |
| NUCB1             | -3.13268 |          |          | -2.01113 |          |
| HIST2H2AC         |          | -5.15158 |          |          |          |
| ACTR3B            | -5.15805 |          |          |          |          |
| RAC2              | -5.16093 |          |          |          |          |
| MMTAG2            | -2.63378 | -2.57421 |          |          |          |
| AP2M1             | -3.19158 |          | -2.01803 |          |          |
| CORO1C            |          |          | -3.67221 | -1.56106 |          |
| HDDC2             |          |          | -5.23952 |          |          |
| KRT13             |          |          |          | -5.25169 |          |
| PAPOLA            |          |          | -5.26077 |          |          |
| ENY2              |          |          |          | -2.49698 | -2.76663 |
|                   | 36951    | -5.27676 |          |          |          |
|                   | 37316    | -5.27676 |          |          |          |
| CSNK2B-LY6G5B-562 |          | -2.74885 |          |          | -2.53074 |
| ABCC4             |          | -2.77553 |          | -2.51139 |          |

|               |          |          |          |          |          |
|---------------|----------|----------|----------|----------|----------|
| CDSN          |          |          | -5.28789 |          |          |
| RPL19         |          |          | -2.17058 | -3.13779 |          |
| GRK6          |          |          | -2.68347 |          | -2.63429 |
| RRS1          |          |          | -2.87846 | -2.44128 |          |
| CADM1         | -1.7068  |          | -3.61404 |          |          |
| DBT           | -2.00068 | -3.32128 |          |          |          |
| BMS1          | -2.85731 |          | -2.47589 |          |          |
| ATP6V1H       |          |          | -5.33967 |          |          |
| ANXA5         |          | -2.68438 |          | -2.65887 |          |
| NUP155        | -2.49249 | -2.87403 |          |          |          |
| PSMB3         |          |          | -2.98889 | -2.38387 |          |
| MORF4L2       |          | -2.55699 | -2.89121 | 2.684399 | -2.61222 |
| ACOT1         |          | -5.37735 |          |          |          |
| ACOT2         |          | -5.37735 |          |          |          |
| DDX52         |          | -2.32631 |          |          | -3.06498 |
| UROD          |          |          |          | -2.27214 | -3.12246 |
| CPD           |          | -2.70313 | -2.70265 |          |          |
| GPN1          |          | -2.66698 | -2.74539 |          |          |
| DKFZp566H1924 |          |          |          | -5.41626 |          |
| NPTN          |          |          |          | -5.41626 |          |
| TAGAP         |          |          |          | -5.42428 |          |
| RAB11A        |          |          | -5.42546 |          |          |
| MAP2K3        |          |          |          |          | -5.43039 |
| MAP2K6        |          |          |          |          | -5.43039 |
| IQGAP3        | 2.151935 |          | -4.20602 | 1.822634 | -5.21442 |
| ARHGDI1       |          |          |          |          | -5.44885 |
| PYGB          |          | -2.63965 |          | -2.81144 |          |
| ETFB          |          | -2.48834 | -2.96427 |          |          |
| C1orf158      |          |          | -5.48694 |          |          |
| DIDO1         |          |          | -2.9561  | -2.54441 |          |
| BCL2L13       |          | -3.32675 |          | -2.17674 |          |
| RPF2          |          | -3.24805 |          | -2.26113 |          |
| CPSF1         | -2.59122 |          |          | -2.92307 |          |
| CRELD2        |          | -5.51571 |          |          |          |
| FLII          | 3.42069  | -4.33417 |          |          | -4.6052  |
| ATAD3A        | -1.60541 | -1.15037 | -1.52031 |          | -1.24343 |
| ATP6V0C       | -2.73912 | -2.78425 |          |          |          |
| KIAA0101      |          |          | -5.53152 |          |          |
| BCAT2         |          |          | -1.80275 | -1.56661 | -2.16978 |
| SCML2         |          | -2.89512 |          |          | -2.65573 |
| LARP4B        |          |          | -5.5754  |          |          |
| ACLY          | -2.77196 |          | -2.80471 |          |          |
| SERF2         |          |          | -5.57885 |          |          |
| GPS1          | -5.58318 |          |          |          |          |
| PURA          |          |          | -5.59138 |          |          |
| FKBP4         |          | -3.53169 | -2.06061 |          |          |

|          |          |          |          |          |          |
|----------|----------|----------|----------|----------|----------|
| SLC39A7  |          | -2.48208 | -3.18378 |          |          |
| TNKS1BP1 | -5.6726  |          |          |          |          |
| KHDRBS3  | -2.3595  | -3.31358 |          |          |          |
| DUSP3    | -2.64822 |          |          |          | -3.02996 |
| ADI1     | -2.88167 | -2.80455 |          |          |          |
| EFTUD2   | -1.91489 |          |          | -1.63057 | -2.1464  |
| PLIN3    |          | -1.11877 | -1.985   | -2.60175 |          |
| TUBA1B   | 2.256509 | -3.84488 | 2.315176 | -3.32749 | -3.12603 |
| ATXN10   | -1.78596 |          | -1.99029 |          | -1.9654  |
| SCO2     | -3.28888 |          | -2.47276 |          |          |
| FN3KRP   |          |          |          | -5.77284 |          |
| TUBA1C   |          | -3.08797 |          | -2.68811 |          |
| PLCG1    |          | -7.96511 |          |          | 2.175216 |
| RUVBL1   |          |          | -2.66818 | -1.8059  | -1.33291 |
| NLE1     |          |          | -5.80896 |          |          |
| NFU1     |          | -5.81277 |          |          |          |
| ATAD5    |          |          | -5.81575 |          |          |
| SLC19A1  |          | -2.69573 | -3.12034 |          |          |
| CASC5    | -5.8261  |          |          |          |          |
| ARF1     |          |          | -2.69992 | -3.14567 |          |
| EHMT1    |          |          | -5.84813 |          |          |
| NCOA5    |          | -3.44026 |          |          | -2.40799 |
| SLC16A1  |          | -5.86328 |          |          |          |
| EPHA2    |          |          | -2.75417 | -3.11998 |          |
| KLC2     |          |          | -2.66411 |          | -3.23637 |
| RPL26    | -2.68106 |          | -3.22418 |          |          |
| BRD8     |          | -2.63529 | -3.27649 |          |          |
| HSPD1    |          | -2.79805 |          | -3.12388 |          |
| BAG2     |          |          | -2.93854 | -3.00946 |          |
| LARS     | -2.4397  |          | -3.51071 |          |          |
| DDX47    |          | -2.62691 |          |          | -3.32607 |
| RUVBL2   | -1.96323 |          |          |          | -3.99436 |
| C2orf47  | -5.96365 |          |          |          |          |
| TP53     |          | -3.89935 |          | -2.07043 |          |
| ARF6     |          |          | -2.56111 | -3.45671 |          |
| CHAF1A   |          | -3.21161 |          | -2.82699 |          |
| HMG3     |          |          |          | -2.61699 | -3.42233 |
| KDM2A    |          |          |          | -6.05091 |          |
| PGM2     |          |          | -3.7279  |          | -2.39205 |
| NPLOC4   | 2.237215 | -4.82177 |          | -6.45841 | 2.913432 |
| CTNNA1   |          |          | -1.98626 |          | -4.15357 |
| YBX1     |          |          |          | -4.12224 | -2.03098 |
| TMED2    |          |          |          |          | -6.16416 |
| SSU72    |          | -2.75194 | -3.4141  |          |          |
| CPT1A    | -2.18924 |          | -6.06365 |          | 2.078497 |
| SRPR     | -4.18327 |          | -1.99172 |          |          |

|         |          |          |          |          |          |
|---------|----------|----------|----------|----------|----------|
| IGF2BP3 | -1.62726 | -4.55308 |          |          |          |
| MANF    | -3.84208 |          | -2.3511  |          |          |
| TMEM33  |          |          | -6.21424 |          |          |
| RPS28   |          | -3.1099  |          | -3.11829 |          |
| TMEM230 |          |          |          | -3.00098 | -3.23006 |
| HOXB9   |          | -3.35205 | -4.52173 | 1.62912  |          |
| HSP90B1 |          | -4.18381 |          | -2.06155 |          |
| NOP2    |          |          | -1.54071 | -1.62757 | -3.07817 |
| DLD     |          | -6.25146 |          |          |          |
| WBP2    |          |          | -1.90798 | -2.27402 | -2.07031 |
| TBL3    | -1.54275 |          |          | -2.70846 | -2.00497 |
| GBF1    |          |          | -6.2616  |          |          |
| TIMM50  |          |          | -1.08509 |          | -5.17657 |
| FOXK1   |          | -6.27134 |          |          |          |
| PRPH    | -2.25491 |          | -2.13499 | -1.88298 |          |
| HNRNPD  |          | -3.11219 |          |          | -3.17615 |
| TIAL1   |          | -3.84441 |          |          | -2.45179 |
| H2AFY   |          | -3.15706 |          |          | -3.14491 |
| ACTN4   | -1.16988 | -2.51537 |          | -2.62115 |          |
| DDX3X   |          |          | -2.91939 |          | -3.43704 |
| PNP     |          |          | -2.10191 | -2.05808 | -2.19873 |
| MYDGF   | -2.06206 | -4.29725 |          |          |          |
| MRPL48  | -2.13757 |          | -1.9629  |          | -2.27709 |
| NUPL1   |          |          | -2.85985 | -3.51822 |          |
| STMN3   |          |          | -6.38517 |          |          |
| HMGCS1  |          | -1.30097 |          | -1.8795  | -3.21101 |
| VIM     | -1.98481 |          | -2.30395 | -2.10661 |          |
| CTDSPL2 | -1.75362 |          | -4.64741 |          |          |
| TMEM261 |          | -4.09466 | -2.30723 |          |          |
| COX7A2L | -2.06724 | -2.24255 |          |          | -2.1101  |
| NOMO2   | -1.6223  |          | -1.5839  | -3.21712 |          |
| SMC6    |          | -2.81204 | -3.61219 |          |          |
| RPS2    |          |          | -1.90566 | -2.55842 | -1.96352 |
| TRMU    |          |          |          | -4.04807 | -2.38451 |
| TXN2    |          | -2.421   | -1.84366 | -2.16848 |          |
| PSMC5   | -2.45609 | -3.97963 |          |          |          |
| CORO7   | -4.30313 |          | -2.1347  |          |          |
| TACC3   |          | -2.85518 |          | -3.59112 |          |
| IPO5    |          |          |          | -3.14492 | -3.30814 |
| HCCS    | -4.24395 |          | -2.21337 |          |          |
| FAM21A  |          |          |          | -3.17259 | -3.29602 |
| FAM21B  |          |          |          | -3.17259 | -3.29602 |
| FAM21C  |          |          |          | -3.17259 | -3.29602 |
| PRPF8   |          | -4.69843 | 4.342136 | -3.06528 | -3.05385 |
| PTRH2   |          |          | -3.38068 |          | -3.10879 |
| COX7A2  | -2.07222 | -2.21869 |          |          | -2.20402 |



|                |          |          |          |          |          |
|----------------|----------|----------|----------|----------|----------|
| SRSF11         | -2.75083 | -3.76632 |          |          |          |
| RFC5           |          | -5.41493 | -1.10643 |          |          |
| VPS25          | -1.66645 |          | -2.10018 |          | -2.76463 |
| DIEXF          |          | -1.37618 |          | -2.99869 | -2.15878 |
| WDR82          | -2.16014 | -4.37898 |          |          |          |
| TOP1MT         |          | -3.36225 |          | -3.1833  |          |
| TUBB2B         |          |          |          | -2.53882 | -4.01458 |
| C7orf55-LUC7L2 | -2.37358 |          |          | -2.05823 | -2.144   |
| UBQLN1         |          | -3.72751 |          | -1.72742 | -1.12263 |
| SRSF2          |          | -3.10301 |          |          | -3.48141 |
| SBNO2          | -4.16216 |          | -2.42691 |          |          |
| NIT1           |          |          | -1.2565  | -5.35202 |          |
| MTCH2          |          | -1.34063 | -1.57513 | -2.35446 | -1.38127 |
| SRRT           |          | -2.5251  | -1.86454 | -2.26863 |          |
| MRPL19         |          | -6.6586  |          |          |          |
| NOL7           |          |          | -2.00735 | -4.66555 |          |
| CMAS           | -3.20468 |          | -5.51455 | 2.044738 |          |
| PRMT5          | -3.6271  | -3.087   |          |          |          |
| LIN7B          |          | -3.58532 |          |          | -3.13237 |
| CSTF1          |          |          |          | -3.15913 | -3.56433 |
| CSRP2          | -3.19154 |          | -3.53224 |          |          |
| NAT10          | -2.25839 |          | -1.93023 | -2.54465 |          |
| ESYT1          | 6.467632 | -4.79004 |          | -4.37247 | -4.05334 |
| RBM27          |          |          |          | -2.6355  | -4.12646 |
| ACOT9          |          |          |          | -6.76808 |          |
| LTF            |          |          | -3.71124 |          | -3.06105 |
| UBE2G2         |          | -3.98902 |          | -2.78618 |          |
| SPAG9          |          |          |          | -3.06006 | -3.71783 |
| FKBP5          | -3.09271 |          | -3.69492 |          |          |
| CHD1L          | -3.81441 |          |          | -2.99114 |          |
| AGPAT9         |          |          |          | -2.41722 | -4.38844 |
| NELFE          |          |          |          | -3.10898 | -3.69972 |
| MRPS25         | -1.63374 | -2.49322 | -1.56416 |          | -1.12077 |
| KAT7           | -2.42405 |          |          | -4.39631 |          |
| SDE2           | -2.17183 |          | -4.65022 |          |          |
| MKLN1          | -4.30843 |          | -2.53646 |          |          |
| CLTB           |          | -3.12088 |          |          | -3.73507 |
| MRPS27         | -6.8674  |          |          |          |          |
| EXOC8          |          |          |          | -3.3176  | -3.55322 |
| LTV1           |          |          |          | -3.31905 | -3.55864 |
| PDS5A          |          | -4.70084 |          | -2.19316 |          |
| EEF1B2         | -4.87672 |          | 6.901283 | -3.02157 | -5.90591 |
| GHITM          |          | -2.25257 |          | -2.38453 | -2.2668  |
| UTP11L         | -2.48239 | -4.42287 |          |          |          |
| H3F3A          | -2.12328 | -2.23795 | 2.158461 | -4.71127 |          |
| KRT16          |          | -6.92303 |          |          |          |

|          |          |          |          |          |          |
|----------|----------|----------|----------|----------|----------|
| EIF5B    | -3.45535 | 1.418818 |          | -2.43152 | -2.47053 |
| DACH2    |          | -3.91386 |          |          | -3.03316 |
| BCAP31   | -2.26236 |          | -2.98617 |          | -1.7062  |
| ASH1L    |          |          | -2.69874 | -4.29071 |          |
| DCI      | -3.33854 |          |          |          | -3.67535 |
| GRN      | -1.93226 |          | -2.36509 | -2.72064 |          |
| TACO1    |          | -2.93617 |          | -4.08373 |          |
| ZKSCAN4  | -2.231   |          | -2.3353  | -2.45775 |          |
| UTP20    | -2.74654 |          | -2.08717 |          | -2.19909 |
| TROVE2   | 1.795647 | -4.14842 |          |          | -4.68103 |
| YLPM1    | -2.45473 | -5.40533 |          | 2.529958 | -1.71539 |
| XPO1     |          | -3.18305 |          | -3.86861 |          |
| AP2B1    | 2.388375 |          | -2.1287  | -3.24324 | -4.07281 |
| CMC2     | -2.21818 | -2.38715 |          |          | -2.47959 |
| MAP7D3   |          | -2.45673 |          | -2.35687 | -2.27601 |
| VTA1     | -2.055   | -2.33322 |          |          | -2.72539 |
| CALCOCO2 |          |          | -4.75649 |          | -2.37972 |
| WDR36    |          | -2.84368 |          | -4.30302 |          |
| SRSF8    |          | -3.61854 |          |          | -3.55126 |
| SUMF2    |          | -3.27645 | -2.25588 |          | -1.65465 |
| DACH1    |          | -4.01833 |          |          | -3.18506 |
| PWP1     |          | -2.4507  |          | -2.51245 | -2.24038 |
| SUCLA2   |          | -4.17274 |          |          | -3.03472 |
| THOC1    | -2.11149 | -2.8038  |          |          | -2.34316 |
| NDUFV1   | -2.99511 |          | -2.43244 | -1.84207 |          |
| AGPS     | 2.032368 | -2.50917 |          | -4.24536 | -2.55315 |
| LIG1     | -2.59695 |          | -2.63314 |          | -2.05609 |
| GRSF1    | -4.2567  |          | -3.05144 |          |          |
| PRRC2A   | -2.74735 | -2.85792 | -3.3375  | 1.633617 |          |
| CLNS1A   |          |          |          | -3.11551 | -4.20326 |
| SNRPB    | -3.8186  |          |          |          | -3.5004  |
| SNRPN    | -3.8186  |          |          |          | -3.5004  |
| UQCRH    | -1.45192 | -1.17514 |          | -4.70018 |          |
| DNTTIP2  |          | -2.92574 | -3.17887 |          | -1.24395 |
| PPARGC1A | 2.486487 |          |          |          | -9.84385 |
| LCP1     | -4.06945 | -3.29955 |          |          |          |
| FOXC2    |          | -2.31858 |          | -2.20095 | -2.85316 |
| FOXG1    |          | -2.31858 |          | -2.20095 | -2.85316 |
| FOXL1    |          | -2.31858 |          | -2.20095 | -2.85316 |
| BAG3     |          | -4.13331 |          |          | -3.24052 |
| RTN4     |          | -3.42722 |          |          | -3.94734 |
| KIF4B    | -1.99927 |          |          | -2.58796 | -2.82035 |
| DRG1     |          |          |          | -5.52718 | -1.88224 |
| EIF3F    | -1.62669 | -1.40272 | -2.57647 | -1.80361 |          |
| TTBK1    | -2.24854 |          | -2.73219 |          | -2.4291  |
| FKBP10   |          |          | -3.55708 | -2.18462 | -1.69113 |

|              |          |          |          |          |          |
|--------------|----------|----------|----------|----------|----------|
| AIP          |          |          |          | -3.45806 | -3.97713 |
| GLRX5        | -2.24875 |          | -3.2112  |          | -1.9961  |
| WDR44        |          |          |          | -3.24214 | -4.26653 |
| ATP6AP2      | -2.33239 | -2.67079 |          |          | -2.53825 |
| MT-ATP6      |          |          |          | -2.29688 | -5.24547 |
| WDR41        |          | -4.086   |          | -3.47256 |          |
| SMARCA4      | -1.60746 |          | -2.73311 | -3.22152 |          |
| SNX5         | -2.37434 |          | -2.64313 | -2.55127 |          |
| ZC3H15       |          |          | -5.55858 |          | -2.01177 |
| C4orf27      |          |          | -4.1438  |          | -3.43672 |
| ATP5O        |          |          | -1.95751 | -2.62852 | -2.99906 |
| MRPL1        |          | -4.31086 |          |          | -3.28206 |
| ITPA         |          |          |          | -3.45766 | -4.16155 |
| ABHD14B      |          |          |          | -3.10897 | -4.52472 |
| CAPN2        | -2.45855 |          | -2.77963 | -2.39984 |          |
| CELF1        |          | -2.73911 |          | -2.27341 | -2.6276  |
| UBE2O        | -2.0075  |          | -5.63428 |          |          |
| RPS26P11     |          | -4.21254 |          |          | -3.43205 |
| ECI1         | -3.65732 |          |          |          | -3.99413 |
| NDUFV2       | -1.26997 | -1.36095 |          | -2.57023 | -2.45188 |
| PRPF19       |          | -3.04747 | -2.13839 | -2.46801 |          |
| WDR33        |          | -4.14479 | -3.50948 |          |          |
| RPS26        |          | -4.21254 |          |          | -3.44696 |
| RPL36A       | -5.04617 | -4.42927 | -4.07364 | 1.932089 | 3.95545  |
| SLC25A3      | -1.82749 | -1.57369 | -4.26902 |          |          |
| ANKLE2       |          | -4.54385 |          | -3.13059 |          |
| SSRP1        |          | -7.67899 |          |          |          |
| STUB1        | -3.92477 | -3.73239 |          | 3.419912 | -3.46567 |
| UFD1L        |          |          | -4.36121 |          | -3.35071 |
| DKFZp434D199 | -2.7179  |          | -5.00503 |          |          |
| MDH2         |          | -4.8577  |          |          | -2.87118 |
| KRI1         |          |          |          | -4.63576 | -3.09851 |
| COX4I1       | -2.17487 | -2.96579 | -2.59582 |          |          |
| IMP3         |          | -3.68472 |          |          | -4.09142 |
| PAF1         |          | -4.00318 |          |          | -3.78314 |
| RAVER1       | 5.249719 | -2.94495 | -4.79086 |          | -5.30869 |
| PSMC6        |          | -4.99497 |          | -2.8007  |          |
| MYBBP1A      | -2.88105 |          | -3.26175 |          | -1.65342 |
| TMEM205      |          | -2.86064 |          | -2.63632 | -2.30021 |
| PPAN-P2RY11  |          |          |          | -4.7386  | -3.0722  |
| PNO1         |          | -3.02556 |          | -4.78687 |          |
| PML          |          | -2.82674 |          | -2.45596 | -2.53436 |
| SLC1A5       | -1.64313 |          | -3.6626  |          | -2.52232 |
| DES          | -2.06782 |          | -1.24522 | -2.38222 | -2.13424 |
| TARS2        | -2.33506 |          | -2.47315 |          | -3.02639 |
| COMMD6       | -2.03996 |          | -5.81204 |          |          |

|          |          |          |          |          |          |
|----------|----------|----------|----------|----------|----------|
| DYNC1I2  | -4.2873  |          |          | -3.56886 |          |
| COIL     |          | -4.41916 | -2.05517 | -3.48631 | 2.100155 |
| AP3B2    |          | -4.5168  |          |          | -3.34889 |
| ARFGAP3  |          | -2.69574 |          | -2.76914 | -2.41465 |
| SMARCD1  | -1.61602 |          | -1.92634 | -4.34978 |          |
| SPCS2    |          | -4.48593 |          | -3.41001 |          |
| KPNB1    |          |          |          |          | -7.89599 |
| ILF3     |          | -1.70511 |          | -4.70543 | -1.49148 |
| FTO      |          | -2.94594 |          | -2.62215 | -2.34294 |
| SPCS1    | -2.00694 |          |          |          | -5.90688 |
| SMPD4    |          | -4.50008 |          |          | -3.4164  |
| UBAP2    | -5.29387 |          | -4.57933 | 1.938873 |          |
| PHF5A    |          | -3.03547 |          |          | -4.90469 |
| CREBBP   |          |          | -5.27437 |          | -2.66661 |
| EP300    |          |          | -5.27437 |          | -2.66661 |
| GTPBP6   |          |          |          | -3.39885 | -4.54457 |
| RAB33B   |          | -2.92535 |          | -2.85588 | -2.16395 |
| RAB39A   |          | -2.92535 |          | -2.85588 | -2.16395 |
| RAB39B   |          | -2.92535 |          | -2.85588 | -2.16395 |
| RAB3A    |          | -2.92535 |          | -2.85588 | -2.16395 |
| RAB3C    |          | -2.92535 |          | -2.85588 | -2.16395 |
| TRIP4    |          | -2.74188 |          | -2.72748 | -2.49144 |
| TCEB2    |          | -3.51285 |          |          | -4.46867 |
| OSBP2    | -5.40918 |          |          |          | -2.57241 |
| PTRHD1   | -2.33547 |          | -1.9096  | -1.83947 | -1.90301 |
| ARL8B    |          | -4.10319 |          | -3.89402 |          |
| NCAPD2   |          | -4.82017 |          |          | -3.21349 |
| TIMM23   |          |          | -1.28665 | -6.76123 |          |
| TIMM23B  |          |          | -1.28665 | -6.76123 |          |
| SLC25A31 | -2.19658 |          | -2.91153 |          | -2.93997 |
| SLAIN1   |          |          |          | -3.95419 | -4.09425 |
| PTTG1IP  |          |          |          | -3.8285  | -4.23669 |
| CTAGE15  |          |          |          | -3.58782 | -4.47776 |
| CTAGE5   |          |          |          | -3.58782 | -4.47776 |
| CTAGE6   |          |          |          | -3.58782 | -4.47776 |
| GMFB     | -5.18809 |          |          | -2.90303 |          |
| NSUN5P1  |          | -2.62258 |          | -2.66368 | -2.81084 |
| NSUN5P2  |          | -2.62258 |          | -2.66368 | -2.81084 |
| DKC1     | -2.46678 | -2.63244 | -3.00273 |          |          |
| GPR180   |          | -4.13587 |          |          | -3.96937 |
| YWHAZ    |          |          |          | -4.42053 | -3.69965 |
| ATP5H    |          |          | -4.38387 | -3.7431  |          |
| GALNT2   |          | -4.19211 |          |          | -3.93557 |
| MAZ      | -2.14309 |          | -1.07808 | -3.19739 | -1.71643 |
| ZNF629   |          | -2.80244 |          | -2.8021  | -2.55906 |
| POLR3C   |          |          | -4.69821 | -3.46868 |          |

|           |          |          |          |          |          |
|-----------|----------|----------|----------|----------|----------|
| LIG3      |          | -2.98997 |          | -2.61098 | -2.57777 |
| HELLS     |          | -3.91615 | -4.28862 |          |          |
| DNAJB12   | -3.35783 |          | -4.88741 |          |          |
| APMAP     | -2.33044 |          | -3.81224 | -2.10491 |          |
| WDR43     |          | -3.42906 | -1.36443 |          | -3.47083 |
| SPTBN1    |          | -4.44553 |          |          | -3.82598 |
| SYMPK     | -6.37155 |          |          |          | -1.90478 |
| PBK       | -2.44687 |          |          | -2.77982 | -3.05143 |
| CDK12     |          |          | -2.66903 | -3.15126 | -2.47049 |
| PRPF3     | -1.64692 | -3.75091 | -5.24415 | 2.341057 |          |
| RECQL     |          | -4.32585 |          |          | -3.98184 |
| BLM       |          | -4.32585 |          |          | -3.98184 |
| RABGGTB   |          |          |          | -3.53706 | -4.7778  |
| SRP9      |          |          |          | -4.74538 | -3.58857 |
| NDUFC2    |          | -4.16122 |          |          | -4.18403 |
| CSNK2A2   |          | -3.70084 | -1.61239 |          | -3.04023 |
| MPHOSPH10 |          | -8.36237 |          |          |          |
| NPM3      |          | -2.73259 | -2.13896 | -3.50628 |          |
| RPS19BP1  |          | -4.11694 |          | -4.26478 |          |
| VHL       |          |          | -4.81411 |          | -3.66072 |
| PANK4     |          | -3.28267 | -2.30295 | -2.89746 |          |
| COX6C     | -2.81842 |          | -1.71594 |          | -3.96451 |
| BCKDHA    |          | -5.63313 |          |          | -2.87448 |
| BAZ1A     |          | -3.60975 |          | -2.43816 | -2.47076 |
| NUP62     |          | -3.2391  |          | -2.36404 | -2.92661 |
| CTR9      |          | -2.52744 | -3.58104 |          | -2.44747 |
| GUK1      |          | -4.49596 |          |          | -4.06162 |
| CTU1      |          |          | -4.31381 | -4.26613 |          |
| TRA2B     |          | -4.77632 | -3.81167 |          |          |
|           | 40787    | -4.17009 | -4.43311 |          |          |
| COX6A1    | -3.98046 | -4.65076 |          |          |          |
| UBXN4     |          | -2.81945 | -3.33139 |          | -2.49551 |
| AGO1      |          |          |          | -8.65215 |          |
| AGO2      |          |          |          | -8.65215 |          |
| SRSF7     |          |          | -1.13101 | -3.43668 | -4.08921 |
| ARHGAP17  |          |          |          | -4.34453 | -4.31711 |
| PSMD13    |          |          | -4.94403 | -3.72753 |          |
| DHX40     |          | -2.69857 |          | -6.00532 |          |
| U2AF1     | -4.24577 | -4.47581 |          |          |          |
| HSD17B10  | -3.29486 |          | -2.03831 |          | -3.39934 |
| HSP90B2P  | -4.07171 | -4.66243 |          |          |          |
| CCNB1     |          | -8.77883 |          |          |          |
| MAP2K2    |          | -4.05906 |          |          | -4.71988 |
| TSSC1     |          |          |          | -4.17522 | -4.60569 |
| SF3B1     |          | -4.23631 |          |          | -4.57216 |
| SETDB1    |          | -4.0699  | 1.727491 | -3.3368  | -3.14468 |

|          |          |          |          |          |          |
|----------|----------|----------|----------|----------|----------|
|          | 38961    | -3.35582 |          | -2.91379 | -2.56173 |
| THYN1    |          |          | -2.58107 | -3.2886  | -2.96259 |
| H3F3B    | -2.12328 | -2.23795 | 2.158461 | -4.71127 | -1.92272 |
| SCPEP1   |          | -3.89582 | -2.0222  | -2.919   |          |
| CBLL1    |          | -2.73404 |          | -3.92555 | -2.17972 |
| CYC1     | -2.15197 | -2.23469 |          | -1.92864 | -2.52988 |
| PPP6R3   | -4.66827 |          | -4.19324 |          |          |
| TMUB1    |          | -5.05682 |          | -3.82673 |          |
| MRPS14   |          |          | -2.12948 | -3.51832 | -3.25495 |
| AFF1     |          | -5.42578 |          |          | -3.48461 |
| SFXN4    | -4.25723 |          | -4.65462 |          |          |
| MTCH1    |          |          | -2.18375 | -3.48679 | -3.27149 |
| CDK9     |          | -4.87376 |          | -4.0882  |          |
| ANAPC5   | -4.38424 | -4.5823  |          |          |          |
| PZP      |          | -3.01686 |          | -3.52433 | -2.44594 |
| XRCC1    | -2.11136 | -3.29197 | -1.1455  | -2.49524 |          |
| GTF3C2   |          | -4.60952 |          | -4.45098 |          |
| TFIP11   |          | -3.01145 |          | -3.41337 | -2.65848 |
| ECI2     |          |          |          | -5.24312 | -3.87416 |
| OGT      |          | -4.92156 | -4.24194 |          |          |
| TES      |          |          |          | -3.89731 | -5.2811  |
| NEFH     | -2.87052 | -4.17303 |          |          | -2.16106 |
| NEFL     | -2.87052 | -4.17303 |          |          | -2.16106 |
| TRIAP1   |          | -4.18304 |          | -5.03002 |          |
| ATP5B    | -2.63928 |          | -4.45187 |          | -2.13315 |
| PYCR2    |          |          | -1.55106 | -4.66974 | -3.00706 |
| HBA1     | -2.50671 | -2.53685 |          | -1.56821 | -2.62687 |
| SEC23A   |          | -2.89402 | -3.63712 |          | -2.73867 |
| ADO      | -2.57567 |          | -2.82383 | -3.90859 |          |
| CAMK2D   | -5.1999  | -4.11135 |          |          |          |
| ECHS1    |          | -2.89894 |          | -3.86367 | -2.56153 |
| VDAC2    | -2.30841 | -2.82183 | -1.81102 |          | -2.38939 |
| NDUFA9   |          |          |          | -5.76442 | -3.57634 |
| SRPRB    |          | -4.15589 | -1.68789 |          | -3.50606 |
| WDR3     |          | -3.82924 |          | -3.03418 | -2.49719 |
| VAPB     |          | -3.53373 |          | -3.29584 | -2.54122 |
| ZC3H7A   |          | -4.89656 | -4.49299 |          |          |
| ZC3H7B   |          | -4.89656 | -4.49299 |          |          |
| VDAC1    | -2.53362 | -2.92457 | -1.78329 |          | -2.15886 |
| SOAT1    |          | -3.49965 | -3.48529 |          | -2.46681 |
| KLF12    |          | -4.98045 |          |          | -4.49282 |
| AP2A2    | -2.97922 | -3.48256 |          | -3.02029 |          |
| GPATCH11 |          |          |          |          | -9.49448 |
| CHP1     |          | -5.28051 | 2.296386 | -3.95732 | -2.56045 |
| RBM39    |          | -4.49496 | -3.17059 | -1.83783 |          |
| TNPO1    | -3.24849 | -3.65085 |          | -2.61968 |          |

|         |          |          |          |          |          |
|---------|----------|----------|----------|----------|----------|
| RAC2    |          | -5.57203 |          | -3.96436 |          |
| PRPF38B |          | -3.54769 |          | -3.40695 | -2.62022 |
| VEZF1   |          | -5.17099 |          |          | -4.41785 |
| MCM5    | -2.79547 |          | -2.34014 | -2.01653 | -2.44096 |
| BABAM1  |          |          | -5.48066 | -2.07425 | -2.06585 |
| USP39   |          | -4.78456 |          | -4.84904 |          |
| GMPPA   | -4.97451 |          |          | -4.66765 |          |
| CYP51A1 |          | -3.73038 |          | -5.96196 |          |
| CPVL    |          | -5.4424  |          |          | -4.2537  |
| HBA2    | -2.72749 | -2.92646 |          | -1.61603 | -2.4367  |
| LMAN2   | 1.141305 | -2.34893 | -2.28961 | -3.50628 | -2.70462 |
| PBRM1   | -4.78234 |          |          |          | -4.92936 |
| GLG1    | -1.89069 | -3.92503 | -3.916   |          |          |
| HM13    |          | -5.05068 |          |          | -4.69261 |
| MGST3   | -3.14725 | -2.9052  |          | -1.57709 | -2.11466 |
| MCCC2   | -3.11452 | -1.47809 | -3.21069 | -1.96365 |          |
| LIN7C   | -2.84649 | -3.059   |          |          | -3.89662 |
| PRKCSH  | -2.0408  | -2.62216 |          | -3.88253 | -1.26171 |
| TMA7    | -2.73546 |          |          | -3.1863  | -3.88632 |
| STT3B   |          | -3.58404 |          | -2.84638 | -3.39842 |
| MRPS2   |          | -3.96438 | -2.35695 |          | -3.52165 |
| DNAJC11 | -3.65274 | -3.00881 |          |          | -3.1818  |
| HINT2   | -1.64731 | -3.33558 | -4.86458 |          |          |
| RAE1    | -2.294   |          | -4.54597 | -3.01205 |          |
| PDS5B   | -2.29458 | -3.72636 | -3.83438 |          |          |
| PARK7   | -3.00919 | -3.22959 | -2.84157 | 1.811951 | -2.59614 |
| VPS36   |          | -3.10364 |          | -3.30757 | -3.46168 |
| SF3B3   |          |          |          | -4.62915 | -5.25897 |
| WIZ     | -6.98563 | -2.90547 |          |          |          |
| NQO2    | -4.66075 |          | -5.23061 |          |          |
| KHDRBS2 | -2.10822 |          |          | -4.77704 | -3.0101  |
| CUL2    | -5.26537 |          | -4.64689 |          |          |
| CHD1    | -4.99269 |          | -4.93317 |          |          |
| RBM15   |          | -3.47773 | -3.20078 |          | -3.26179 |
| SURF4   | -2.70421 | -3.35777 | -1.09424 | -2.81766 |          |
| TBC1D15 |          |          | -5.3761  | -4.60841 |          |
| NOSIP   |          | -3.3716  |          | -3.5572  | -3.06229 |
| HECTD1  | -4.53146 |          | -5.46885 |          |          |
| MAP1B   |          | -4.05975 |          | -1.73794 | -4.20494 |
| NCDN    | -4.05425 |          |          | -3.49103 | -2.48503 |
| CNBP    |          | -3.15136 | -2.31735 | -1.97395 | -2.58908 |
| PHIP    |          |          |          | -2.97956 | -7.05966 |
| UBR4    | -3.13122 | -2.40717 | -2.48306 | -2.02164 |          |
| ABCF1   | -5.11395 |          | -4.95057 |          |          |
| CANX    | -3.01042 | -4.67975 | -5.74233 |          | 3.360125 |
| RBM28   |          |          |          | -3.00508 | -7.07548 |

|             |          |          |          |          |          |
|-------------|----------|----------|----------|----------|----------|
| STAU1       |          | -3.48621 | -3.13367 |          | -3.4887  |
| HAUS5       |          |          | -5.00363 | -5.11961 |          |
| UTP14C      |          | -3.05368 |          | -4.04766 | -3.02347 |
| PMPCA       | -5.08401 |          | -5.04885 |          |          |
| SON         |          | -2.75123 | -1.91385 | -2.41511 | -3.08456 |
| SEC23B      | -4.18458 |          | -2.82511 | -3.16532 |          |
| HUWE1       | -5.18949 |          | -4.9915  |          |          |
| GLA         | -3.52324 |          | -4.1116  | -2.55036 |          |
| TMEM33      |          | -5.39322 |          | -4.82711 |          |
| RP2         |          | -4.73142 |          | -5.49054 |          |
| PPWD1       |          | -4.07591 |          | -3.85409 | -2.29802 |
| AP3S1       | -5.43045 |          |          | -4.81824 |          |
| RAB1C       | -5.91716 |          | -2.5459  | -1.79511 |          |
| EIF3L       |          | -3.27529 | -2.32363 | -4.66606 |          |
| BMI1        |          | -3.34419 |          | -3.53182 | -3.40366 |
| COMMD3-BMI1 |          | -3.34419 |          | -3.53182 | -3.40366 |
| CALU        |          | -6.45784 |          |          | -3.82231 |
| AHI1        | -4.09986 |          | -2.72808 | -3.48705 |          |
|             | 38412    | -5.51515 |          |          | -4.82794 |
| C21orf33    |          | -2.84652 |          | -4.76611 | -2.7338  |
| SRP54       | -2.7101  | -2.43348 | -2.65692 |          | -2.55618 |
| SLC25A22    | -4.37147 |          |          | -5.98652 |          |
| UBR7        |          | -4.24704 |          | -3.95849 | -2.16714 |
| CDCA8       |          |          | -5.2425  |          | -5.13705 |
| CHAMP1      | -2.23695 |          | -2.9058  | -2.21022 | -3.02848 |
| TXNRD2      | -2.67099 |          | -2.82549 | -2.3184  | -2.57116 |
| XPO6        |          | -3.04183 | -1.55413 | -3.58472 | -2.21336 |
| PPP2CB      | -3.02403 |          | -2.20384 | -2.32244 | -2.86148 |
| PTGES2      |          |          | -2.02908 | -3.66506 | -4.72322 |
| YWHAG       |          | -3.1595  |          | -3.39118 | -3.87865 |
| NAA40       | -5.09673 | -5.35421 |          |          |          |
| CCDC88A     | -1.92896 | -3.70426 | -4.82441 |          |          |
| ERP29       |          | -1.11872 | -2.98785 | -3.59091 | -2.76059 |
| NOMO1       | -2.18268 | -2.67801 | -3.19347 |          | -2.41687 |
| FAM175B     |          |          | -5.17507 | -2.74936 | -2.54773 |
| DCTN1       | -3.68118 |          | -2.08564 | -2.54467 | -2.16343 |
| DDX56       |          |          | -5.34119 | -5.17294 |          |
| RSL1D1      |          | -4.1026  |          | -3.17901 | -3.25101 |
| RRBP1       | -4.40824 |          |          | -2.38138 | -3.77629 |
| MRPL17      |          |          | -1.97804 | -3.95169 | -4.64126 |
| TOR1AIP2    | -2.49563 |          |          | -4.8882  | -3.19497 |
| FANCD2      | -4.39534 | -3.39663 |          | -2.78915 |          |
| LMNB2       | -2.59598 | -2.65637 |          | -1.89723 | -3.4507  |
| PTPN1       | -2.41264 |          | -6.11431 | -2.10032 |          |
| WBP2        | -5.15898 |          | -5.48695 |          |          |
| POLDIP3     | -2.49825 | -3.22718 |          | -2.60937 | -2.32863 |



|         |          |          |          |          |          |
|---------|----------|----------|----------|----------|----------|
| PPFIA1  | -4.48538 |          |          | -3.82195 | -2.36631 |
| OGFR    | -3.77385 |          |          | -3.68489 | -3.22563 |
| RRP1    | -1.81888 | -4.05443 | -4.83157 |          |          |
| SPC24   | -3.18572 |          | -2.63221 | -2.65616 | -2.26324 |
| PRRC2B  | -5.33384 |          | -5.41079 |          |          |
| IDH3G   |          |          |          | -6.39724 | -4.35597 |
| SLC1A5  |          | -5.35869 |          |          | -5.40056 |
| RPL34   |          | -3.90934 |          | -3.53235 | -3.33301 |
| PQBP1   |          | -3.5691  | -3.19545 | -4.01847 |          |
| QRSL1   |          | -4.83718 |          | -3.0823  | -2.87874 |
| SUMO2   |          | -3.91762 |          | -3.14314 | -3.74358 |
| SLC25A1 | -1.50294 | -5.60842 | -1.60133 |          | -2.09547 |
| MECP2   | -1.65892 | -2.9638  | -3.79068 |          | -2.40192 |
| DLST    | -2.48366 | -2.4251  | -2.5143  |          | -3.39986 |
| COPS3   |          | -5.48223 | -5.36776 |          |          |
| MPP2    |          | -3.76485 |          | -3.67235 | -3.44247 |
| TCOF1   | -1.45164 | -4.49974 |          |          | -4.93249 |
| GNAI2   |          | -3.16008 |          | -3.74314 | -3.99447 |
| RALY    | -2.60518 | -1.28507 | -3.12544 | -1.75179 | -2.13179 |
| STARD9  |          | -4.21639 |          | -3.06675 | -3.61982 |
| FAM136A | -2.05619 | -4.64206 | -1.89956 | 2.335816 | -4.64167 |
| CLIP1   | -5.52272 |          | -5.39031 |          |          |
| MRPL18  |          | -5.24861 |          | -5.67797 |          |
| POLB    |          | -7.79241 | -3.1356  |          |          |
| U2SURP  | -2.10316 | -2.99074 |          | -3.62931 | -2.23401 |
| TAMM41  |          | -3.36405 |          | -4.66698 | -2.93195 |
| GNG12   |          | -3.39531 | -3.44012 | -4.15533 |          |
| H2AFY2  |          | -3.33639 |          | -2.34605 | -5.30917 |
| TIA1    |          | -3.45806 |          | -3.12812 | -4.4088  |
| PEPD    |          | -2.76497 | -5.4764  |          | -2.75626 |
| EIF2D   | -5.40286 |          | -5.60344 |          |          |
| MORF4L2 | -1.70126 | -3.85077 | -5.46515 |          |          |
| POFUT1  |          |          |          | -5.75475 | -5.26284 |
| NDUFA10 | -3.24752 | -3.60031 |          |          | -4.17017 |
| RPL36   |          | -3.59391 |          | -4.2835  | -3.14444 |
| CHMP4A  | -5.48369 |          | -5.55014 |          |          |
| EEF1D   | -3.18076 | -4.22798 | -3.63028 |          |          |
| RHOT1   |          | -3.74272 |          | -7.31573 |          |
| MRPS18B | -2.90244 | -2.86728 |          | -2.89248 | -2.41458 |
| MAGT1   |          | -4.08106 |          | -3.27053 | -3.77396 |
| SAFB2   |          | -3.06912 | -4.60543 | -3.46055 |          |
| SNX17   |          | -2.58648 | -3.13903 | -2.83425 | -2.59391 |
| HK1     |          | -4.09056 |          | -3.54464 | -3.55586 |
| PNPT1   | 2.721037 | -5.0439  |          | -4.17426 | -4.70661 |
| TTC19   |          | -4.16135 | -2.49252 | -2.59786 | -1.96251 |
| NOL11   | -2.47084 | -3.26638 |          | -2.05178 | -3.49127 |

|         |          |          |          |          |          |
|---------|----------|----------|----------|----------|----------|
| MIA3    | -3.65132 | -2.27298 |          |          | -5.36818 |
| FSCN1   | -1.74446 | -2.76885 | -1.97186 | -2.95836 | -1.85797 |
| CSNK1E  |          | -3.78414 |          | -3.12889 | -4.39302 |
| DHRS7   | -2.28325 | -4.54783 |          | -2.20695 | -2.26981 |
| SAMM50  | -2.2448  | -2.26097 | -1.07063 | -3.56661 | -2.17178 |
| GOLGA2  | -2.7806  | -2.51629 | -2.91372 |          | -3.10505 |
| RPS15   |          | -4.31127 |          | -4.86189 | -2.14704 |
| ORC3    | -6.17445 | -5.20798 |          |          |          |
| PSAP    | -2.69631 |          | -3.71244 | -2.40718 | -2.56886 |
| RHOA    |          | -4.17416 |          | -3.13484 | -4.07863 |
| RHOC    |          | -4.17416 |          | -3.13484 | -4.07863 |
| HSPE1   | -4.14218 | -5.73122 | 1.111033 |          | -2.63475 |
| GNS     |          | -3.14873 | -2.4517  | -2.61484 | -3.19029 |
| PTMS    | -4.00092 |          |          | -3.7107  | -3.70088 |
| NIFK    | -4.20641 | -2.60795 | -3.10476 | 2.860583 | -4.37299 |
| MCMBP   | -2.62091 | -2.63354 | -3.32203 |          | -2.88382 |
| RAB11A  |          | -3.21053 |          | -5.04698 | -3.23679 |
| DNAJA2  | -2.16084 | -2.8405  | -3.11171 | -3.41109 |          |
| TAF15   | -1.11609 | -4.19254 |          | -2.22342 | -3.99674 |
| TIMM44  |          | -2.8853  |          | -4.98545 | -3.66437 |
| ZFP91   |          | -4.0916  | -3.78816 | -3.68301 |          |
| NOC3L   | -4.32896 |          | -3.1959  | -4.05198 |          |
| SNTB2   |          | -3.39082 | -1.19795 | -3.46232 | -3.55232 |
| RFC4    |          | -4.56736 |          | -3.41543 | -3.62315 |
| UFL1    | -4.8813  | -3.11457 |          |          | -3.62016 |
| ESYT2   | -4.70622 |          |          | -3.42465 | -3.49604 |
| CTNNA2  | -6.41266 |          | -2.42278 | -2.80351 |          |
| PRKAR2A | -4.4237  | -3.1157  | -4.10646 |          |          |
| GIN52   |          | -4.08285 |          | -3.3788  | -4.20023 |
| INTS7   | -4.39934 |          |          | -4.07894 | -3.1932  |
| FANCI   | -2.04489 | -3.39482 | -2.12464 | -1.93601 | -2.18894 |
| TEX264  |          | -5.50303 |          | -4.673   | -1.51501 |
| HMG1N1  | -3.5904  | -3.4589  | -5.82133 | 3.839661 | -2.69414 |
| CD2BP2  |          | -3.92739 |          | -3.43418 | -4.45231 |
| RPS4X   |          | -4.29997 |          | -3.34056 | -4.19123 |
| GPI     | -4.13662 | -3.30016 | -4.39904 |          |          |
| RPL23   |          | -4.35232 |          | -3.24746 | -4.25723 |
| RPL29   |          | -4.33445 |          | -3.28229 | -4.2508  |
| GPHN    | -5.13424 |          | -4.47534 |          | -2.26148 |
| RQCD1   | -2.60985 |          | -2.47862 | -3.42139 | -3.37351 |
| DDX54   |          | -4.23121 |          | -3.12502 | -4.52775 |
| ZNF330  | -4.89762 | -3.81254 |          | -3.17876 |          |
| NOL8    | -2.55287 | -2.71579 | -4.00582 |          | -2.62134 |
| ARFIP2  | -1.52336 | -4.24947 | -2.01632 | -1.80654 | -2.31031 |
| RAB25   |          | -4.57789 |          | -3.17212 | -4.15641 |
| NUP35   |          | -5.65169 |          | -6.26674 |          |

|          |          |          |          |          |          |
|----------|----------|----------|----------|----------|----------|
| CEBPZ    | -3.38903 | -4.01362 | -4.52096 |          |          |
| AMOTL1   |          | -3.46536 | -4.04102 |          | -4.42853 |
| P3H1     |          | -4.0658  |          | -3.24516 | -4.64703 |
| LEPRE1   |          | -4.0658  |          | -3.49117 | -4.41562 |
| C1orf177 |          |          |          | -6.14604 | -5.85764 |
| PSMD9    | -3.35861 |          | -3.03762 | -3.61609 | -1.99158 |
| PUM1     |          | -3.18742 |          | -4.8133  | -4.01103 |
| PUM2     |          | -3.18742 |          | -4.8133  | -4.01103 |
| NOP2     | -4.02532 | -3.99496 | -4.00229 |          |          |
| WNK1     |          | -4.37825 |          | -3.36277 | -4.29584 |
| PRPS1    | -4.5759  | -4.57822 |          |          | -2.88845 |
| YWHAQ    |          | -3.60965 |          | -4.08177 | -4.35623 |
| ALDH2    | -2.33637 | -4.41162 |          | -2.14713 | -3.17587 |
| SHMT2    | -2.19682 | -4.88627 | -2.4464  |          | -2.5612  |
| MARCKS   |          | -4.3254  |          | -3.57386 | -4.22823 |
| CD99     | -2.20646 | -4.33527 | -5.59922 |          |          |
| NAA40    |          | -3.06197 | -3.75137 |          | -5.33189 |
| COMMD2   | -4.68347 |          | -5.19203 |          | -2.27032 |
| ERGIC1   |          | -3.71089 |          | -4.85396 | -3.58105 |
| NIN      |          | -4.08223 |          | -3.45684 | -4.63058 |
| NUDT19   | -4.80841 |          | -3.96908 |          | -3.4135  |
| CYB5B    | -2.13833 | -6.36358 | -1.99823 | -1.69774 |          |
| KIAA1429 |          | -4.32936 |          | -3.8027  | -4.09367 |
| TTF2     |          | -4.62721 |          | -4.06148 | -3.55086 |
| GNL2     | -4.0141  | -4.31173 |          | -3.93002 |          |
| NUP98    |          | -5.01518 |          | -5.07406 | -2.18152 |
| ANXA11   | -4.83932 | -6.09241 |          | 3.679571 | -5.02165 |
| RCN2     | -2.22305 | -3.719   | -3.63816 |          | -2.73821 |
| PEX19    |          |          | -4.26432 | -3.47768 | -4.5816  |
| MPP6     |          | -4.22852 |          | -3.31354 | -4.81562 |
| TXNL1    | -2.86852 | -2.8697  | -3.61911 |          | -3.0023  |
| SCO1     |          | -3.83004 |          | -4.48657 | -4.05078 |
| RPS3     | -2.01822 | -2.55162 | -3.55774 | -1.56856 | -2.67984 |
| TMEM9    |          | -3.89816 |          | -3.98584 | -4.49315 |
| TMEM9B   |          | -3.89816 |          | -3.98584 | -4.49315 |
| REXO2    |          | -4.14807 |          | -3.63487 | -4.6216  |
| GFM1     |          | -3.92401 |          | -4.14499 | -4.35653 |
| PPT1     | -2.07039 | -3.74877 |          | -4.11602 | -2.5019  |
| NUP214   | -1.68229 | -4.20825 |          | -2.22845 | -4.42111 |
| LAMP1    | -3.93566 | -4.47683 | -4.13091 | -4.07177 | -4.80425 |
| EPS15L1  |          | -2.87605 | -7.09056 | -2.61561 |          |
| AP1M2    |          | -2.68188 | -6.72004 |          | -3.19183 |
| TSPAN6   | -3.15139 | -3.43666 | -2.16084 |          | -3.84898 |
| CSTF3    | -2.3532  | -2.50969 | -3.10436 | -2.30972 | -2.34044 |
| MINOS1   | -2.92028 | -3.00144 | -1.87482 | -1.84714 | -2.97948 |
| RRAS2    | 1.514699 |          | -4.79039 | -4.17827 | -5.17082 |

|            |          |          |          |          |          |
|------------|----------|----------|----------|----------|----------|
| TOMM40     | -3.06733 | -2.23684 | -4.87165 |          | -2.46254 |
| AKR1B15    |          | -4.68028 |          | -3.45482 | -4.53834 |
| PSMD4      | -4.45316 |          |          | -4.61839 | -3.62627 |
| TIMM9      | -2.7743  | -3.23198 | -1.96532 | -1.54536 | -3.19724 |
| MRPS28     |          | -5.12944 | -2.18607 | -2.68523 | -2.75681 |
| RCN1       |          | -5.86473 | -5.18567 | -1.7513  |          |
| NDUFA2     |          |          | -4.923   | -5.37595 | -2.54815 |
| MCCC2      | -4.84016 |          | -2.54862 |          | -5.47081 |
| SEC63      |          | -4.76043 |          | -3.75306 | -4.40971 |
| EEF1E1     |          | -6.86054 |          |          | -6.06483 |
| NDUFA6     |          |          |          | -6.66898 | -6.27734 |
| UQCRHL     |          | -2.44412 | -5.36534 | -5.14707 |          |
| BRD2       | -2.34625 | -2.28683 | -3.44393 | -1.57751 | -3.31565 |
| LMAN1      |          | -3.12265 | -7.43399 | -2.44027 |          |
| CHEK1      |          | -4.51662 | -4.10878 | -4.38117 |          |
| AMOTL2     |          | -4.54886 | -4.04102 |          | -4.42853 |
| SND1       | -2.71156 | -4.81229 | -5.49595 |          |          |
| USP5       | -4.23363 | -3.63461 | -5.16359 |          |          |
| CTCF       | -2.71075 | -4.8681  | -3.24057 | -2.21565 |          |
| MT1A       | -2.05102 |          | -5.83746 | -2.62587 | -2.52434 |
| MT1H       | -2.05102 |          | -5.83746 | -2.62587 | -2.52434 |
| HEATR6     |          | -3.60184 | -2.91466 | -3.18711 | -3.36476 |
| ATP1A1     | -2.03129 | -3.84389 | -1.60389 | -2.45889 | -3.18599 |
| NDUFAB1    | -5.81197 |          | -2.67535 | -2.03737 | -2.66465 |
| GOSR2      |          | -3.95512 | -1.65214 | -3.88284 | -3.72695 |
| HIST2H3A   |          | -6.64183 | -2.20666 | -4.39613 |          |
| EIF4G1     | -3.15117 | -3.32379 | -2.21606 | -2.20032 | -2.36824 |
| FARSA      |          | -2.86129 | -4.02699 | -4.1994  | -2.18969 |
| DHRS7B     | -4.58462 |          |          | -4.33758 | -4.38677 |
| LBR        | -4.26928 | -4.25659 |          | -2.06485 | -2.73026 |
| COX6B1     | -2.10898 | -4.96415 | -4.38356 | -1.8648  |          |
| PRPF31     | -2.02676 | -3.48579 |          | -3.39862 | -4.41143 |
| PAWR       | -4.58111 |          | -1.90414 | -3.30653 | -3.54287 |
| DHCR7      |          | -4.39681 |          | -4.15341 | -4.79363 |
| RUFY2      | -2.71467 | -4.60552 | -4.30194 | -1.72434 |          |
| WFS1       |          | -4.48343 | -1.96365 | -3.12814 | -3.78196 |
| GIN51      | -4.55183 | -4.85955 |          | -3.95648 |          |
| COPS7B     | -2.27656 | -3.36173 | -2.5223  | -2.48199 | -2.72831 |
| MRPL22     | -2.65908 | -3.29908 |          | -4.05526 | -3.36935 |
| UGGT1      | -5.11683 | -2.76358 | -3.05656 |          | -2.46279 |
| MRPL43     | 2.253248 | -5.66423 |          | -4.75568 | -5.23463 |
| AKAP12     |          | -4.41787 |          | -4.0751  | -4.91019 |
| HSPE1-MOB4 | -3.23368 | -4.0111  |          | -3.12631 | -3.05904 |
| GLOD4      | -4.39466 |          | -4.95115 |          | -4.09903 |
| HMG20A     |          | -4.67572 |          | -4.56977 | -4.19991 |
| MMS19      | -5.22148 |          | -5.76786 |          | -2.45932 |

|          |          |          |          |          |          |
|----------|----------|----------|----------|----------|----------|
| RABGGTA  | -4.68242 |          | -4.35548 | -4.43311 |          |
| UBA52    | -2.76689 | -2.88389 | -2.68362 | -5.14893 |          |
| DDA1     |          | -3.66045 | -4.0701  | -3.04059 | -2.7321  |
| ST13     |          | -4.1207  |          | -4.78378 | -4.63474 |
| HP1BP3   |          | -4.50836 | -3.14241 | -5.88943 |          |
| PSMD12   | -2.98997 | -2.80551 | -2.71074 | -2.4264  | -2.61373 |
| NDRG3    |          | -6.44112 | -4.13843 | -2.97375 |          |
| GNAI2    |          | -5.05678 |          | -3.81338 | -4.69627 |
| MRPL45   | -2.96006 | -4.72601 |          | -3.02012 | -2.8789  |
| MECR     |          | -4.9728  |          | -3.75859 | -4.87063 |
| OXCT1    |          | -4.63161 |          | -4.13724 | -4.86413 |
| ACSS1    |          | -5.01948 | -3.97647 |          | -4.68342 |
| KIAA0415 |          | -6.19186 |          | -3.64867 | -3.89251 |
| CLPX     |          | -4.63526 |          | -4.93575 | -4.20839 |
| NGDN     |          | -4.45889 |          | -4.68392 | -4.64443 |
| RNF2     | -2.33388 | -2.36074 | -3.28179 | -1.98143 | -3.86897 |
| SLC4A1AP | -2.93603 | -3.69995 |          | -3.00956 | -4.1833  |
| TFAP4    | -4.22933 | -5.57836 | -4.03547 |          |          |
| PPME1    | -2.64273 |          | -5.17564 | -2.53922 | -3.48733 |
| UGDH     |          | -5.01554 |          | -3.7477  | -5.08656 |
| SLC7A5   | -4.36013 |          | -2.18399 | -3.17012 | -4.14879 |
| TOMM22   | -2.28308 | -4.30146 | -2.08185 |          | -5.20308 |
| EIF4B    |          | -4.7178  |          | -4.38881 | -4.78759 |
| CALR     | -5.35053 | -2.69299 | -4.64149 | 2.936833 | -4.15868 |
| GAA      |          | -4.06222 | -2.74431 | -3.24698 | -3.85976 |
| MPI      | -5.76336 |          | -5.21043 | -2.96149 |          |
| MAX      |          | -4.74957 |          | -4.84326 | -4.35054 |
| EIF3K    |          | -4.64853 | -4.06543 | -2.74588 | -2.48863 |
| RFC5     | -5.43826 | -2.47188 |          | -2.7125  | -3.33095 |
| SUCLG1   |          | -3.46448 | -2.2409  | -3.96362 | -4.35338 |
| SAE1     | -2.19875 | -4.24549 | -4.93982 | -2.64291 |          |
| MMS19    |          | -4.49643 |          | -4.49933 | -5.03348 |
| ATP6V1C1 | -4.76679 | -3.36457 | -5.94906 |          |          |
| TIMM10   | -4.3286  | -3.09454 |          | -3.16109 | -3.49763 |
| UTP15    |          | -4.58118 | -4.53769 | -4.98248 |          |
| TRUB1    |          | -4.43838 |          | -4.2708  | -5.41943 |
| TIMM13   |          | -3.68461 |          | -4.36592 | -6.07823 |
| ARF4     |          | -3.89356 | -3.36684 | -3.37664 | -3.50419 |
| TLN1     | -3.63884 | -3.06067 | -3.12949 | -4.33643 |          |
| CKAP2    |          | -4.47804 | -3.02743 | -3.47532 | -3.19921 |
| CLPTM1   |          | -4.89544 |          | -4.36164 | -4.96857 |
| ANKFY1   | -4.80386 |          | -4.51406 | -4.91232 |          |
| TFRC     | -4.18854 | -5.57094 |          | -4.49902 |          |
| SERPINH1 |          | -4.26912 |          | -4.57537 | -5.41792 |
| TXNDC12  | -3.01486 | -6.43455 | -4.87861 |          |          |
| PTGES3   |          | -4.88916 |          | -4.39515 | -5.07585 |

|              |          |          |          |          |          |
|--------------|----------|----------|----------|----------|----------|
| RPA2         |          | -4.81456 |          | -4.22974 | -5.32955 |
| CHMP2B       |          | -5.13502 | -2.03458 | -3.13415 | -4.08104 |
| TPT1P8       | -4.77998 | -5.22209 | -4.39875 |          |          |
| LOC102724023 | -4.06112 | -2.84652 |          | -4.76611 | -2.7338  |
| ARMC6        | -3.44215 |          | -3.32637 | -2.76764 | -4.91041 |
| WDR26        | -3.12993 |          | -3.98745 | -3.7618  | -3.57455 |
| ARG1         |          | -3.17529 | -3.21918 | -2.7248  | -5.36024 |
| CDC42        | -2.32122 | -3.98768 | -1.93861 | -3.0633  | -3.18881 |
| SLC35A4      |          | -5.3384  |          | -4.1907  | -5.00722 |
| HGS          |          | -5.25833 | -4.68167 | -4.5978  |          |
| AIFM1        | -3.06203 | -5.37535 |          |          | -6.11288 |
| MRPS11       | -2.77407 |          | -2.97123 | -5.17664 | -3.66401 |
| M6PR         | -3.56131 |          | -3.51921 | -3.39562 | -4.16329 |
| RHOJ         | -5.16093 | -5.57203 |          | -3.96436 |          |
| RHOQ         | -5.16093 | -5.57203 |          | -3.96436 |          |
| SMARCD2      |          | -2.59053 | -4.82123 | -3.05095 | -4.23525 |
| DNAJC5       | -4.00914 |          | -4.0936  |          | -6.61822 |
| MRPS7        |          | -3.14333 | -3.63385 | -3.63196 | -4.34917 |
| MAVS         | -4.0558  | -5.39016 |          |          | -5.33162 |
| RBM34        | -3.8921  | -3.50372 | -2.50876 | -2.1255  | -2.74909 |
| ASNS         | -3.26016 | -3.08155 | -3.37231 | -2.27543 | -2.8064  |
| PUS7         | -5.16088 |          | -3.97028 | -5.66554 |          |
| PELP1        | -3.34478 | -4.07796 |          | -3.23482 | -4.15884 |
| NFKB1        | -2.38713 | -4.68233 | -3.24169 |          | -4.53294 |
| BCLAF1       |          | -4.0649  | -2.94167 | -3.36038 | -4.48002 |
| GABPB1       | -3.47805 | -3.35808 | -2.18386 | -2.48375 | -3.35332 |
| BRAT1        | -5.56477 |          | -4.48034 | -4.81625 |          |
| ACTN1        | -3.48866 | -2.7941  | -3.21103 | -2.44676 | -2.9254  |
| MSN          | -2.83167 | -3.36124 | -3.56515 | -2.47958 | -2.64647 |
| STIM2        | -1.77339 | -4.69229 |          | -3.65666 | -4.77094 |
| SUCLG2       | -3.55896 | -3.9432  | -5.67396 |          | -1.7967  |
| LIMD1        | -4.68498 |          | -5.08561 | -5.2122  |          |
| AHSG         | -5.48552 |          | -4.61205 | -4.88612 |          |
| HDAC3        |          | -4.78826 | -4.79266 | -2.79245 | -2.63155 |
| SAP18        | -1.76106 | -3.69719 | -4.28512 | -1.93191 | -3.35724 |
| RSF1         | -6.21257 | -3.85022 |          | -3.04494 | -1.94852 |
| NOLC1        | -1.35961 | -5.73305 | -3.15028 | -4.85054 |          |
| SRM          |          | -5.48838 | -2.14884 | -1.92881 | -5.55824 |
| BICD2        | -4.67942 |          | -5.56768 | -4.88815 |          |
|              | 39692    | -5.68145 | -4.49969 | -4.96534 |          |
| PEF1         | -4.96097 | -5.20455 | -4.98645 |          |          |
| ZNF512B      |          | -5.338   |          | -5.09391 | -4.76411 |
| NT5DC1       | -5.17546 |          | -5.34986 | -4.67206 |          |
| THUMPD3      | -5.17619 |          | -5.33398 | -4.71389 |          |
| GLMN         | -1.81899 | -4.22006 | -2.30759 | -4.64907 | -2.24806 |
| LIN28B       | -1.99355 | -4.2553  | -4.92341 |          | -4.07615 |

|              |          |          |          |          |          |
|--------------|----------|----------|----------|----------|----------|
| DDX39A       | -4.00151 | -4.30846 |          | -3.01825 | -3.94828 |
| GIGYF2       | -5.23002 |          | -5.59673 | -2.3379  | -2.16514 |
| UBE2M        | -4.24912 | -2.81917 | -4.09508 | -4.1678  |          |
| MRPS5        |          | -5.56579 |          | -4.61271 | -5.15872 |
| SKIV2L2      | -5.28725 |          |          | -4.69759 | -5.35572 |
| CRYZL1       | -5.3252  |          |          | -4.83561 | -5.18759 |
| SRP19        | -3.37202 | -3.93829 | -4.89042 |          | -3.15809 |
| PRCP         | -4.76167 |          | -3.354   | -2.67971 | -4.58639 |
| DKFZp586I031 | -4.15888 | -4.361   | -3.68584 |          | -3.20434 |
| NPM1         |          | -5.08287 | -2.22782 | -3.04395 | -5.05716 |
| RPL31        |          | -4.06908 | -4.00043 | -3.75689 | -3.62684 |
| ACTR3B       |          | -5.7271  |          | -4.39891 | -5.32881 |
| UQCRQ        | -2.11449 | -4.29262 | -4.67424 | -1.56468 | -2.81289 |
| GNB1         | -5.49391 | -4.09386 | -5.87767 |          |          |
| COMT         |          | -5.71595 |          | -4.57047 | -5.18447 |
| C1orf131     |          | -4.53457 | -4.21106 | -2.33745 | -4.39226 |
| RRP7A        | -4.3798  | -2.91847 | -4.43268 |          | -3.74879 |
| EIF2B4       | -5.3329  |          | -5.46787 | -4.70733 |          |
| CKMT1A       | -2.3101  | -5.85969 | -1.84    |          | -5.50847 |
| CKMT1B       | -2.3101  | -5.85969 | -1.84    |          | -5.50847 |
| OPA1         | -1.95731 | -2.98096 | -3.84387 | -1.4548  | -5.28601 |
| CKMT2        | -2.3101  | -5.85969 | -1.89499 |          | -5.50847 |
| DEK          | -3.77993 | -3.6507  | -3.95312 | -2.04949 | -2.14392 |
| GNG5         | -1.6705  | -3.51748 | -4.27021 | -4.84613 | -1.30281 |
| SACM1L       |          | -5.55736 |          | -4.73477 | -5.32369 |
| TKT          | -5.18734 | -4.78226 | -3.45294 | -2.20249 |          |
| H3F3A        |          | -6.76445 | -2.71014 | -4.24893 | -1.92272 |
| TIMM8B       | -3.98872 | -5.30694 | -6.35228 |          |          |
| TPM3         |          | -6.2907  | -4.55812 |          | -4.82147 |
| RBM22        | -2.14895 | -5.78662 |          | -2.1559  | -5.59411 |
| CCDC40       | -2.79399 |          | -4.36784 | -4.37256 | -4.16978 |
| YTHDF1       |          | -5.5768  |          | -4.77046 | -5.37453 |
| IST1         | -4.64282 | -3.30526 | -3.92534 | -3.8535  |          |
| PRPS2        | -4.44689 |          | -3.87921 | -3.26656 | -4.18426 |
| DNAJB2       | -6.03464 | -4.84711 |          | -2.38711 | -2.54064 |
| DNAJB8       | -6.03464 | -4.84711 |          | -2.38711 | -2.54064 |
| BTF3         | -5.36551 | -4.52325 | -2.23324 | -3.69326 |          |
| USP47        |          | -5.63435 |          | -4.90651 | -5.32244 |
| GFAP         | -2.64665 | -4.53738 | -3.99645 | -2.26319 | -2.4291  |
| DHX29        | -5.42581 |          | -5.41687 | -5.04615 |          |
| BZW1         | -5.1836  | -2.7509  | -5.3713  |          | -2.63846 |
| WHSC1        |          | -5.16936 | -5.41773 |          | -5.36385 |
| SNW1         | -5.55327 | -5.64928 |          | -4.80456 |          |
| PRPSAP1      | -5.64579 | -3.71109 | -3.31804 | -4.55715 | 1.221887 |
| TBC1D10A     | -5.22328 |          | -5.20582 | -5.58217 |          |
| ERP44        | -2.89223 | -3.31769 | -4.16772 | -5.64274 |          |

|               |          |          |          |          |          |
|---------------|----------|----------|----------|----------|----------|
| ARF3          |          | -4.22191 | -3.54668 | -4.73116 | -3.53436 |
| TMEM14C       |          | -3.58827 | -5.22974 | -7.21915 |          |
| LONP1         | -3.83915 | -2.86443 | -4.1874  | -2.54906 | -2.61854 |
| SNRPB2        |          | -4.62129 | -4.71635 | -2.01677 | -4.7376  |
| DKFZp434B2017 |          | -4.14403 | -6.64535 | -2.69994 | -2.61401 |
| EPPK1         | -5.4896  | -3.04698 | -4.88533 | -2.70167 |          |
| GEMIN4        | -5.29151 | -5.54959 | -5.2825  |          |          |
| MAEA          | -6.3216  |          | -5.08716 | -4.72551 |          |
| VASP          |          | -5.70242 | -5.6392  | -4.8337  |          |
| LCMT1         | -5.21382 |          | -5.56951 | -5.42072 |          |
| TRIP6         | -4.20755 | -4.24489 | -4.03938 | -3.7342  |          |
| SAR1B         |          | -4.30769 | -6.64535 | -2.69994 | -2.61401 |
| TBCA          | -4.20508 | -4.52328 | -2.27609 | -2.49885 | -2.86716 |
| ARKL1         | -4.97984 |          | -5.85681 | -5.53419 |          |
| C18orf25      | -4.97984 |          | -5.85681 | -5.53419 |          |
| TMEM43        |          | -5.33729 | -4.5333  | -2.50588 | -4.02813 |
| RBMX          | -5.33708 | -2.61962 | -5.25035 |          | -3.21317 |
| SCRN1         | -4.59368 | -4.2047  | -3.76325 | -3.87301 |          |
| MRPL12        | -2.38675 | -3.73615 | -2.8855  | -5.06965 | -2.40367 |
| TUBB3         | -4.73396 | -7.05714 | -4.78903 |          |          |
| RPE           | -3.28054 | -3.64313 | -3.82479 | -2.60527 | -3.23376 |
| CHMP2A        |          |          | -8.38675 | -5.12912 | -3.0744  |
| COASY         |          | -4.06602 | -4.54123 | -3.46803 | -4.55141 |
| VDAC3         | -4.53121 | -5.48841 | -1.49345 |          | -5.14844 |
| MT1X          | -2.9782  | -2.78665 | -5.79498 | -2.85535 | -2.26362 |
| MT2A          | -2.9782  | -2.78665 | -5.79498 | -2.85535 | -2.26362 |
| CD63          | -3.44268 | -3.69317 | -3.23669 | -2.8397  | -3.47028 |
| ASF1B         | -3.65531 | -3.21335 | -3.26664 | -3.81284 | -2.7483  |
| DPP9          |          | -4.628   | -4.66818 | -3.3206  | -4.09365 |
| SOD2          | -5.91184 |          | -3.26194 | -5.34618 | -2.19625 |
| FAH           |          | -5.1045  | -4.88911 | -3.01662 | -3.75371 |
| DAD1          | -2.12371 | -4.53747 |          | -5.35563 | -4.79011 |
| SCP2          | -4.91417 | -2.95046 | -2.49781 | -3.12866 | -3.32114 |
| NKAPL         | -4.29071 | -4.88678 | -4.20526 | -3.46807 |          |
| NDUFB6        | -5.42338 | -5.46366 |          |          | -5.98308 |
| SRA1          | -4.82263 |          | -7.28302 | -4.76655 |          |
| RDH13         | -3.98578 |          | -4.49534 | -4.0922  | -4.31779 |
| LDHC          |          | -4.32451 | -4.04382 | -3.8309  | -4.71956 |
| MT1G          | -2.9782  | -2.78665 | -5.79498 | -2.85535 | -2.52434 |
| CBS           | -5.30031 | -4.80775 |          |          | -6.83911 |
| RCCD1         | -5.78196 |          | -5.71506 | -5.51246 |          |
| VAR5          | -5.93881 | -4.2199  | -4.83735 |          | -2.02383 |
| TARDBP        | -4.3339  | -4.24187 | -4.27821 |          | -4.18102 |
| SBDS          | -4.29414 | -4.84746 | -4.18501 | -3.72805 |          |
| GFPT2         | -3.50895 | -4.38267 | -2.97668 | -2.79141 | -3.40927 |
| DACH2         |          | -3.80242 | -5.92202 | -3.71579 | -3.65165 |



|            |          |          |          |          |          |
|------------|----------|----------|----------|----------|----------|
| ELP2       |          | -5.4057  | -5.79084 | -5.932   |          |
| MTA3       | -6.1469  | -3.67048 |          | -3.38313 | -3.92985 |
| SLC9A3R2   | -4.40207 | -4.60387 |          | -4.32164 | -3.81287 |
| ME3        | -2.76386 | -5.64892 | -3.08055 | -2.54698 | -3.14328 |
| METAP1     | -4.06419 | -4.45492 | -2.49851 | -3.25451 | -2.91982 |
| CPSF7      |          | -5.77997 | -4.6965  | -4.5391  | -2.20088 |
| SUB1       | -5.39265 | -3.46832 | -5.5043  |          | -2.87185 |
| HNRNPH1    |          | -8.77373 |          |          | -8.47423 |
| HRNR       | -1.71872 | -4.44977 | -3.99967 | -2.31803 | -4.81883 |
| MTDH       |          | -4.74009 | -3.86663 | -3.49204 | -5.22578 |
| POR        | -1.81961 | -3.25148 | -3.92775 | -3.72029 | -4.60571 |
| SMN2       |          | -4.68197 | -5.42319 | -3.89829 | -3.36153 |
| HMOX1      |          | -5.7123  | -2.73206 | -4.51003 | -4.48586 |
| CLTA       | -5.15511 | -5.30729 | -2.45955 | -4.54192 |          |
| UTS2       | -4.86828 | -4.74526 |          | -3.31108 | -4.57745 |
| BAX        | -3.32021 | -3.99552 | -2.55488 | -3.41644 | -4.22591 |
| ACADM      | -4.719   |          | -5.41325 | -2.90126 | -4.52815 |
| EZH2       | -2.5748  | -4.89205 | -4.01851 | -6.07954 |          |
| C11orf98   | -4.09917 | -4.16106 |          | -4.73401 | -4.58209 |
| CPNE1      | -5.57377 | -3.72216 | -5.46115 |          | -2.86431 |
| PTMA       | -1.395   | -5.75057 | -5.44764 | -5.03521 |          |
| RRP12      | -5.36632 | -3.05996 | -4.28759 | -2.77763 | -2.16175 |
| SLC25A24   | -9.53643 | -5.10331 | 3.690906 | -4.55124 | -2.16841 |
| UQCRRFS1P1 |          | -5.66671 | -2.21142 | -4.53859 | -5.26609 |
| RANBP9     | -6.40128 |          | -1.94245 | -4.73833 | -4.60493 |
| DBN1       | -1.28424 | -5.11847 | -2.24577 | -4.05272 | -5.01118 |
| ASMTL      | -5.75089 |          | -6.92835 |          | -5.04693 |
| RUFY1      |          | -4.60552 | -1.68794 | -4.88068 | -6.5686  |
| RUFY3      |          | -4.60552 | -1.68794 | -4.88068 | -6.5686  |
| SMN1       |          | -4.68197 | -5.42319 | -3.89829 | -3.79806 |
| ZMYM3      | -2.01258 | -7.44503 | -3.11302 | -2.37103 | -2.87086 |
| ATPIF1     | -2.46938 | -5.39197 |          | -4.93296 | -5.06111 |
| TSC2       |          | -4.64575 | -3.29363 | -4.72018 | -5.23535 |
| DCAF16     | -5.52875 | -2.60806 | -4.54073 | -3.0766  | -2.1851  |
| RPL36AL    | -5.08422 | -5.67877 | -2.21485 | -4.96381 |          |
| RPL8       | -4.67955 | -4.84678 | -4.26895 | -4.20286 |          |
| MCM4       | -2.25471 | -5.59441 | -5.47762 | -2.07439 | -2.6051  |
| CEP41      | -4.30699 | -5.141   | -2.31975 | -1.81595 | -4.42394 |
| MRPS9      |          | -3.85657 | -5.63076 | -3.95807 | -4.58373 |
| RAB1B      | -4.18665 | -4.65953 | -2.18092 | -5.01685 | -2.09605 |
| NCL        | -5.1951  | -4.88912 | -2.94944 |          | -5.13221 |
| GLS        | -3.29643 | -2.92437 | -3.29424 | -4.94899 | -3.70304 |
| ARL2BP     | -4.18843 | -4.7356  | -4.28252 |          | -4.99929 |
| RPS23      | -4.84824 | -5.02267 | -3.05825 | -2.07181 | -3.22179 |
| CHMP1A     |          | -4.42856 | -4.27688 | -4.70928 | -4.82755 |
| BZW2       | -5.19822 | -3.51046 | -3.67222 | -3.30828 | -2.56986 |

|              |          |          |          |          |          |
|--------------|----------|----------|----------|----------|----------|
| MEPCE        |          | -5.42665 | -5.49277 | -4.63997 | -2.70672 |
| LPCAT1       | -4.15719 |          | -4.33641 | -4.55881 | -5.23647 |
| SDAD1        | -4.46135 | -4.25271 |          | -5.14734 | -4.45345 |
| DKFZp434B156 | -4.5162  | -4.63979 | -4.4711  |          | -4.71204 |
| WDR92        | -4.5162  | -4.63979 | -4.4711  |          | -4.71204 |
| MDN1         | -2.56547 | -4.54175 | -3.78285 | -3.27771 | -4.18968 |
| OCIAD1       |          | -2.57664 | -4.65574 | -6.09395 | -5.08529 |
| TPP2         |          | -4.98151 | -4.10636 | -4.91478 | -4.48483 |
| HYPK         | -3.71704 | -4.22669 | -4.34784 | -2.91311 | -3.29858 |
| PRPF40A      | -1.68373 | -5.18964 | -1.96283 | -4.61975 | -5.10291 |
| FTH1         | -5.75942 | -5.22908 |          | -2.72126 | -4.86123 |
| KPNB1        | -3.16513 | -8.46766 |          | -3.0591  | -3.90285 |
| IMMT         | -1.36714 | -5.81508 | -1.31111 | -5.04069 | -5.14899 |
| PPP1CB       | -4.02021 | -3.71616 | -4.05608 | -3.04163 | -3.94469 |
| DDI2         | -5.39539 | -3.08091 | -5.28125 | -2.02811 | -3.08391 |
| SF1          | -2.05474 | -5.22209 | -2.19975 | -4.36768 | -5.07027 |
| TSFM         | -7.0763  |          | -7.48703 | -4.38379 |          |
| CNN2         | -6.17768 |          | -5.64357 | -3.18052 | -3.95121 |
| APOBEC3C     | -4.1035  | -4.30468 | -3.84372 | -3.01634 | -3.69735 |
| SF3A2        | -5.23048 | -2.97988 | -5.14375 | -2.63277 | -3.10627 |
| TLE4         |          | -4.46563 | -5.29177 | -4.7632  | -4.59071 |
| NEFM         | -2.54426 | -3.61926 | -5.20928 | -3.61604 | -4.13612 |
| RAB11B       |          | -3.21053 | -5.42546 | -5.04698 | -5.45634 |
| CNNM3        | -4.66971 | -5.70257 | -4.31566 | -2.33552 | -2.15286 |
| ATPIF1       | -2.51958 | -3.37858 | -2.92975 | -5.32616 | -5.05754 |
| NKRF         | -3.70094 | -4.08181 | -4.49043 | -3.79031 | -3.15827 |
| TPM2         | -8.14504 |          | -6.30169 | -4.82843 |          |
| MT1E         | -1.90839 | -5.65408 | -5.72035 | -3.45283 | -2.58518 |
| MT1M         | -1.90839 | -5.65408 | -5.72035 | -3.45283 | -2.58518 |
| HMG2         | -2.09869 | -7.09145 | -5.01563 |          | -5.13983 |
| REEP5        | -2.59855 | -3.84474 | -3.26312 | -4.27733 | -5.3644  |
| PLRG1        | -8.04049 | -2.78957 | -1.86596 | -3.37825 | -3.3182  |
| RPL28        | -4.05301 | -4.23497 | -4.12877 | -3.82166 | -3.18338 |
| HNRNPM       | -4.6232  | -4.70853 | -2.98092 | -3.54394 | -3.60499 |
| HLA-B        | -3.64988 | -5.34063 | -2.8023  | -3.83091 | -3.83927 |
| HLA-C        | -3.64988 | -5.34063 | -2.8023  | -3.83091 | -3.83927 |
| LSM4         | -5.11358 | -4.12838 | -5.12604 | -2.45591 | -2.69135 |
| LRBA         | -4.64861 | -4.51033 | -4.36293 | -6.02414 |          |
| ASPH         | -5.77709 | -2.63497 |          | -5.86088 | -5.28466 |
| ATXN2L       | -2.08421 | -5.6015  | -5.16924 | -4.98815 | -1.71639 |
| INIP         | -4.27096 | -4.9338  | -5.69663 |          | -4.70403 |
| GIPC1        | -4.06366 | -4.5397  | -2.21413 | -3.82047 | -4.97017 |
| HEL-S-109    |          | -4.69888 | -4.88773 | -5.72282 | -4.31641 |
| NUCB2        |          | -4.69888 | -4.88773 | -5.72282 | -4.31641 |
| SETBP1       | -4.63812 | -4.44592 | -2.86359 | -2.62184 | -5.06662 |
| SUMO3        | -4.09943 | -4.06265 | -4.40691 | -3.18767 | -3.89006 |

|           |          |          |          |          |          |
|-----------|----------|----------|----------|----------|----------|
| NDUFA5    | -4.13452 | -4.9973  |          | -5.39188 | -5.12436 |
| PPHLN1    | -6.32944 | -5.10481 |          | -3.76064 | -4.57532 |
| KARS      | -6.11055 | -4.55625 | -6.04847 | -3.11038 |          |
| HSDL2     | -4.27402 | -3.4536  | -4.56017 | -3.42502 | -4.17366 |
| HAX1      | -4.00028 | -4.31192 |          | -6.11799 | -5.4582  |
| SNRPD2    |          | -4.05667 | -5.92684 | -5.22175 | -4.72206 |
| LMAN2L    | -4.01871 |          | -4.91898 | -5.42342 | -5.61509 |
| ATP5F1    | -2.94982 | -5.58179 | -4.8878  |          | -6.55835 |
| AGK       | -1.17916 | -4.36255 | -4.83768 | -3.98762 | -5.63657 |
| ERH       | -1.20376 | -5.72022 | -3.42412 | -4.36445 | -5.29725 |
| WDR18     | -5.0344  | -5.24793 | -4.58206 |          | -5.16225 |
| PTBP2     | -6.16541 |          |          | -7.02535 | -6.8366  |
| CBS       | -1.63566 | -5.75762 | -5.59167 | -5.88416 | -1.23532 |
| CECR5     | -4.88664 | -5.25284 |          | -5.70863 | -4.30323 |
| RPL37A    | -4.46198 | -5.01253 | -4.38399 | -4.30362 | -2.03255 |
| PDCD4     | -4.523   |          | -5.51754 | -5.28284 | -4.8968  |
| AK4       | -2.97859 | -4.62678 | -4.88446 | -3.77172 | -3.96586 |
| IDH3A     | -5.18459 | -4.44182 | -3.14165 | -3.30479 | -4.18567 |
| CD59      | -4.75384 | -4.91396 | -4.78659 | -2.14399 | -3.67455 |
| RDX       | -5.77313 | -4.14441 | -1.64209 | -4.38709 | -4.40888 |
| PPIH      | -4.31308 | -4.06963 | -4.02571 | -4.36541 | -3.63771 |
| H2AFX     |          | -6.62986 | -5.72369 |          | -8.08532 |
| COA3      | -5.10828 |          | -5.69513 | -4.55435 | -5.16686 |
| RPL10     | -5.51928 | -3.34035 | -5.69653 | -3.86441 | -2.13874 |
| SH3BGRL3  | -5.28028 | -5.44046 | -5.37256 | -4.52144 |          |
| LSM8      |          | -4.77841 | -5.66161 | -4.97028 | -5.25816 |
| RPL27A    |          | -10.0358 |          | -2.10736 | -8.54864 |
| STMN4     | -4.76667 | -4.16353 | -5.02247 | -3.33121 | -3.44606 |
| IDH2      |          | -4.05946 | -7.86899 | -4.09984 | -4.72868 |
| TBRG4     |          | -6.20699 | -8.01511 | -6.55018 |          |
| SMG9      | -4.10003 | -5.55353 | -3.34812 | -3.84959 | -3.92629 |
| SEC62     | -4.54965 | -5.2489  |          | -6.45647 | -4.55023 |
| PES1      | -5.21455 | -5.55959 | -5.60867 | -4.42919 |          |
| TCOF1     | -5.05379 | -2.69368 | -6.64848 | -3.11296 | -3.3235  |
| NDUFAF4   | -5.72997 | -3.9432  | -4.83802 | -6.33355 |          |
| STX7      | -5.22226 | -5.65907 | -5.34347 | -4.68951 |          |
| DPM3      | -4.90599 | -4.34918 | -4.40864 | -4.13019 | -3.14252 |
| FDPS      | -2.66969 | -7.34411 | -4.13682 | -3.0395  | -3.78747 |
| PHPT1     | -5.3406  | -3.65272 | -5.20599 | -2.7562  | -4.02919 |
| C14orf166 |          | -5.6902  | -5.2139  | -4.79525 | -5.35687 |
| LARP1     | -5.21268 | -4.44767 | -4.39428 | -3.35169 | -3.66781 |
| PELO      | -4.51194 | -3.94831 | -4.43919 | -4.3095  | -3.89211 |
| EIF3M     | -4.33676 | -4.41178 | -4.45814 | -3.87372 | -4.03554 |
| RBX1      | -5.28425 | -4.86993 | -5.51745 |          | -5.44682 |
| AP1G1     | -5.0688  | -5.35742 | -5.50152 |          | -5.22496 |
| SRPK3     | -4.18494 | -4.3332  | -4.19158 | -3.73565 | -4.73814 |

|          |          |          |          |          |          |
|----------|----------|----------|----------|----------|----------|
| TRAFD1   | -4.65776 | -4.05569 | -6.09701 | -3.31801 | -3.11694 |
| FAF1     | -2.89307 | -6.4032  | -3.65202 | -3.2299  | -5.08432 |
| MRPS30   | -6.23161 | -4.6515  | -5.9626  |          | -4.49192 |
| SEC31A   | -6.20277 | -2.68174 | -6.57541 | -2.74045 | -3.16096 |
| MOV10    | -5.30182 | -5.68855 | -5.50666 | -4.93964 |          |
| NUDT4    | -3.35216 | -5.64325 | -3.71012 | -3.47625 | -5.37497 |
| GSTM2    | -4.19059 | -4.6047  | -4.29938 | -3.66107 | -4.8046  |
| GSTM5    | -4.19059 | -4.6047  | -4.29938 | -3.66107 | -4.8046  |
| PLAA     | -6.78559 | -3.09967 | -4.882   | -3.17408 | -3.64067 |
| NDUFS6   | -2.35716 | -6.13723 | -2.40031 | -6.16306 | -4.64045 |
| EPHA1    | -4.15138 | -5.85843 | -3.58684 | -4.0743  | -4.03002 |
| CASP3    | -3.6092  | -6.17586 | -3.73259 | -3.3312  | -4.87781 |
| ATP5D    | -4.66927 | -4.71738 | -4.36929 | -3.42953 | -4.59229 |
| RPL37AP8 | -2.38996 | -4.98825 | -5.08944 | -4.16979 | -5.14358 |
| ZMYND8   |          | -7.02508 | -4.37559 | -4.91241 | -5.49429 |
| EDC3     | -5.48378 | -5.75713 | -5.68883 | -4.90637 |          |
| PDIA4    | -4.5461  | -4.35543 | -4.26975 | -3.93264 | -4.74989 |
| SRFBP1   | -4.66159 | -4.33369 | -4.68749 | -4.13513 | -4.07435 |
| PTCD3    | -5.70367 | -6.49356 | -4.04004 |          | -5.68621 |
| DDX46    | -5.43041 | -3.39499 | -5.50861 | -4.77444 | -2.8412  |
| MAGED2   | -5.40322 | -3.85146 | -5.4058  | -3.21653 | -4.07487 |
| RARA     | -3.94285 | -5.86028 | -3.90118 | -4.41347 | -3.91848 |
| EIF3B    | -4.47637 | -4.32124 | -5.30535 | -3.38505 | -4.56041 |
| APIP     | -5.66092 | -5.75006 |          | -4.36831 | -6.28807 |
| ARHGEF2  | -4.53546 | -2.78455 | -5.31077 | -5.82438 | -3.7023  |
| SNRPC    | -5.58285 | -5.67795 | -5.52619 |          | -5.37456 |
| DDX4     | -5.38665 | -4.91032 | -4.50033 | -2.10313 | -5.36272 |
| AGAP3    | -5.16439 | -7.30807 | -5.42309 | -4.52213 |          |
| CS       | -5.22042 | -4.53609 | -5.55184 | -2.87752 | -4.26252 |
| TRAP1    |          | -5.62501 | -6.62576 | -4.88721 | -5.33105 |
| PCBP2    | -4.77925 | -4.24451 | -4.556   | -4.34613 | -4.57209 |
| PSMA1    | -5.42478 | -3.17344 | -3.65412 | -4.84956 | -5.43485 |
| EIF3G    | -5.6313  | -3.55223 | -5.87966 | -3.61441 | -3.93971 |
| PCYOX1   | -1.9126  | -5.28724 | -4.95108 | -5.72388 | -4.78503 |
| HARS2    | -4.55522 | -4.30991 | -4.66192 | -4.04506 | -5.09817 |
| MATR3    | -5.40709 | -4.71838 | -5.56565 | -4.42417 | -2.56844 |
| SEC61A2  | -4.78279 | -4.72953 | -4.13156 | -4.28688 | -4.76385 |
| RBM3     | -2.81892 | -14.1762 | -2.84403 | -2.85664 |          |
| REXO4    | -6.15304 | -3.13372 | -6.20833 | -2.7367  | -4.49684 |
| RPL13    | -5.46717 | -2.58319 | -4.99943 | -4.83607 | -4.87123 |
| FOXK2    | -3.71763 | -7.63066 | -4.71455 | -3.53532 | -3.1841  |
| JAGN1    | -1.59523 | -5.78354 | -5.01074 | -4.99844 | -5.42537 |
| PHB2     | -1.86453 | -5.74685 | -5.20613 | -4.81701 | -5.25121 |
| HIST1H1C | -6.91493 | -4.9117  | -2.40476 | -6.08997 | -2.60484 |
| SEC61A1  | -5.1352  | -4.66178 | -4.13156 | -4.28688 | -4.71282 |
| PNN      | -2.17213 | -5.66261 | -4.80563 | -4.92362 | -5.37639 |

|         |          |          |          |          |          |
|---------|----------|----------|----------|----------|----------|
| HMGN4   | -5.96091 | -5.89779 | -2.72288 | -4.44234 | -3.95113 |
| CAPZA2  | -2.67259 | -5.48623 | -5.16442 | -4.60675 | -5.21904 |
| SMARCE1 | -2.51099 | -4.75258 | -4.76505 | -5.00203 | -6.13952 |
| UQCRB   | -4.84067 | -6.32612 |          | -6.16547 | -5.84958 |
| ARPP19  | -5.81093 | -3.38029 | -6.06673 | -3.18593 | -4.74266 |
| RNMTL1  | -5.13713 | -4.86181 | -4.63101 | -4.26204 | -4.334   |
| EIF4G2  | -5.14859 | -3.51698 | -5.24274 | -4.25063 | -5.08561 |
| RPS25   | -5.80139 | -9.25642 |          |          | -8.20431 |
| NME1    | -4.43498 | -5.17076 | -5.52859 | -3.06628 | -5.12523 |
| SUGP2   |          | -5.40913 | -7.67616 | -5.24679 | -5.00569 |
| TJP1    | -9.28902 | -1.67118 | -1.93635 | -5.88508 | -4.65555 |
| HDGFRP2 | -5.26517 | -5.70614 | -5.47177 | -4.50539 | -2.60655 |
| GPKOW   | -4.74284 | -5.34473 | -5.16134 | -4.29502 | -4.04348 |
| RPL30   | -5.276   | -5.54595 | -2.76793 | -4.76832 | -5.32568 |
| CUL3    | -5.01355 | -4.38649 | -5.16701 | -4.38975 | -4.7468  |
| UBE2Z   | -5.49358 | -5.697   | -5.29869 | -4.94406 | -2.27474 |
| CBX1    | -9.43251 | -4.51135 | -3.71741 | -3.66025 | -2.40244 |
| WARS    | -5.15572 | -4.75253 | -4.37515 | -4.6263  | -4.86475 |
| SRP68   | -3.78651 | -3.79622 | -8.22924 | -8.11074 |          |
| THOC5   | -4.52908 | -4.64561 | -5.09969 | -4.86277 | -4.91247 |
| H1FO    | -2.29637 | -4.06689 | -5.08023 | -5.40733 | -7.22845 |
| YY2     | -2.58352 | -5.71604 | -5.46823 | -4.96666 | -5.42228 |
| ATXN2   | -5.20544 | -4.52649 | -5.15133 | -4.69733 | -4.66636 |
| IMPDH1  | -5.02296 | -4.54991 | -5.06672 | -4.47254 | -5.21175 |
| NEMF    | -4.42756 | -5.28942 | -5.01646 | -4.66339 | -4.98257 |
| EIF4A3  | -5.44501 | -5.60138 | -2.98695 | -4.8479  | -5.51706 |
| TARS    | -4.72172 | -5.45412 | -4.6589  | -4.40651 | -5.16896 |
| DDX3Y   | -4.87728 | -5.08661 | -4.9927  | -4.54167 | -4.99445 |
| PICALM  | -4.98764 | -4.77503 | -5.20744 | -4.56811 | -4.96402 |
| UFM1    | -4.89767 | -5.19118 | -4.76829 | -4.40005 | -5.2638  |
| NDUFB11 | -5.03812 | -5.20045 | -5.10792 | -4.18187 | -5.01165 |
| CTBP2   | -5.18113 | -4.62534 | -5.14157 | -4.49793 | -5.16507 |
| TNPO3   | -2.03511 | -5.51842 | -5.94533 | -5.99495 | -5.15353 |
| RAD23A  | -4.9263  | -4.90182 | -5.12115 | -4.46506 | -5.29901 |
| ARPC3   | -4.98152 | -5.09544 | -5.16532 | -4.36831 | -5.15753 |
| ACSL3   | -4.63473 | -5.94915 | -4.2796  | -4.96273 | -4.9775  |
| UBE2C   | -4.96723 | -5.14944 | -5.05212 | -4.42236 | -5.25073 |
| PSMB7   | -4.99691 | -4.96915 | -5.02693 | -4.41089 | -5.45651 |
| HCFC2   | -5.11933 | -5.26044 | -5.17764 | -4.33127 | -5.08168 |
| SP100   | -4.73354 | -5.49745 | -4.66319 | -4.88202 | -5.29697 |
| DPYSL5  | -5.00661 | -5.27055 | -5.10738 | -4.44352 | -5.27812 |
| UBE2D2  | -4.78417 | -2.62528 | -8.24164 | -2.14884 | -7.38529 |
| EXOSC4  | -5.24928 | -4.87591 | -5.35449 | -4.48563 | -5.23036 |
| 40057   | -5.05453 | -5.46499 | -5.06188 | -4.50708 | -5.14838 |
| LCP1    |          | -6.12033 | -6.77008 | -5.44633 | -6.90431 |
| HGH1    | -5.36044 | -5.43261 | -5.21663 | -4.53145 | -5.07159 |

|         |          |          |          |          |          |
|---------|----------|----------|----------|----------|----------|
| UBL5    | -5.24881 | -5.33386 | -5.3062  | -4.69828 | -5.3341  |
| SNRPF   | -5.4403  | -5.73926 | -4.31862 | -5.14189 | -5.33137 |
| TMEM41B |          | -5.69977 | -8.445   | -5.62613 | -6.30196 |
| TMEM180 |          | -7.20109 | -5.82679 | -6.75557 | -6.37137 |
| ADRM1   | -5.33097 | -5.44569 | -5.4056  | -4.69544 | -5.391   |
| ARF5    | -5.33067 | -5.65143 | -5.11866 | -4.79241 | -5.38654 |
| POLRMT  | -4.86626 | -5.38373 | -4.42114 | -6.32853 | -5.37705 |
| MARS    | -5.36    | -5.21882 | -6.09765 | -3.98115 | -5.75213 |
| SNRPA   | -5.30764 | -5.56998 | -5.46036 | -4.84685 | -5.24271 |
| GNB3    | -5.49391 | -5.3995  | -5.87767 | -4.58742 | -5.11406 |
| GNB4    | -5.49391 | -5.3995  | -5.87767 | -4.58742 | -5.11406 |
| STAU2   | -5.36044 | -5.60862 | -5.47655 | -4.83702 | -5.37716 |
| YY1     | -5.38705 | -5.7204  | -5.44456 | -5.05237 | -5.42446 |
| YARS2   |          | -5.91674 | -8.7079  | -6.18342 | -6.25421 |
| TCEA2   | -5.39512 | -5.79077 | -5.65493 | -5.05073 | -5.49063 |
| EBP     | -5.832   | -4.91765 | -6.21543 | -8.51453 | -2.17    |
| PDCD5   | -5.4503  | -6.92339 | -5.15005 | -5.4894  | -6.41734 |
| HNRNPL  | -2.15736 | -8.75538 | -10.8127 | -4.99085 | -2.96078 |
| EIF3H   | -5.35421 | -7.169   | -5.42644 | -5.96185 | -7.1057  |
