# Supplementary material for: GPR19 Coordinates Multiple Molecular Aspects of Stress Responses Associated with the Aging Process
Source: MDPI journal article supplement (doi:10.3390/ijms24108499), 2023-05-09
Supplement: s1 [file s1]

## **Data Supplement**

### **GPR19 coordinates multiple molecular aspects of stress responses associated with the aging process**

Stuart Maudsley<sup>1\*</sup>, Claudia Schrauwen<sup>1</sup>, İrem Harputluoğlu<sup>1</sup>, Deborah Walter<sup>1</sup>, Hanne Leysen<sup>1</sup>, Patricia McDonald<sup>2</sup>

1. Receptor Biology Lab, Department of Biomedical Science, University of Antwerp.
2. H. Lee Moffitt Cancer Center, Tampa, FL, USA

\* Corresponding Author: Prof. Stuart Maudsley – [stuartmaudsley@uantwerpen.be](mailto:stuartmaudsley@uantwerpen.be):  
[receptorbiologylab@gmail.com](mailto:receptorbiologylab@gmail.com)

**Table S5. Gene Ontology term enrichment of the leading-edge ‘Cellular Response to Stress’.** For each significantly-enriched Gene Ontology (GO) biological process term the degree of enrichment (R) and the negative log<sub>10</sub> of the enrichment probability (P) is shown. The associated hybrid score (H) is generated for each GO term via multiplication of R\*P.

| Gene Ontology Term                                             | Enrichment (R) | -log <sub>10</sub> P (P) | Hybrid Score (H) |
|----------------------------------------------------------------|----------------|--------------------------|------------------|
| DNA damage response, signal transduction by p53 class mediator | 19.82758621    | 23.05061                 | 457.0379568      |
| Signal transduction in response to DNA damage                  | 18.75          | 23.446117                | 439.6146933      |
| DNA damage checkpoint                                          | 17.6056338     | 23.716699                | 417.5475136      |
| DNA integrity checkpoint                                       | 16.55629139    | 23.02365                 | 381.1862586      |
| Mitotic cell cycle checkpoint                                  | 19.59459459    | 28.9914                  | 568.0747264      |
| Cell cycle checkpoint                                          | 12.90322581    | 29.402305                | 379.3845782      |
| S phase of mitotic cell cycle                                  | 16.78321678    | 22.241845                | 373.2897126      |
| G1/S transition of mitotic cell cycle                          | 13.46153846    | 23.257275                | 313.0787002      |
| Chromatin assembly                                             | 18.11023622    | 22.099633                | 400.2295717      |
| Nucleosome assembly                                            | 18.91891892    | 20.59176                 | 389.5738385      |
