# Supplementary material for: GPR19 Coordinates Multiple Molecular Aspects of Stress Responses Associated with the Aging Process
Source: MDPI journal article supplement (doi:10.3390/ijms24108499), 2023-05-09
Supplement: s1 [file s1]

## **Data Supplement**

### **GPR19 coordinates multiple molecular aspects of stress responses associated with the aging process**

Stuart Maudsley<sup>1\*</sup>, Claudia Schrauwen<sup>1</sup>, İrem Harputluoğlu<sup>1</sup>, Deborah Walter<sup>1</sup>, Hanne Leysen<sup>1</sup>, Patricia McDonald<sup>2</sup>

1. Receptor Biology Lab, Department of Biomedical Science, University of Antwerp.
2. H. Lee Moffitt Cancer Center, Tampa, FL, USA

\* Corresponding Author: Prof. Stuart Maudsley – [stuartmaudsley@uantwerpen.be](mailto:stuartmaudsley@uantwerpen.be):  
[receptorbiologylab@gmail.com](mailto:receptorbiologylab@gmail.com)

**Table S1. GPR19 induced protein expression alterations in the cytoplasmic (CE1) compartment.** Significantly-regulated proteins (identified by official Gene Symbols) found in cells, differential between mock-transfection and the specific GPR19 expression level (0.5, 1, 2, 5, 10µg), are represented as a log2-transformed and normalized expression ratio between the specific GPR19 expression level and the expression level found in cells receiving empty vector transfection.

| Gene Symbol | CE1 0.5  | CE1 1    | CE1 2    | CE1 5    | CE1 10   |
|-------------|----------|----------|----------|----------|----------|
| FBXO41      | 10.69676 | 9.083785 | 10.7104  | 9.093955 | 9.55885  |
| PABPC4      | 7.79277  | 7.089818 | 7.918565 | 6.834981 | 7.504267 |
| TUBB4A      | 8.61452  | 3.305781 | 7.270007 | 3.921923 | 9.986918 |
| DBNL        | 7.112253 | 5.421084 | 7.087368 | 5.404547 | 5.731172 |
| PDHA1       | 6.800228 | 6.745516 | 7.592351 |          | 7.789457 |
| HDAC2       | 6.980002 | 4.572511 | 7.062519 | 4.546455 | 5.417666 |
| GNL3        | 6.41779  | 6.547671 | 5.554245 | 7.044593 | 2.428604 |
| HMGA2       | 6.025469 | 6.291443 | 3.564368 | 4.1637   | 6.806156 |
| G3BP2       | 6.444117 | 2.507962 | 6.417986 | 5.351643 | 5.620753 |
| CKS1B       | 5.350146 | 4.71393  | 5.694834 | 4.757231 | 5.632189 |
| HIST1H3A    | 6.705344 | 5.554681 | 5.815956 | 2.535865 | 5.469338 |
| PCK2        | 6.563432 | 4.35029  | 4.916279 | 3.959524 | 5.521555 |
| PRKACA      | 6.351085 | 2.344109 | 5.787345 | 5.140983 | 5.545881 |
| ALDH7A1     | 5.939367 | 4.592883 | 5.574678 | 3.816389 | 5.122418 |
| MDC1        | 5.577719 | 5.234245 | 4.315547 | 4.739501 | 4.836119 |
| MAT2B       | 4.3955   | 5.011012 | 5.450945 | 4.575029 | 5.189891 |
| ATP2A3      |          | 6.154594 | 6.655536 | 5.347379 | 6.317634 |
| TRAP1       | 9.638381 |          | 9.579779 | 3.96138  |          |
| PLS1        | 5.729315 | 3.552736 | 5.694644 | 3.81653  | 4.259494 |
| DNAJB1      | 4.243082 | 4.455654 | 4.976607 | 5.043156 | 4.251115 |
| CHCHD2      | 6.249968 | 3.22541  | 5.912626 | 2.499023 | 4.102614 |
| CHCHD2P9    | 6.249968 | 3.22541  | 5.912626 | 2.499023 | 4.102614 |
| NUP210      | 5.34126  | 4.045645 | 5.126187 | 2.866908 | 4.500165 |
| ETFA        | 4.40973  | 5.670759 | 3.73405  | 4.027265 | 4.028338 |
| ABCF2       | 5.517496 |          | 5.691547 | 5.027874 | 5.562682 |
| TUBA1A      | 4.663854 | 5.565738 | 4.189228 | 3.59049  | 3.775831 |
| FH          | 5.41596  | 3.047286 | 5.364222 | 3.710613 | 4.096651 |
| M6PR        | 4.640428 | 3.09044  | 4.399486 | 4.200679 | 4.571461 |
| CLPB        | 4.117615 | 4.983297 | 3.966944 | 3.667042 | 4.131427 |
| THOC3       | 4.848999 | 3.51066  | 4.882007 | 3.359276 | 4.258321 |
| PPAN        | 4.893352 | 3.032209 | 5.148684 | 4.845688 | 2.406189 |
| MTHFD1L     | 4.3336   | 4.314832 | 3.52759  | 4.027336 | 3.873402 |
| MT-CO2      | 5.108253 |          | 5.634829 | 3.571318 | 5.229374 |
| TALDO1      | 3.693871 | 3.549166 | 4.304534 | 2.850333 | 4.534236 |
| DTYMK       |          | 4.721363 | 4.302695 | 4.702006 | 4.868732 |
| RPN2        | 3.522472 |          | 4.303988 | 6.208293 | 3.972253 |
| GRWD1       | 3.411892 | 3.875944 | 3.603543 | 3.388359 | 3.596786 |

|               |          |          |          |          |          |
|---------------|----------|----------|----------|----------|----------|
| DNMT1         | 1.964771 | 5.353118 |          | 5.631031 | 4.80777  |
| SSBP1         | 4.081832 | 4.549111 | 4.397995 | 4.679666 |          |
| CDKN2B        | 2.039445 | 3.393592 | 5.046009 | 3.520885 | 3.688438 |
| RPLP2         | 4.250819 | 3.084179 | 3.485987 | 3.446997 | 3.241341 |
| HADHB         | 4.171443 | 2.590638 | 4.564615 | 6.058642 |          |
| NVL           | 4.385069 | 4.05471  |          | 4.065401 | 4.613088 |
| CHORDC1       | 4.500437 | 5.945401 | 4.027775 | 2.594438 |          |
| COX7C         | 4.305266 | 3.275132 | 3.706722 | 2.56665  | 3.152461 |
| CHD5          | 3.454825 |          | 3.845628 | 4.005116 | 5.226618 |
| EPB41L2       | 1.943074 | 3.25986  | 4.665453 | 3.22015  | 3.361896 |
| ILKAP         | 4.13834  | 2.557866 | 4.19354  | 2.454376 | 3.08642  |
| CDKN2A        | 2.039445 | 3.172306 | 4.669283 | 3.131024 | 3.415068 |
| RBBP7         | 2.597623 | 4.844398 | 2.437794 | 3.513227 | 2.590523 |
| POLR2L        | 4.858581 | 2.500192 | 3.128831 | 2.422085 | 2.892313 |
| CDV3          | 4.673244 | 3.639074 | 4.588095 |          | 2.297464 |
| ACAA2         |          | 2.724134 | 4.166083 | 3.749408 | 4.55429  |
| PLD3          | 3.286029 | 5.564812 | 3.587991 | 2.708124 |          |
| CIAPIN1       | 4.272707 | 3.534425 |          | 3.02188  | 4.186033 |
| STRBP         | 3.411098 | 3.678277 | 3.605837 | 4.243541 |          |
| U2AF1L4       | 2.651158 | 3.085298 | 3.128173 | 2.599909 | 3.442912 |
| DKFZp313C1541 | 3.159809 | 3.905038 | 3.35076  | 3.962476 |          |
| RAB2B         | 3.159809 | 3.905038 | 3.35076  | 3.962476 |          |
| TJP1          | 3.566159 | 6.188    | 4.573483 |          |          |
| TMEM43        | 6.004525 |          | 3.506795 | 4.790811 |          |
| TMX1          | 2.451503 | 2.554154 | 2.822177 | 2.948004 | 3.108268 |
| THOC2         | 3.489708 | 3.496777 | 3.505909 | 3.342624 |          |
| RPL9          | 2.252475 | 4.258341 | 2.80875  |          | 4.503358 |
| PABPN1        | 3.075848 |          | 3.005544 | 3.910261 | 3.798488 |
| C1D           |          | 3.28747  | 3.038958 | 3.840286 | 3.575711 |
| HSDL1         | 3.56927  | 4.081143 | 3.603531 | 2.397403 |          |
| H3F3C         |          | 3.990903 |          | 5.689182 | 3.734658 |
| ZC3H14        |          | 3.79447  | 2.767172 | 3.39016  | 3.338645 |
| BRD3          |          | 2.670045 | 4.038248 | 3.37489  | 3.008545 |
| BRD4          |          | 2.670045 | 4.038248 | 3.37489  | 3.008545 |
| ATP2A2        | 5.130864 | 3.4916   |          |          | 4.231958 |
| DIABLO        | 3.001858 | 3.100342 |          | 4.095286 | 2.576088 |
| HIST2H3PS2    |          | 3.990903 |          | 4.752464 | 3.734658 |
| SRSF9         | 2.361875 |          | 2.755881 | 3.080814 | 4.263432 |
| UBE2A         | 2.149374 | 3.820374 | 3.532983 |          | 2.745289 |
| TRIP13        |          | 2.699176 | 4.053877 | 2.308015 | 3.098892 |
| H2AFY2        |          |          | 4.399874 | 4.845201 | 2.71921  |
| UBL4A         | 2.872313 |          | 2.711075 | 2.902186 | 3.283377 |
| PRDX4         | 2.627755 | 2.508921 |          | 2.669105 | 3.692437 |
| ZC3HC1        |          | 3.914305 |          | 3.584355 | 3.730338 |
| EIF4B         |          | 3.607411 |          | 4.166563 | 3.212064 |

|            |          |          |          |          |          |
|------------|----------|----------|----------|----------|----------|
| PITRM1     |          | 4.302467 |          | 3.160042 | 3.518041 |
| LIMD1      |          | 3.663601 |          | 3.801876 | 3.513859 |
| SNRPD1     | 3.22892  | 2.734593 |          | 2.421673 | 2.548734 |
| CANX       | 3.60814  |          | 3.494015 | 3.812525 |          |
| POLR1C     | 3.126978 |          | 2.681277 | 2.644198 | 2.331464 |
| TPX2       | 2.934783 | 2.561411 |          | 2.611755 | 2.665921 |
| ARFIP2     |          | 3.56292  |          | 3.678461 | 3.49587  |
| RPS15A     | 2.232466 | 2.609811 | 2.594986 |          | 3.014615 |
| LMNA       | 2.9199   | 3.662488 |          | 3.782661 |          |
| MAGOHB     | 1.987006 | 2.927922 | 3.102642 |          | 2.323051 |
| BCAS2      | 2.825456 |          | 3.756229 | 3.634624 |          |
| HACD3      |          |          | 2.746909 | 4.128474 | 3.335625 |
| EIF1       | 2.369642 | 2.636721 | 2.48903  |          | 2.201114 |
| GBAS       | 2.041613 |          | 2.237197 | 2.837679 | 2.401106 |
| RPL38      | 2.328322 | 2.800782 | 1.950077 |          | 2.415705 |
| ABHD10     | 4.413496 |          |          | 4.955009 |          |
| PPP4R2     |          |          | 2.905439 | 2.930947 | 3.485517 |
| H2AFV      |          | 2.451433 |          | 4.183837 | 2.678711 |
| PPIF       |          | 2.83708  | 2.381816 | 4.037908 |          |
| PTBP3      | 2.255026 |          | 2.193605 | 2.727708 | 2.072868 |
| DPY30      |          | 2.9679   |          | 3.061497 | 3.137028 |
| MAP1S      | 2.48879  | 2.618711 | 1.972609 |          | 2.046283 |
| H2AFZ      |          | 2.451433 |          | 3.994732 | 2.678711 |
| FMR1       | 2.987731 | 3.420831 | 2.589099 |          |          |
| KDM1A      | 4.40447  |          | 4.438439 |          |          |
| HIST2H2AA3 |          | 2.733706 |          | 6.078214 |          |
| HIST2H2AC  |          | 2.733706 |          | 6.078214 |          |
| RPL22      | 2.860579 |          | 2.581148 |          | 3.348452 |
| NRAS       | 2.910918 |          |          | 2.962181 | 2.870967 |
| EIF3K      |          |          | 2.962331 | 2.875938 | 2.900608 |
| HYOU1      |          |          | 2.750564 | 2.841358 | 3.115781 |
| CSDE1      | 2.497636 | 3.442677 |          |          | 2.688017 |
| CTNNB1     |          | 5.219114 | 3.403984 |          |          |
| RAB5B      | 2.637897 |          | 3.020582 | 2.773151 |          |
| PDE12      |          |          | 4.53943  | 3.85359  |          |
| HRAS       | 2.554413 |          |          | 2.962181 | 2.870967 |
| MAEA       |          | 2.635836 |          | 2.503828 | 3.234395 |
| SIN3A      | 3.961659 | 4.372344 |          |          |          |
| CNOT1      |          | 2.811339 |          | 2.725698 | 2.745248 |
| GNB2L1     | 2.677835 |          |          | 2.824897 | 2.773884 |
| LYZ        |          |          |          | 8.270085 |          |
| UBTF       |          | 2.775355 |          | 2.623433 | 2.803179 |
| NOLC1      |          | 3.74708  |          | 4.429179 |          |
| TOP2B      |          | 3.113541 | 2.647692 |          | 2.406301 |
| POLR2B     | 2.680934 |          | 2.764865 |          | 2.64382  |

|          |          |          |          |          |          |
|----------|----------|----------|----------|----------|----------|
| PSPC1    | 2.744088 |          | 2.898658 | 2.429015 |          |
| ACTA1    |          | 2.833885 | 2.58068  |          | 2.646226 |
| ACTA2    |          | 2.833885 | 2.58068  |          | 2.646226 |
| ACTC1    |          | 2.833885 | 2.58068  |          | 2.646226 |
| SDHA     |          | 3.395392 |          | 4.663784 |          |
| NOP58    |          |          | 2.190343 | 3.757845 | 2.102168 |
| RAB35    |          | 2.993561 |          | 2.345817 | 2.698869 |
| PPP2R1B  |          | 2.709558 |          | 2.719097 | 2.602009 |
| GNPNAT1  |          | 2.907586 |          | 2.61611  | 2.504529 |
| PPP1R8   |          |          | 2.613168 | 2.660304 | 2.708897 |
| RBM4     |          | 2.93607  | 2.146206 |          | 2.880698 |
| STOML2   |          | 5.223988 |          | 2.711873 |          |
| NUMA1    | 2.356666 | 3.318138 |          | 2.259956 |          |
| H3F3B    |          |          | 2.158461 | 5.689182 |          |
| SART1    |          | 2.596741 |          | 2.52564  | 2.645641 |
| H3F3A    |          |          | 2.158461 | 5.571896 |          |
| DHCR7    | 2.814599 |          | 2.4997   | 2.402    |          |
| WBP11    |          |          | 2.564058 | 2.540589 | 2.535269 |
| ZNF740   | 3.652506 | 3.932609 |          |          |          |
| CISD2    | 2.705118 | 2.869896 | 2.009394 |          |          |
| SLC3A2   |          |          | 2.14787  | 3.280224 | 2.145836 |
| MRPL15   |          |          |          | 3.587739 | 3.977276 |
| PCMT1    | 2.316211 |          |          | 3.081548 | 2.10608  |
| EPPK1    |          | 2.403912 |          | 2.433452 | 2.641812 |
| PDHX     |          |          |          | 3.640508 | 3.82751  |
| STAG2    | 2.321941 |          | 2.577996 | 2.551638 |          |
| UQCRC2   | 2.26353  |          | 2.066224 | 3.029847 |          |
| COPS4    | 2.250396 | 2.704454 | 2.396573 |          |          |
| STX12    |          |          | 1.953191 | 2.78968  | 2.590861 |
| RRP8     |          | 4.402776 |          |          | 2.926458 |
| RAB2A    |          |          | 3.35076  | 3.962476 |          |
| IGF2R    |          | 5.019741 | 2.288653 |          |          |
| HSPA8    | 2.535244 | 2.767095 | 1.982832 |          |          |
| CYC1     | 4.491854 | 2.748702 |          |          |          |
| ATP5A1   |          | 4.529002 |          | 2.626821 |          |
| TP53BP1  |          |          | 4.113898 |          | 3.021948 |
| RBBP4    |          | 2.951659 | 2.043936 |          | 2.121506 |
| NDUFS2   |          | 3.608532 | 3.418382 |          |          |
| COX6B1   |          |          | 2.80584  | 4.143793 |          |
| RPS27L   |          | 3.586871 |          |          | 3.352327 |
| MYL6     | 2.523746 |          |          | 2.022944 | 2.364625 |
| EEF1B2   |          |          | 6.901283 |          |          |
| SLC25A13 |          |          | 3.026896 | 3.852205 |          |
| DDX27    |          | 4.658491 |          | 2.207918 |          |
| TUBA4B   | 1.969895 |          | 2.757484 | 2.125315 |          |

|           |          |          |          |          |          |
|-----------|----------|----------|----------|----------|----------|
| COX5A     | 2.419497 |          |          | 4.391836 |          |
| TECR      |          | 3.335086 |          | 3.398467 |          |
| CALM1     |          | 4.14236  | 2.515178 |          |          |
| CALM2     |          | 4.14236  | 2.515178 |          |          |
| CALM3     |          | 4.14236  | 2.515178 |          |          |
| RCC1      | 1.954594 |          | 1.902196 | 2.737198 |          |
| DDX42     | 1.920469 |          |          | 2.512498 | 2.09943  |
| CERS2     |          | 2.302802 |          | 4.221438 |          |
| SEH1L     |          |          | 3.148777 |          | 3.291323 |
| AIMP1     |          | 3.074346 |          | 3.356424 |          |
| RBM39     |          | 4.387852 |          | 2.034332 |          |
| IGHA1     |          |          |          | 6.412257 |          |
| IGHA2     |          |          |          | 6.412257 |          |
| ALG10     |          | 3.660608 |          |          | 2.749062 |
| MRPL4     |          |          |          | 6.368657 |          |
| USP11     |          |          | 4.007856 |          | 2.338879 |
| USP4      |          |          | 4.007856 |          | 2.338879 |
| GRPEL1    |          | 3.194287 |          | 3.074856 |          |
| MRPS22    |          | 3.915969 |          | 2.155555 |          |
| NOL6      |          | 3.279881 |          | 2.781378 |          |
| SLC25A24  |          | 3.396612 |          | 2.659097 |          |
| NPM1      |          | 2.875992 |          | 3.083411 |          |
| SPTLC1    |          | 3.604172 |          | 2.324751 |          |
| HIST1H2BB |          |          |          | 3.775531 | 2.131237 |
| HIST1H2BJ |          |          |          | 3.775531 | 2.131237 |
| HIST1H2BO |          |          |          | 3.775531 | 2.131237 |
| HIST2H2BC |          |          |          | 3.775531 | 2.131237 |
| HIST2H2BD |          |          |          | 3.775531 | 2.131237 |
| HIST2H2BE |          |          |          | 3.775531 | 2.131237 |
| HIST3H2BB |          |          |          | 3.775531 | 2.131237 |
| PSMA8     | 2.828061 |          | 3.052534 |          |          |
| SUPT6H    |          |          |          | 2.52148  | 3.310968 |
| CKAP5     | 2.486409 | 3.313976 |          |          |          |
| UBBP4     | 2.932834 |          | 2.78376  |          |          |
| MRPL48    |          | 3.124901 |          | 2.550286 |          |
| TMEM11    |          | 3.429974 |          | 2.215355 |          |
| CSTF1     |          |          |          | 2.978231 | 2.65747  |
| PDCD6IP   | 2.736209 | 2.827672 |          |          |          |
| CPSF4     |          |          |          | 2.126074 | 3.356246 |
| BID       |          |          |          | 3.21055  | 2.225922 |
| ACTG2     |          | 2.833885 | 2.58068  |          |          |
| SRP72     |          | 2.419086 |          |          | 2.911212 |
| NAP1L1    |          | 3.101041 |          |          | 2.195262 |
| RAVER1    | 5.249719 |          |          |          |          |
| TFAM      | 2.850899 |          |          | 2.391975 |          |

|                    |          |          |          |          |          |
|--------------------|----------|----------|----------|----------|----------|
| TFG                | 2.565857 | 2.675364 |          |          |          |
| ATP5J              |          | 2.302903 |          |          | 2.894686 |
| PTBP1              |          |          |          | 2.716732 | 2.451078 |
| HNRNPUL2           | 2.337714 |          |          | 2.810361 |          |
| HNRNPUL2-<br>BSCL2 | 2.337714 |          |          | 2.810361 |          |
| UBE2D3             |          |          |          | 2.567621 | 2.527655 |
| PYCR1              | 2.341481 |          |          |          | 2.662687 |
| EIF4EBP1           | 2.012551 | 2.974014 |          |          |          |
| ME1                |          | 2.477381 |          | 2.508415 |          |
| PNPO               |          |          |          | 2.367809 | 2.570797 |
| ABCE1              |          |          |          | 2.435538 | 2.501304 |
| EIF3D              |          |          |          | 2.323016 | 2.529778 |
| FAU                | 2.041721 | 2.805489 |          |          |          |
| RPS10              |          |          |          | 2.173257 | 2.634424 |
| STIM2              |          | 2.608553 |          | 2.187502 |          |
| TPM4               |          |          |          | 2.231268 | 2.526874 |
| USP34              |          | 2.610584 |          |          | 2.142424 |
| DDX56              |          |          | 4.744726 |          |          |
| RBM4B              |          |          | 2.012748 |          | 2.704939 |
| RPS2               |          |          |          | 2.464011 | 2.251645 |
| SEC23IP            |          |          |          | 2.242155 | 2.451845 |
| ENO2               | 1.988551 | 2.703322 |          |          |          |
| IARS               | 2.031098 | 2.638719 |          |          |          |
| TUBB               | 4.624252 |          |          |          |          |
| LIN7A              |          |          | 2.458262 | 2.149582 |          |
| VCP                |          |          | 2.272231 |          | 2.321088 |
| GLYR1              | 4.547577 |          |          |          |          |
| S100A8             |          |          |          | 4.487279 |          |
| PRPF4B             |          |          |          | 2.298579 | 2.169365 |
| HBS1L              |          | 2.322189 |          | 2.116446 |          |
| NUP205             | 2.062667 |          | 2.373351 |          |          |
| DYNLRB1            | 2.232533 |          |          | 2.199424 |          |
| PPP2R2A            | 2.009355 |          |          |          | 2.386878 |
| LLGL1              |          |          |          | 4.358447 |          |
| PRPF8              |          |          | 4.342136 |          |          |
| SMARCA5            | 1.906775 |          |          | 2.434429 |          |
| GAPVD1             | 4.297182 |          |          |          |          |
| RBM34              |          |          | 1.921916 |          | 2.356023 |
| RBM12B             | 4.264436 |          |          |          |          |
| TTC4               |          |          |          | 2.046218 | 2.192495 |
| ILK                | 4.231647 |          |          |          |          |
| MRI1               | 4.136177 |          |          |          |          |
| HIST1H2AB          |          |          |          | 4.125427 |          |
| HIST3H2A           |          |          |          | 4.125427 |          |

|                |          |          |          |          |  |
|----------------|----------|----------|----------|----------|--|
| PPP5D1         |          | 4.017922 |          |          |  |
| HPS4           | 4.002302 |          |          |          |  |
| SPCS2          |          |          |          | 3.876953 |  |
| COX5B          | 3.780925 |          |          |          |  |
| MTCH2          |          |          |          | 3.762678 |  |
| NOP56          |          |          |          | 3.753756 |  |
| ALG10B         |          | 3.660608 |          |          |  |
| CHAMP1         |          |          | 3.628948 |          |  |
| ALDOC          |          | 3.591254 |          |          |  |
| DLAT           |          |          |          | 3.583364 |  |
| PGAM5          |          |          |          | 3.532695 |  |
| ATP6V0C        |          | 3.48836  |          |          |  |
| EEF1E1         |          | 3.488351 |          |          |  |
| EEF1E1-BLOC1S5 |          | 3.488351 |          |          |  |
| AFG3L2         |          |          |          | 3.487026 |  |
| CBX5           |          |          |          | 3.463858 |  |
| RAP2A          |          |          |          | 3.458712 |  |
| RAP2B          |          |          |          | 3.458712 |  |
| RAP2C          |          |          |          | 3.458712 |  |
| WDR5           |          |          | 3.457275 |          |  |
| PGLS           |          | 3.325103 |          |          |  |
| GATC           |          | 3.324477 |          |          |  |
| ZC3H13         |          |          |          | 3.297638 |  |
| ALDH6A1        | 3.265312 |          |          |          |  |
| TAF15          |          | 3.249574 |          |          |  |
| MAFF           |          |          |          | 3.248084 |  |
| SRPRB          |          | 3.228421 |          |          |  |
| PPP5C          |          | 3.218278 |          |          |  |
| ACOT13         |          |          |          | 3.184412 |  |
| TOP2A          |          |          |          | 3.179468 |  |
| NUP88          |          |          |          | 3.152366 |  |
| TOMM22         |          |          | 3.149883 |          |  |
| EIF4E          |          | 3.139668 |          |          |  |
| HNRNPK         |          |          |          | 3.125805 |  |
| TFCP2          |          | 3.1238   |          |          |  |
| NDUFB10        |          |          |          | 3.112591 |  |
| NDUFA4         |          |          |          | 3.105566 |  |
| ERCC1          | 3.101348 |          |          |          |  |
| RBMXL2         |          |          |          | 3.086916 |  |
| NRD1           |          | 3.055555 |          |          |  |
| EIF2A          |          | 3.045419 |          |          |  |
| NUP214         |          | 2.95702  |          |          |  |
| TXNRD1         |          | 2.956062 |          |          |  |
| TXNRD2         |          | 2.956062 |          |          |  |
| EIF3F          |          |          |          | 2.955346 |  |



|          |          |          |          |          |          |
|----------|----------|----------|----------|----------|----------|
| NSFL1C   |          | 2.931847 |          |          |          |
| RAB10    |          | 2.904431 |          |          |          |
| POLR2C   |          |          |          |          | 2.871546 |
| HIST1H4A |          |          |          | 2.863412 |          |
| NIFK     |          |          |          | 2.860583 |          |
| UBXN1    |          |          |          | 2.838908 |          |
| SNRNP200 |          |          |          | 2.831406 |          |
| PHB      |          |          |          | 2.830857 |          |
| AKAP1    |          | 2.829234 |          |          |          |
| DBI      |          | 2.829089 |          |          |          |
| TXN2     |          | 2.818951 |          |          |          |
| TM9SF3   |          |          | 2.810339 |          |          |
| SRM      |          | 2.785759 |          |          |          |
| ITGB1    |          |          |          | 2.770795 |          |
| ARID1A   |          |          |          | 2.76516  |          |
| ATP2A1   |          | 2.757501 |          |          |          |
| ZFR      | 2.735266 |          |          |          |          |
| MORF4L1  |          | 2.730774 |          |          |          |
| LAMTOR5  |          | 2.730291 |          |          |          |
| PNPT1    | 2.721037 |          |          |          |          |
| AURKB    |          |          | 2.717967 |          |          |
| SRSF5    | 2.704261 |          |          |          |          |
| RAB1C    |          |          |          | 2.662145 |          |
| GANAB    |          |          |          |          | 2.659805 |
| CDH2     |          | 2.631163 |          |          |          |
| CYB5R3   |          |          |          | 2.61453  |          |
| RALYL    |          |          |          | 2.587561 |          |
| ZNF512   |          |          |          |          | 2.586006 |
| DCD      |          |          |          |          | 2.580951 |
| USP14    |          |          | 2.570397 |          |          |
| CCAR2    |          | 2.569742 |          |          |          |
| HBA1     |          |          |          | 2.566099 |          |
| IWS1     |          | 2.559899 |          |          |          |
| PPIL4    |          |          |          |          | 2.551956 |
| TMED9    |          | 2.547931 |          |          |          |
| TTC19    |          |          |          | 2.543757 |          |
| DDX39B   |          |          |          |          | 2.541536 |
| GLUD2    |          |          |          | 2.535096 |          |
| YLPM1    |          |          |          | 2.529958 |          |
| OAT      | 2.510232 |          |          |          |          |
| GOT2     |          |          |          | 2.484841 |          |
| RPS24    |          |          |          |          | 2.468061 |
| SLC25A6  |          |          |          | 2.45634  |          |
| CAPN1    |          |          |          |          | 2.445969 |
| SEC11A   |          |          |          | 2.416614 |          |

|         |          |          |          |          |          |
|---------|----------|----------|----------|----------|----------|
| RPL39   |          |          |          |          | 2.406652 |
| RPL39P5 |          |          |          |          | 2.406652 |
| PITPNB  |          |          |          |          | 2.401744 |
| SYNGR1  |          |          | 2.398224 |          |          |
| ARF3    |          |          |          |          | 2.39613  |
| ARF4    |          |          |          |          | 2.39613  |
| EXOC3L4 |          | 2.386889 |          |          |          |
| MRPS2   |          |          |          | 2.359031 |          |
| NAPA    |          |          |          | 2.356112 |          |
| ADK     |          |          |          |          | 2.347189 |
| RPS20   |          |          |          |          | 2.342137 |
| PDCD10  |          |          |          |          | 2.333198 |
| ATP5L   |          |          |          | 2.328549 |          |
| RANBP1  | 2.311193 |          |          |          |          |
| HMGB2   |          |          |          |          | 2.304626 |
| TUBB6   |          |          |          |          | 2.29837  |
| ALDH2   |          |          |          |          | 2.295539 |
| RBMXL3  |          |          |          |          | 2.285528 |
| NUP54   |          |          |          | 2.273182 |          |
| NDUFS1  |          |          |          |          | 2.272472 |
| COG4    |          |          |          |          | 2.25602  |
| CD81    |          |          |          |          | 2.252493 |
| SNRPA1  |          |          |          |          | 2.251942 |
| AP1B1   |          |          |          |          | 2.245849 |
| PIN1    |          |          |          |          | 2.243164 |
| ATP2B1  | 2.2214   |          |          |          |          |
| ATP2B2  | 2.2214   |          |          |          |          |
| USP7    |          |          |          |          | 2.218452 |
| VRK1    |          |          |          |          | 2.202423 |
| DYNLRB2 |          |          |          | 2.199424 |          |
| HDLBP   | 2.182006 |          |          |          |          |
| HSD17B4 |          |          |          | 2.179785 |          |
| DAZAP1  |          |          |          |          | 2.177688 |
| PLCG1   |          |          |          |          | 2.175216 |
| PSMD10  |          |          |          |          | 2.170099 |
| LSM14A  |          |          |          |          | 2.166069 |
| SRRM2   |          |          |          |          | 2.162365 |
| FAR1    |          |          | 2.145449 |          |          |
| YTHDF1  |          |          |          | 2.142943 |          |
| ECH1    |          |          |          | 2.104344 |          |
| SAFB    |          |          |          | 2.082201 |          |
| QARS    |          |          |          |          | 2.080461 |
| CPT1A   |          |          |          |          | 2.078497 |
| INCENP  |          |          |          | 2.078357 |          |
| CNPY2   |          |          |          |          | 2.077709 |

|             |          |  |          |          |          |
|-------------|----------|--|----------|----------|----------|
| HIST3H3     |          |  |          | 2.064585 |          |
| EXOSC2      |          |  | 2.015669 |          |          |
| DCTPP1      |          |  |          |          | 2.0143   |
| TMEM180     |          |  |          | 2.013901 |          |
| NUP93       |          |  |          |          | 2.008665 |
| MIF         | 1.998038 |  |          |          |          |
| RPS11       | 1.943748 |  |          |          |          |
| POLR2A      | -1.90671 |  |          |          |          |
| RRP9        | -1.94133 |  |          |          |          |
| PHF3        |          |  | -1.95916 |          |          |
| ELF2        |          |  | -1.96661 |          |          |
| TBL3        |          |  |          |          | -2.00497 |
| EIF3L       |          |  |          | -2.00574 |          |
| SPCS1       | -2.00694 |  |          |          |          |
| RNF214      |          |  |          | -2.01206 |          |
| PRPH        | -2.01223 |  |          |          |          |
| THOP1       |          |  |          | -2.01548 |          |
| LRRFIP1     |          |  |          | -2.01838 |          |
| EMG1        | -2.02582 |  |          |          |          |
| QRSL1       |          |  |          |          | -2.02698 |
| ELAC2       |          |  | -2.02737 |          |          |
| ATP1A1      | -2.03129 |  |          |          |          |
| FAM49B      |          |  |          | -2.03267 |          |
| CTNND1      |          |  |          |          | -2.04058 |
| ASCC2       |          |  |          |          | -2.0573  |
| DDX6        | -2.09014 |  |          |          |          |
| DLST        | -2.11282 |  |          |          |          |
| KIF2C       |          |  |          |          | -2.13493 |
| NCBP1       |          |  |          | -2.14255 |          |
| DDX23       | -2.14659 |  |          |          |          |
| TES         |          |  |          | -2.1584  |          |
| GIGYF2      |          |  |          |          | -2.16514 |
| LETM1       |          |  |          | -2.17562 |          |
| NUP98       |          |  |          |          | -2.18152 |
| SLC25A5     |          |  |          |          | -2.18192 |
| ANXA4       |          |  |          | -2.19009 |          |
| CORO7-PAM16 | -2.19195 |  |          |          |          |
| UTP20       |          |  |          |          | -2.19909 |
| MRPS11      |          |  |          |          | -2.22264 |
| WFS1        |          |  |          |          | -2.22819 |
| TARS2       |          |  |          |          | -2.23184 |
| CRLF3       |          |  |          | -2.25463 |          |
| TSPAN6      |          |  | -2.25644 |          |          |
| ATP6V1D     |          |  |          | -2.26013 |          |
| FKBP10      |          |  |          |          | -2.26224 |

|             |          |          |          |          |          |
|-------------|----------|----------|----------|----------|----------|
| TIMM22      |          |          |          | -2.26711 |          |
| SLAIN1      |          |          |          |          | -2.26935 |
| NUP153      |          |          |          |          | -2.27023 |
| POLR2H      | -2.29213 |          |          |          |          |
| CALD1       |          |          |          | -2.29589 |          |
| RPS19       |          |          | -2.30321 |          |          |
| EXOSC5      |          |          |          | -2.33523 |          |
| NSDHL       |          |          |          |          | -2.33696 |
| THOC1       |          |          |          |          | -2.34316 |
| TMED10      | -2.37024 |          |          |          |          |
| ANAPC10     |          |          |          | -2.37431 |          |
| MRPL49      |          |          |          | -2.37574 |          |
| KIF21B      |          |          |          |          | -2.37699 |
| CALCOCO2    |          |          |          |          | -2.37972 |
| TST         |          |          |          |          | -2.40344 |
| NCOA5       |          |          |          |          | -2.40799 |
| RPL36A      |          |          |          |          | -2.41674 |
| NOMO1       |          |          |          |          | -2.41687 |
| C7orf55     |          |          |          | -2.42772 |          |
| RFC3        |          |          |          |          | -2.43529 |
| MCM5        |          |          |          |          | -2.44096 |
| RBM28       |          |          |          | -2.44588 |          |
| VPS33A      |          |          |          | -2.44632 |          |
| PDIP46      |          |          |          | -2.44674 |          |
| TIAL1       |          |          |          |          | -2.45179 |
| NDUFV2      |          |          |          |          | -2.45188 |
| LPCAT1      |          |          | -2.47489 |          |          |
| ACTBL2      |          |          |          | -2.47568 |          |
| IDH1        |          |          |          |          | -2.48114 |
| BAG6        |          |          |          |          | -2.4849  |
| ACTB        |          |          |          |          | -2.48538 |
| PGD         |          |          |          |          | -2.48798 |
| GPX1        |          |          |          | -2.49268 |          |
| UBXN4       |          |          |          |          | -2.49551 |
| ZC3HAV1     |          |          |          | -2.502   |          |
| FAF2        | -2.50296 |          |          |          |          |
| RRP1B       |          |          |          | -2.5031  |          |
| SMARCE1     | -2.51099 |          |          |          |          |
| CYFIP1      |          |          | -2.51274 |          |          |
| GALK1       |          |          | -2.51655 |          |          |
| RALA        | -2.5187  |          |          |          |          |
| KTN1        |          |          |          |          | -2.52017 |
| ARPC4-TTLL3 |          | -2.52035 |          |          |          |
| SLC1A5      |          |          |          |          | -2.52232 |
| SSU72       |          |          | -2.53683 |          |          |

|                |          |          |          |          |          |
|----------------|----------|----------|----------|----------|----------|
| NEDD8-MDP1     |          | -2.54069 |          |          |          |
| GATAD2A        | -2.54238 |          |          |          |          |
| UBAP2L         |          |          |          | -2.54363 |          |
| PRPSAP1        |          | -2.5483  |          |          |          |
| B2M            |          |          |          |          | -2.5549  |
| NUDCD1         | -2.55761 |          |          |          |          |
| SFN            |          |          | -2.56022 |          |          |
| GLUD1          |          |          |          |          | -2.56539 |
| PRKDC          |          |          | -2.57109 |          |          |
| KPNA1          |          |          | -2.5723  |          |          |
| EEA1           |          |          | -2.57585 |          |          |
| DKFZp781M17165 |          |          |          | -2.57858 |          |
| PPP2R4         |          |          |          | -2.57858 |          |
| SRRM1          |          |          | -2.58833 |          |          |
| EIF3I          |          |          | -2.59065 |          |          |
| CSNK1E         |          |          |          |          | -2.59152 |
| SLC25A4        |          |          |          |          | -2.59165 |
| CSNK1A1L       |          |          |          | -2.59422 |          |
| URB1           |          | -2.59711 |          |          |          |
| GAR1           | -2.59725 |          |          |          |          |
| CBR4           |          | -2.60098 |          |          |          |
| XPO7           | -2.61021 |          |          |          |          |
| RBBP5          |          |          | -2.61193 |          |          |
| EPS15L1        |          |          |          | -2.61561 |          |
| TBC1D5         |          |          | -2.62504 |          |          |
| G3BP1          |          | -2.62567 |          |          |          |
| SMNDC1         |          | -2.64804 |          |          |          |
| MTHFD2         | -2.65982 |          |          |          |          |
| NCKAP1         |          | -2.67451 |          |          |          |
| MTX2           | -2.68509 |          |          |          |          |
| LUC7L3         |          | -2.68672 |          |          |          |
| DHX40          |          | -2.69857 |          |          |          |
| NOL7           |          |          | -2.70032 |          |          |
| DKFZp586F0420  |          |          |          |          | -2.7083  |
| TOMM40         |          |          |          |          | -2.70984 |
| ANKFY1         |          |          |          |          | -2.7113  |
| PLOD1          |          |          |          |          | -2.72175 |
| GSTO1          |          |          | -2.72243 |          |          |
| RPL6           |          | -2.73123 |          |          |          |
| NPM3           |          | -2.73259 |          |          |          |
| LEPRE1         |          |          |          |          | -2.73301 |
| P3H1           |          |          |          |          | -2.73301 |
| SEC23A         |          |          |          |          | -2.73867 |
| B4GAT1         |          |          |          |          | -2.74096 |
| BSG            | -2.74244 |          |          |          |          |

|          |          |          |          |          |          |
|----------|----------|----------|----------|----------|----------|
| PPP1CB   |          |          |          |          | -2.75565 |
| PPP2R1A  |          |          |          |          | -2.76007 |
| ZC3H18   |          |          | -2.76245 |          |          |
| UBA52    | -2.76689 |          |          |          |          |
| ERH      |          | -2.77274 |          |          |          |
| ABCC4    |          | -2.77553 |          |          |          |
| MOB1A    | -2.77684 |          |          |          |          |
| MOB1B    | -2.77684 |          |          |          |          |
| VBP1     |          |          | -2.77699 |          |          |
| ACSL4    |          |          |          |          | -2.79607 |
| ZC3H4    |          |          |          |          | -2.79999 |
| HOGA1    |          |          |          |          | -2.80046 |
| SMC1A    |          | -2.80695 |          |          |          |
| PYGM     |          |          |          | -2.81144 |          |
| DSTN     |          |          |          |          | -2.81499 |
| A2M      |          | -2.82526 |          |          |          |
| CHAF1A   |          |          |          | -2.82699 |          |
| EXOSC9   |          |          | -2.83629 |          |          |
| PVR      |          |          | -2.83681 |          |          |
| ATF1     |          |          | -2.84754 |          |          |
| CREB1    |          |          | -2.84754 |          |          |
| CREM     |          |          | -2.84754 |          |          |
| MTA1     | -2.8531  |          |          |          |          |
| BRD8     |          |          | -2.86177 |          |          |
| ATAD3C   |          |          | -2.86274 |          |          |
| SPEN     |          |          |          |          | -2.86463 |
| ZC3H11A  | -2.87425 |          |          |          |          |
| BCKDHA   |          |          |          |          | -2.87448 |
| DDHD2    |          |          |          |          | -2.87826 |
| NUP50    |          |          |          |          | -2.87898 |
| WTAP     |          |          |          |          | -2.87976 |
| KIF21A   |          |          |          |          | -2.88117 |
| EMD      | -2.89008 |          |          |          |          |
| ITM2B    |          |          |          |          | -2.90677 |
| GTPBP4   |          |          |          | -2.91561 |          |
| DDX3X    |          |          | -2.91939 |          |          |
| CPSF1    |          |          |          | -2.92307 |          |
| HK2      |          |          | -2.92789 |          |          |
| SLC4A1AP | -2.93603 |          |          |          |          |
| RNASET2  |          |          |          | -2.95704 |          |
| FIP1L1   |          |          | -2.95753 |          |          |
| ETFB     |          |          | -2.96427 |          |          |
| BOP1     |          |          | -2.96629 |          |          |
| PSMB3    |          |          | -2.98889 |          |          |
| BAG2     |          |          |          | -3.00946 |          |

|          |          |          |          |          |          |
|----------|----------|----------|----------|----------|----------|
| XPC      |          | -3.01683 |          |          |          |
| MCTS1    | -3.03121 |          |          |          |          |
| PHF5A    |          | -3.03547 |          |          |          |
| METTTL2A |          | -3.04348 |          |          |          |
| METTTL2B |          | -3.04348 |          |          |          |
| HM13     |          | -3.09827 |          |          |          |
| VPS36    |          | -3.10364 |          |          |          |
| SRSF7    |          | -3.10382 |          |          |          |
| ALB      |          |          | -3.14938 |          |          |
| RAB8A    |          |          |          |          | -3.16979 |
| TOP1MT   |          |          |          | -3.1833  |          |
| CSRP2    | -3.19154 |          |          |          |          |
| GNB2     |          | -3.19418 |          |          |          |
| CKAP2    |          |          |          |          | -3.19921 |
| SNX27    |          |          |          |          | -3.20037 |
| CD3EAP   | -3.22076 |          |          |          |          |
| TMEM165  |          | -3.28377 |          |          |          |
| SCO2     | -3.28888 |          |          |          |          |
| XRCC1    |          | -3.29197 |          |          |          |
| ACTR3    | -3.30561 |          |          |          |          |
| SMC2     |          |          | -3.31502 |          |          |
| ACTN2    |          |          |          | -3.32098 |          |
| PELP1    | -3.34478 |          |          |          |          |
| PHF23    |          |          | -3.35671 |          |          |
| ACO2     |          |          |          |          | -3.35981 |
| PSIP1    | -3.36559 |          |          |          |          |
| ADCK3    |          |          |          |          | -3.38591 |
| COA4     |          |          |          |          | -3.42305 |
| MRPL44   |          |          |          | -3.43332 |          |
| LMNB2    |          |          |          |          | -3.4507  |
| DDX24    |          |          |          | -3.45925 |          |
| CDC27    |          |          |          |          | -3.48359 |
| COIL     |          |          |          | -3.48631 |          |
| TBRG4    |          |          |          |          | -3.48968 |
| CSRP2    |          |          | -3.53224 |          |          |
| TCEB1    |          | -3.54127 |          |          |          |
| HINT2    |          | -3.58548 |          |          |          |
| FHL1     |          |          |          |          | -3.58849 |
| RPN1     |          |          | -3.62885 |          |          |
| VHL      |          |          |          |          | -3.66072 |
| CORO1C   |          |          | -3.67221 |          |          |
| FAM208A  |          | -3.74553 |          |          |          |
| SRSF11   |          | -3.76632 |          |          |          |
| NSMCE2   |          |          |          |          | -3.80838 |
| DHFR     |          |          |          |          | -3.80918 |

|          |          |          |          |          |          |
|----------|----------|----------|----------|----------|----------|
| CCDC51   |          |          |          | -3.81064 |          |
| PRPF4    |          |          |          | -3.8113  |          |
| KIAA1143 |          | -3.81667 |          |          |          |
| AARSD1   |          | -3.91463 |          |          |          |
| RBM10    |          |          |          |          | -3.92664 |
| CTAGE15  |          |          |          |          | -3.96682 |
| CTAGE5   |          |          |          |          | -3.96682 |
| CTAGE6   |          |          |          |          | -3.96682 |
| RPL31    |          |          | -4.00043 |          |          |
| PTMS     | -4.00092 |          |          |          |          |
| DDX39A   | -4.00151 |          |          |          |          |
| APP      |          |          | -4.00934 |          |          |
| GNL2     | -4.0141  |          |          |          |          |
| TOMM70A  | -4.03567 |          |          |          |          |
| AMOTL1   |          |          | -4.04102 |          |          |
| AMOTL2   |          |          | -4.04102 |          |          |
| LDHC     |          |          | -4.04382 |          |          |
| MRPL22   |          |          |          | -4.05526 |          |
| GIPC1    | -4.06366 |          |          |          |          |
| ATP1A4   |          |          |          |          | -4.06888 |
| HSP90B2P | -4.07171 |          |          |          |          |
| CDC20    | -4.07679 |          |          |          |          |
| ISYNA1   |          | -4.08311 |          |          |          |
| C11orf98 | -4.09917 |          |          |          |          |
| CHEK1    |          |          | -4.10878 |          |          |
| FAM3C    |          |          |          | -4.13548 |          |
| POLDIP2  |          |          | -4.14988 |          |          |
| DDX50    | -4.15282 |          |          |          |          |
| CTNNA1   |          |          |          |          | -4.15357 |
| SBNO2    | -4.16216 |          |          |          |          |
| 40787    | -4.17009 |          |          |          |          |
| SCAMP1   | -1.95537 |          | -2.21884 |          |          |
| ME3      |          |          | -4.18445 |          |          |
| SEC23B   | -4.18458 |          |          |          |          |
| SLC25A14 |          |          |          | -4.18671 |          |
| PTTG1IP  |          |          |          | -4.1882  |          |
| TFRC     | -4.18854 |          |          |          |          |
| PRKAR1A  |          |          | -4.19298 |          |          |
| DES      | -2.06782 |          |          |          | -2.13424 |
| TSFM     |          |          | -4.20755 |          |          |
| KIF2A    |          |          |          | -4.21976 |          |
| PYGL     |          |          |          | -4.2291  |          |
| U2AF1    | -4.24577 |          |          |          |          |
| SUCLG2   |          |          |          |          | -4.24647 |
| AHSA1    |          |          | -2.17585 | -2.08002 |          |



|          |          |          |          |          |          |
|----------|----------|----------|----------|----------|----------|
| AP2B1    |          |          | -2.1287  | -2.13341 |          |
| PEX19    |          |          | -4.26432 |          |          |
| CPT2     |          |          |          |          | -4.26801 |
| MCL1     | -4.27492 |          |          |          |          |
| CHMP1A   |          |          | -4.27688 |          |          |
| ALDH18A1 | -2.34246 |          | -1.93961 |          |          |
| DYNC1I2  | -4.2873  |          |          |          |          |
| HELLS    |          |          | -4.28862 |          |          |
| CEP41    | -4.30699 |          |          |          |          |
| VDAC2    | -4.32491 |          |          |          |          |
| PPP1R12A |          |          | -4.32976 |          |          |
| UFD1L    |          |          | -4.36121 |          |          |
| TIMM8B   |          | -4.36722 |          |          |          |
| APIP     |          |          |          | -4.36831 |          |
| CTBP1    |          |          |          | -2.21661 | -2.15835 |
| YME1L1   |          |          |          | -4.38153 |          |
| ANAPC5   | -4.38424 |          |          |          |          |
| SBNO1    | -4.38726 |          |          |          |          |
| PFKP     | -4.39641 |          |          |          |          |
| INTS7    | -4.39934 |          |          |          |          |
| P4HA1    |          |          | -1.9399  | -2.46303 |          |
| MRPL55   |          |          |          |          | -4.40429 |
| CCAR1    | -4.41444 |          |          |          |          |
| MGME1    | -4.4175  |          |          |          |          |
| COIL     |          | -4.41916 |          |          |          |
| RAF1     |          |          |          | -2.20154 | -2.22375 |
| GLOD4    |          |          | -4.45037 |          |          |
| PSMD4    | -4.45316 |          |          |          |          |
| SDAD1    | -4.46135 |          |          |          |          |
| URB2     | -4.4795  |          |          |          |          |
| SND1     |          | -4.48951 |          |          |          |
| OSGEP    |          | -2.38376 |          | -2.12675 |          |
| CLASP1   |          |          | -4.54792 |          |          |
| GIN51    | -4.55183 |          |          |          |          |
| TPM3     |          |          | -4.55812 |          |          |
| ALCAM    |          |          |          | -4.55926 |          |
| GALM     |          |          | -4.58792 |          |          |
| PPIG     | -4.60977 |          |          |          |          |
| TIMM9    |          |          |          | -4.62171 |          |
| IST1     | -4.64282 |          |          |          |          |
| RABAC1   |          | -4.64624 |          |          |          |
| TMEM109  |          | -4.65048 |          |          |          |
| GRN      | -1.93226 |          |          | -2.72064 |          |
| PRKCSH   | -2.0408  | -2.62216 |          |          |          |
| DPP9     |          |          | -4.66818 |          |          |

|          |          |          |          |          |          |
|----------|----------|----------|----------|----------|----------|
| UBR4     |          | -2.40717 |          | -2.26954 |          |
| HGS      |          |          | -4.68167 |          |          |
| HCCS     | -2.64036 |          | -2.04258 |          |          |
| POLR3C   |          |          | -4.69821 |          |          |
| NDUFS7   | -4.72753 |          |          |          |          |
| CSNK1A1  |          |          |          | -2.59422 | -2.13942 |
| MTDH     |          | -4.74009 |          |          |          |
| CSNK2A2  |          |          | -4.75809 |          |          |
| MRPL46   |          |          |          |          | -4.76571 |
| HAT1     |          |          | -4.77386 |          |          |
| PDXK     |          |          | -2.16858 | -2.61168 |          |
| NDUFB9   |          | -4.7867  |          |          |          |
| RRAS2    |          |          | -4.79039 |          |          |
| HDAC3    |          |          | -4.79266 |          |          |
| SRRT     |          | -2.5251  |          | -2.26863 |          |
| NUDT19   | -4.80841 |          |          |          |          |
| LIMA1    |          |          |          |          | -4.82222 |
| TOR1AIP1 |          |          |          |          | -4.8235  |
| MRPL45   |          |          |          | -4.84161 |          |
| HEBP1    |          |          | -4.84271 |          |          |
| CDK9     | -2.35325 |          | -2.50953 |          |          |
| UTS2     | -4.86828 |          |          |          |          |
| VIM      | -1.97153 |          | -2.89892 |          |          |
| HOOK1    | -4.8726  |          |          |          |          |
| OGT      |          | -4.8779  |          |          |          |
| EXOSC10  | -4.87928 |          |          |          |          |
| MKLN1    |          |          | -4.88329 |          |          |
| FAH      |          |          | -4.88911 |          |          |
| ZNF330   | -4.89762 |          |          |          |          |
| NCAPH    |          |          | -2.64633 |          | -2.25893 |
| TPM1     |          |          | -4.91627 |          |          |
| MYEF2    |          |          |          |          | -4.92664 |
| MRPS25   |          | -2.49322 |          |          | -2.43349 |
| DIAPH1   | -4.92733 |          |          |          |          |
| GLRX5    |          |          | -4.92775 |          |          |
| RUFY2    |          |          |          | -4.93085 |          |
| RUFY3    |          |          |          | -4.93085 |          |
| SCPEP1   |          |          | -2.0222  | -2.919   |          |
| PSMD13   |          |          | -4.94403 |          |          |
| NEDD8    |          | -2.54069 |          |          | -2.41709 |
| EIF2B3   |          | -4.97185 |          |          |          |
| SLC25A1  | -2.87684 |          |          |          | -2.09547 |
| GMPPA    | -4.97451 |          |          |          |          |
| CTR9     |          | -2.52744 |          |          | -2.44747 |
| SNRPB    | -4.98612 |          |          |          |          |

|           |          |          |          |          |          |
|-----------|----------|----------|----------|----------|----------|
| SNRPN     | -4.98612 |          |          |          |          |
| ARFGAP1   |          |          |          | -2.38236 | -2.61909 |
| ZNF768    |          | -2.43029 |          | -2.57303 |          |
| MTPAP     | -5.01812 |          |          |          |          |
| KIAA0101  |          |          | -5.01831 |          |          |
| SUPT5H    | -2.54841 |          |          | -2.47286 |          |
| POLB      |          |          | -5.02295 |          |          |
| GART      | -5.05008 |          |          |          |          |
| OCLN      |          | -5.05016 |          |          |          |
| FARSA     |          | -2.86129 |          |          | -2.18969 |
| TBL1X     |          |          | -5.05216 |          |          |
| TBL1XR1   |          |          | -5.05216 |          |          |
| TBL1Y     |          |          | -5.05216 |          |          |
| MCAT      |          |          | -5.05467 |          |          |
| NFXL1     |          |          | -5.05917 |          |          |
| MTMR1     |          |          |          | -2.72771 | -2.3331  |
| CENPV     | -2.31943 |          |          |          | -2.74146 |
| NUDT4     |          |          | -5.06622 |          |          |
| PDS5A     | -5.08281 |          |          |          |          |
| APEH      | -5.10136 |          |          |          |          |
| DUSP3     | -5.10333 |          |          |          |          |
| SAAL1     | -2.53843 |          | -2.56563 |          |          |
| DVL2      |          |          | -5.13101 |          |          |
| DVL3      |          |          | -5.13101 |          |          |
| ACTN4     |          | -2.51537 |          | -2.62115 |          |
| NUCB1     | -3.13268 |          |          | -2.01113 |          |
| PGM3      | -5.15662 |          |          |          |          |
| DIEXF     |          |          |          | -2.99869 | -2.15878 |
| ACTR3B    | -5.15805 |          |          |          |          |
| RAC2      | -5.16093 |          |          |          |          |
| RHOJ      | -5.16093 |          |          |          |          |
| RHOQ      | -5.16093 |          |          |          |          |
| TTBK1     |          |          | -2.73219 |          | -2.4291  |
| PSMA4     |          |          | -5.16813 |          |          |
| GMFB      | -5.18809 |          |          |          |          |
| NCAPH2    |          |          | -5.18919 |          |          |
| CAMK2D    | -5.1999  |          |          |          |          |
| BCAT2     |          |          | -5.20512 |          |          |
| MMTAG2    | -2.63378 | -2.57421 |          |          |          |
| C14orf166 |          |          | -5.2139  |          |          |
| CASP3     | -5.2245  |          |          |          |          |
| USP47     |          | -2.74068 |          | -2.49127 |          |
| HDDC2     |          |          | -5.23952 |          |          |
| NSF       |          |          | -2.13943 | -3.1204  |          |
| PAPOLA    |          |          | -5.26077 |          |          |

|                   |          |          |          |          |          |
|-------------------|----------|----------|----------|----------|----------|
| ENY2              |          |          |          | -2.49698 | -2.76663 |
| MSH6              |          | -2.55731 | -2.70879 |          |          |
| 36951             |          | -5.27676 |          |          |          |
| 37316             |          | -5.27676 |          |          |          |
| CSNK2B-LY6G5B-562 |          | -2.74885 |          |          | -2.53074 |
| SKIV2L2           | -5.28725 |          |          |          |          |
| WDR6              |          | -5.30028 |          |          |          |
| CHP1              |          |          |          |          | -5.3125  |
| GRK6              |          |          | -2.68347 |          | -2.63429 |
| CRYZL1            | -5.3252  |          |          |          |          |
| LSS               |          | -5.32797 |          |          |          |
| SPC24             | -5.33438 |          |          |          |          |
| ATP6V1H           |          |          | -5.33967 |          |          |
| PRPS2             |          |          | -5.34061 |          |          |
| ANXA5             |          | -2.68438 |          | -2.65887 |          |
| SRP54             |          |          | -2.80602 |          | -2.55618 |
| NUP155            | -2.49249 | -2.87403 |          |          |          |
| COPS3             |          |          | -5.36776 |          |          |
| TBC1D15           |          |          | -5.3761  |          |          |
| ACOT1             |          | -5.37735 |          |          |          |
| ACOT2             |          | -5.37735 |          |          |          |
| DDX52             |          | -2.32631 |          |          | -3.06498 |
| ADO               | -2.57567 |          | -2.82383 |          |          |
| KIF4B             |          |          |          | -2.58796 | -2.82035 |
| C9orf78           |          | -3.05708 |          | -2.35182 |          |
| GPN1              |          | -2.66698 | -2.74539 |          |          |
| AMPD2             |          |          | -5.41338 |          |          |
| DKFZp566H1924     |          |          |          | -5.41626 |          |
| NPTN              |          |          |          | -5.41626 |          |
| WHSC1             |          |          | -5.41773 |          |          |
| RAB11A            |          |          | -5.42546 |          |          |
| RAB11B            |          |          | -5.42546 |          |          |
| AP3S1             | -5.43045 |          |          |          |          |
| HSD17B10          |          |          | -2.03831 |          | -3.39934 |
| ARHGDIA           |          |          |          |          | -5.44885 |
| PYGB              |          | -2.63965 |          | -2.81144 |          |
| MSH6              |          |          | -5.45158 |          |          |
| HECTD1            |          |          | -5.46885 |          |          |
| CTSD              | -2.50926 |          |          |          | -2.96246 |
| BABAM1            |          |          | -5.48066 |          |          |
| PSMD2             | -2.70799 |          | -2.77287 |          |          |
| C1orf158          |          |          | -5.48694 |          |          |
| DIDO1             |          |          | -2.9561  | -2.54441 |          |
| RPF2              |          | -3.24805 |          | -2.26113 |          |
| CRELD2            |          | -5.51571 |          |          |          |

|          |          |          |          |          |          |
|----------|----------|----------|----------|----------|----------|
| SCAF4    | -3.03332 | -2.49679 |          |          |          |
| GLMN     |          |          | -5.5456  |          |          |
| SCML2    |          | -2.89512 |          |          | -2.65573 |
| SNW1     | -5.55327 |          |          |          |          |
| PPID     |          |          | -5.55908 |          |          |
| LMAN1    |          | -3.12265 |          | -2.44027 |          |
| UBA52    |          | -2.88389 | -2.68362 |          |          |
| HRNR     |          | -3.25155 |          | -2.31803 |          |
| LARP4B   |          |          | -5.5754  |          |          |
| SERF2    |          |          | -5.57885 |          |          |
| RGS10    |          |          | -5.58081 |          |          |
| GPS1     | -5.58318 |          |          |          |          |
| PURA     |          |          | -5.59138 |          |          |
| CD99     |          |          | -5.59922 |          |          |
| ATP5O    |          |          |          | -2.62852 | -2.99906 |
| UBE2O    |          |          | -5.63428 |          |          |
| VASP     |          |          | -5.6392  |          |          |
| LSM8     |          |          | -5.66161 |          |          |
| TFIP11   |          | -3.01145 |          |          | -2.65848 |
| ANXA7    | -3.08853 | -2.58288 |          |          |          |
| C12orf43 |          |          | -3.41539 |          | -2.26267 |
| SAE1     |          |          |          | -2.42343 | -3.25611 |
| ADI1     | -2.88167 | -2.80455 |          |          |          |
| TOR1AIP2 | -2.49563 |          |          |          | -3.19497 |
| ERP29    |          |          | -2.98785 |          | -2.76059 |
| CKMT1A   | -3.70592 |          |          |          | -2.05393 |
| COX15    |          |          | -5.76344 |          |          |
| CNBP     |          |          | -5.76744 |          |          |
| FN3KRP   |          |          |          | -5.77284 |          |
| RDX      | -5.77313 |          |          |          |          |
| LDHAL6A  |          | -3.01609 |          |          | -2.76126 |
| SRA1     |          |          | -5.79546 |          |          |
| NLE1     |          |          | -5.80896 |          |          |
| NFU1     |          | -5.81277 |          |          |          |
| C19orf43 |          |          | -5.83286 |          |          |
| POLDIP3  |          | -3.22718 |          | -2.60937 |          |
| SLC16A1  |          | -5.86328 |          |          |          |
| AP1M2    |          | -2.68188 |          |          | -3.19183 |
| GAA      |          |          | -2.74431 |          | -3.16274 |
| FAM162A  |          |          |          | -5.92341 |          |
| KIAA0368 |          |          | -5.9256  |          |          |
| SNRPD2   |          |          | -5.92684 |          |          |
| GHITM    |          |          |          | -5.94979 |          |
| DNAJC11  |          | -5.96185 |          |          |          |
| CKMT2    |          | -3.43358 |          |          | -2.52996 |

|         |          |          |          |          |          |
|---------|----------|----------|----------|----------|----------|
| TP53    |          | -3.78882 |          | -2.19434 |          |
| EZH2    |          |          |          | -6.07954 |          |
| PRRC2A  | -2.74735 |          | -3.3375  |          |          |
| SMS     |          |          |          | -6.09146 |          |
| PSMA6   |          | -6.12638 |          |          |          |
| FDXR    |          |          | -6.12944 |          |          |
| MYBBP1A | -2.88105 |          | -3.26175 |          |          |
| POLR2E  | -2.66165 |          |          |          | -3.49717 |
| TMED2   |          |          |          |          | -6.16416 |
| PTBP2   | -6.16541 |          |          |          |          |
| SRPR    | -4.18327 |          | -1.99172 |          |          |
| PANK4   |          | -3.28267 |          | -2.89746 |          |
| MANF    | -3.84208 |          | -2.3511  |          |          |
| MRPS5   |          |          |          | -6.19374 |          |
| MECR    |          | -6.19564 |          |          |          |
| TMEM33  |          |          | -6.21424 |          |          |
| DLD     |          | -6.25146 |          |          |          |
| H2AFY   |          | -3.15706 |          |          | -3.14491 |
| UTP14A  |          | -2.95243 |          |          | -3.368   |
| MYDGF   | -2.06206 | -4.29725 |          |          |          |
| SYMPK   | -6.37155 |          |          |          |          |
| NUPL1   |          |          | -2.85985 | -3.51822 |          |
| TRMU    |          |          |          | -4.04807 | -2.38451 |
| CORO7   | -4.30313 |          | -2.1347  |          |          |
| TACC3   |          | -2.85518 |          | -3.59112 |          |
| CALU    |          | -6.45784 |          |          |          |
| RBM15   |          |          | -3.20078 |          | -3.26179 |
| RDH13   | -6.4743  |          |          |          |          |
| NCDN    | -4.05425 |          |          |          | -2.48503 |
| SLC7A5  | -4.36013 |          | -2.18399 |          |          |
| NNT     | -6.55029 |          |          |          |          |
| PGRMC2  | -4.35079 | -2.30726 |          |          |          |
| MRPL19  |          | -6.6586  |          |          |          |
| TBCA    | -4.20508 |          |          | -2.45899 |          |
| TIMM23  |          |          |          | -6.76123 |          |
| TIMM23B |          |          |          | -6.76123 |          |
| RBM27   |          |          |          | -2.6355  | -4.12646 |
| ACOT9   |          |          |          | -6.76808 |          |
| VPS36   |          |          |          | -3.30757 | -3.46168 |
| UBE2G2  |          | -3.98902 |          | -2.78618 |          |
| RRBP1   | -4.40824 |          |          | -2.38138 |          |
| CHD1L   | -3.81441 |          |          | -2.99114 |          |
| KAT7    | -2.42405 |          |          | -4.39631 |          |
| RBM15   |          | -3.47773 |          |          | -3.37241 |
| PPFIA1  | -4.48538 |          |          |          | -2.36631 |

|              |          |          |          |          |          |
|--------------|----------|----------|----------|----------|----------|
| MRPS27       | -6.8674  |          |          |          |          |
| C1orf131     |          | -2.68681 | -4.21106 |          |          |
| LBR          | -4.26928 |          |          |          | -2.73026 |
| FOXK2        |          |          | -4.71455 |          | -2.29829 |
| DCI          | -3.33854 |          |          |          | -3.67535 |
| TACO1        |          | -2.93617 |          | -4.08373 |          |
| ZKSCAN4      | -2.231   |          | -2.3353  | -2.45775 |          |
| MAP7D3       |          | -2.45673 |          | -2.35687 | -2.27601 |
| NDRG3        |          |          | -4.13843 | -2.97375 |          |
| PRPF3        | -3.27799 | -3.87481 |          |          |          |
| PWP1         |          | -2.4507  |          | -2.51245 | -2.24038 |
| RBM17        | -3.09798 | -4.10806 |          |          |          |
| NAT10        | -1.99525 |          | -2.89162 | -2.37977 |          |
| GRSF1        | -4.2567  |          | -3.05144 |          |          |
| FOXC2        |          | -2.31858 |          | -2.20095 | -2.85316 |
| FOXG1        |          | -2.31858 |          | -2.20095 | -2.85316 |
| FOXL1        |          | -2.31858 |          | -2.20095 | -2.85316 |
| RTN4         |          | -3.42722 |          |          | -3.94734 |
| THOC5        |          |          |          | -4.16113 | -3.22263 |
| UFL1         | -4.8813  |          |          |          | -2.52436 |
| CLN6         |          | -4.09617 |          |          | -3.35753 |
| ZC3H15       |          |          | -5.55858 |          | -2.01177 |
| CAPN2        | -2.45855 |          | -2.77963 | -2.39984 |          |
| CELF1        |          | -2.73911 |          | -2.27341 | -2.6276  |
| ECI1         | -3.65732 |          |          |          | -3.99413 |
| PNN          |          |          | -4.80563 |          | -2.85968 |
| GFAP         | -2.50661 |          | -2.73219 |          | -2.4291  |
| RPL35A       |          | -2.52438 |          | -2.56121 | -2.59259 |
| SSRP1        |          | -7.67899 |          |          |          |
| DKFZp434D199 | -2.7179  |          | -5.00503 |          |          |
| MDH2         |          | -4.8577  |          |          | -2.87118 |
| COX4I1       | -2.17487 | -2.96579 | -2.59582 |          |          |
| U2SURP       |          | -2.99074 |          | -2.5265  | -2.23401 |
| IMP3         |          | -3.68472 |          |          | -4.09142 |
| TMEM205      |          | -2.86064 |          | -2.63632 | -2.30021 |
| PML          |          | -2.82674 |          | -2.45596 | -2.53436 |
| ATAD3A       |          |          | -3.9017  |          | -3.92545 |
| DCAF16       |          | -2.60806 |          | -3.0766  | -2.1851  |
| ARFGAP3      |          | -2.69574 |          | -2.76914 | -2.41465 |
| KIAA1429     |          |          |          | -3.8027  | -4.09367 |
| LAMP1        |          | -3.77343 | -4.13091 |          |          |
| FTO          |          | -2.94594 |          | -2.62215 | -2.34294 |
| CREBBP       |          |          | -5.27437 |          | -2.66661 |
| EP300        |          |          | -5.27437 |          | -2.66661 |
| RAB33B       |          | -2.92535 |          | -2.85588 | -2.16395 |

|          |          |          |          |          |          |
|----------|----------|----------|----------|----------|----------|
| RAB39A   |          | -2.92535 |          | -2.85588 | -2.16395 |
| RAB39B   |          | -2.92535 |          | -2.85588 | -2.16395 |
| RAB3A    |          | -2.92535 |          | -2.85588 | -2.16395 |
| RAB3C    |          | -2.92535 |          | -2.85588 | -2.16395 |
| ME2      |          | -2.61488 | -2.01857 |          | -3.32052 |
| TRIP4    |          | -2.74188 |          | -2.72748 | -2.49144 |
| OSBP2    | -5.40918 |          |          |          | -2.57241 |
| PPA2     |          |          | -3.93064 |          | -4.05423 |
| LIN28B   |          | -2.53448 | -2.77278 |          | -2.69888 |
| SNX17    |          | -2.58648 |          | -2.83425 | -2.59391 |
| NOP2     | -4.02532 |          | -4.00229 |          |          |
| RBM26    |          | -2.75517 |          | -2.6355  | -2.65193 |
| SLC25A31 | -2.19658 |          | -2.91153 |          | -2.93997 |
| MORF4L2  |          | -2.55699 | -2.89121 |          | -2.61222 |
| MCM4     |          |          | -5.47762 |          | -2.6051  |
| NSUN5P1  |          | -2.62258 |          | -2.66368 | -2.81084 |
| NSUN5P2  |          | -2.62258 |          | -2.66368 | -2.81084 |
| DKC1     | -2.46678 | -2.63244 | -3.00273 |          |          |
| ATP5H    |          |          | -4.38387 | -3.7431  |          |
| EIF4G1   |          |          | -5.75906 |          | -2.36824 |
| GALNT2   |          | -4.19211 |          |          | -3.93557 |
| ZNF629   |          | -2.80244 |          | -2.8021  | -2.55906 |
| C5orf24  |          | -4.25919 |          |          | -3.90998 |
| LIG3     |          | -2.98997 |          | -2.61098 | -2.57777 |
| RPL28    | -4.05301 |          | -4.12877 |          |          |
| MEPCE    |          |          | -5.49277 |          | -2.70672 |
| ESYT2    | -4.70622 |          |          |          | -3.49604 |
| ANXA2    | -4.0969  |          | -4.11251 |          |          |
| SAMM50   |          |          |          | -3.56661 | -4.66721 |
| DNAJB12  | -3.35783 |          | -4.88741 |          |          |
| TRIP6    | -4.20755 |          | -4.03938 |          |          |
| SON      |          | -2.75123 |          | -2.41511 | -3.08456 |
| SPTBN1   |          | -4.44553 |          |          | -3.82598 |
| CDK12    |          |          | -2.66903 | -3.15126 | -2.47049 |
| PPIH     | -4.31308 |          | -4.02571 |          |          |
| EIF5B    | -3.45535 |          |          | -2.43152 | -2.47053 |
| SRPK3    | -4.18494 |          | -4.19158 |          |          |
| RPS19BP1 |          | -4.11694 |          | -4.26478 |          |
| ALDH1B1  |          |          |          | -6.16424 | -2.27336 |
| TSC2     |          | -2.69727 |          | -2.51819 | -3.2389  |
| ASF1B    |          | -2.69315 |          | -3.01432 | -2.7483  |
| ARL2BP   | -4.18843 |          | -4.28252 |          |          |
| SBDS     | -4.29414 |          | -4.18501 |          |          |
| FTH1     | -5.75942 |          |          | -2.72126 |          |
| GSTM2    | -4.19059 |          | -4.29938 |          |          |



|              |          |          |          |          |          |
|--------------|----------|----------|----------|----------|----------|
| GSTM5        | -4.19059 |          | -4.29938 |          |          |
| NKAPL        | -4.29071 |          | -4.20526 |          |          |
| IQGAP3       | -4.29411 |          | -4.20602 |          |          |
| SUMO3        | -4.09943 |          | -4.40691 |          |          |
| HMOX2        | -3.79263 | -2.68123 | -2.03253 |          |          |
| BAZ1A        |          | -3.60975 |          | -2.43816 | -2.47076 |
| NUP62        |          | -3.2391  |          | -2.36404 | -2.92661 |
| PRKAR2A      | -4.4237  |          | -4.10646 |          |          |
| ARG1         |          | -3.17529 |          |          | -5.36024 |
| LUC7L        | -2.83503 | -3.20381 |          |          | -2.52624 |
| H2AFX        |          |          | -5.72369 |          | -2.85438 |
| TARDBP       | -4.3339  |          | -4.27821 |          |          |
| GLS          | -4.19593 |          |          |          | -4.45866 |
| CMAS         | -3.20468 |          | -5.51455 |          |          |
| HSPB1        | -4.54416 |          | -4.20037 |          |          |
| CCNB1        |          | -8.77883 |          |          |          |
| MMS19        | -4.67933 |          | -4.11    |          |          |
| PDIA4        | -4.5461  |          | -4.26975 |          |          |
| 38961        |          | -3.35582 |          | -2.91379 | -2.56173 |
| THYN1        |          |          | -2.58107 | -3.2886  | -2.96259 |
| CBLL1        |          | -2.73404 |          | -3.92555 | -2.17972 |
| XPO6         |          | -3.04183 |          | -3.58472 | -2.21336 |
| RPL37A       | -4.46198 |          | -4.38399 |          |          |
| ARPP19       |          | -3.38029 |          | -3.18593 | -2.33923 |
| AFF1         |          | -5.42578 |          |          | -3.48461 |
| SFXN4        | -4.25723 |          | -4.65462 |          |          |
| SEC61A2      | -4.78279 |          | -4.13156 |          |          |
| CKMT1B       | -3.95736 | -2.91044 |          |          | -2.05393 |
| PABPC1       |          | -2.6125  | -3.46029 |          | -2.85646 |
| FLII         |          | -4.33417 |          |          | -4.6052  |
| RPL8         | -4.67955 |          | -4.26895 |          |          |
| PZP          |          | -3.01686 |          | -3.52433 | -2.44594 |
| DKFZp434B156 | -4.5162  |          | -4.4711  |          |          |
| WDR92        | -4.5162  |          | -4.4711  |          |          |
| LRBA         | -4.64861 |          | -4.36293 |          |          |
| ATP5D        | -4.66927 |          | -4.36929 |          |          |
| SLC25A3      | -5.40573 | -3.64335 |          |          |          |
| RPL36A       | -5.04617 |          | -4.07364 |          |          |
| TPT1P8       | -4.77998 |          | -4.39875 |          |          |
| BCAP31       | -4.67268 |          | -4.50613 |          |          |
| BICD2        | -4.51779 |          | -4.67633 |          |          |
| TRIAP1       |          | -4.18304 |          | -5.03002 |          |
| HARS2        | -4.55522 |          | -4.66192 |          |          |
| ATP5B        | -2.63928 |          | -4.45187 |          | -2.13315 |
| SEC61A1      | -5.1352  |          | -4.13156 |          |          |

|          |          |          |          |          |          |
|----------|----------|----------|----------|----------|----------|
| MRPS7    |          | -5.9757  |          |          | -3.33865 |
| ECHS1    |          | -2.89894 |          | -3.86367 | -2.56153 |
| PCBP2    | -4.77925 |          | -4.556   |          |          |
| NDUFA9   |          |          |          | -5.76442 | -3.57634 |
| WDR3     |          | -3.82924 |          | -3.03418 | -2.49719 |
| VAPB     |          | -3.53373 |          | -3.29584 | -2.54122 |
| USP5     |          | -4.213   | -5.16359 |          |          |
| ZYX      | -4.83593 |          | -4.54926 |          |          |
| SP100    | -4.73354 |          | -4.66319 |          |          |
| RALY     | -2.60518 | -3.67978 | -3.12544 |          |          |
| NEMF     | -4.42756 |          | -5.01646 |          |          |
| PSAP     | -3.34017 |          | -3.71244 | -2.40718 |          |
| AP2A2    | -2.97922 | -3.48256 |          | -3.02029 |          |
| METAP1   | -4.06419 |          | -2.49851 |          | -2.91982 |
| ENAH     | -4.71096 |          |          |          | -4.7803  |
| CDC42    | -2.32122 | -3.98768 |          |          | -3.18881 |
| TNPO1    | -3.24849 | -3.65085 |          | -2.61968 |          |
| HIST1H1C | -6.91493 |          |          |          | -2.60484 |
| TUBB3    | -4.73396 |          | -4.78903 |          |          |
| WARS     | -5.15572 |          | -4.37515 |          |          |
| CD59     | -4.75384 |          | -4.78659 |          |          |
| UBA2     | -4.89314 |          | -4.67893 |          |          |
| PRPF38B  |          | -3.54769 |          | -3.40695 | -2.62022 |
| ARHGEF2  |          | -2.78455 |          | -3.10264 | -3.7023  |
| NAP1L4   | -5.47449 |          | -4.12747 |          |          |
| GPHN     | -5.13424 |          | -4.47534 |          |          |
| SNRNP70  |          |          | -4.55068 | -2.41321 | -2.64592 |
| WDR18    | -5.0344  |          | -4.58206 |          |          |
| UFM1     | -4.89767 |          | -4.76829 |          |          |
| CYP51A1  |          | -3.73038 |          | -5.96196 |          |
| CPVL     |          | -5.4424  |          |          | -4.2537  |
| PBRM1    | -4.78234 |          |          |          | -4.92936 |
| SNRPF    | -5.4403  |          | -4.31862 |          |          |
| RPS23    | -4.84824 |          | -4.92265 |          |          |
| LIN7C    | -2.84649 | -3.059   |          |          | -3.89662 |
| TMA7     | -2.73546 |          |          | -3.1863  | -3.88632 |
| VDAC1    | -2.90308 | -4.83426 | -2.09202 |          |          |
| SFXN1    |          | -4.07149 | -2.53401 | -3.24535 |          |
| PDS5B    | -2.29458 | -3.72636 | -3.83438 |          |          |
| DDX3Y    | -4.87728 |          | -4.9927  |          |          |
| UBAP2    | -5.29387 |          | -4.57933 |          |          |
| DDX4     | -5.38665 |          | -4.50033 |          |          |
| WIZ      | -6.98563 | -2.90547 |          |          |          |
| NQO2     | -4.66075 |          | -5.23061 |          |          |
| SHMT2    |          | -4.88627 | -2.4464  |          | -2.5612  |

|             |          |          |          |          |          |
|-------------|----------|----------|----------|----------|----------|
| RPL37AP8    | -4.81884 |          | -5.08944 |          |          |
| CUL2        | -5.26537 |          | -4.64689 |          |          |
| CHD1        | -4.99269 |          | -4.93317 |          |          |
| CBX1        |          |          |          | -2.85673 | -7.07467 |
| PEF1        | -4.96097 |          | -4.98645 |          |          |
| PSMD9       | -3.35861 |          | -3.03762 | -3.61609 |          |
| UBE2C       | -4.96723 |          | -5.05212 |          |          |
| PSMB7       | -4.99691 |          | -5.02693 |          |          |
| SCRN1       | -3.321   | -3.44747 | -3.26833 |          |          |
| RAD23A      | -4.9263  |          | -5.12115 |          |          |
| ABCF1       | -5.11395 |          | -4.95057 |          |          |
| PRPSAP2     | -5.0134  |          | -5.07188 |          |          |
| IMPDH1      | -5.02296 |          | -5.06672 |          |          |
| PPHLN1      | -6.32944 |          |          | -3.76064 |          |
| AHSG        | -5.48552 |          | -4.61205 |          |          |
| DPYSL5      | -5.00661 |          | -5.10738 |          |          |
| 40057       | -5.05453 |          | -5.06188 |          |          |
| UTP14C      |          | -3.05368 |          | -4.04766 | -3.02347 |
| PMPCA       | -5.08401 |          | -5.04885 |          |          |
| NDUFB11     | -5.03812 |          | -5.10792 |          |          |
| ARPC3       | -4.98152 |          | -5.16532 |          |          |
| HEATR6      |          | -3.60184 |          | -3.18711 | -3.36476 |
| CUL3        | -5.01355 |          | -5.16701 |          |          |
| HUWE1       | -5.18949 |          | -4.9915  |          |          |
| GLA         | -3.52324 |          | -4.1116  | -2.55036 |          |
| PICALM      | -4.98764 |          | -5.20744 |          |          |
| SETBP1      | -3.23814 |          | -2.19544 | -2.43078 | -2.33952 |
| CLTA        | -5.15511 |          | -5.0495  |          |          |
| RCN1        |          | -4.60421 | -5.61306 |          |          |
| RP2         |          | -4.73142 |          | -5.49054 |          |
| PPWD1       |          | -4.07591 |          | -3.85409 | -2.29802 |
| LSM4        | -5.11358 |          | -5.12604 |          |          |
| CAPZA2      | -5.10779 |          | -5.16442 |          |          |
| BMI1        |          | -3.34419 |          | -3.53182 | -3.40366 |
| COMMD3-BMI1 |          | -3.34419 |          | -3.53182 | -3.40366 |
| HCFC2       | -5.11933 |          | -5.17764 |          |          |
| CTBP2       | -5.18113 |          | -5.14157 |          |          |
| 38412       | -5.51515 |          |          |          | -4.82794 |
| C21orf33    |          | -2.84652 |          | -4.76611 | -2.7338  |
| RPL36AL     | -5.08422 |          | -5.26737 |          |          |
| ATXN2       | -5.20544 |          | -5.15133 |          |          |
| SLC25A22    | -4.37147 |          |          | -5.98652 |          |
| NCL         | -5.1951  |          | -5.17527 |          |          |
| EIF4G2      | -5.14859 |          | -5.24274 |          |          |
| NMT1        | -5.19477 |          | -5.20825 |          |          |

|          |          |          |          |          |          |
|----------|----------|----------|----------|----------|----------|
| SNTB2    |          | -3.39082 |          | -3.46232 | -3.55232 |
| CTCF     | -4.34618 | -6.06313 |          |          |          |
| PRPF40A  | -5.10702 |          | -5.30669 |          |          |
| ARF5     | -5.33067 |          | -5.11866 |          |          |
| RAB1B    | -4.18665 |          | -3.00065 |          | -3.28151 |
| FAM175B  |          |          | -5.17507 | -2.74936 | -2.54773 |
| TKT      | -5.18734 |          | -5.29357 |          |          |
| SAP18    | -3.06078 |          | -3.70123 | -3.72727 |          |
| THUMPD3  | -5.17619 |          | -5.33398 |          |          |
| NT5DC1   | -5.17546 |          | -5.34986 |          |          |
| SETDB1   |          | -4.0699  |          | -3.3368  | -3.14468 |
| UBL5     | -5.24881 |          | -5.3062  |          |          |
| STX7     | -5.22226 |          | -5.34347 |          |          |
| GEMIN4   | -5.29151 |          | -5.2825  |          |          |
| HGH1     | -5.36044 |          | -5.21663 |          |          |
| FANCD2   | -4.39534 | -3.39663 |          | -2.78915 |          |
| AGAP3    | -5.16439 |          | -5.42309 |          |          |
| FSCN1    | -5.20616 |          | -5.38437 |          |          |
| EXOSC4   | -5.24928 |          | -5.35449 |          |          |
| AGPS     |          | -2.50917 |          | -4.24536 | -3.85585 |
| RPL30    | -5.276   |          | -5.34641 |          |          |
| WBP2     | -5.15898 |          | -5.48695 |          |          |
| SH3BGRL3 | -5.28028 |          | -5.37256 |          |          |
| HDGFRP2  | -2.58552 |          | -5.47177 |          | -2.60655 |
| ATXN2L   | -5.52365 |          | -5.16924 |          |          |
| ATP6V1C1 | -4.76679 |          | -5.94906 |          |          |
| IDH3G    |          |          |          | -6.39724 | -4.35597 |
| EIF2B4   | -5.3329  |          | -5.46787 |          |          |
| RBX1     | -5.28425 |          | -5.51745 |          |          |
| YY2      | -5.33875 |          | -5.46823 |          |          |
| MOV10    | -5.30182 |          | -5.50666 |          |          |
| PES1     | -5.21455 |          | -5.60867 |          |          |
| YY1      | -5.38705 |          | -5.44456 |          |          |
| STAU2    | -5.36044 |          | -5.47655 |          |          |
| DHX29    | -5.42581 |          | -5.41687 |          |          |
| LMAN2    |          | -2.34893 | -2.28961 | -3.50628 | -2.70462 |
| MPP2     |          | -3.76485 |          | -3.67235 | -3.44247 |
| FKBP8    |          | -3.67032 |          | -4.12437 | -3.09781 |
| GNAI2    |          | -3.16008 |          | -3.74314 | -3.99447 |
| MRPL18   |          | -5.24861 |          | -5.67797 |          |
| PSMA1    | -5.42478 |          | -5.53711 |          |          |
| DNAJB2   | -6.03464 |          |          | -2.38711 | -2.54064 |
| DNAJB8   | -6.03464 |          |          | -2.38711 | -2.54064 |
| TAMM41   |          | -3.36405 |          | -4.66698 | -2.93195 |
| EIF4A3   | -5.44501 |          | -5.51983 |          |          |

|               |          |          |          |          |          |
|---------------|----------|----------|----------|----------|----------|
| PEPD          |          | -2.76497 | -5.4764  |          | -2.75626 |
| CYB5B         |          | -6.36358 | -4.63931 |          |          |
| EIF2D         | -5.40286 |          | -5.60344 |          |          |
| POFUT1        |          |          |          | -5.75475 | -5.26284 |
| NDUFA10       | -3.24752 | -3.60031 |          |          | -4.17017 |
| CHMP4A        | -5.48369 |          | -5.55014 |          |          |
| TCEA2         | -5.39512 |          | -5.65493 |          |          |
| RHOT1         |          | -3.74272 |          | -7.31573 |          |
| SNRPC         | -5.58285 |          | -5.52619 |          |          |
| STUB1         | -3.92477 | -3.73239 |          |          | -3.46567 |
| SAFB2         |          | -3.06912 | -4.60543 | -3.46055 |          |
| FAM136A       |          | -5.23778 | -5.91488 |          |          |
| UBE2M         | -4.24912 | -2.81917 | -4.09508 |          |          |
| EDC3          | -5.48378 |          | -5.68883 |          |          |
| PRRC2C        | -5.58983 |          | -3.01498 |          | -2.65192 |
| PAWR          | -4.58111 |          | -4.45304 |          | -2.26864 |
| GOLGA2        | -2.7806  | -2.51629 | -2.91372 |          | -3.10505 |
| TRAFD1        | -3.98275 | -4.05569 |          | -3.31801 |          |
| GNB1          | -5.49391 |          | -5.87767 |          |          |
| GNB3          | -5.49391 |          | -5.87767 |          |          |
| GNB4          | -5.49391 |          | -5.87767 |          |          |
| ORC3          | -6.17445 | -5.20798 |          |          |          |
| GNS           |          | -3.14873 | -2.4517  | -2.61484 | -3.19029 |
| MRPL12        | -2.38675 | -3.73615 | -2.8855  |          | -2.40367 |
| MCMBP         | -2.62091 | -2.63354 | -3.32203 |          | -2.88382 |
| CHMP2A        |          |          | -8.38675 |          | -3.0744  |
| LONP1         |          | -2.86443 | -4.1874  | -4.44743 |          |
| TIMM44        |          | -2.8853  |          | -4.98545 | -3.66437 |
| BCLAF1        |          | -4.29612 | -2.34998 | -2.75751 | -2.14279 |
| GOSR2         |          | -3.95512 |          | -3.88284 | -3.72695 |
| NOC3L         | -4.32896 |          | -3.1959  | -4.05198 |          |
| PARK7         | -3.00919 | -3.22959 | -2.84157 |          | -2.59614 |
| EPHA1         | -4.15138 |          | -3.58684 |          | -4.03002 |
| SUCLG1        |          | -3.46448 |          | -3.96362 | -4.35338 |
| CNN2          | -6.17768 |          | -5.64357 |          |          |
| PPT1          |          | -3.74877 |          | -4.11602 | -3.96962 |
| KRI1          |          | -4.11759 |          | -4.63576 | -3.09851 |
| MECP2         | -6.18222 | -5.68881 |          |          |          |
| NOL8          | -2.55287 | -2.71579 | -4.00582 |          | -2.62134 |
| NUP35         |          | -5.65169 |          | -6.26674 |          |
| TARS          | -4.72172 |          | -4.6589  |          | -2.54737 |
| DKFZp434B2017 |          |          | -6.64535 | -2.69994 | -2.61401 |
| SAR1B         |          |          | -6.64535 | -2.69994 | -2.61401 |
| RTN3          |          | -4.10978 |          | -4.04689 | -3.82128 |
| C1orf177      |          |          |          | -6.14604 | -5.85764 |

|            |          |          |          |          |          |
|------------|----------|----------|----------|----------|----------|
| COMMD2     | -4.68347 |          | -5.19203 |          | -2.27032 |
| ERGIC1     |          | -3.71089 |          | -4.85396 | -3.58105 |
| TTF2       |          | -4.62721 |          | -4.06148 | -3.55086 |
| TXNL1      | -2.86852 | -2.8697  | -3.61911 |          | -3.0023  |
| AK4        |          | -4.62678 |          | -3.77172 | -3.96586 |
| SCO1       |          | -3.83004 |          | -4.48657 | -4.05078 |
| TMEM9      |          | -3.89816 |          | -3.98584 | -4.49315 |
| TMEM9B     |          | -3.89816 |          | -3.98584 | -4.49315 |
| GFM1       |          | -3.92401 |          | -4.14499 | -4.35653 |
| NDUFAB1    | -5.81197 |          | -6.61624 |          |          |
| TMEM14C    |          |          | -5.22974 | -7.21915 |          |
| HSPE1      | -4.14218 | -5.73122 |          |          | -2.63475 |
| IDH3A      | -5.18459 |          | -3.14165 |          | -4.18567 |
| TMCO1      | -2.56054 |          | -2.36749 | -3.92238 | -3.74188 |
| CSTF3      | -2.3532  | -2.50969 | -3.10436 | -2.30972 | -2.34044 |
| CPSF7      |          | -5.77997 | -4.6965  |          | -2.20088 |
| CALR       | -5.35053 | -2.69299 | -4.64149 |          |          |
| NME1       | -4.43498 | -5.94861 |          | -2.34445 |          |
| PTRH2      |          |          | -8.00107 |          | -4.78209 |
| MCCC2      | -4.84016 |          | -2.54862 |          | -5.47081 |
| APEX1      | -3.33628 | -3.57487 | -3.09678 |          | -2.89609 |
| NDUFA6     |          |          |          | -6.66898 | -6.27734 |
| CDC37      | -7.28916 |          | -5.667   |          |          |
| ACADM      | -4.719   |          | -5.41325 | -2.90126 |          |
| MT1A       | -2.05102 |          | -5.83746 | -2.62587 | -2.52434 |
| MT1H       | -2.05102 |          | -5.83746 | -2.62587 | -2.52434 |
| RPL13      | -5.46717 | -2.58319 | -4.99943 |          |          |
| UBE2Z      | -5.49358 |          | -5.29869 |          | -2.27474 |
| CTTN       | -4.30125 | -3.56782 |          |          | -5.23132 |
| MAP1B      |          | -5.43848 |          | -3.03527 | -4.70315 |
| ADRM1      | -5.33097 |          | -5.4056  |          | -2.47535 |
| ESYT1      |          | -4.79004 |          | -4.37247 | -4.05334 |
| IK         | -3.38961 | -2.64044 |          | -2.52779 | -4.75057 |
| DHRS7B     | -4.58462 |          |          | -4.33758 | -4.38677 |
| UGGT1      | -5.11683 | -2.76358 | -3.05656 |          | -2.46279 |
| HSPE1-MOB4 | -3.23368 | -4.0111  |          | -3.12631 | -3.05904 |
| RAD50      |          | -5.36733 | -2.16348 | -5.91134 |          |
| HMG20A     |          | -4.67572 |          | -4.56977 | -4.19991 |
| CNNM3      | -4.66971 |          | -4.31566 | -2.33552 | -2.15286 |
| RPS3       | -5.34447 |          | -5.48168 |          | -2.67984 |
| BTF3       | -5.36551 |          | -5.44561 | -2.70996 |          |
| MATR3      | -5.40709 |          | -5.56565 |          | -2.56844 |
| PSMD12     | -2.98997 | -2.80551 | -2.71074 | -2.4264  | -2.61373 |
| DHRS7      |          | -4.54783 |          | -4.38014 | -4.70061 |
| MT1E       | -1.90839 |          | -5.72035 | -3.45283 | -2.58518 |

|              |          |          |          |          |          |
|--------------|----------|----------|----------|----------|----------|
| MT1M         | -1.90839 |          | -5.72035 | -3.45283 | -2.58518 |
| JAGN1        |          | -4.53325 |          | -4.08778 | -5.12467 |
| CLPX         |          | -4.63526 |          | -4.93575 | -4.20839 |
| DDX46        | -5.43041 |          | -5.50861 |          | -2.8412  |
| NGDN         |          | -4.45889 |          | -4.68392 | -4.64443 |
| HMOX1        |          | -4.79941 |          | -4.51003 | -4.48586 |
| TFAP4        | -4.22933 | -5.57836 | -4.03547 |          |          |
| PPME1        | -2.64273 |          | -5.17564 | -2.53922 | -3.48733 |
| CPNE1        | -5.57377 |          | -5.46115 |          | -2.86431 |
| MAX          |          | -4.74957 |          | -4.84326 | -4.35054 |
| RFC5         | -5.43826 | -2.47188 |          | -2.7125  | -3.33095 |
| UQCRQ        | -4.28939 | -4.29262 |          |          | -5.44637 |
| TIMM10       | -4.3286  | -3.09454 |          | -3.16109 | -3.49763 |
| UTP15        |          | -4.58118 | -4.53769 | -4.98248 |          |
| TIMM13       |          | -3.68461 |          | -4.36592 | -6.07823 |
| ADNP         |          |          | -4.80324 | -5.01589 | -4.42862 |
| SERPINH1     |          | -4.26912 |          | -4.57537 | -5.41792 |
| SCP2         | -4.91417 | -2.95046 |          | -3.12866 | -3.32114 |
| TXNDC12      | -3.01486 | -6.43455 | -4.87861 |          |          |
| LOC102724023 | -4.06112 | -2.84652 |          | -4.76611 | -2.7338  |
| TPM2         | -8.14504 |          | -6.30169 |          |          |
| PHB2         | -5.1345  | -4.12903 | -5.20613 |          |          |
| AIFM1        | -3.06203 | -5.37535 |          |          | -6.11288 |
| TSFM         | -7.0763  |          | -7.48703 |          |          |
| TBRG4        |          |          | -8.01511 | -6.55018 |          |
| DAD1         |          | -4.53747 |          | -5.35563 | -4.79011 |
| SMARCD2      |          | -2.59053 | -4.82123 | -3.05095 | -4.23525 |
| DNAJC5       | -4.00914 |          | -4.0936  |          | -6.61822 |
| MAVS         | -4.0558  | -5.39016 |          |          | -5.33162 |
| ACTN1        | -3.48866 | -2.7941  | -3.21103 | -2.44676 | -2.9254  |
| MSN          | -2.83167 | -3.36124 | -3.56515 | -2.47958 | -2.64647 |
| ZMYND8       |          | -4.6335  |          | -4.91241 | -5.49429 |
| INIP         | -4.72402 | -5.6999  |          |          | -4.70403 |
| SNRPA        | -5.30764 |          | -5.46036 |          | -4.38323 |
| VDAC3        | -4.53121 | -5.48841 |          |          | -5.14844 |
| ZNF512B      |          | -5.338   |          | -5.09391 | -4.76411 |
| SRP19        | -3.37202 | -3.93829 | -4.89042 |          | -3.15809 |
| PRCP         | -4.76167 |          | -3.354   | -2.67971 | -4.58639 |
| DKFZp586I031 | -4.15888 | -4.361   | -3.68584 |          | -3.20434 |
| RANBP9       | -6.40128 |          | -6.34442 |          | -2.67906 |
| RRP7A        | -4.3798  | -2.91847 | -4.43268 |          | -3.74879 |
| HMGN1        | -3.5904  | -3.4589  | -5.82133 |          | -2.69414 |
| DEK          | -3.77993 | -3.6507  | -3.95312 | -2.04949 | -2.14392 |
| MDN1         |          | -4.54175 | -3.78285 | -3.27771 | -4.18968 |
| SF1          | -5.16805 |          | -5.49349 | -5.18505 |          |

|           |          |          |          |          |          |
|-----------|----------|----------|----------|----------|----------|
| BZW1      | -5.1836  | -2.7509  | -5.3713  |          | -2.63846 |
| ANXA11    | -4.83932 | -6.09241 |          |          | -5.02165 |
| CAP1      | -5.18982 | -3.17587 | -5.08555 | -2.51284 |          |
| IDH2      |          | -4.05946 | -7.86899 | -4.09984 |          |
| PTMA      | -5.602   |          | -5.44764 | -5.03521 |          |
| SNRPB2    |          | -4.62129 | -4.71635 | -2.01677 | -4.7376  |
| SEC62     | -4.54965 | -5.2489  |          | -6.45647 |          |
| RBMX      | -5.33708 | -2.61962 | -5.25035 |          | -3.21317 |
| RPE       | -3.28054 | -3.64313 | -3.82479 | -2.60527 | -3.23376 |
| NAA40     | -5.09673 | -5.35421 |          |          | -6.19277 |
| MT1X      | -2.9782  | -2.78665 | -5.79498 | -2.85535 | -2.26362 |
| MT2A      | -2.9782  | -2.78665 | -5.79498 | -2.85535 | -2.26362 |
| SOD2      | -5.91184 |          | -3.26194 | -5.34618 | -2.19625 |
| GRB2      | -9.16285 |          | -7.65953 |          |          |
| NDUFB6    | -5.42338 | -5.46366 |          |          | -5.98308 |
| NDUFAF4   | -5.72997 |          | -4.83802 | -6.33355 |          |
| ASPH      | -5.77709 |          |          | -5.86088 | -5.28466 |
| MT1G      | -2.9782  | -2.78665 | -5.79498 | -2.85535 | -2.52434 |
| DACH2     |          | -3.80242 | -5.92202 | -3.71579 | -3.65165 |
| ELP2      |          | -5.4057  | -5.79084 | -5.932   |          |
| MTA3      | -6.1469  | -3.67048 |          | -3.38313 | -3.92985 |
| SLC9A3R2  | -4.40207 | -4.60387 |          | -4.32164 | -3.81287 |
| SUB1      | -5.39265 | -3.46832 | -5.5043  |          | -2.87185 |
| SMN2      |          | -4.68197 | -5.42319 | -3.89829 | -3.36153 |
| PLRG1     | -8.04049 | -2.78957 |          | -3.37825 | -3.3182  |
| RRP12     | -5.36632 | -3.05996 | -4.28759 | -2.77763 | -2.16175 |
| SMN1      |          | -4.68197 | -5.42319 | -3.89829 | -3.79806 |
| RSF1      | -6.21257 | -3.85022 |          | -3.97181 | -3.85585 |
| MRPS9     |          | -3.85657 | -5.63076 | -3.95807 | -4.58373 |
| BZW2      | -5.19822 | -3.51046 | -3.67222 | -3.30828 | -2.56986 |
| OCIAD1    |          | -2.57664 | -4.65574 | -6.09395 | -5.08529 |
| HYPK      | -3.71704 | -4.22669 | -4.34784 | -2.91311 | -3.29858 |
| PPP1CB    | -4.02021 | -3.71616 | -4.05608 | -3.04163 | -3.94469 |
| AGK       |          | -4.36255 | -4.83768 | -3.98762 | -5.63657 |
| DDI2      | -5.39539 | -3.08091 | -5.28125 | -2.02811 | -3.08391 |
| APOBEC3C  | -4.1035  | -4.30468 | -3.84372 | -3.01634 | -3.69735 |
| DBN1      |          | -5.63316 | -2.16243 | -6.55343 | -4.70641 |
| SF3A2     | -5.23048 | -2.97988 | -5.14375 | -2.63277 | -3.10627 |
| TLE4      |          | -4.46563 | -5.29177 | -4.7632  | -4.59071 |
| NEFM      | -2.54426 | -3.61926 | -5.20928 | -3.61604 | -4.13612 |
| ATPIF1    | -2.51958 | -3.37858 | -2.92975 | -5.32616 | -5.05754 |
| NKRF      | -3.70094 | -4.08181 | -4.49043 | -3.79031 | -3.15827 |
| REEP5     | -2.59855 | -3.84474 | -3.26312 | -4.27733 | -5.3644  |
| HNRNPM    | -4.6232  |          | -5.89498 | -3.03692 | -5.9222  |
| HEL-S-109 |          | -4.69888 | -4.88773 | -5.72282 | -4.31641 |



|          |          |          |          |          |          |
|----------|----------|----------|----------|----------|----------|
| NUCB2    |          | -4.69888 | -4.88773 | -5.72282 | -4.31641 |
| NDUFA5   | -4.13452 | -4.9973  |          | -5.39188 | -5.12436 |
| RBM3     | -2.81892 | -14.1762 |          | -2.85664 |          |
| HSDL2    | -4.27402 | -3.4536  | -4.56017 | -3.42502 | -4.17366 |
| HAX1     | -4.00028 | -4.31192 |          | -6.11799 | -5.4582  |
| LMAN2L   | -4.01871 |          | -4.91898 | -5.42342 | -5.61509 |
| ATP5F1   | -2.94982 | -5.58179 | -4.8878  |          | -6.55835 |
| CECR5    | -4.88664 | -5.25284 |          | -5.70863 | -4.30323 |
| HMGH4    | -5.96091 | -5.89779 |          | -4.44234 | -3.95113 |
| UBE2D2   |          | -2.62528 | -8.24164 | -2.14884 | -7.38529 |
| COA3     | -5.10828 |          | -5.69513 | -4.55435 | -5.16686 |
| RPL10    | -5.51928 | -3.34035 | -5.69653 | -3.86441 | -2.13874 |
| STMN4    | -4.76667 | -4.16353 | -5.02247 | -3.33121 | -3.44606 |
| PCYOX1   |          | -5.28724 | -4.95108 | -5.72388 | -4.78503 |
| TCOF1    | -5.05379 | -2.69368 | -6.64848 | -3.11296 | -3.3235  |
| DPM3     | -4.90599 | -4.34918 | -4.40864 | -4.13019 | -3.14252 |
| FDPS     | -2.66969 | -7.34411 | -4.13682 | -3.0395  | -3.78747 |
| PHPT1    | -5.3406  | -3.65272 | -5.20599 | -2.7562  | -4.02919 |
| H1FO     | -2.39947 | -5.97462 |          | -5.40733 | -7.22845 |
| LARP1    | -5.21268 | -4.44767 | -4.39428 | -3.35169 | -3.66781 |
| PELO     | -4.51194 | -3.94831 | -4.43919 | -4.3095  | -3.89211 |
| EIF3M    | -4.33676 | -4.41178 | -4.45814 | -3.87372 | -4.03554 |
| AP1G1    | -5.0688  | -5.35742 | -5.50152 |          | -5.22496 |
| MRPS30   | -6.23161 | -4.6515  | -5.9626  |          | -4.49192 |
| SEC31A   | -6.20277 | -2.68174 | -6.57541 | -2.74045 | -3.16096 |
| PLAA     | -6.78559 | -3.09967 | -4.882   | -3.17408 | -3.64067 |
| SRFBP1   | -4.66159 | -4.33369 | -4.68749 | -4.13513 | -4.07435 |
| PTCD3    | -5.70367 | -6.49356 | -4.04004 |          | -5.68621 |
| MAGED2   | -5.40322 | -3.85146 | -5.4058  | -3.21653 | -4.07487 |
| EIF3B    | -4.47637 | -4.32124 | -5.30535 | -3.38505 | -4.56041 |
| CS       | -5.22042 | -4.53609 | -5.55184 | -2.87752 | -4.26252 |
| EIF3G    | -5.6313  | -3.55223 | -5.87966 | -3.61441 | -3.93971 |
| REXO4    | -6.15304 | -3.13372 | -6.20833 | -2.7367  | -4.49684 |
| UQCRB    | -4.84067 | -6.32612 |          | -6.16547 | -5.84958 |
| RNMTL1   | -5.13713 | -4.86181 | -4.63101 | -4.26204 | -4.334   |
| SUGP2    |          | -5.40913 | -7.67616 | -5.24679 | -5.00569 |
| HIST1H1B | -5.44266 |          | -5.42009 | -9.51478 | -3.55424 |
| TNPO3    | -2.03511 | -5.51842 | -5.94533 | -5.99495 | -5.15353 |
| ACSL3    | -4.63473 | -5.94915 | -4.2796  | -4.96273 | -4.9775  |
| SRP68    | -8.73227 |          | -8.22924 | -8.11074 |          |
| LCP1     |          | -6.12033 | -6.77008 | -5.44633 | -6.90431 |
| TMEM41B  |          | -5.69977 | -8.445   | -5.62613 | -6.30196 |
| POLRMT   | -4.86626 | -5.38373 | -4.42114 | -6.32853 | -5.37705 |
| MARS     | -5.36    | -5.21882 | -6.09765 | -3.98115 | -5.75213 |
| YARS2    |          | -5.91674 | -8.7079  | -6.18342 | -6.25421 |

|        |          |          |          |          |          |
|--------|----------|----------|----------|----------|----------|
| HNRNPL |          | -8.75538 | -10.8127 | -4.99085 | -2.83198 |
| CBS    | -5.30031 | -4.80775 | -5.59167 | -5.88416 | -6.83911 |
| PDCD5  | -5.4503  | -6.92339 | -5.15005 | -5.4894  | -6.41734 |
| EIF3H  | -5.35421 | -7.169   | -5.42644 | -5.96185 | -7.1057  |

**Table S2. GPR19 induced protein expression alterations in the plasma membrane (CE2) compartment.** Significantly-regulated proteins (identified by official Gene Symbols) found in cells, differential between mock-transfection and the specific GPR19 expression level (0.5, 1, 2, 5, 10µg), are represented as a log2-transformed and normalized expression ratio between the specific GPR19 expression level and the expression level found in cells receiving empty vector transfection.

| Gene Symbol | CE2 0.5  | CE2 1    | CE2 2    | CE2 5    | CE2 10   |
|-------------|----------|----------|----------|----------|----------|
| RAD50       | 8.396166 | 7.69871  | 7.083238 | 6.343929 | 7.324503 |
| TACC3       | 5.255857 | 5.646168 | 5.230488 | 6.347601 | 4.998936 |
| PGM3        | 5.856697 | 5.963834 | 5.085445 | 5.101395 | 5.409277 |
| PDAP1       | 9.222202 | 8.955604 |          | 3.87075  | 4.442603 |
| DIABLO      | 5.956536 | 6.117558 | 6.896559 | 6.473151 |          |
| COLGALT1    | 4.255547 | 4.442226 | 4.261642 | 4.248381 | 4.5388   |
| UBA2        | 7.754652 |          | 6.813613 | 7.129645 |          |
| CLGN        |          | 7.256758 |          | 6.912912 | 7.304615 |
| RPS24       | 5.218748 | 5.433923 |          | 5.209906 | 5.444566 |
| FARSB       | 4.224168 | 4.234982 | 4.570312 | 3.002996 | 4.990068 |
| RTN3        | 2.830226 | 4.197738 | 3.638109 | 4.835835 | 4.50803  |
| MDC1        | 4.897054 | 3.58098  | 2.029585 | 5.436453 | 3.1684   |
| ETF1        | 4.890324 | 4.824556 | 5.130607 | 4.003568 |          |
| CCDC6       | 4.36654  | 2.398018 |          | 3.744082 | 8.004424 |
| DDX19A      | 5.441245 | 6.157138 |          |          | 6.622569 |
| NAA10       | 4.573187 | 5.639501 |          | 3.14981  | 4.746903 |
| GRB2        | 4.527323 | 4.485842 | 4.436292 |          | 4.659344 |
| KIAA1524    | 2.59011  | 4.156684 | 3.005384 | 4.310237 | 3.836749 |
| ANP32C      | 4.219499 | 4.218817 | 2.080707 | 2.471282 | 4.806223 |
| DCTN1       | 8.396502 |          | 2.100582 | 3.739887 | 3.223941 |
| GMPS        | 3.904269 | 4.159791 | 3.007207 | 2.588598 | 2.444054 |
| COPS4       | 3.806237 | 4.614148 |          | 2.947247 | 4.438288 |
| RIF1        | 8.395669 |          |          | 7.335939 |          |
| AHSA1       | 4.264408 | 6.039251 |          | 5.175856 |          |
| RRP9        | 3.0736   | 2.589998 | 3.621747 | 2.618888 | 3.381173 |
| LTA4H       | 2.815766 | 2.892392 | 3.123152 | 2.605819 | 3.758297 |
| BAG6        | 3.386025 | 4.516488 | 3.491089 | 3.374618 |          |
| TERF2       | 3.283414 | 4.624034 | 2.906634 | 3.870694 |          |
| NHP2        | 2.533864 | 2.560516 | 2.520298 | 3.648656 | 3.400519 |
| PSIP1       | 7.232805 |          |          |          | 7.136455 |
| SSU72       | 3.557537 | 3.097957 | 2.600004 | 2.923984 | 2.12216  |
| KRI1        | 4.524278 | 3.83669  |          | 2.507333 | 3.299088 |
| HN1         | 3.702839 | 3.502694 | 3.077645 |          | 3.847221 |
| RANBP3      | 3.265385 | 3.449178 | 2.209416 | 1.777415 | 3.281335 |
| ATIC        | 2.630077 | 2.766063 | 3.388891 | 2.269906 | 2.89886  |
| TPT1        | 3.144038 | 3.478618 | 2.276382 | 2.254789 | 2.753835 |
| PRPSAP2     | 3.077188 | 2.422165 | 2.700893 | 2.202787 | 3.381976 |

|         |          |          |          |          |          |
|---------|----------|----------|----------|----------|----------|
| HSPB1   | 8.395398 |          | 2.782095 | 2.552177 |          |
| EEA1    | 2.85673  | 2.62576  | 2.973406 | 2.73763  | 2.421728 |
| GPI     | 6.680979 | 6.906951 |          |          |          |
| KLF12   |          | 3.011002 | 2.833759 | 2.274424 | 5.329515 |
| KLF3    |          | 3.011002 | 2.833759 | 2.274424 | 5.329515 |
| KLF5    |          | 3.011002 | 2.833759 | 2.274424 | 5.329515 |
| KLF7    |          | 3.011002 | 2.833759 | 2.274424 | 5.329515 |
| MYNN    |          | 3.011002 | 2.833759 | 2.274424 | 5.329515 |
| ZKSCAN7 |          | 3.011002 | 2.833759 | 2.274424 | 5.329515 |
| ZSCAN16 |          | 3.011002 | 2.833759 | 2.274424 | 5.329515 |
| ZSCAN2  |          | 3.011002 | 2.833759 | 2.274424 | 5.329515 |
| ACTBL2  | 2.89498  |          | 3.911076 |          | 6.579158 |
| ABCF2   | 2.759438 | 2.598108 | 2.845067 | 2.699784 | 2.391323 |
| LSM14A  | 8.398797 |          | 1.642354 | 3.232209 |          |
| RPS10   | 1.36594  | 2.068691 | 2.635922 | 4.785406 | 2.155432 |
| ANP32A  | 2.807105 | 2.850172 | 2.17328  | 2.199548 | 2.798892 |
| MGEA5   | 2.911222 | 3.078775 | 1.826328 | 2.369549 | 2.559235 |
| PSMA3   | 2.017553 | 4.06889  | 3.505596 | 3.14588  |          |
| PGP     | 2.84083  | 2.91989  | 2.143372 | 1.975463 | 2.667839 |
| STMN4   | 8.396872 |          | 1.458049 | 2.606697 |          |
| NSF     |          | 4.198847 |          | 4.490125 | 3.667606 |
| REXO4   | 8.399349 | 3.744074 |          |          |          |
| BLVRA   | 3.132613 | 3.233212 |          | 2.617496 | 3.08048  |
| HDAC2   | 8.395493 | 3.665376 |          |          |          |
| NPEPPS  | 3.345038 | 3.752324 | 2.212608 | 2.704853 |          |
| CHCHD4  |          | 3.589819 |          | 4.102385 | 4.160435 |
| WDR6    | 2.815243 | 3.816346 | 2.16487  | 2.989692 |          |
| MSH6    | 2.762846 | 2.957977 | 2.896963 |          | 3.017527 |
| CTTN    |          |          | 2.866922 | 4.860484 | 3.817058 |
| CUL4B   | 3.154114 | 3.013078 |          | 2.628965 | 2.710734 |
| DDX51   |          |          |          | 6.285229 | 5.18558  |
| FLNB    | 2.663663 | 2.754046 | 1.543499 | 1.975149 | 2.407077 |
| EIF4A1  | 2.112437 | 2.434614 | 2.537098 | 1.611386 | 2.6457   |
| TMSB10  | 2.358047 | 3.15616  |          | 2.113698 | 3.636859 |
| ATAD1   | 8.39645  |          |          | 2.62197  |          |
| NUDT5   | 1.554188 | 2.607565 | 1.868897 | 1.852188 | 3.08241  |
| CTPS2   | 5.507572 | 5.451168 |          |          |          |
| ASNS    | 2.708524 | 3.149188 |          | 2.353701 | 2.572353 |
| EIF3B   | 2.291517 | 2.446221 |          | 3.424307 | 2.447734 |
| ESD     | 2.936422 | 2.585656 |          | 2.271308 | 2.731271 |
| MTHFD1  | 2.933236 | 3.364453 | 1.966768 | 2.130307 |          |
| DBI     | 2.585513 | 2.694352 |          | 2.099327 | 3.007038 |
| SMNDC1  | 8.398417 |          | 1.918355 |          |          |
| YWHAH   |          | 3.636871 | 3.743545 | 2.875597 |          |
| TSPYL1  |          | 4.12942  | 2.117655 |          | 4.002969 |

|            |          |          |          |          |          |
|------------|----------|----------|----------|----------|----------|
| TOP2B      | 4.057183 | 3.388927 |          |          | 2.767654 |
| PSMA2      | 3.189391 | 3.625871 | 3.235108 |          |          |
| DBNL       | 2.477241 | 2.689188 | 2.181023 |          | 2.682106 |
| C12orf43   |          | 3.361569 | 3.543783 |          | 3.081793 |
| ATF1       | 2.544336 | 2.539029 | 2.654205 |          | 2.245269 |
| CREB1      | 2.544336 | 2.539029 | 2.654205 |          | 2.245269 |
| CREM       | 2.544336 | 2.539029 | 2.654205 |          | 2.245269 |
| TUBB3      | 8.395337 |          | 1.570525 |          |          |
| RGS10      | 2.78774  | 2.96248  | 2.127421 | 2.082464 |          |
| GLO1       | 2.543639 | 2.627275 |          | 1.79655  | 2.967073 |
| TKT        | 3.254846 |          | 3.348993 | 3.296897 |          |
| STRAP      | 2.467938 | 2.649202 | 2.640798 | 2.001073 |          |
| ATP1A2     |          |          | 2.322769 | 4.28073  | 3.06016  |
| HIST2H2AA3 |          |          | 2.083622 | 4.715684 | 2.783803 |
| PFKP       | 3.171084 | 3.09114  |          |          | 3.290698 |
| CAD        | 2.682196 | 2.644532 |          | 1.851236 | 2.342075 |
| TRMT6      | 2.405282 | 2.789246 |          | 1.889109 | 2.337332 |
| EIF4G1     |          | 2.235987 | 1.727318 | 3.032223 | 2.271037 |
| NUP50      | 3.44336  | 2.277269 |          |          | 3.482992 |
| SART3      | 2.044567 | 2.726008 | 2.262118 | 2.105084 |          |
| ADSL       | 2.399793 | 2.613935 |          | 1.785176 | 2.321479 |
| VRK1       | 2.106812 |          | 2.177151 | 2.355274 | 2.442467 |
| NMT1       | 3.506067 |          | 2.61793  |          | 2.714857 |
| RAB11FIP1  |          | 2.641627 | 3.469086 | 2.678778 |          |
| ANAPC7     | 2.82991  |          | 2.982728 |          | 2.908205 |
| ARL3       | 2.062439 | 2.208102 |          | 1.794842 | 2.620009 |
| AP1M2      |          | 4.23929  |          |          | 4.427896 |
| PSMC3      | 2.874807 | 3.243435 |          | 2.506897 |          |
| GSTO1      | 3.12412  | 3.250886 |          | 2.190064 |          |
| HAT1       | 2.655587 | 2.98603  |          |          | 2.920157 |
| IMPDH2     | 2.106161 | 2.519863 | 1.882199 |          | 2.026422 |
| RPS19      |          | 4.045033 |          |          | 4.455749 |
| CBR1       |          | 3.065652 | 3.284494 |          | 2.100458 |
| CBR3       |          | 3.065652 | 3.284494 |          | 2.100458 |
| TXNDC12    | 8.397056 |          |          |          |          |
| STX18      | 8.39644  |          |          |          |          |
| WIZ        | 8.39617  |          |          |          |          |
| TOX4       | 8.395991 |          |          |          |          |
| DDX52      | 8.395844 |          |          |          |          |
| FDFT1      | 8.395719 |          |          |          |          |
| RIC8A      | 8.395663 |          |          |          |          |
| PDE9A      | 8.395463 |          |          |          |          |
| FAM21D     | 8.395418 |          |          |          |          |
| RNF14      | 8.395376 |          |          |          |          |
| C5orf24    | 8.395375 |          |          |          |          |

|          |          |          |          |          |          |
|----------|----------|----------|----------|----------|----------|
| WDR3     | 4.357123 | 2.050935 |          |          | 1.931114 |
| ADNP     | 2.088494 |          | 1.365711 | 3.057401 | 1.812595 |
| CPNE3    | 2.254952 | 2.291597 |          | 1.594939 | 2.172848 |
| ARHGDIA  | 1.802579 | 1.656896 | 2.485199 |          | 2.318728 |
| NAE1     | 2.288575 | 2.383351 |          |          | 3.505206 |
| TNPO2    | 4.066277 |          |          |          | 4.047242 |
| PFKL     | 3.055048 | 3.022286 |          | 1.980592 |          |
| DYNC1LI1 |          | 2.781648 | 2.636195 |          | 2.509732 |
| DYNLRB1  |          | 1.400357 | 2.021666 |          | 4.359371 |
| HMGN2    |          |          | 1.925437 |          | 5.701539 |
| PAK1     |          | 3.583922 |          |          | 4.001088 |
| CUL4A    | 2.822311 | 2.557187 |          | 2.192953 |          |
| BLVRB    | 2.613873 | 2.691149 |          |          | 2.246742 |
| RRM1     | 2.327804 | 1.518488 | 1.545126 |          | 2.123231 |
| IK       |          |          | 1.837014 | 1.870852 | 3.731015 |
| CDC27    |          |          |          | 3.722954 | 3.671455 |
| FKBP1A   |          | 3.971498 | 3.326964 |          |          |
| IDH1     |          | 3.180389 | 1.80409  |          | 2.286727 |
| SRCAP    |          | 3.916234 |          |          | 3.249127 |
| CCDC124  | 2.154575 |          | 2.730384 | 2.260632 |          |
| HMGN1    |          | 1.260303 | 1.615465 | 4.202282 |          |
| RAB5A    |          |          |          | 4.87823  | 2.154035 |
| ANXA6    |          | 3.524212 |          |          | 3.496774 |
| NSFL1C   |          |          | 2.492627 | 1.815971 | 2.67758  |
| SUPT5H   |          | 2.606333 |          | 2.052731 | 2.242365 |
| H2AFX    |          | 2.344584 |          |          | 4.554693 |
| OSBP     | 3.503244 | 3.39253  |          |          |          |
| NCAPH    | 2.622689 |          |          |          | 4.26361  |
| SDHA     |          |          | 3.77281  | 3.091626 |          |
| TBRG4    |          | 3.949745 | 2.882558 |          |          |
| GSTP1    | 1.831634 | 1.88716  | 3.100771 |          |          |
| SMS      | 2.342579 | 2.89901  |          | 1.570894 |          |
| PPAN     |          |          | 3.116608 |          | 3.68206  |
| PSME3    | 1.675126 | 1.972155 | 3.035634 |          |          |
| ILK      |          |          |          | 3.172317 | 3.458382 |
| PFDN2    | 2.296509 | 2.473959 |          | 1.773901 |          |
| PHPT1    | 2.115589 | 2.263457 |          | 2.154205 |          |
| EEF1D    | 3.248443 | 3.264089 |          |          |          |
| SMN1     |          |          |          | 4.286629 | 2.1458   |
| SMN2     |          |          |          | 4.286629 | 2.1458   |
| NDUFS8   |          |          |          | 3.055673 | 3.338904 |
| PRMT1    | 2.142419 | 2.22586  | 2.010731 |          |          |
| UCK2     | 1.61479  | 1.611933 | 1.854843 |          | 1.19442  |
| RPIA     | 2.937837 |          |          |          | 3.250943 |
| PIN1     | 2.208864 |          |          | 1.713509 | 2.240623 |

|           |          |          |          |          |          |
|-----------|----------|----------|----------|----------|----------|
| EIF5      | 1.42314  | 1.502995 | 1.609835 |          | 1.550721 |
| IKBKAP    |          | 2.322042 |          |          | 3.750714 |
| DDB1      |          | 4.282996 | 1.675605 |          |          |
| IWS1      | 2.580707 |          |          |          | 3.364823 |
| FERMT2    | 2.110109 | 2.277672 |          | 1.52274  |          |
| RPL3L     | 2.500626 |          | 3.394207 |          |          |
| SMC4      |          |          | 2.669424 | 1.960001 | 1.252565 |
| PSMA4     | 2.328312 | 2.331153 | 1.218382 |          |          |
| MCM3      | 1.542041 | 1.402712 |          |          | 2.891169 |
| NPEPPSL1  |          | 2.245471 | 1.864875 | 1.628121 |          |
| NASP      | 1.579377 | 1.254726 | 1.565387 |          | 1.269363 |
| NAP1L4    | 2.848959 |          | 2.765722 |          |          |
| USP5      | 2.758499 | 2.834105 |          |          |          |
| CIRH1A    |          | 2.703142 | 2.87378  |          |          |
| STAG2     |          |          | 2.264161 | 3.310964 |          |
| NDUFAF3   | 1.924381 |          |          | 1.6416   | 1.872009 |
| TXNDC17   | 2.625698 | 2.797193 |          |          |          |
| EIF2S1    |          |          | 1.6592   | 1.781232 | 1.970866 |
| CANX      |          |          | 2.048367 |          | 3.360125 |
| PSMC2     |          | 1.355187 | 2.211635 |          | 1.832703 |
| EIF4G3    | 2.666532 |          | 2.630139 |          |          |
| CIAO1     |          |          | 2.643759 | 2.580158 |          |
| GLYR1     |          |          | 3.314392 |          | 1.889903 |
| TPM4      | 2.154613 |          |          |          | 3.030962 |
| NPLOC4    | 2.237215 |          |          |          | 2.913432 |
| RAB35     |          |          |          | 5.135311 |          |
| DNAJC8    | 2.775094 |          |          |          | 2.360196 |
| TBCB      | 2.823318 | 2.290626 |          |          |          |
| AK1       | 2.498222 | 2.590154 |          |          |          |
| DISC1     | 2.109011 | 2.937282 |          |          |          |
| TRAX      | 2.109011 | 2.937282 |          |          |          |
| TSNAX     | 2.109011 | 2.937282 |          |          |          |
| BRIX1     |          |          | 1.222172 |          | 3.770992 |
| GLOD4     | 3.679702 |          | 1.309835 |          |          |
| CHD5      | 2.343682 | 2.599169 |          |          |          |
| CDKN2A    |          |          | 2.522094 |          | 2.41989  |
| CDKN2B    |          |          | 2.522094 |          | 2.41989  |
| HIST2H2AC |          |          | 2.083622 |          | 2.783803 |
| LDHA      | 2.376643 |          | 2.46049  |          |          |
| RGPD1     | 1.732433 | 1.693463 |          |          | 1.362749 |
| FLNA      |          |          |          |          | 4.705229 |
| AHI1      |          |          |          | 4.682157 |          |
| MAGOHB    |          |          |          | 4.616539 |          |
| HBS1L     |          |          | 1.60252  |          | 3.003525 |
| KIF5B     | 2.305372 | 2.270194 |          |          |          |

|               |          |          |          |          |          |
|---------------|----------|----------|----------|----------|----------|
| TUBA1B        | 2.256509 |          | 2.315176 |          |          |
| TBCE          |          | 2.205085 |          |          | 2.339361 |
| COQ9          | 2.333146 |          |          | 2.18664  |          |
| CNN3          | 2.500506 |          | 2.009336 |          |          |
| MSH2          | 1.411942 | 1.427824 |          |          | 1.584785 |
| POLR2A        | 2.577901 |          |          |          | 1.835639 |
| MTA1          | 1.622628 | 1.155342 |          | 1.597278 |          |
| PPME1         |          |          |          | 1.582711 | 2.783411 |
| XPO5          |          |          |          | 2.242301 | 2.119539 |
| LCP1          |          |          | 2.250931 | 2.090113 |          |
| PDHX          |          |          | 1.674125 |          | 2.664591 |
| NUP153        | 2.100429 |          |          |          | 2.220596 |
| TCERG1        | 1.11115  |          | 1.651533 |          | 1.556375 |
| MYH14         |          | 2.370724 |          | 1.920797 |          |
| SMC1A         | 1.250903 | 1.348833 | 1.667524 |          |          |
| DDI2          | 2.648164 |          |          | 1.607718 |          |
| DAP           |          |          |          |          | 4.253544 |
| BAG2          |          |          |          | 4.225133 |          |
| CLN6          |          |          |          | 4.162955 |          |
| NANS          | 2.025002 |          |          |          | 2.132202 |
| GPATCH4       | 1.146351 |          | 2.907607 |          |          |
| ACAT2         | 2.076233 |          |          | 1.947391 |          |
| CIAPIN1       | 1.517181 |          | 2.490515 |          |          |
| DKFZp686E0752 |          |          | 2.100582 |          | 1.888466 |
| RBMXL3        | 2.045071 |          | 1.924122 |          |          |
| CDV3          |          |          |          |          | 3.942235 |
| DKFZp586I031  |          |          |          | 3.84153  |          |
| TUBA1A        | 2.337513 |          |          |          | 1.446373 |
| RBM25         |          |          | 1.927971 |          | 1.848004 |
| LMAN2         | 1.141305 | 1.104857 |          | 1.52613  |          |
| PPM1G         |          |          | 2.06745  | 1.678038 |          |
| GTF3C5        | 3.601875 |          |          |          |          |
| PAK2          |          |          |          |          | 3.578705 |
| VBP1          |          | 1.757927 | 1.79784  |          |          |
| PYGL          | 1.804683 | 1.732025 |          |          |          |
| DSG1          |          |          |          | 3.506583 |          |
| ADH5          |          | 3.501293 |          |          |          |
| PSMD2         | 1.142714 | 1.114172 |          |          | 1.218004 |
| RNF40         |          |          |          |          | 3.472232 |
| ZNF346        |          |          |          |          | 3.468571 |
| ELMOD2        |          |          |          |          | 3.452888 |
| RFC2          | 1.818761 | 1.629611 |          |          |          |
| AKAP8         |          |          |          |          | 3.432349 |
| PHKA1         |          |          |          |          | 3.425716 |
| FLII          | 3.42069  |          |          |          |          |



|          |          |          |          |          |          |
|----------|----------|----------|----------|----------|----------|
| STUB1    |          |          |          | 3.419912 |          |
| ROCK2    |          |          |          | 3.410404 |          |
| ESF1     | 1.533084 |          |          |          | 1.866348 |
| IGF2BP2  |          |          |          | 2.149886 | 1.234563 |
| HDAC6    |          |          | 1.776288 |          | 1.597609 |
| RBM3     |          |          | 1.508934 | 1.862118 |          |
| MAP1S    |          |          |          |          | 3.368592 |
| EIF5B    |          | 1.418818 |          | 1.938088 |          |
| OMA1     |          |          |          |          | 3.346786 |
| TOM1     |          |          |          | 3.336384 |          |
| PPIE     |          |          |          | 3.317107 |          |
| HN1L     | 1.739822 | 1.553986 |          |          |          |
| EMG1     |          | 1.805193 |          |          | 1.483146 |
| SREK1    |          |          |          |          | 3.283596 |
| ACADVL   |          |          |          |          | 3.273028 |
| CFL1     |          |          |          |          | 3.271146 |
| SCRN1    |          |          |          | 3.221957 |          |
| APEX1    |          |          |          | 3.201266 |          |
| TUBB4A   |          |          | 3.200282 |          |          |
| VEZF1    |          |          |          |          | 3.180091 |
| CCDC86   |          |          | 1.070258 |          | 2.100729 |
| TFCP2    |          |          | 3.154542 |          |          |
| UBP1     |          |          | 3.154542 |          |          |
| MYO1B    |          |          |          |          | 3.102331 |
| AASDHPPT |          |          |          | 3.088458 |          |
| MCL1     |          |          |          | 3.074545 |          |
| ANXA5    |          |          | 1.864747 |          | 1.200904 |
| ATP2A3   |          |          |          | 3.063403 |          |
| RGPD2    |          | 1.693463 |          |          | 1.362749 |
| PRKAG1   |          |          |          | 3.030451 |          |
| SERPINH1 |          |          |          | 3.009685 |          |
| SMARCB1  |          |          |          |          | 3.006108 |
| LDHAL6B  |          |          | 2.990718 |          |          |
| UBE2N    |          |          |          |          | 2.980724 |
| PPP1CB   |          |          |          | 2.95934  |          |
| MYH10    | 1.556372 | 1.367202 |          |          |          |
| HNRNPD   |          |          |          |          | 2.921809 |
| CENPV    |          | 1.195371 |          |          | 1.713292 |
| HMG20B   |          |          |          |          | 2.902378 |
| TLN1     |          |          | 1.621591 |          | 1.253681 |
| APOBEC3C |          |          |          | 2.872783 |          |
| CCDC47   | 2.870649 |          |          |          |          |
| TOP1MT   | 1.105843 |          |          | 1.761203 |          |
| MKI67    |          |          | 1.527097 |          | 1.311735 |
| RPL18A   |          | 1.367772 |          |          | 1.468623 |

|          |          |          |          |          |          |
|----------|----------|----------|----------|----------|----------|
| UAP1     |          |          |          |          | 2.822279 |
| SEPT9    |          |          |          |          | 2.814901 |
| TMEM180  |          | 2.813605 |          |          |          |
| XPO7     |          | 1.381979 |          |          | 1.420289 |
| DARS     | 1.134166 |          | 1.663665 |          |          |
| SLC9A3R1 |          |          | 1.582212 |          | 1.205664 |
| UBL4A    |          |          | 1.567043 |          | 1.190246 |
| SMC2     |          | 2.70295  |          |          |          |
| MORF4L2  |          |          |          | 2.684399 |          |
| QARS     | 1.311078 | 1.369517 |          |          |          |
| C3orf17  |          |          |          |          | 2.631293 |
| HLA-B    |          |          |          | 2.608514 |          |
| HLA-C    |          |          |          | 2.608514 |          |
| DHFR     |          |          |          |          | 2.528393 |
| CHORDC1  |          |          |          |          | 2.486938 |
| POLR2E   |          |          |          | 2.457537 |          |
| DCTPP1   |          |          |          |          | 2.404791 |
| HTATSF1  |          |          | 1.271637 |          | 1.124999 |
| TUBA1C   |          |          | 2.373789 |          |          |
| ALCAM    | 2.367477 |          |          |          |          |
| GOLIM4   |          |          |          |          | 2.353958 |
| RPE      |          |          |          | 2.347019 |          |
| PRPF3    |          |          |          | 2.341057 |          |
| TUBA1A   |          |          | 2.339691 |          |          |
| CPSF3    | 1.123438 | 1.207329 |          |          |          |
| PSMD6    |          | 2.317931 |          |          |          |
| PAFAH1B1 |          | 2.310399 |          |          |          |
| PSMC5    |          | 2.306194 |          |          |          |
| ERCC6L   | 2.299655 |          |          |          |          |
| RPLP0    | 2.273211 |          |          |          |          |
| STIP1    | 1.106559 | 1.164233 |          |          |          |
| SEPT2    |          |          |          |          | 2.25728  |
| NIFK     | 2.255057 |          |          |          |          |
| HIST2H3A |          |          | 2.253183 |          |          |
| PRDX4    |          |          | 2.252693 |          |          |
| QKI      |          |          | 2.247704 |          |          |
| TES      | 2.245258 |          |          |          |          |
| LRPAP1   |          |          |          |          | 2.242278 |
| EIF3I    |          |          |          | 2.226455 |          |
| TSN      |          | 2.204109 |          |          |          |
| DDX23    |          |          |          |          | 2.202271 |
| TPD52    |          |          |          | 2.193949 |          |
| ACTN1    |          |          |          | 2.184697 |          |
| TCEA1    |          |          |          |          | 2.178464 |
| GDI2     |          |          |          |          | 2.177502 |

|          |          |  |          |          |          |
|----------|----------|--|----------|----------|----------|
| EIF2B2   |          |  |          |          | 2.168518 |
| KIAA1033 | 2.097702 |  |          |          |          |
| ERCC6L   |          |  |          |          | 2.089868 |
| PAFAH1B1 | 2.067439 |  |          |          |          |
| ANP32B   | 2.053316 |  |          |          |          |
| TUBA4A   |          |  | 2.042978 |          |          |
| PRPF4B   |          |  | 2.03932  |          |          |
| PSMD12   |          |  |          | 2.037397 |          |
| MDH1     | 2.024572 |  |          |          |          |
| DYNLRB2  |          |  | 2.021666 |          |          |
| MRI1     |          |  |          | 2.01823  |          |
| NUCKS1   | 2.016247 |  |          |          |          |
| CCT3     |          |  |          | 2.007019 |          |
| CBR4     |          |  |          | 1.989354 |          |
| KT112    |          |  |          | 1.964778 |          |
| SLC7A1   |          |  |          | 1.939308 |          |
| CDK12    |          |  |          | 1.932448 |          |
| NUFIP2   |          |  |          | 1.920692 |          |
| PSMD14   | 1.901163 |  |          |          |          |
| BAZ1B    |          |  | 1.894201 |          |          |
| ANXA7    |          |  |          | 1.893069 |          |
| GALK1    |          |  |          | 1.890616 |          |
| HNRNPUL1 |          |  | 1.889222 |          |          |
| CSNK2A1  |          |  | 1.87473  |          |          |
| LARP1    |          |  | 1.866332 |          |          |
| PRMT8    |          |  | 1.850692 |          |          |
| SNRNP200 |          |  | 1.844081 |          |          |
| RPL35A   |          |  |          | 1.83632  |          |
| RPS16    |          |  | 1.813713 |          |          |
| PARK7    |          |  |          | 1.811951 |          |
| UHRF1    |          |  |          | 1.806173 |          |
| TNPO1    |          |  |          | 1.778109 |          |
| TXNL1    |          |  |          | 1.764343 |          |
| ACTR3    |          |  |          | 1.761343 |          |
| UBBP4    |          |  | 1.758443 |          |          |
| PSMA8    |          |  | 1.756944 |          |          |
| ZC3H13   |          |  | 1.737082 |          |          |
| SETDB1   |          |  | 1.727491 |          |          |
| DHX36    |          |  | 1.697293 |          |          |
| NEDD8    |          |  |          |          | 1.692487 |
| DDX39B   |          |  | 1.660506 |          |          |
| PRRC2A   |          |  |          | 1.633617 |          |
| GBAS     |          |  |          | 1.633366 |          |
| ARPC5L   |          |  | 1.632602 |          |          |
| HOXB9    |          |  |          | 1.62912  |          |

|         |          |          |          |          |          |
|---------|----------|----------|----------|----------|----------|
| MCM2    |          |          |          | 1.627222 |          |
| HSPH1   |          |          |          | 1.626328 |          |
| CBX8    |          |          | 1.61811  |          |          |
| PPP2R1B |          |          | 1.616749 |          |          |
| FIP1L1  |          |          |          | 1.609962 |          |
| KIF4A   |          |          |          |          | 1.599431 |
| APEH    |          |          |          |          | 1.583877 |
| LUC7L   |          |          |          | 1.581412 |          |
| FXR1    |          |          |          |          | 1.580384 |
| PRKDC   |          |          |          |          | 1.577578 |
| SGTA    |          |          | 1.575902 |          |          |
| CARHSP1 |          |          | 1.57065  |          |          |
| DTYMK   |          |          | 1.566357 |          |          |
| METAP1  | 1.563878 |          |          |          |          |
| CHD3    |          |          |          | 1.562453 |          |
| FAM98A  |          |          |          | 1.557329 |          |
| EIF2A   |          |          | 1.551684 |          |          |
| DNAH17  |          |          |          |          | 1.548303 |
| UBE2D3  |          |          | 1.529338 |          |          |
| ME2     |          |          |          | 1.518048 |          |
| SRRM2   | 1.516944 |          |          |          |          |
| EARS2   |          |          |          | 1.513715 |          |
| MAD1L1  |          |          |          | 1.509956 |          |
| POTEKP  |          |          | 1.504923 |          |          |
| NACA    |          |          | 1.50349  |          |          |
| NACAP1  |          |          | 1.50349  |          |          |
| LRRC47  |          | 1.488033 |          |          |          |
| FXR2    |          |          |          |          | 1.445578 |
| HINT1   |          |          | 1.408848 |          |          |
| EEF1A1  |          |          | 1.402572 |          |          |
| WIBG    |          |          |          |          | 1.392807 |
| RPS10P5 |          | 1.374198 |          |          |          |
| TRMT112 |          |          |          |          | 1.364311 |
| AGPAT9  |          |          |          |          | 1.364114 |
| HSPA9   |          |          | 1.335724 |          |          |
| PSMA6   |          | 1.333539 |          |          |          |
| PPP2R1A |          |          | 1.30445  |          |          |
| ALDOC   |          |          | 1.291011 |          |          |
| G3BP1   | 1.290525 |          |          |          |          |
| CKS1B   |          |          |          |          | 1.284495 |
| EIF5AL1 |          |          | 1.276704 |          |          |
| RNH1    | 1.271124 |          |          |          |          |
| TIAL1   |          |          | 1.254393 |          |          |
| ACTA1   |          |          | 1.252366 |          |          |
| ACTC1   |          |          | 1.252366 |          |          |

|          |          |          |          |  |          |
|----------|----------|----------|----------|--|----------|
| PDCD6IP  |          |          | 1.23835  |  |          |
| PRPSAP1  |          |          |          |  | 1.221887 |
| POLA2    |          |          | 1.216492 |  |          |
| FBL      |          |          |          |  | 1.206014 |
| ATP6V1A  |          |          |          |  | 1.201298 |
| DCP1A    |          |          | 1.192596 |  |          |
| PDS5B    |          |          | 1.176637 |  |          |
| POLR2F   | 1.17413  |          |          |  |          |
| P4HB     |          |          | 1.167048 |  |          |
| PKLR     |          |          |          |  | 1.155769 |
| COTL1    | 1.148505 |          |          |  |          |
| TUBB4B   | 1.141674 |          |          |  |          |
| TAGLN3   | 1.13987  |          |          |  |          |
| NDUFS3   |          |          | 1.139498 |  |          |
| ACTG1    |          |          | 1.134789 |  |          |
| DNAJC9   |          |          |          |  | 1.128284 |
| POLR1B   | 1.125633 |          |          |  |          |
| AP1B1    |          |          |          |  | 1.125592 |
| RPN2     |          |          | 1.118738 |  |          |
| TUBB     |          |          | 1.116309 |  |          |
| HSPE1    |          |          | 1.111033 |  |          |
| RBM12    | 1.110149 |          |          |  |          |
| TUBA3E   |          |          | 1.110002 |  |          |
| CUL1     | 1.103107 |          |          |  |          |
| CKB      |          |          | 1.099887 |  |          |
| GTF3C1   |          |          | 1.093405 |  |          |
| POLR1A   |          |          | 1.088984 |  |          |
| TRIM28   |          |          | 1.076259 |  |          |
| ZNF280C  |          |          | 1.058779 |  |          |
| DNAJB12  |          |          | 1.041633 |  |          |
| EDC4     |          |          | 1.037882 |  |          |
| CDK4     |          |          | 1.008909 |  |          |
| RPLP2    |          |          | 1.00117  |  |          |
| PPP2CB   |          |          | -1.00916 |  |          |
| PPP1R14B |          |          | -1.01396 |  |          |
| TIMM22   |          |          | -1.01472 |  |          |
| RBM12B   |          |          | -1.02965 |  |          |
| MLEC     |          |          | -1.03495 |  |          |
| RUVBL2   |          |          | -1.04516 |  |          |
| RB1      |          |          | -1.06257 |  |          |
| MAZ      |          |          | -1.07808 |  |          |
| SF3B4    |          |          | -1.09069 |  |          |
| CCDC51   |          |          | -1.09908 |  |          |
| UQCRC2   |          |          |          |  | -1.1091  |
| ZNF638   |          | -1.10911 |          |  |          |

|          |          |          |          |  |          |
|----------|----------|----------|----------|--|----------|
| NDUFB10  | -1.11476 |          |          |  |          |
| HSPA13   | -1.11566 |          |          |  |          |
| SPTBN4   |          |          | -1.128   |  |          |
| BRAT1    |          |          | -1.12855 |  |          |
| VAT1     |          |          | -1.14081 |  |          |
| CHCHD1   |          |          | -1.14543 |  |          |
| CAMSAP3  | -1.14555 |          |          |  |          |
| LMNB1    |          |          |          |  | -1.14797 |
| GALNT2   |          |          |          |  | -1.15508 |
| MRPS31   |          | -1.1554  |          |  |          |
| SLC25A13 | -1.16242 |          |          |  |          |
| SLC25A6  | -1.16807 |          |          |  |          |
| ACTN4    | -1.16988 |          |          |  |          |
| STAMBP   |          |          | -1.17408 |  |          |
| SEC24C   | -1.17618 |          |          |  |          |
| MTX2     | -1.1889  |          |          |  |          |
| LSM7     |          |          | -1.19163 |  |          |
| NKTR     |          |          | -1.19658 |  |          |
| SNTB2    |          |          | -1.19795 |  |          |
| PGM2     |          |          | -1.21145 |  |          |
| NOP58    | -1.21251 |          |          |  |          |
| ERLIN2   |          | -1.21726 |          |  |          |
| GSR      |          |          | -1.22906 |  |          |
| LYZ      |          |          | -1.23648 |  |          |
| DNTTIP2  |          |          |          |  | -1.24395 |
| LYPLAL1  |          |          | -1.24517 |  |          |
| COPB1    |          |          | -1.24529 |  |          |
| NDUFA4   | -1.24583 |          |          |  |          |
| TMLHE    |          |          | -1.27025 |  |          |
| RNPS1    |          |          |          |  | -1.2714  |
| SCPEP1   |          |          | -1.27248 |  |          |
| PYCR1    |          |          |          |  | -1.27453 |
| CCDC88A  | -1.27471 |          |          |  |          |
| PFDN5    |          |          | -1.27554 |  |          |
| MMAB     | -1.28051 |          |          |  |          |
| CGGBP1   | -1.28207 |          |          |  |          |
| TIMM23   |          |          | -1.28665 |  |          |
| TIMM23B  |          |          | -1.28665 |  |          |
| SDHB     |          |          | -1.28684 |  |          |
| PRSS1    |          | -1.30976 |          |  |          |
| PRSS2    |          | -1.30976 |          |  |          |
| PRSS3P2  |          | -1.30976 |          |  |          |
| EXOSC5   |          |          | -1.32081 |  |          |
| CWC15    |          |          |          |  | -1.32896 |
| BOP1     |          | -1.33159 |          |  |          |

|          |          |          |          |          |          |
|----------|----------|----------|----------|----------|----------|
| SPG20    |          |          |          |          | -1.33557 |
| WDR43    |          |          | -1.36443 |          |          |
| DIEXF    |          | -1.37618 |          |          |          |
| CDC45    |          |          | -1.40076 |          |          |
| TRO      |          |          | -1.4076  |          |          |
| PDCD11   | -1.41131 |          |          |          |          |
| PPP6R1   |          |          | -1.4252  |          |          |
| FAF2     |          |          | -1.42749 |          |          |
| PHC2     |          |          | -1.42766 |          |          |
| MARK3    |          |          | -1.44908 |          |          |
| MARK4    |          |          | -1.44908 |          |          |
| NDUFS4   |          |          | -1.44972 |          |          |
| RAP1GDS1 |          |          | -1.46996 |          |          |
| EXOSC9   |          |          |          |          | -1.47545 |
| MCCC2    |          | -1.47809 |          |          |          |
| HCFC1    |          |          |          |          | -1.48259 |
| C19orf52 |          |          | -1.4936  |          |          |
| ERO1L    |          | -1.49414 |          |          |          |
| POLR1C   |          |          |          | -1.50428 |          |
| GCN1L1   |          |          |          | -1.51573 |          |
| REEP5    |          |          |          |          | -1.5168  |
| G3BP2    |          |          | -1.52082 |          |          |
| YME1L1   |          |          | -1.52959 |          |          |
| EXOC3L4  |          |          | -1.53352 |          |          |
| RGPD5    |          |          | -1.55343 |          |          |
| XPO6     |          |          | -1.55413 |          |          |
| ALDH1L2  |          |          |          | -1.55708 |          |
| CORO1C   |          |          |          | -1.56106 |          |
| TECR     |          | -1.56485 |          |          |          |
| PTPN1    |          |          | -1.57248 |          |          |
| GRWD1    |          |          |          | -1.57849 |          |
| NOMO2    |          |          | -1.5839  |          |          |
| NSUN4    |          |          | -1.60201 |          |          |
| CSNK2A2  |          |          | -1.61239 |          |          |
| AIG1     |          |          |          | -1.63224 |          |
| GOSR2    |          |          | -1.65214 |          |          |
| MYBBP1A  |          |          |          |          | -1.65342 |
| SRPRB    |          |          | -1.68789 |          |          |
| USP14    |          |          |          | -1.6973  |          |
| ABHD10   |          |          | -1.69968 |          |          |
| CSTF2    |          |          |          |          | -1.7048  |
| SUCLG2   |          | -1.73871 |          |          |          |
| SRRM1    |          |          |          | -1.74111 |          |
| FAR1     |          |          |          |          | -1.74231 |
| HIST1H3A |          |          |          | -1.75195 |          |

|              |          |          |          |          |          |
|--------------|----------|----------|----------|----------|----------|
| ETFA         |          |          | -1.7546  |          |          |
| TTC7A        |          |          | -1.75771 |          |          |
| REEP5        |          |          | -1.76584 |          |          |
| DDX6         |          |          | -1.7732  |          |          |
| ICT1         |          |          | -1.82779 |          |          |
| DECR1        |          |          | -1.83704 |          |          |
| ARF3         |          |          | -1.85763 |          |          |
| SRRT         |          |          | -1.86454 |          |          |
| RGPD3        |          |          | -1.87203 |          |          |
| RGPD4        |          |          | -1.87203 |          |          |
| AHCTF1       |          |          | -1.9028  |          |          |
| ACTR2        |          |          | -1.92913 |          |          |
| PPP6R3       |          |          | -1.94344 |          |          |
| BCL2L10      |          |          | -1.94839 |          |          |
| SPTBN2       |          |          | -1.95511 |          |          |
| SNRPF        |          |          | -1.95716 |          |          |
| ATP5O        |          |          | -1.95751 |          |          |
| RPL27        |          |          |          | -1.96694 |          |
| PDIA3        |          |          |          | -1.97012 |          |
| LYRM7        |          |          | -1.98578 |          |          |
| ACAT1        |          |          |          | -1.99768 |          |
| GATAD2A      | -2.00115 |          |          |          |          |
| UBE2O        | -2.0075  |          |          |          |          |
| MRPS9        |          |          | -2.01295 |          |          |
| PAIP1        |          |          | -2.01615 |          |          |
| VAR5         |          |          |          |          | -2.02383 |
| COMMD6       | -2.03996 |          |          |          |          |
| CAMK2D       | -2.04093 |          |          |          |          |
| FANCI        | -2.04489 |          |          |          |          |
| COIL         |          |          | -2.05517 |          |          |
| FKBP4        |          |          | -2.06061 |          |          |
| UTP20        |          |          | -2.08717 |          |          |
| THOC6        |          |          | -2.08785 |          |          |
| INIP         | -2.09532 |          |          |          |          |
| HIST3H3      |          |          |          | -2.1374  |          |
| NPM3         |          |          | -2.13896 |          |          |
| TMPO         |          |          |          |          | -2.14128 |
| MAN2B1       |          |          | -2.14592 |          |          |
| TMEM205      |          |          |          |          | -2.15592 |
| LPCAT1       | -2.16116 |          |          |          |          |
| POLR1E       |          |          |          |          | -2.16166 |
| PAK1IP1      |          | -2.16245 |          |          |          |
| TMED7        |          |          |          |          | -2.16247 |
| TMED7-TICAM2 |          |          |          |          | -2.16247 |
| DCBLD2       |          |          | -2.17121 |          |          |



|                |          |          |          |          |          |
|----------------|----------|----------|----------|----------|----------|
| FHL1           |          |          | -2.18492 |          |          |
| CSTF3          |          | -2.18621 |          |          |          |
| SSR4           |          |          |          |          | -2.19183 |
| NDUFA3         |          |          |          |          | -2.19232 |
| PDS5A          |          |          |          | -2.19316 |          |
| COX5B          |          | -2.20824 |          |          |          |
| KIF16B         |          |          | -2.21275 |          |          |
| KIF3A          |          |          | -2.21275 |          |          |
| KIF6           |          |          | -2.21275 |          |          |
| RABL6          | -2.22525 |          |          |          |          |
| NIP7           |          |          | -2.22542 |          |          |
| NDUFS1         |          | -2.23322 |          |          |          |
| CNIH4          |          | -2.24852 |          |          |          |
| GHITM          |          | -2.25257 |          |          |          |
| NFKBIL1        | -2.25674 |          |          |          |          |
| DLG1           |          |          |          |          | -2.25945 |
| GPT2           |          | -2.26076 |          |          |          |
| PREB           |          |          | -2.27082 |          |          |
| MIA3           |          | -2.27298 |          |          |          |
| C12orf73       |          |          |          |          | -2.29409 |
| COX4I1         |          | -2.31342 |          |          |          |
| HSPA4L         |          |          | -2.31391 |          |          |
| GK             |          |          |          | -2.31966 |          |
| GK3P           |          |          |          | -2.31966 |          |
| ALDH5A1        |          | -2.32574 |          |          |          |
| KRTCAP2        |          |          |          |          | -2.3308  |
| SYNJ2BP        | -2.33112 |          |          |          |          |
| FAM114A2       |          |          |          |          | -2.33745 |
| GIGYF2         |          |          |          | -2.3379  |          |
| NDUFAF2        | -2.35618 |          |          |          |          |
| NOP16          |          |          | -2.35907 |          |          |
| KHDRBS3        | -2.3595  |          |          |          |          |
| ASMTL          | -2.36187 |          |          |          |          |
| C7orf55-LUC7L2 | -2.37358 |          |          |          |          |
| SUPT6H         |          |          |          | -2.37395 |          |
| ACOT7          |          |          |          | -2.37895 |          |
| ATP6V1B1       |          | -2.37952 |          |          |          |
| BPNT1          |          |          | -2.38095 |          |          |
| PSMB3          |          |          |          | -2.38387 |          |
| MANBAL         |          |          |          |          | -2.38513 |
| AP3M1          |          |          |          | -2.39502 |          |
| PTCD3          |          |          | -2.40615 |          |          |
| HLA-A          |          |          |          |          | -2.42323 |
| LAMP2          |          | -2.42551 |          |          |          |

|               |          |          |          |          |          |
|---------------|----------|----------|----------|----------|----------|
| BUD31         |          |          |          |          | -2.44734 |
| NCAPD3        |          |          | -2.45663 |          |          |
| DES           | -1.21598 |          | -1.24522 |          |          |
| NOL11         | -2.47084 |          |          |          |          |
| PRPH          | -1.30613 |          | -1.17451 |          |          |
| H2AFV         | -2.48235 |          |          |          |          |
| UTP11L        | -2.48239 |          |          |          |          |
| PHB           | -1.37903 | -1.10556 |          |          |          |
| SLC33A1       |          | -2.51406 |          |          |          |
| TIMM10B       |          | -2.52139 |          |          |          |
| TMOD3         |          |          | -2.527   |          |          |
| MKLN1         |          |          | -2.53646 |          |          |
| AGPS          |          |          |          |          | -2.55315 |
| SYNJ2BP-COX16 |          | -2.55547 |          |          |          |
| PSAP          |          |          |          |          | -2.56886 |
| RGPD8         |          |          | -2.57272 |          |          |
| SSR1          |          | -2.57662 |          |          |          |
| OSBPL8        |          |          | -2.58392 |          |          |
| CNOT1         |          |          | -2.58404 |          |          |
| MRPL45        |          | -2.58432 |          |          |          |
| ATP5SL        | -1.35189 |          |          |          | -1.24605 |
| ATP5J         |          | -2.62367 |          |          |          |
| WBP11         |          |          |          |          | -2.62712 |
| ELAVL1        |          | -2.62984 |          |          |          |
| MRPL22        | -2.65908 |          |          |          |          |
| GNA11         |          |          | -2.68151 |          |          |
| GNA14         |          |          | -2.68151 |          |          |
| GNAQ          |          |          | -2.68151 |          |          |
| MRPS25        |          |          | -1.56416 |          | -1.12077 |
| SLC39A9       |          |          |          |          | -2.69056 |
| SLC25A12      | -1.17503 |          | -1.53207 |          |          |
| CTCF          | -2.71075 |          |          |          |          |
| GNG5          | -1.4157  |          |          |          | -1.30281 |
| PPIAL4A       | -2.72575 |          |          |          |          |
| SRSF11        | -2.75083 |          |          |          |          |
| ATP5A1        |          | -1.24159 |          | -1.5355  |          |
| HACL1         |          |          | -2.78187 |          |          |
| UBQLN1        |          |          |          | -1.72742 | -1.12263 |
| MRPS7         |          | -2.90146 |          |          |          |
| DDT           |          |          | -2.90901 |          |          |
| DDTL          |          |          | -2.90901 |          |          |
| NIPSNAP1      |          |          | -1.11274 |          | -1.81062 |
| MRPL45        | -2.96006 |          |          |          |          |
| NUP88         |          |          |          | -2.96026 |          |
| CTR9          |          |          | -2.97888 |          |          |

|              |          |          |          |          |          |
|--------------|----------|----------|----------|----------|----------|
| SPIN1        |          |          |          |          | -2.99229 |
| AGK          | -1.17916 |          | -1.8191  |          |          |
| VDAC3        | -1.51585 |          | -1.49345 |          |          |
| NUP93        |          | -3.01937 |          |          |          |
| AMOT         |          |          |          | -3.02075 |          |
| TARS2        |          |          |          |          | -3.02639 |
| LOC102724023 |          |          |          |          | -3.0301  |
| GEMIN6       |          |          |          |          | -3.03303 |
| DACH2        |          |          |          |          | -3.03316 |
| ERAL1        | -1.66199 |          |          |          | -1.37161 |
| SUCLA2       |          |          |          |          | -3.03472 |
| ATG3         |          |          |          | -3.03867 |          |
| CHTOP        |          |          | -1.83287 |          | -1.20788 |
| NDUFS5       |          |          |          |          | -3.05744 |
| GADD45GIP1   |          |          | -1.74697 |          | -1.31996 |
| MRPS2        |          |          |          |          | -3.06916 |
| EPRS         |          |          |          |          | -3.07368 |
| UTP18        |          |          |          |          | -3.07788 |
| EIF1AX       |          |          |          | -3.07791 |          |
| RPL6         |          |          |          |          | -3.07829 |
| NT5C3B       |          |          |          |          | -3.08342 |
| KRT5         |          |          |          | -3.09786 |          |
| KARS         |          |          |          | -3.11038 |          |
| HSPBP1       |          |          |          |          | -3.11635 |
| TRAFFD1      |          |          |          |          | -3.11694 |
| PPP2R2A      |          |          |          |          | -3.11802 |
| PPP2R2C      |          |          |          |          | -3.11802 |
| RPS28        |          |          |          | -3.11829 |          |
| S100A13      |          |          |          | -3.11925 |          |
| UROD         |          |          |          |          | -3.12246 |
| MYH1         |          |          |          |          | -3.12378 |
| MYH13        |          |          |          |          | -3.12378 |
| MYH2         |          |          |          |          | -3.12378 |
| CEP170       |          |          | -3.12517 |          |          |
| RAB18        |          |          |          |          | -3.12607 |
| ANKLE2       |          |          |          | -3.13059 |          |
| YIPF5        |          |          |          |          | -3.13226 |
| LIN7B        |          |          |          |          | -3.13237 |
| MRPL49       |          |          | -1.60293 | -1.53817 |          |
| U2AF2        |          |          |          |          | -3.14343 |
| CLASP2       |          |          |          |          | -3.15945 |
| HSP90B2P     |          |          |          |          | -3.16336 |
| SEC23B       |          |          |          | -3.16532 |          |
| ALDH2        |          |          |          |          | -3.17587 |
| BCAP31       |          |          | -1.72292 |          | -1.45334 |

|            |          |          |          |          |          |
|------------|----------|----------|----------|----------|----------|
| ZNF330     |          |          |          | -3.17876 |          |
| BLMH       |          |          | -1.73566 |          | -1.44336 |
| TMEM41B    |          |          |          |          | -3.1829  |
| DACH1      |          |          |          |          | -3.18506 |
| MAP1LC3B   |          |          |          |          | -3.18523 |
| MAP1LC3B2  |          |          |          |          | -3.18523 |
| HIST2H3PS2 |          |          |          |          | -3.19092 |
| SNX18      |          |          |          | -3.19827 |          |
| RSU1       |          |          |          |          | -3.21191 |
| NCAPD2     |          |          |          |          | -3.21349 |
| SLC25A10   |          |          | -1.8962  |          | -1.32037 |
| OGFR       |          |          |          |          | -3.22563 |
| FAF1       |          |          |          | -3.2377  |          |
| SRP19      | -1.67919 | -1.55882 |          |          |          |
| BAG3       |          |          |          |          | -3.24052 |
| WBP2       |          |          |          |          | -3.24064 |
| RELA       |          |          |          |          | -3.24188 |
| YWHAE      |          |          |          | -3.2432  |          |
| GLG1       | -1.64478 | -1.60339 |          |          |          |
| GNB2L1     |          | -1.2349  |          | -2.01328 |          |
| MRPS6      | -1.58098 | -1.69447 |          |          |          |
| MRPL1      |          |          |          |          | -3.28206 |
| MRPS17     |          |          |          | -2.03559 | -1.24748 |
| ALDH16A1   |          |          |          |          | -3.28612 |
| SDF4       |          |          |          | -3.30313 |          |
| QPCTL      |          |          |          | -3.30868 |          |
| KIAA1429   |          |          |          |          | -3.30881 |
| RPS5       |          |          |          |          | -3.3094  |
| ITGB1      |          |          |          | -3.33129 |          |
| NDUFA13    |          |          |          |          | -3.34779 |
| UFD1L      |          |          |          |          | -3.35071 |
| HSP90B1    |          |          |          |          | -3.36368 |
| HIST1H2AA  |          |          | -3.36735 |          |          |
| HIST2H2AB  |          |          | -3.36735 |          |          |
| GMPR2      |          |          |          |          | -3.36912 |
| RQCD1      |          |          |          |          | -3.37351 |
| NUP214     |          | -1.14842 |          | -2.22845 |          |
| CWF19L1    |          |          |          | -3.39796 |          |
| S100A11    |          |          |          | -3.40122 |          |
| SPCS2      |          |          |          | -3.41001 |          |
| TFIP11     |          |          |          | -3.41337 |          |
| LRRFIP1    |          |          |          | -3.41549 |          |
| SMPD4      |          |          |          |          | -3.4164  |
| CAST       |          |          |          |          | -3.43104 |
| RPS26P11   |          |          |          |          | -3.43205 |

|          |          |          |          |          |          |
|----------|----------|----------|----------|----------|----------|
| CCAR1    | -1.81673 | -1.61559 |          |          |          |
| SNX6     |          |          |          |          | -3.43502 |
| DDX3X    |          |          |          |          | -3.43704 |
| RPS26    |          |          |          |          | -3.44696 |
| MRPS26   |          |          |          | -3.45324 |          |
| PSMD13   |          |          |          | -3.46632 |          |
| POLR3C   |          |          |          | -3.46868 |          |
| KRT16    |          |          |          | -3.47708 |          |
| SRSF2    |          |          |          |          | -3.48141 |
| ACYP1    |          |          |          |          | -3.48797 |
| STAU1    |          |          |          |          | -3.4887  |
| SNRPB    |          |          |          |          | -3.5004  |
| SNRPN    |          |          |          |          | -3.5004  |
| WARS2    |          |          |          |          | -3.50336 |
| CDK5RAP3 |          |          |          |          | -3.50359 |
| ZPR1     |          |          |          |          | -3.50776 |
| ZNF24    |          |          |          |          | -3.5127  |
| TMX1     |          |          |          |          | -3.52259 |
| SRSF8    |          |          |          |          | -3.55126 |
| CSTF2T   |          |          | -3.555   |          |          |
| DYNC1I2  |          |          |          | -3.56886 |          |
| RBBP6    |          |          | -3.59617 |          |          |
| UFL1     |          |          |          |          | -3.62016 |
| ZNF326   | -1.97816 | -1.64671 |          |          |          |
| DIS3     |          | -1.90975 |          | -1.72691 |          |
| XRCC1    |          |          | -1.1455  | -2.49524 |          |
| HOXA13   |          |          |          |          | -3.64491 |
| HOXC13   |          |          |          |          | -3.64491 |
| TXLNG    |          |          |          | -3.66183 |          |
| ACADM    |          |          |          | -2.56152 | -1.11827 |
| MLLT4    | -1.41889 | -1.13276 |          |          | -1.13229 |
| HECTD3   |          |          |          |          | -3.72409 |
| CLTB     |          |          |          |          | -3.73507 |
| HIBADH   |          |          |          | -3.74184 |          |
| PPP4C    |          |          |          |          | -3.78508 |
| RPS6KA3  |          |          |          |          | -3.79231 |
| SURF4    | -2.70421 |          | -1.09424 |          |          |
| TRIP12   |          |          | -2.17492 | -1.6313  |          |
| EIF2AK2  |          |          |          |          | -3.80849 |
| TFIP11   |          |          |          |          | -3.81579 |
| PPFIA1   |          |          |          | -3.82195 |          |
| CALU     |          |          |          |          | -3.82231 |
| CNBP     |          |          | -2.31735 | -1.51214 |          |
| CYB5B    | -2.13833 |          |          | -1.69774 |          |
| NME4     |          |          |          | -3.85053 |          |

|           |          |          |          |          |          |
|-----------|----------|----------|----------|----------|----------|
| RPTOR     |          |          |          | -3.85209 |          |
| XPO1      |          |          |          | -3.86861 |          |
| ARL8B     |          |          |          | -3.89402 |          |
| ADO       |          |          |          | -3.90859 |          |
| SUMF2     |          |          | -2.25588 |          | -1.65465 |
| PGRMC2    |          | -2.21803 |          | -1.70362 |          |
| PARN      |          |          |          | -3.93113 |          |
| SYNCRIP   | -2.19762 | -1.743   |          |          |          |
| PDHB      |          |          | -1.05296 | -2.89142 |          |
| UBR7      |          |          |          | -3.95849 |          |
| BLM       |          |          |          |          | -3.98184 |
| RECQL     |          |          |          |          | -3.98184 |
| PPM1A     |          | -4.01172 |          |          |          |
| PPM1B     |          | -4.01172 |          |          |          |
| EZH2      |          |          | -4.01851 |          |          |
| H2AFZ     | -2.48235 |          | -1.54095 |          |          |
| CPOX      |          |          | -4.03028 |          |          |
| MAP4      |          |          |          | -4.03182 |          |
| MEAF6     |          |          | -4.03853 |          |          |
| EXOC4     |          |          |          | -4.05024 |          |
| POLR2C    |          |          |          | -4.06338 |          |
| CIRBP     | -1.68602 |          | -2.3889  |          |          |
| LIN28B    |          |          |          |          | -4.07615 |
| C4orf27   |          |          |          |          | -4.10092 |
| FASN      |          |          |          |          | -4.12602 |
| GNG12     |          |          |          | -4.15533 |          |
| CALR      |          |          |          |          | -4.15868 |
| KIAA0101  |          |          | -4.17962 |          |          |
| EEF1E1    |          |          |          |          | -4.18144 |
| NDUFC2    |          |          |          |          | -4.18403 |
| PRPS2     |          |          |          |          | -4.18426 |
| PDHA1     | -2.21009 |          | -1.98701 |          |          |
| SCAF8     |          |          |          | -4.19766 |          |
| PPA2      | -1.49032 | -1.38529 |          |          | -1.32398 |
| ACAA1     | -1.47217 | -1.15649 | -1.57531 |          |          |
| TMA16     |          | -4.22697 |          |          |          |
| TALDO1    |          | -4.23275 |          |          |          |
| CCDC43    |          | -4.24178 |          |          |          |
| TBL3      | -1.54275 |          |          | -2.70846 |          |
| TRUB1     |          |          |          | -4.2708  |          |
| HSP90AA2P |          |          |          |          | -4.27412 |
| CYB5A     |          | -2.33338 | -1.9424  |          |          |
| RPL39     |          |          | -4.28311 |          |          |
| RPL39P5   |          |          | -4.28311 |          |          |
| RPL36     |          |          |          | -4.2835  |          |

|          |          |          |          |          |          |
|----------|----------|----------|----------|----------|----------|
| ANKFY1   |          |          |          | -4.29324 |          |
| NDUFA8   |          | -2.33454 |          | -1.9783  |          |
| ARHGAP17 |          |          |          |          | -4.31711 |
| ELP2     |          |          | -4.32408 |          |          |
| LBR      |          |          |          | -4.33215 |          |
| SMARCD1  |          |          |          | -4.34978 |          |
| OXSM     | -2.39439 |          |          | -1.95754 |          |
| UQCR10   | -2.00223 | -2.35803 |          |          |          |
| SLC25A11 | -1.86443 | -1.10765 |          |          | -1.39476 |
| UQCRFS1  |          | -2.07789 | -2.29524 |          |          |
| CHRA1    | -1.27144 | -1.74736 | -1.36014 |          |          |
| COX15    | -2.11758 |          |          |          | -2.26192 |
| FKBP8    |          |          | -1.01069 |          | -3.37283 |
| TSFM     |          |          |          | -4.38379 |          |
| VTA1     | -2.055   | -2.33322 |          |          |          |
| HDAC3    |          |          |          | -4.38967 |          |
| RPL9     |          | -2.27986 |          |          | -2.13205 |
| AMOTL2   |          |          |          |          | -4.42853 |
| TRUB1    |          | -4.43838 |          |          |          |
| MAGED2   | -2.06713 | -2.3916  |          |          |          |
| TCEB2    |          |          |          |          | -4.46867 |
| U2AF1    |          | -4.47581 |          |          |          |
| PHF3     |          |          | -2.11051 |          | -2.38098 |
| ZFR      |          |          |          | -4.4941  |          |
| LRBA     |          | -4.51033 |          |          |          |
| SH3BGR13 |          |          |          | -4.52144 |          |
| AGAP3    |          |          |          | -4.52213 |          |
| NFKB1    |          |          |          |          | -4.53294 |
| JUP      |          |          | -1.78991 |          | -2.75553 |
| SFXN1    |          |          |          |          | -4.54743 |
| XPNPEP1  |          |          |          |          | -4.55798 |
| SF3B1    |          |          |          |          | -4.57216 |
| CASP3    |          |          |          | -4.57589 |          |
| RPS29    |          |          |          |          | -4.57615 |
| U2AF1L4  |          |          | -2.777   |          | -1.80043 |
| ABCD3    |          | -2.26008 | -2.32592 |          |          |
| PLAA     |          |          |          |          | -4.59461 |
| YWHAB    |          |          |          | -4.5992  |          |
| TIMM13   |          |          |          | -4.60816 |          |
| TBC1D15  |          |          |          | -4.60841 |          |
| CEBPZ    |          | -3.38003 | -1.25068 |          |          |
| DCAF7    |          | -2.92246 |          | -1.71666 |          |
| KRT76    |          |          |          | -4.64438 |          |
| CTBP1    |          |          |          | -4.64995 |          |
| SDE2     |          |          | -4.65022 |          |          |

|                |          |          |          |          |          |
|----------------|----------|----------|----------|----------|----------|
| NOL7           |          |          |          | -4.66555 |          |
| GMPPA          |          |          |          | -4.66765 |          |
| NT5DC1         |          |          |          | -4.67206 |          |
| DDX18          | -1.51537 | -1.37748 |          | -1.79523 |          |
| EIF2B4         |          |          |          | -4.70733 |          |
| ERP29          |          | -1.11872 |          | -3.59091 |          |
| PDE12          | -2.15025 | -2.56032 |          |          |          |
| THUMPD3        |          |          |          | -4.71389 |          |
| KRT26          |          |          |          | -4.71562 |          |
| MAEA           |          |          |          | -4.72551 |          |
| PPAN-P2RY11    |          |          |          | -4.7386  |          |
| SRA1           |          |          |          | -4.76655 |          |
| TOMM20         | -2.21888 |          |          |          | -2.55522 |
| PNO1           |          |          |          | -4.78687 |          |
| MCM5           | -2.79547 |          |          | -2.01653 |          |
| VHL            |          |          | -4.81411 |          |          |
| AP3S1          |          |          |          | -4.81824 |          |
| POLDIP3        | -2.49825 |          |          |          | -2.32863 |
| TMEM33         |          |          |          | -4.82711 |          |
| TPM2           |          |          |          | -4.82843 |          |
| EIF3F          | -1.62669 | -1.40272 |          | -1.80361 |          |
| HNRNPUL2-BSCL2 |          | -1.13266 |          | -2.33118 | -1.37867 |
| CD81           | -2.13584 | -2.71173 |          |          |          |
| NNT            |          | -2.23606 |          |          | -2.61283 |
| USP39          |          |          |          | -4.84904 |          |
| RBM19          |          | -4.85682 |          |          |          |
| ASPH           | -2.24851 | -2.63497 |          |          |          |
| AHSG           |          |          |          | -4.88612 |          |
| TOR1AIP1       |          |          |          | -4.8882  |          |
| USP34          | -2.82085 |          | -2.08015 |          |          |
| PROSC          |          |          |          | -4.90439 |          |
| RCN2           | -2.22305 |          |          |          | -2.73821 |
| GGCT           |          |          |          | -4.96207 |          |
| RBM14          | -2.04076 | -2.92151 |          |          |          |
| NSA2           |          |          | -4.9708  |          |          |
| NVL            |          |          | -4.97567 |          |          |
| PSMC6          |          | -4.99497 |          |          |          |
| RTN1           | -3.29104 |          |          | -1.70514 |          |
| DNAJC7         |          |          | -1.8517  | -3.18239 |          |
| DHX29          |          |          |          | -5.04615 |          |
| TAF15          | -1.11609 | -1.711   |          | -2.22342 |          |
| BAX            |          |          |          | -5.05475 |          |
| RABL3          |          |          |          | -5.05571 |          |
| SLC25A31       | -1.3977  |          |          |          | -3.70341 |
| HNRNPPL        | -2.15736 |          |          |          | -2.96078 |



|          |          |          |          |          |          |
|----------|----------|----------|----------|----------|----------|
| CHMP2A   |          |          |          | -5.12912 |          |
| GARS     |          | -5.1418  |          |          |          |
| PRKCSH   |          |          |          | -3.88253 | -1.26171 |
| RALY     |          | -1.28507 |          | -1.75179 | -2.13179 |
| MT-CO2   | -2.41993 | -2.77347 |          |          |          |
| NDUFV2   | -1.26997 | -1.36095 |          | -2.57023 |          |
| PEF1     |          | -5.20455 |          |          |          |
| TPT1P8   |          | -5.22209 |          |          |          |
| KRT13    |          |          |          | -5.25169 |          |
| ACAD9    |          |          | -2.15766 | -3.10984 |          |
| RAVER1   |          |          |          |          | -5.30869 |
| NAA40    |          |          |          |          | -5.33189 |
| TARDBP   | -1.19714 |          |          |          | -4.18102 |
| TMED2    |          |          |          |          | -5.38251 |
| SAFB     | -2.16012 | -1.3745  |          | -1.85451 |          |
| TMEM33   |          | -5.39322 |          |          |          |
| CPD      |          | -2.70313 | -2.70265 |          |          |
| TRUB1    |          |          |          |          | -5.41943 |
| TAGAP    |          |          |          | -5.42428 |          |
| MAP2K3   |          |          |          |          | -5.43039 |
| MAP2K6   |          |          |          |          | -5.43039 |
| SH3BGR13 |          | -5.44046 |          |          |          |
| COPS3    |          | -5.48223 |          |          |          |
| BCL2L13  |          | -3.32675 |          | -2.17674 |          |
| ATAD3A   | -1.60541 | -1.15037 | -1.52031 |          | -1.24343 |
| ATP6V0C  | -2.73912 | -2.78425 |          |          |          |
| BCAT2    |          |          | -1.80275 | -1.56661 | -2.16978 |
| GEMIN4   |          | -5.54959 |          |          |          |
| ARID1A   |          | -5.56581 |          |          |          |
| HNRNPH1  |          |          |          |          | -5.59638 |
| THOC2    |          | -5.59912 |          |          |          |
| BCKDHA   |          | -5.63313 |          |          |          |
| TMEM9    |          | -5.68152 |          |          |          |
| TMEM9B   |          | -5.68152 |          |          |          |
| PLIN3    |          | -1.11877 | -1.985   | -2.60175 |          |
| RRP8     | -1.70817 |          |          |          | -4.00527 |
| CD99     |          | -5.71952 |          |          |          |
| U2SURP   | -2.10316 |          |          | -3.62931 |          |
| RPS25    | -5.80139 |          |          |          |          |
| RUVBL1   |          |          | -2.66818 | -1.8059  | -1.33291 |
| ATAD5    |          |          | -5.81575 |          |          |
| CD59     |          |          |          | -2.14399 | -3.67455 |
| EHMT1    |          |          | -5.84813 |          |          |
| MT1X     |          | -5.85808 |          |          |          |
| MT2A     |          | -5.85808 |          |          |          |

|         |          |          |          |          |          |
|---------|----------|----------|----------|----------|----------|
| NUP205  |          |          | -3.55359 |          | -2.33282 |
| TRA2B   |          | -5.89274 |          |          |          |
| KLC2    |          |          | -2.66411 |          | -3.23637 |
| HSPD1   |          | -2.79805 |          | -3.12388 |          |
| HAX1    |          | -2.69389 |          |          | -3.2492  |
| DDX47   |          | -2.62691 |          |          | -3.32607 |
| SMARCA4 |          |          | -2.73311 | -3.22152 |          |
| C2orf47 | -5.96365 |          |          |          |          |
| DHX40   |          |          |          | -6.00532 |          |
| KDM2A   |          |          |          | -6.05091 |          |
| RAP2A   | -2.07935 | -4.01827 |          |          |          |
| RAP2B   | -2.07935 | -4.01827 |          |          |          |
| RAP2C   | -2.07935 | -4.01827 |          |          |          |
| STRBP   |          |          |          | -3.01574 | -3.1323  |
| NOL6    | -2.55517 |          |          | -3.61345 |          |
| PYCR2   |          |          | -1.55106 | -4.66974 |          |
| TMEM230 |          |          |          | -3.00098 | -3.23006 |
| NOP2    |          |          | -1.54071 | -1.62757 | -3.07817 |
| TIMM50  |          |          | -1.08509 |          | -5.17657 |
| MRPL48  | -2.13757 |          | -1.9629  |          | -2.27709 |
| HMGCS1  |          | -1.30097 |          | -1.8795  | -3.21101 |
| TMEM261 |          | -4.09466 | -2.30723 |          |          |
| COX7A2L | -2.06724 | -2.24255 |          |          | -2.1101  |
| RSL1D1  |          |          |          | -3.17901 | -3.25101 |
| TXN2    |          | -2.421   | -1.84366 | -2.16848 |          |
| IPO5    |          |          |          | -3.14492 | -3.30814 |
| FAM21A  |          |          |          | -3.17259 | -3.29602 |
| FAM21B  |          |          |          | -3.17259 | -3.29602 |
| FAM21C  |          |          |          | -3.17259 | -3.29602 |
| COX7A2  | -2.07222 | -2.21869 |          |          | -2.20402 |
| RFC5    |          | -5.41493 | -1.10643 |          |          |
| NIT1    |          |          | -1.2565  | -5.35202 |          |
| NOSIP   |          |          |          | -3.5572  | -3.06229 |
| MTCH2   |          | -1.34063 | -1.57513 | -2.35446 | -1.38127 |
| STARD9  |          |          |          | -3.06675 | -3.61982 |
| FOXK2   |          |          |          | -3.53532 | -3.1841  |
| CSTF1   |          |          |          | -3.15913 | -3.56433 |
| NAT10   | -2.25839 |          | -1.93023 | -2.54465 |          |
| DHRS7   | -2.28325 |          |          | -2.20695 | -2.26981 |
| SPAG9   |          |          |          | -3.06006 | -3.71783 |
| PTBP1   | -3.70981 |          |          | -3.09116 |          |
| NELFE   |          |          |          | -3.10898 | -3.69972 |
| PAWR    |          |          |          | -3.30653 | -3.54287 |
| RPL34   |          |          |          | -3.53235 | -3.33301 |
| EXOC8   |          |          |          | -3.3176  | -3.55322 |

|          |          |          |          |          |          |
|----------|----------|----------|----------|----------|----------|
| LTV1     |          |          |          | -3.31905 | -3.55864 |
| KHDRBS2  | -2.10822 |          |          | -4.77704 |          |
| SUMO2    |          |          |          | -3.14314 | -3.74358 |
| WFS1     |          |          |          | -3.12814 | -3.78196 |
| MECP2    |          |          |          |          | -6.92443 |
| COA3     |          |          |          | -3.80588 | -3.15464 |
| DDX39A   |          |          |          | -3.01825 | -3.94828 |
| ASH1L    |          |          | -2.69874 | -4.29071 |          |
| MDN1     |          |          |          | -3.63795 | -3.36677 |
| RFC4     |          |          |          | -3.41543 | -3.62315 |
| MAGT1    |          |          |          | -3.27053 | -3.77396 |
| PHIP     |          |          |          |          | -7.05966 |
| ESYT2    |          |          |          | -3.42465 | -3.64985 |
| CMC2     | -2.21818 | -2.38715 |          |          | -2.47959 |
| CNN2     |          |          |          | -3.18052 | -3.95121 |
| PTMA     | -1.395   | -5.75057 |          |          |          |
| WDR36    |          | -2.84368 |          | -4.30302 |          |
| LMNB2    | -2.59598 | -2.65637 |          | -1.89723 |          |
| SLC4A1AP |          |          |          | -3.00956 | -4.1833  |
| RHOA     |          |          |          | -3.13484 | -4.07863 |
| RHOC     |          |          |          | -3.13484 | -4.07863 |
| TPX2     | -3.08298 | -4.16594 |          |          |          |
| NDUFV1   | -2.99511 |          | -2.43244 | -1.84207 |          |
| YWHAG    |          |          |          | -3.39118 | -3.87865 |
| INTS7    |          |          |          | -4.07894 | -3.1932  |
| AP2B1    |          |          |          | -3.24324 | -4.07281 |
| CLNS1A   |          |          |          | -3.11551 | -4.20326 |
| SLC7A5   |          |          |          | -3.17012 | -4.14879 |
| UQCRH    | -1.45192 | -1.17514 |          | -4.70018 |          |
| RAB25    |          |          |          | -3.17212 | -4.15641 |
| RRBP1    |          |          |          | -3.56851 | -3.77629 |
| TBCA     |          |          | -2.27609 |          | -5.09262 |
| IDH3A    |          |          |          | -3.30479 | -4.07024 |
| NDUFAB1  |          |          | -2.67535 | -2.03737 | -2.66465 |
| UQCRB    | -2.30159 | -2.38262 |          |          | -2.69701 |
| NCDN     |          |          |          | -3.49103 | -3.89492 |
| PTMS     |          |          |          | -3.7107  | -3.70088 |
| FKBP10   |          |          | -3.55708 | -2.18462 | -1.69113 |
| AIP      |          |          |          | -3.45806 | -3.97713 |
| PPP1R12A |          | -5.73357 |          |          | -1.75707 |
| RPL23    |          |          |          | -3.24746 | -4.25723 |
| WDR44    |          |          |          | -3.24214 | -4.26653 |
| CSNK1E   |          |          |          | -3.12889 | -4.39302 |
| RBM17    | -2.19874 | -2.2254  |          |          | -3.10311 |
| RPS4X    |          |          |          | -3.34056 | -4.19123 |

|          |          |          |          |          |          |
|----------|----------|----------|----------|----------|----------|
| RPL29    |          |          |          | -3.28229 | -4.2508  |
| TIA1     |          |          |          | -3.12812 | -4.4088  |
| KIAA0415 |          |          |          | -3.64867 | -3.89251 |
| ATP6AP2  | -2.33239 | -2.67079 |          |          | -2.53825 |
| MT-ATP6  |          |          |          | -2.29688 | -5.24547 |
| WDR41    |          | -4.086   |          | -3.47256 |          |
| GIN52    |          |          |          | -3.3788  | -4.20023 |
| UQCRHL   |          | -2.44412 |          | -5.14707 |          |
| TTC19    |          | -4.16135 |          |          | -3.4374  |
| ITPA     |          |          |          | -3.45766 | -4.16155 |
| ABHD14B  |          |          |          | -3.10897 | -4.52472 |
| WNK1     |          |          |          | -3.36277 | -4.29584 |
| SLC25A3  | -1.82749 | -1.57369 | -4.26902 |          |          |
| SAMM50   | -2.2448  | -2.26097 | -1.07063 |          | -2.17178 |
| MTX1     |          |          |          | -3.68037 | -4.07373 |
| CKAP2    |          |          |          | -3.47532 | -4.27892 |
| PAF1     |          | -4.00318 |          |          | -3.78314 |
| PRPF31   |          |          |          | -3.39862 | -4.41143 |
| LIMA1    |          |          | -1.84207 | -3.71416 | -2.28907 |
| MCM4     | -2.25471 | -5.59441 |          |          |          |
| AP3B2    |          | -4.5168  |          |          | -3.34889 |
| HRNR     |          |          |          | -3.05084 | -4.81883 |
| CD2BP2   |          |          |          | -3.43418 | -4.45231 |
| HNRNPK   |          |          |          | -4.12255 | -3.77508 |
| RBM26    |          |          |          | -4.73399 | -3.16759 |
| ILF3     |          | -1.70511 |          | -4.70543 | -1.49148 |
| PDCD5    | -2.12104 | -5.8223  |          |          |          |
| GTPBP6   |          |          |          | -3.39885 | -4.54457 |
| PLCG1    |          | -7.96511 |          |          |          |
| TRIP6    |          | -4.24489 |          | -3.7342  |          |
| AKR1B15  |          |          |          | -3.45482 | -4.53834 |
| SLAIN1   |          |          |          | -3.95419 | -4.09425 |
| PEX19    |          |          |          | -3.47768 | -4.5816  |
| PTTG1IP  |          |          |          | -3.8285  | -4.23669 |
| CDC37    |          |          | -2.66621 |          | -5.42974 |
| GPR180   |          | -4.13587 |          |          | -3.96937 |
| YWHAZ    |          |          |          | -4.42053 | -3.69965 |
| FARSA    |          |          | -4.02699 | -4.1994  |          |
| GNL2     |          | -4.31173 |          | -3.93002 |          |
| PSMD4    |          |          |          | -4.61839 | -3.62627 |
| LDHAL6A  |          | -8.25561 |          |          |          |
| MT1G     | -2.40236 | -5.85808 |          |          |          |
| MAP1B    |          | -4.05975 |          |          | -4.20494 |
| DNAJC10  |          | -4.30739 |          | -3.96035 |          |
| DDX27    | -3.1148  |          | -3.22569 | -1.92927 |          |

|          |          |          |          |          |          |
|----------|----------|----------|----------|----------|----------|
| LSM4     |          | -5.25875 |          |          | -3.01484 |
| RAB11A   |          |          |          | -5.04698 | -3.23679 |
| EIF3K    |          | -3.00265 |          | -2.74588 | -2.55473 |
| H3F3C    | -2.75761 |          |          | -2.36342 | -3.19092 |
| RABGGTB  |          |          |          | -3.53706 | -4.7778  |
| SRP9     |          |          |          | -4.74538 | -3.58857 |
| NKAPL    |          | -4.88678 |          | -3.46807 |          |
| PLAA     |          | -4.31177 |          | -4.07584 |          |
| PTGES2   |          |          |          | -3.66506 | -4.72322 |
| YWHAQ    |          |          |          | -4.08177 | -4.35623 |
| HMOX1    |          | -5.7123  | -2.73206 |          |          |
| HIST1H1C |          |          | -2.40476 | -6.08997 |          |
| COX6C    | -2.81842 |          | -1.71594 |          | -3.96451 |
| CKAP5    |          |          |          | -3.74204 | -4.76417 |
| GUK1     |          | -4.49596 |          |          | -4.06162 |
| SBDS     |          | -4.84746 |          | -3.72805 |          |
| AMOTL1   |          | -4.14956 |          |          | -4.42853 |
| ANXA2    |          | -4.839   |          | -3.74508 |          |
| BTF3     |          | -5.63142 |          | -2.96992 |          |
| CBS      | -1.63566 | -5.75762 |          |          | -1.23532 |
| COX6A1   | -3.98046 | -4.65076 |          |          |          |
| AGO1     |          |          |          | -8.65215 |          |
| AGO2     |          |          |          | -8.65215 |          |
| SRSF7    |          |          | -1.13101 | -3.43668 | -4.08921 |
| PDIA4    |          |          |          | -3.93264 | -4.74989 |
| SLC25A1  | -1.50294 | -5.60842 | -1.60133 |          |          |
| CISD2    |          | -2.35429 | -2.07909 |          | -4.31148 |
| GART     |          |          |          | -5.25238 | -3.51233 |
| MAP2K2   |          | -4.05906 |          |          | -4.71988 |
| GIN51    |          | -4.85955 |          | -3.95648 |          |
| PUM1     |          |          |          | -4.8133  | -4.01103 |
| PUM2     |          |          |          | -4.8133  | -4.01103 |
| TROVE2   |          | -4.14842 |          |          | -4.68103 |
| CYC1     | -2.15197 | -2.23469 |          | -1.92864 | -2.52988 |
| TMUB1    |          | -5.05682 |          | -3.82673 |          |
| CHEK1    |          | -4.51662 |          | -4.38117 |          |
| MRPS14   |          |          | -2.12948 | -3.51832 | -3.25495 |
| C1orf131 |          | -4.53457 |          |          | -4.39226 |
| CDK9     |          | -4.87376 |          | -4.0882  |          |
| IST1     |          | -5.13033 |          | -3.8535  |          |
| CCDC40   |          |          | -4.82984 |          | -4.16978 |
| GLMN     |          |          |          | -5.04418 | -3.97501 |
| HP1BP3   |          |          | -3.14241 | -5.88943 |          |
| SAP18    | -3.49771 |          | -2.18656 |          | -3.35724 |
| RPL8     |          | -4.84678 |          | -4.20286 |          |

|              |          |          |          |          |          |
|--------------|----------|----------|----------|----------|----------|
| GTF3C2       |          | -4.60952 |          | -4.45098 |          |
| H3F3A        | -2.12328 | -2.23795 |          | -4.71127 |          |
| H3F3B        | -2.12328 | -2.23795 |          | -4.71127 |          |
| SYNGR1       |          | -5.02074 |          | -4.07627 |          |
| OGT          |          | -4.92156 | -4.24194 |          |          |
| BRD4         |          | -5.02508 | -4.14031 |          |          |
| RPS15        |          |          |          | -4.86189 | -4.30683 |
| NEFH         | -2.87052 | -4.17303 |          |          | -2.16106 |
| NEFL         | -2.87052 | -4.17303 |          |          | -2.16106 |
| TPM3         |          | -4.39601 |          |          | -4.82147 |
| HBA1         | -2.50671 | -2.53685 |          | -1.56821 | -2.62687 |
| SUB1         |          | -5.57142 |          |          | -3.69733 |
| VDAC2        | -2.30841 | -2.82183 | -1.81102 |          | -2.38939 |
| RANBP9       |          |          |          | -4.73833 | -4.60493 |
| RRAS2        |          |          |          | -4.17827 | -5.17082 |
| DKFZp434B156 |          | -4.63979 |          |          | -4.71204 |
| WDR92        |          | -4.63979 |          |          | -4.71204 |
| SEC62        |          |          |          | -4.84079 | -4.55023 |
| VDAC1        | -2.53362 | -2.92457 | -1.78329 |          | -2.15886 |
| ST13         |          |          |          | -4.78378 | -4.63474 |
| SOAT1        |          | -3.49965 | -3.48529 |          | -2.46681 |
| RUFY2        |          | -4.60552 |          | -4.88068 |          |
| GPATCH11     |          |          |          |          | -9.49448 |
| RBM39        |          | -4.49496 | -3.17059 | -1.83783 |          |
| LMNA         | -3.79581 |          | -5.72582 |          |          |
| RAC2         |          | -5.57203 |          | -3.96436 |          |
| RHOJ         |          | -5.57203 |          | -3.96436 |          |
| RHOQ         |          | -5.57203 |          | -3.96436 |          |
| CEP41        |          | -5.141   |          |          | -4.42394 |
| YLPM1        | -2.45473 | -5.40533 |          |          | -1.71539 |
| SF3A2        |          | -4.4419  |          |          | -5.13753 |
| CTBP2        |          |          |          | -4.49793 | -5.16507 |
| PPHLN1       |          | -5.10481 |          |          | -4.57532 |
| HMGA2        |          | -3.65848 | -6.02335 |          |          |
| TNPO3        |          |          |          |          | -9.70358 |
| HBA2         | -2.72749 | -2.92646 |          | -1.61603 | -2.4367  |
| TRIAP1       |          | -5.35211 |          | -4.35707 |          |
| RPS27L       |          | -5.29828 |          | -4.42754 |          |
| ARL2BP       |          | -4.7356  |          |          | -4.99929 |
| HM13         |          | -5.05068 |          |          | -4.69261 |
| MGST3        | -3.14725 | -2.9052  |          | -1.57709 | -2.11466 |
| DNAJB2       |          | -4.84711 |          |          | -4.9008  |
| DNAJB8       |          | -4.84711 |          |          | -4.9008  |
| DNAJC11      | -3.65274 | -3.00881 |          |          | -3.1818  |
| PPARGC1A     |          |          |          |          | -9.84385 |

|         |          |          |          |          |          |
|---------|----------|----------|----------|----------|----------|
| CLTA    |          | -5.30729 |          | -4.54192 |          |
| HGS     |          | -5.25833 |          | -4.5978  |          |
| SF3B3   |          |          |          | -4.62915 | -5.25897 |
| EPS15L1 |          | -2.87605 | -7.09056 |          |          |
| PES1    |          | -5.55959 |          | -4.42919 |          |
| CRYZL1  |          |          |          | -4.83561 | -5.18759 |
| SKIV2L2 |          |          |          | -4.69759 | -5.35572 |
| MEPCE   |          | -5.42665 |          | -4.63997 |          |
| TFRC    |          | -5.57094 |          | -4.49902 |          |
| RBM28   |          |          |          | -3.00508 | -7.07548 |
| NUP98   |          | -5.01518 |          | -5.07406 |          |
| KPNB1   | -3.16513 |          |          | -3.0591  | -3.90285 |
| FSCN1   |          | -5.6395  |          | -4.49059 |          |
| DDX4    |          | -4.80487 |          |          | -5.36272 |
| MRPS28  |          | -5.12944 |          |          | -5.08914 |
| LSM8    |          |          |          | -4.97028 | -5.25816 |
| CPSF7   |          | -5.69817 |          | -4.5391  |          |
| RAB1C   | -5.91716 |          | -2.5459  | -1.79511 |          |
| NCL     |          | -5.16809 |          |          | -5.13221 |
| STX7    |          | -5.65907 |          | -4.68951 |          |
| MT1E    |          | -5.65408 |          | -4.70997 |          |
| MT1M    |          | -5.65408 |          | -4.70997 |          |
| CDCA8   |          |          | -5.2425  |          | -5.13705 |
| CHAMP1  | -2.23695 |          | -2.9058  | -2.21022 | -3.02848 |
| WDR18   |          | -5.24793 |          |          | -5.16225 |
| RRP12   | -2.08871 | -4.06382 |          |          | -4.26062 |
| GNG5    |          | -5.57425 |          | -4.84613 |          |
| FAM175B |          |          |          | -5.1112  | -5.32811 |
| SNW1    |          | -5.64928 |          | -4.80456 |          |
| PLD3    |          | -5.40644 |          |          | -5.06644 |
| RAB11B  |          |          |          | -5.04698 | -5.45634 |
| DDX56   |          |          | -5.34119 | -5.17294 |          |
| WHSC1   |          | -5.16936 |          |          | -5.36385 |
| VASP    |          | -5.70242 |          | -4.8337  |          |
| RNF2    | -2.33388 | -2.36074 |          | -1.98143 | -3.86897 |
| EIF4G2  |          | -5.48206 |          |          | -5.08561 |
| MRPL17  |          |          | -1.97804 | -3.95169 | -4.64126 |
| HMGNA4  |          |          | -2.72288 | -7.87682 |          |
| MTDH    | -1.90429 |          |          | -3.49204 | -5.22578 |
| MOV10   |          | -5.68855 |          | -4.93964 |          |
| UBE2Z   |          | -5.697   |          | -4.94406 |          |
| RPL36AL |          | -5.67877 |          | -4.96381 |          |
| 39692   |          | -5.68145 |          | -4.96534 |          |
| UBE2M   |          | -4.54843 | -1.93107 | -4.1678  |          |
| EDC3    |          | -5.75713 |          | -4.90637 |          |

|         |          |          |          |          |          |
|---------|----------|----------|----------|----------|----------|
| COX6B1  |          | -5.9008  |          | -4.83895 |          |
| SLC1A5  |          | -5.35869 |          |          | -5.40056 |
| BZW1    |          | -5.44741 |          |          | -5.33136 |
| RBMX    |          | -5.53896 |          |          | -5.2477  |
| COX7C   |          | -2.76849 | -2.31884 | -1.65038 | -4.06832 |
| DLST    | -2.48366 | -2.4251  | -2.5143  |          | -3.39986 |
| TCOF1   | -1.45164 | -4.49974 |          |          | -4.93249 |
| POLB    |          | -7.79241 | -3.1356  |          |          |
| SNRPC   |          | -5.67795 |          |          | -5.37456 |
| MRPS18B | -2.90244 | -2.86728 |          | -2.89248 | -2.41458 |
| SUMO3   |          | -4.06265 |          | -3.18767 | -3.89006 |
| UQCRCQ  | -2.11449 |          | -4.67424 | -1.56468 | -2.81289 |
| GAA     |          | -4.06222 |          | -3.24698 | -3.85976 |
| HK1     |          | -4.09056 |          | -3.54464 | -3.55586 |
| SUGP2   |          | -4.41057 |          | -3.24987 | -3.54935 |
| RBX1    |          | -5.77827 |          |          | -5.44682 |
| RPL28   |          | -4.23497 |          | -3.82166 | -3.18338 |
| ZMYND8  |          | -7.02508 | -4.37559 |          |          |
| RPL31   |          | -4.06908 |          | -3.75689 | -3.62684 |
| HADHB   |          | -4.07579 |          | -3.30736 | -4.07987 |
| PELP1   |          | -4.07796 |          | -3.23482 | -4.15884 |
| RPS11   |          | -4.09635 |          | -3.86837 | -3.59124 |
| ARF4    |          | -4.09117 |          | -3.37664 | -4.0977  |
| TEX264  |          | -5.50303 |          | -4.673   | -1.51501 |
| SON     |          |          | -1.91385 | -4.93533 | -4.85748 |
| RAB1B   |          |          | -2.13808 | -5.01685 | -4.60889 |
| CHP1    |          | -5.28051 |          | -3.95732 | -2.56045 |
| FAH     |          | -5.1045  |          | -3.01662 | -3.75371 |
| DDX54   |          | -4.23121 |          | -3.12502 | -4.52775 |
| NOLC1   | -1.35961 | -5.73305 |          | -4.85054 |          |
| RPL36A  |          | -4.42927 |          | -4.15136 | -3.36456 |
| P3H1    |          | -4.0658  |          | -3.24516 | -4.64703 |
| LEPRE1  |          | -4.0658  |          | -3.49117 | -4.41562 |
| APIP    |          | -5.75006 |          |          | -6.28807 |
| DPP9    |          | -4.628   |          | -3.3206  | -4.09365 |
| PPIH    |          | -4.06963 |          | -4.36541 | -3.63771 |
| COASY   |          | -4.06602 |          | -3.46803 | -4.55141 |
| MARCKS  |          | -4.3254  |          | -3.57386 | -4.22823 |
| NIN     |          | -4.08223 |          | -3.45684 | -4.63058 |
| SUCLG1  |          | -4.25366 |          | -3.38215 | -4.55791 |
| NDUFA2  |          |          |          | -5.37595 | -6.82106 |
| SAR1B   |          | -4.30769 |          | -3.1988  | -4.73889 |
| ATXN2L  |          | -5.6015  |          | -4.98815 | -1.71639 |
| MPP6    |          | -4.22852 |          | -3.31354 | -4.81562 |
| REXO2   |          | -4.14807 |          | -3.63487 | -4.6216  |



|          |          |          |          |          |          |
|----------|----------|----------|----------|----------|----------|
| SEC31A   |          |          | -7.1201  |          | -5.3122  |
| TSPAN6   | -3.15139 | -3.43666 | -2.16084 |          | -3.84898 |
| MINOS1   | -2.92028 | -3.00144 | -1.87482 | -1.84714 | -2.97948 |
| UTS2     |          | -4.74526 |          | -3.31108 | -4.57745 |
| TOMM40   | -3.06733 | -2.23684 | -4.87165 |          | -2.46254 |
| NDRG3    |          | -6.44112 | -6.21141 |          |          |
| RPS23    |          | -5.02267 |          | -4.46723 | -3.22179 |
| TIMM9    | -2.7743  | -3.23198 | -1.96532 | -1.54536 | -3.19724 |
| ATP5D    |          | -4.71738 |          | -3.42953 | -4.59229 |
| RCN1     |          | -5.86473 | -5.18567 | -1.7513  |          |
| SRPK3    |          | -4.3332  |          | -3.73565 | -4.73814 |
| POR      |          | -4.53556 |          | -3.72029 | -4.60571 |
| LDHC     |          | -4.32451 |          | -3.8309  | -4.71956 |
| SEC63    |          | -4.76043 |          | -3.75306 | -4.40971 |
| BRD2     | -2.34625 | -2.28683 | -3.44393 | -1.57751 | -3.31565 |
| EIF3G    |          | -4.03649 |          | -4.68852 | -4.31772 |
| GSTM2    |          | -4.6047  |          | -3.66107 | -4.8046  |
| GSTM5    |          | -4.6047  |          | -3.66107 | -4.8046  |
| PCBP2    |          | -4.24451 |          | -4.34613 | -4.57209 |
| RPL10    | -2.01409 | -5.72739 |          |          | -5.44023 |
| FAM136A  | -2.05619 | -4.64206 | -1.89956 |          | -4.64167 |
| STIM2    |          | -4.89143 |          | -3.65666 | -4.77094 |
| GIPC1    |          | -4.5397  |          | -3.82047 | -4.97017 |
| DHCR7    |          | -4.39681 |          | -4.15341 | -4.79363 |
| LAMP1    |          | -4.47683 |          | -4.07177 | -4.80425 |
| AKAP12   |          | -4.41787 |          | -4.0751  | -4.91019 |
| DEK      |          | -5.78112 | -1.94338 | -1.8031  | -3.89237 |
| GFAP     | -2.64665 | -4.53738 | -3.99645 | -2.26319 |          |
| C11orf98 |          | -4.16106 |          | -4.73401 | -4.58209 |
| CUL3     |          | -4.38649 |          | -4.38975 | -4.7468  |
| RPL37A   |          | -4.49149 |          | -4.30362 | -4.73411 |
| GNAI2    |          | -5.05678 |          | -3.81338 | -4.69627 |
| MECR     |          | -4.9728  |          | -3.75859 | -4.87063 |
| OXCT1    |          | -4.63161 |          | -4.13724 | -4.86413 |
| SEC61A1  |          | -4.66178 |          | -4.28688 | -4.71282 |
| SEC61A2  |          | -4.72953 |          | -4.28688 | -4.76385 |
| CAP1     |          | -5.38433 |          | -5.23839 | -3.20845 |
| UGDH     |          | -5.01554 |          | -3.7477  | -5.08656 |
| SDAD1    |          | -4.25271 |          | -5.14734 | -4.45345 |
| PTBP2    |          |          |          | -7.02535 | -6.8366  |
| IDH2     |          | -4.95027 |          | -4.18505 | -4.72868 |
| TOMM22   | -2.28308 | -4.30146 | -2.08185 |          | -5.20308 |
| ATXN2    |          | -4.52649 |          | -4.69733 | -4.66636 |
| EIF4B    |          | -4.7178  |          | -4.38881 | -4.78759 |
| PNPT1    |          | -5.0439  |          | -4.17426 | -4.70661 |

|          |          |          |          |          |          |
|----------|----------|----------|----------|----------|----------|
| CHMP1A   |          | -4.42856 |          | -4.70928 | -4.82755 |
| SNRPD2   |          | -4.05667 |          | -5.22175 | -4.72206 |
| MMS19    |          | -4.49643 |          | -4.49933 | -5.03348 |
| CDC42    |          | -4.92876 |          | -4.28839 | -4.86137 |
| HARS2    |          | -5.03531 |          | -4.04506 | -5.09817 |
| MRPL12   | -2.04634 | -5.88883 | -1.18183 | -5.06965 |          |
| CLPTM1   |          | -4.89544 |          | -4.36164 | -4.96857 |
| WARS     |          | -4.75253 |          | -4.6263  | -4.86475 |
| ARFIP2   |          | -5.10755 |          | -4.2102  | -4.95206 |
| RPA2     |          | -4.81456 |          | -4.22974 | -5.32955 |
| CHMP2B   |          | -5.13502 | -2.03458 | -3.13415 | -4.08104 |
| NDUFB11  |          | -5.20045 |          | -4.18187 | -5.01165 |
| EPHA1    | -6.26831 |          |          | -4.0743  | -4.06859 |
| DPM3     |          | -5.25123 |          | -4.27561 | -4.89013 |
| SLC35A4  |          | -5.3384  |          | -4.1907  | -5.00722 |
| RPL37AP8 |          | -5.22795 |          | -4.16979 | -5.14358 |
| FTH1     |          | -5.22908 |          | -4.45327 | -4.86123 |
| RDX      |          | -4.14441 | -1.64209 | -4.38709 | -4.40888 |
| PICALM   |          | -5.05316 |          | -4.56811 | -4.96402 |
| ARPC3    |          | -5.09544 |          | -4.36831 | -5.15753 |
| DDX3Y    |          | -5.08661 |          | -4.54167 | -4.99445 |
| HCFC2    |          | -5.26044 |          | -4.33127 | -5.08168 |
| PTGES3   |          | -5.30283 |          | -4.39515 | -5.07585 |
| REEP5    |          | -5.83261 |          | -5.19482 | -3.75053 |
| RBM34    | -3.8921  | -3.50372 | -2.50876 | -2.1255  | -2.74909 |
| MATR3    |          | -5.32108 |          | -4.42417 | -5.07043 |
| UBE2C    |          | -5.14944 |          | -4.42236 | -5.25073 |
| PSMB7    |          | -4.96915 |          | -4.41089 | -5.45651 |
| HNRNPM   |          | -4.70853 | -2.98092 | -3.54394 | -3.60499 |
| BCLAF1   |          | -4.0649  | -2.94167 | -3.36038 | -4.48002 |
| UFM1     |          | -5.19118 |          | -4.40005 | -5.2638  |
| NEMF     |          | -5.28942 |          | -4.66339 | -4.98257 |
| IQGAP3   |          | -5.52992 |          | -4.20857 | -5.21442 |
| RPL13    |          | -5.27446 |          | -4.83607 | -4.87123 |
| DPYSL5   |          | -5.27055 |          | -4.44352 | -5.27812 |
| TARS     |          | -5.45412 |          | -4.40651 | -5.16896 |
| HGH1     |          | -5.43261 |          | -4.53145 | -5.07159 |
| M6PR     | -6.04555 |          | -3.98995 | -5.0373  |          |
| GNB3     |          | -5.3995  |          | -4.58742 | -5.11406 |
| GNB4     |          | -5.3995  |          | -4.58742 | -5.11406 |
| RAD23A   |          | -5.33987 |          | -4.46506 | -5.29901 |
| 40057    |          | -5.46499 |          | -4.50708 | -5.14838 |
| IMPDH1   |          | -5.45426 |          | -4.47254 | -5.21175 |
| EXOSC4   |          | -5.42979 |          | -4.48563 | -5.23036 |
| ATP1A1   | -2.524   | -5.66697 | -1.60389 |          | -5.41985 |

|            |          |          |          |          |          |
|------------|----------|----------|----------|----------|----------|
| CAPZA2     |          | -5.48623 |          | -4.60675 | -5.21904 |
| MRPS5      |          | -5.56579 |          | -4.61271 | -5.15872 |
| UBL5       |          | -5.33386 |          | -4.69828 | -5.3341  |
| NPM1       |          | -5.08287 | -2.22782 | -3.04395 | -5.05716 |
| ACTR3B     |          | -5.7271  |          | -4.39891 | -5.32881 |
| COMT       |          | -5.71595 |          | -4.57047 | -5.18447 |
| HDGFRP2    | -5.26517 | -5.70614 |          | -4.50539 |          |
| SNRNP70    |          | -5.57603 |          | -4.68392 | -5.22716 |
| CKMT1A     | -2.3101  | -5.85969 | -1.84    |          | -5.50847 |
| CKMT1B     | -2.3101  | -5.85969 | -1.84    |          | -5.50847 |
| ADRM1      |          | -5.44569 |          | -4.69544 | -5.391   |
| RBBP4      |          | -5.48494 |          | -4.79432 | -5.27444 |
| RBBP7      |          | -5.48494 |          | -4.79432 | -5.27444 |
| CKMT2      | -2.3101  | -5.85969 | -1.89499 |          | -5.50847 |
| SACM1L     |          | -5.55736 |          | -4.73477 | -5.32369 |
| DENR       |          | -5.63939 |          | -5.10305 | -4.89386 |
| RPL30      |          | -5.54595 |          | -4.76832 | -5.32568 |
| MRPL43     |          | -5.66423 |          | -4.75568 | -5.23463 |
| SNRPA      |          | -5.56998 |          | -4.84685 | -5.24271 |
| DDX46      |          | -5.62514 |          | -4.77444 | -5.27114 |
| SP100      |          | -5.49745 |          | -4.88202 | -5.29697 |
| YTHDF1     |          | -5.5768  |          | -4.77046 | -5.37453 |
| NUDT4      |          | -5.64325 |          | -4.72062 | -5.37497 |
| CS         | -2.24014 | -5.52664 |          | -4.70282 | -3.32916 |
| SPTLC1     |          | -5.56894 |          | -4.85376 | -5.38499 |
| NEFM       | -2.87052 | -3.50362 |          | -4.50024 | -4.94739 |
| STAU2      |          | -5.60862 |          | -4.83702 | -5.37716 |
| ARF5       |          | -5.65143 |          | -4.79241 | -5.38654 |
| PSMA1      |          | -5.546   |          | -4.84956 | -5.43485 |
| C14orf166  |          | -5.6902  |          | -4.79525 | -5.35687 |
| TRAP1      |          | -5.62501 |          | -4.88721 | -5.33105 |
| USP47      |          | -5.63435 |          | -4.90651 | -5.32244 |
| EIF4A3     |          | -5.60138 |          | -4.8479  | -5.51706 |
| ME3        |          | -5.64892 |          | -4.92704 | -5.39613 |
| RPS3       |          | -5.70902 |          | -4.85466 | -5.43766 |
| SNRPF      |          | -5.73926 |          | -5.14189 | -5.33137 |
| OPA1       |          | -5.7994  |          | -5.16309 | -5.28601 |
| TCEA2      |          | -5.79077 |          | -5.05073 | -5.49063 |
| PRPF40A    | -1.68373 | -5.18964 |          | -4.61975 | -5.10291 |
| CD63       | -3.44268 | -3.69317 | -3.23669 | -2.8397  | -3.47028 |
| SF1        |          | -5.22209 | -2.19975 | -4.36768 | -5.07027 |
| NOMO1      |          | -5.51891 | -1.09195 | -5.13443 | -5.27709 |
| PRRC2C     | -1.56179 |          |          | -7.61845 | -8.41453 |
| PHB2       | -1.86453 | -5.74685 |          | -4.81701 | -5.25121 |
| UQCRCF51P1 |          | -5.66671 | -2.21142 | -4.53859 | -5.26609 |

|               |          |          |          |          |          |
|---------------|----------|----------|----------|----------|----------|
| DBN1          | -1.28424 | -5.11847 | -2.24577 | -4.05272 | -5.01118 |
| RUFY1         |          | -4.60552 | -1.68794 | -4.88068 | -6.5686  |
| RUFY3         |          | -4.60552 | -1.68794 | -4.88068 | -6.5686  |
| PLRG1         |          | -5.75876 | -1.86596 | -4.91366 | -5.24453 |
| JAGN1         | -1.59523 | -5.78354 |          | -4.99844 | -5.42537 |
| ATPIF1        | -2.46938 | -5.39197 |          | -4.93296 | -5.06111 |
| TSC2          |          | -4.64575 | -3.29363 | -4.72018 | -5.23535 |
| DKFZp434B2017 |          | -4.30769 | -5.75457 | -3.1988  | -4.73889 |
| EIF3H         | -1.49807 | -5.56097 | -5.60409 |          | -5.36799 |
| PNN           | -2.17213 | -5.66261 |          | -4.92362 | -5.37639 |
| GLS           | -3.29643 | -2.92437 | -3.29424 | -4.94899 | -3.70304 |
| IMMT          | -1.36714 | -5.81508 | -1.31111 | -5.04069 | -5.14899 |
| YY2           | -2.58352 | -5.71604 |          | -4.96666 | -5.42228 |
| NME1          |          | -5.17076 | -5.52859 | -3.06628 | -5.12523 |
| YY1           | -2.96481 | -5.7204  |          | -5.05237 | -5.42446 |
| CNNM3         |          | -5.70257 | -3.45691 | -4.35879 | -5.87534 |
| SETBP1        | -4.63812 | -4.44592 | -2.86359 | -2.62184 | -5.06662 |
| ERH           | -1.20376 | -5.72022 | -3.42412 | -4.36445 | -5.29725 |
| EBP           |          | -9.37221 |          | -8.51453 | -2.17    |
| TLE4          |          |          | -6.4333  | -6.94597 | -7.27674 |
| SMARCE1       |          | -4.75258 | -4.76505 | -5.00203 | -6.13952 |
| SLC25A24      | -9.53643 | -5.10331 |          | -4.55124 | -2.16841 |
| NDUFS6        | -2.35716 | -6.13723 | -2.40031 | -6.16306 | -4.64045 |
| TJP1          | -9.28902 | -1.67118 | -1.93635 | -5.88508 | -4.65555 |
| NUMA1         |          | -6.06183 | -3.38665 | -6.61923 | -7.56077 |
| CBX1          | -9.43251 | -4.51135 | -3.71741 | -3.66025 | -2.40244 |
| THOC5         | -4.52908 | -4.64561 | -5.09969 | -4.86277 | -4.91247 |
