# Supplementary material for: GPR19 Coordinates Multiple Molecular Aspects of Stress Responses Associated with the Aging Process
Source: Int J Mol Sci. 2023 May 9;24(10):8499. doi: 10.3390/ijms24108499 (PMC10218176; doi:10.3390/ijms24108499)
Supplement: Supplementary file 1 [file ijms-24-08499-s001.zip]

Archive with 13 entries (13 files):
- Data-Supplement-Maudsley-et-al-2023-Figure-S1.pdf
- Data-Supplement-Maudsley-et-al-2023-Figure-S2.pdf
- Data-Supplement-Maudsley-et-al-2023-Figure-S3.pdf
- Data-Supplement-Maudsley-et-al-2023-Table-S1.pdf
- Data-Supplement-Maudsley-et-al-2023-Table-S10.xlsx
- Data-Supplement-Maudsley-et-al-2023-Table-S2.pdf
- Data-Supplement-Maudsley-et-al-2023-Table-S3.pdf
- Data-Supplement-Maudsley-et-al-2023-Table-S4.pdf
- Data-Supplement-Maudsley-et-al-2023-Table-S5.pdf
- Data-Supplement-Maudsley-et-al-2023-Table-S6.pdf
- Data-Supplement-Maudsley-et-al-2023-Table-S7.pdf
- Data-Supplement-Maudsley-et-al-2023-Table-S8.xlsx
- Data-Supplement-Maudsley-et-al-2023-Table-S9.xlsx
