# Supplementary material for: GPR19 Coordinates Multiple Molecular Aspects of Stress Responses Associated with the Aging Process
Source: Int J Mol Sci. 2023 May 9;24(10):8499. doi: 10.3390/ijms24108499 (PMC10218176; doi:10.3390/ijms24108499)
Supplement: Supplementary file 1 [file ijms-24-08499-s001.zip › Data-Supplement-Maudsley-et-al-2023-Table-S9.xlsx]

## Sheet: Table S9
		Data Supplement													Table S9. Venn diagram separation of the differentially expressed plasma membrane proteins from various GPR19 expression levels (0.5, 1, 2, 5, 10mg).
		GPR19 coordinates multiple molecular aspects of stress responses associated with the aging process
		Stuart Maudsley 1*, Claudia Schrauwen1, İrem Harputluoğlu1, Deborah Walter1, Hanne Leysen1, Patricia McDonald2
		1	Receptor Biology Lab, Department of Biomedical Science, University of Antwerp.
		2	H. Lee Moffitt Cancer Center, Tampa, FL, USA
		* Corresponding Author: Prof. Stuart Maudsley – stuartmaudsley@uantwerpen.be: receptorbiologylab@gmail.com
															[1.0 GPR19 CE2] and [2.0 GPR19 CE2] and [10.0 GPR19 CE2]: TSPYL1,C12orf43,IDH1,CBR1,CBR3,DYNC1LI1,DYNLRB1,CISD2,SOAT1
															[2.0 GPR19 CE2] and [10.0 GPR19 CE2]: GLYR1,PPAN,CDKN2A,CDKN2B,DKFZp686E0752,HIST2H2AC,CANX,RBM25,HMGN2,ANXA5,HDAC6,PDHX,TLN1,HBS1L,SLC9A3R1,UBL4A,MKI67,HTATSF1,BRIX1,CCDC86,FKBP8,TIMM50,NIPSNAP1,MRPS25,BCAP31,BLMH,GADD45GIP1,JUP,CHTOP,SLC25A10,PHF3,SUMF2,TBCA,KLC2,CDC37,U2AF1L4,NUP205,CCDC40,CDCA8,SEC31A
															[1.0 GPR19 CE2] and [2.0 GPR19 CE2] and [5.0 GPR19 CE2] and [10.0 GPR19 CE2]: ZKSCAN7,KLF12,KLF3,KLF5,KLF7,MYNN,ZSCAN16,ZSCAN2,EIF4G1,MTCH2,COX7C,BCLAF1,RDX,DKFZp434B2017,RUFY1,RUFY3,TSC2,HNRNPM,SMARCE1,NPM1,CHMP2B,NME1,SF1,NOMO1,UQCRFS1P1,CNNM3,SNRPF,PLRG1,DEK,NUMA1
															[2.0 GPR19 CE2] and [5.0 GPR19 CE2] and [10.0 GPR19 CE2]: CTTN,SMC4,NSFL1C,ATP1A2,HIST2H2AA3,IK,EIF2S1,SRSF7,NOP2,BCAT2,LIMA1,SON,MRPL17,MRPS14,RAB1B,RUVBL1,NDUFAB1,FKBP10,TLE4
															[2.0 GPR19 CE2] and [5.0 GPR19 CE2]: SDHA,CIAO1,STAG2,LCP1,PPM1G,RBM3,PDHB,XRCC1,NIT1,PYCR2,MRPL49,DNAJC7,ACAD9,TRIP12,CNBP,HIST1H1C,ASH1L,HMGN4,SMARCA4,HP1BP3,FARSA,DDX56
															[1.0 GPR19 CE2] and [5.0 GPR19 CE2]: MYH14,EIF5B,ERP29,NUP214,GNB2L1,ATP5A1,DIS3,PGRMC2,NDUFA8,UQCRHL,HSPD1,WDR36,DCAF7,BCL2L13,WDR41,TRIP6,DNAJC10,GNL2,CHEK1,RUFY2,GTF3C2,ANXA2,RPL8,SBDS,GINS1,CDK9,NKAPL,NUP98,SYNGR1,TMUB1,IST1,HGS,RPS27L,CLTA,TRIAP1,TMEM33,MEPCE,SH3BGRL3,PES1,TFRC,RAC2,RHOJ,RHOQ,BTF3,FSCN1,SNW1,MT1E,MT1M,STX7,RPL36AL,39692,MOV10,UBE2Z,CPSF7,VASP,EDC3,COX6B1
															[1.0 GPR19 CE2] and [2.0 GPR19 CE2] and [5.0 GPR19 CE2]: YWHAH,RAB11FIP1,NPEPPSL1,HMGN1,PLIN3,TXN2,RBM39,UBE2M,RCN1
															[0.5 GPR19 CE2] and [1.0 GPR19 CE2] and [2.0 GPR19 CE2] and [5.0 GPR19 CE2]: DIABLO,ETF1,BAG6,NPEPPS,TERF2,MTHFD1,WDR6,RGS10,STRAP,SART3,PSMA3,MRPL12,GFAP
															[0.5 GPR19 CE2] and [1.0 GPR19 CE2] and [2.0 GPR19 CE2] and [5.0 GPR19 CE2] and [10.0 GPR19 CE2]: RAD50,PGM3,TACC3,MDC1,COLGALT1,FARSB,ANP32C,GMPS,SSU72,RANBP3,TPT1,PRPSAP2,RRP9,MGEA5,EEA1,PGP,RTN3,LTA4H,ANP32A,ABCF2,FLNB,ATIC,KIAA1524,NHP2,EIF4A1,NUDT5,RPS10,ERH,DBN1,IMMT,BRD2,NDUFS6,TIMM9,MINOS1,GLS,CD63,RBM34,THOC5,SETBP1,TJP1,CBX1
															[0.5 GPR19 CE2] and [1.0 GPR19 CE2]: REXO4,HDAC2,GPI,CTPS2,OSBP,EEF1D,TBCB,USP5,TXNDC17,AK1,CHD5,KIF5B,TRAX,DISC1,TSNAX,PAFAH1B1,RFC2,PYGL,HN1L,MYH10,QARS,CPSF3,STIP1,PHB,PTMA,MRPS6,GLG1,SRP19,CCAR1,ZNF326,UQCR10,RBM14,VTA1,MAGED2,RAP2A,RAP2B,RAP2C,PDCD5,CD81,PDE12,SYNCRIP,ASPH,MCM4,MT1G,MT-CO2,ATP6V0C,MRPL45,TPX2,COX6A1
															[0.5 GPR19 CE2] and [2.0 GPR19 CE2]: SMNDC1,TUBB3,GLOD4,NAP1L4,EIF4G3,RPL3L,CNN3,LDHA,TUBA1B,RBMXL3,CIAPIN1,GPATCH4,DARS,SLC25A12,AGK,DES,PRPH,VDAC3,CIRBP,PDHA1,H2AFZ,SURF4,USP34,LMNA
															[0.5 GPR19 CE2] and [1.0 GPR19 CE2] and [2.0 GPR19 CE2]: CSDE1,PSMA2,PSMA4,PRMT1,GSTP1,PSME3,SMC1A,CHRAC1,ACAA1,SLC25A1,SLC25A3
															[0.5 GPR19 CE2] and [1.0 GPR19 CE2] and [2.0 GPR19 CE2] and [10.0 GPR19 CE2]: GRB2,HN1,MSH6,ATF1,CREB1,CREM,DBNL,RRM1,IMPDH2,ARHGDIA,UCK2,NASP,EIF5,EIF3H,ATAD3A,FAM136A,SAMM50,TOMM22,VDAC2,CKMT1A,CKMT1B,CKMT2,DLST,ATP1A1,VDAC1,TOMM40,TSPAN6
															[0.5 GPR19 CE2] and [1.0 GPR19 CE2] and [10.0 GPR19 CE2]: DDX19A,WDR3,TOP2B,NUP50,PFKP,HAT1,BLVRB,NAE1,RGPD1,MCM3,MSH2,PSMD2,MLLT4,TCOF1,PPA2,CBS,SLC25A11,RPL10,COX7A2L,COX7A2,RRP12,RBM17,CMC2,UQCRB,ATP6AP2,YLPM1,NEFL,NEFH,DNAJC11
															[0.5 GPR19 CE2] and [1.0 GPR19 CE2] and [5.0 GPR19 CE2] and [10.0 GPR19 CE2]: PDAP1,RPS24,NAA10,KRI1,CCDC6,COPS4,CUL4B,BLVRA,ESD,ASNS,CAD,DBI,GLO1,TRMT6,ADSL,TMSB10,EIF3B,CPNE3,ARL3,GNG5,JAGN1,PRPF40A,PHB2,CYC1,PNN,CS,RNF2,ATPIF1,HBA1,YY2,HBA2,NEFM,MRPS18B,YY1,MGST3,SLC25A24
															[1.0 GPR19 CE2] and [5.0 GPR19 CE2] and [10.0 GPR19 CE2]: CLGN,NSF,CHCHD4,SUPT5H,HNRNPUL2-BSCL2,RALY,HMGCS1,ILF3,EIF3K,EIF3G,SNRPD2,GAA,SUMO3,P3H1,LEPRE1,COASY,RPL31,PPIH,HADHB,PELP1,NIN,HK1,ARF4,RPS11,REXO2,C11orf98,MPP6,DDX54,RPL28,PCBP2,SDAD1,SUCLG1,SAR1B,PLAA,LDHC,MARCKS,SRPK3,CUL3,DHCR7,SUGP2,AKAP12,CHMP1A,RPL36A,TRUB1,LAMP1,RPL37A,MMS19,ATXN2,POR,GIPC1,GSTM2,GSTM5,DPP9,OXCT1,SEC61A1,ATP5D,E…
															[1.0 GPR19 CE2] and [10.0 GPR19 CE2]: AP1M2,RPS19,SRCAP,PAK1,ANXA6,H2AFX,IKBKAP,TBCE,EMG1,RGPD2,XPO7,RPL18A,CENPV,NNT,RPL9,DDX47,HAX1,PAF1,MAP2K2,MAP1B,GPR180,TROVE2,AMOTL1,TTC19,TPM3,SF3A2,GUK1,AP3B2,C1orf131,DKFZp434B156,WDR92,ARL2BP,DDX4,DNAJB2,DNAJB8,HM13,PPHLN1,MRPS28,CEP41,NCL,WHSC1,WDR18,LSM4,SLC1A5,PLD3,BZW1,EIF4G2,RBMX,SUB1,SNRPC,PPP1R12A,APIP,RBX1
															[0.5 GPR19 CE2] and [5.0 GPR19 CE2] and [10.0 GPR19 CE2]: PIN1,NDUFAF3,PRRC2C,MTDH,DHRS7,H3F3C,KPNB1,EPHA1
															[0.5 GPR19 CE2] and [5.0 GPR19 CE2]: ATAD1,RIF1,DDI2,COQ9,ACAT2,TOP1MT,TBL3,U2SURP,KHDRBS2,CYB5B,OXSM,NOL6,MCM5,RTN1,PTBP1
															[0.5 GPR19 CE2] and [2.0 GPR19 CE2] and [5.0 GPR19 CE2]: LSM14A,STMN4,HSPB1,UBA2,TKT,CCDC124,NAT10,NDUFV1,DDX27,RAB1C,M6PR
															[0.5 GPR19 CE2] and [2.0 GPR19 CE2] and [5.0 GPR19 CE2] and [10.0 GPR19 CE2]: DCTN1,VRK1,ADNP,UQCRQ,CHAMP1
															[5.0 GPR19 CE2] and [10.0 GPR19 CE2]: DDX51,RAB5A,SMN2,SMN1,CDC27,ILK,NDUFS8,XPO5,IGF2BP2,PPME1,MRPS17,CD59,MT-ATP6,ACADM,TMEM230,RBM28,SLC4A1AP,STRBP,DDX39A,HRNR,SPAG9,STARD9,ABHD14B,NELFE,CLNS1A,TIA1,WFS1,CSNK1E,RHOA,RHOC,SUMO2,IPO5,CSTF1,SLC7A5,RAB25,FAM21A,FAM21B,FAM21C,RSL1D1,CNN2,WDR44,AP2B1,RPL23,MAGT1,RPL29,IDH3A,PAWR,EXOC8,LTV1,RPS4X,WNK1,GINS2,YWHAG,PRPF31,GTPBP6,TFIP11,RFC4,ESYT2,CD2BP…
															[0.5 GPR19 CE2] and [10.0 GPR19 CE2]: PSIP1,TNPO2,RPIA,DNAJC8,NCAPH,IWS1,POLR2A,ERCC6L,NPLOC4,TPM4,NUP153,NANS,ESF1,TARDBP,ATP5SL,SLC25A31,ERAL1,RRP8,COX15,HNRNPL,TOMM20,RCN2,POLDIP3
															[0.5 GPR19 CE2] and [2.0 GPR19 CE2] and [10.0 GPR19 CE2]: NMT1,ACTBL2,ANAPC7,TUBA1A,TCERG1,MRPL48,COX6C,SAP18
															[0.5 GPR19 CE2] and [1.0 GPR19 CE2] and [5.0 GPR19 CE2]: AHSA1,GSTO1,PFKL,PSMC3,CUL4A,SMS,PFDN2,PHPT1,FERMT2,MTA1,LMAN2,TAF15,NDUFV2,NOLC1,UQCRH,DDX18,EIF3F,H3F3B,H3F3A,SAFB,LMNB2,HDGFRP2
															[0.5 GPR19 CE2]: TXNDC12,STX18,WIZ,TOX4,DDX52,FDFT1,RIC8A,PDE9A,FAM21D,RNF14,C5orf24,FLII,CCDC47,ALCAM,RPLP0,NIFK,TES,KIAA1033,ANP32B,MDH1,NUCKS1,PSMD14,METAP1,SRRM2,G3BP1,RNH1,POLR2F,COTL1,TUBB4B,TAGLN3,POLR1B,RBM12,CUL1,NDUFB10,HSPA13,CAMSAP3,SLC25A13,SLC25A6,ACTN4,SEC24C,MTX2,NOP58,NDUFA4,CCDC88A,MMAB,CGGBP1,PDCD11,GATAD2A,UBE2O,COMMD6,CAMK2D,FANCI,INIP,LPCAT1,RABL6,NFKBIL1,SYNJ2BP,NDUFAF2,KHD…
															[1.0 GPR19 CE2]: ADH5,TMEM180,SMC2,PSMD6,PSMC5,TSN,LRRC47,RPS10P5,PSMA6,ZNF638,ERLIN2,PRSS1,PRSS2,PRSS3P2,BOP1,DIEXF,MCCC2,ERO1L,TECR,SUCLG2,PAK1IP1,CSTF3,COX5B,NDUFS1,GHITM,GPT2,MIA3,COX4I1,ALDH5A1,ATP6V1B1,LAMP2,SLC33A1,TIMM10B,SYNJ2BP-COX16,SSR1,ATP5J,ELAVL1,MRPS7,NUP93,PPM1A,PPM1B,TMA16,TALDO1,CCDC43,U2AF1,LRBA,RBM19,PSMC6,GARS,PEF1,TPT1P8,COPS3,GEMIN4,ARID1A,THOC2,BCKDHA,TMEM9,TMEM9B,CD99,MT…
															[2.0 GPR19 CE2]: TUBB4A,TFCP2,UBP1,LDHAL6B,TUBA1C,HIST2H3A,PRDX4,QKI,TUBA4A,PRPF4B,DYNLRB2,BAZ1B,HNRNPUL1,CSNK2A1,LARP1,PRMT8,SNRNP200,RPS16,UBBP4,PSMA8,ZC3H13,SETDB1,DHX36,DDX39B,ARPC5L,CBX8,PPP2R1B,SGTA,CARHSP1,DTYMK,EIF2A,UBE2D3,POTEKP,NACA,HINT1,EEF1A1,HSPA9,PPP2R1A,ALDOC,EIF5AL1,TIAL1,ACTA1,ACTC1,PDCD6IP,POLA2,DCP1A,PDS5B,P4HB,NDUFS3,ACTG1,RPN2,TUBB,HSPE1,TUBA3E,CKB,GTF3C1,POLR1A,TRIM28,ZNF2…
															[5.0 GPR19 CE2]: RAB35,AHI1,MAGOHB,BAG2,CLN6,DKFZp586I031,DSG1,STUB1,ROCK2,TOM1,PPIE,SCRN1,APEX1,AASDHPPT,MCL1,ATP2A3,PRKAG1,SERPINH1,PPP1CB,APOBEC3C,MORF4L2,HLA-B,HLA-C,POLR2E,RPE,PRPF3,EIF3I,TPD52,ACTN1,PSMD12,MRI1,CCT3,CBR4,KTI12,SLC7A1,CDK12,NUFIP2,ANXA7,GALK1,RPL35A,PARK7,UHRF1,TNPO1,TXNL1,ACTR3,PRRC2A,GBAS,HOXB9,MCM2,HSPH1,FIP1L1,LUC7L,CHD3,FAM98A,ME2,EARS2,MAD1L1,POLR1C,GCN1L1,ALDH1L2,CORO…
															[10.0 GPR19 CE2]: FLNA,DAP,CDV3,PAK2,RNF40,ZNF346,ELMOD2,AKAP8,PHKA1,MAP1S,OMA1,SREK1,ACADVL,CFL1,VEZF1,MYO1B,SMARCB1,UBE2N,HNRNPD,HMG20B,UAP1,C3orf17,DHFR,CHORDC1,DCTPP1,GOLIM4,SEPT2,LRPAP1,DDX23,TCEA1,GDI2,EIF2B2,NEDD8,KIF4A,APEH,FXR1,PRKDC,DNAH17,FXR2,WIBG,TRMT112,AGPAT9,CKS1B,PRPSAP1,FBL,ATP6V1A,PKLR,DNAJC9,AP1B1,UQCRC2,LMNB1,GALNT2,DNTTIP2,RNPS1,PYCR1,CWC15,SPG20,EXOSC9,HCFC1,MYBBP1A,CSTF2,F…
															[1.0 GPR19 CE2] and [2.0 GPR19 CE2]: DDB1,FKBP1A,TBRG4,CIRH1A,VBP1,UQCRFS1,CYB5A,CPD,EPS15L1,CEBPZ,HMGA2,TMEM261,OGT,BRD4,RFC5,HMOX1,NDRG3,ZMYND8,POLB
