# Supplementary material for: GPR19 Coordinates Multiple Molecular Aspects of Stress Responses Associated with the Aging Process
Source: Int J Mol Sci. 2023 May 9;24(10):8499. doi: 10.3390/ijms24108499 (PMC10218176; doi:10.3390/ijms24108499)
Supplement: Supplementary file 1 [file ijms-24-08499-s001.zip › Data-Supplement-Maudsley-et-al-2023-Table-S10.xlsx]

## Sheet: Table S10
		Data Supplement													Table S10. Venn diagram separation of the differentially expressed nucleus/large organelle proteins from various GPR19 expression levels (0.5, 1, 2, 5, 10mg).
		GPR19 coordinates multiple molecular aspects of stress responses associated with the aging process
		Stuart Maudsley 1*, Claudia Schrauwen1, İrem Harputluoğlu1, Deborah Walter1, Hanne Leysen1, Patricia McDonald2
		1	Receptor Biology Lab, Department of Biomedical Science, University of Antwerp.
		2	H. Lee Moffitt Cancer Center, Tampa, FL, USA
		* Corresponding Author: Prof. Stuart Maudsley – stuartmaudsley@uantwerpen.be: receptorbiologylab@gmail.com
															[1.0 GPR19 CE3] and [2.0 GPR19 CE3] and [10.0 GPR19 CE3]: WDR5,MYL12A,MYL6B,ARF4,MRPS2,EIF3K,RAB1B,ACSS1
															[2.0 GPR19 CE3] and [10.0 GPR19 CE3]: CCDC51,HMGB1,BZW1,HEATR6,PTRH2,LTF,PGM2,NUDT19,C4orf27,NDUFA2
															[1.0 GPR19 CE3] and [2.0 GPR19 CE3] and [5.0 GPR19 CE3] and [10.0 GPR19 CE3]: TMED10,NUCKS1,MRPS7,FANCI,DDA1,ARF3,BRD2,TPP2,TMEM43,SRM,H3F3A,TMEM180
															[2.0 GPR19 CE3] and [5.0 GPR19 CE3] and [10.0 GPR19 CE3]: HMOX2,SNX27,RGPD8,TIMM13,RBBP4,ACSL3,RPS2,WBP2,PNP,MTCH1,MRPS28,HYPK,TTC19,PRPSAP2,ACADM,COASY,HSPB1
															[2.0 GPR19 CE3] and [5.0 GPR19 CE3]: SDF2L1,ZC3H15,DNMT1,ALDH3A2,HSD17B4,RPS6,CHP1,GOLGB1,PSPC1,ENAH,KCTD5,EXD2,COPB2,GAPDH,C1orf131,TAF6,RPL19,FBXO22,HACD3,CEP41,MCM5,SCP2,ARF5,TUBB4B,PSMD12,KAT7,DYNC1H1,ARF1,PSMA6,EPHA2,PSMA2,RRS1,EIF3D,RPS23,SNX17,ARG1,PHPT1,IMPDH2,TALDO1,CTU1,HAUS5,MAGOHB
															[1.0 GPR19 CE3] and [5.0 GPR19 CE3]: COX17,AASDHPPT,NDUFV2,PHF10,ENOPH1,ANP32A,RPP30,MYH14,PSMD3,PDXK,TUBA1C,PSMA4,SEC31A,SURF4,IARS,EIF4G2,H3F3C,HIST2H3PS2,C12orf43,IGF2R,TP53,HAX1,HSP90B1,LBR,MAP1B,METAP1,MTA3,UBA52,RPS27L,NPLOC4,DDX4,DBN1
															[1.0 GPR19 CE3] and [2.0 GPR19 CE3] and [5.0 GPR19 CE3]: AKR7A2,ZRANB2,PPP1R12A,EPB41L2,NOLC1,PRPF19,NASP,EIF3L,SRRM2,CDC42,PITRM1,PQBP1,ZFP91,RDX,BTF3,TKT,CTCF,HIST2H3A
															[0.5 GPR19 CE3] and [1.0 GPR19 CE3] and [2.0 GPR19 CE3] and [5.0 GPR19 CE3]: FKBP8,CDC37,NUP205,PABPC1,PSMB1,CAND1,NUDC,IQGAP1,NMT1,PLS3,USP34,SAP18,OPA1,RPS3,COX6B1,DNAJA2,SAE1,PGM3,ERP44,EIF4G1,CS,TLN1,ASF1B,FOXK2,SCRN1,MARS,EPPK1,PRPSAP1
															[0.5 GPR19 CE3] and [1.0 GPR19 CE3] and [2.0 GPR19 CE3] and [5.0 GPR19 CE3] and [10.0 GPR19 CE3]: CCDC47,MCM3,MTHFD1L,CBR1,GATC,CBR3,EIF5,GDI2,NANS,GSTP1,ANXA6,TMCO1,PIN4,LIMA1,PPM1G,SRPK1,SFXN1,CHORDC1,HNRNPUL1,RBM12,FHOD1,SLC25A13,SRI,BASP1,SNRPD1,PDCD5,RALA,HMGB1P1,DENR,TOMM20,ADSL,APEX1,EDF1,ANXA2,ANP32C,NOP10,ILF3,KCTD12,TERF2,DDX42,ARFIP2,FSCN1,GLMN,MDC1,ZMYM3,COPS7B,MGEA5,FAF1,ASNS,BAX,GAB…
															[0.5 GPR19 CE3] and [1.0 GPR19 CE3]: ARHGDIA,MRPL28,NACA,NACAP1,PFDN1,TPM1,MTHFD1,PABPC4,ARPC4,GLA,GTF2B,IGF2BP3,MMTAG2,DKFZp586I031,STIM2,DBT,PRPF31,THOC1,MLLT4,SRP19,CD99,RPL37AP8,PSMC5,EZH2,PRMT5,SRP68,LCP1,STUB1,USP5,CKMT2
															[0.5 GPR19 CE3] and [2.0 GPR19 CE3]: ABCF2,DDX18,SLC25A24,PSMC4,ALDOA,PLAA,STRAP,RPSA,RPSAP58,YME1L1,ACTN1,ATP6V1A,RPL6,TOR1AIP2,SLC25A12,ACTN3,CAPNS1,MRPL48,DNAJC10,UQCRH,COPS4,SRRT,MAPRE1,PLOD2,BCL2L10,MAGED1,TPT1P8,SMARCD1,SLC1A5,SLC7A5,CMTR1,CADM1,POLR3E,CTDSPL2,AK6,TAF9,TAF9B,NCAPH2,STMN1,DVL2,CPT1A,AIMP1,PPP5D1,PPP5C,TARS2,GCN1L1,LARS,RPL26,ALB,ACLY,CYB5B,BMS1,FKBP5,IDH1,HCCS,TRAFD1,PPP6R3,…
															[0.5 GPR19 CE3] and [1.0 GPR19 CE3] and [2.0 GPR19 CE3]: NNT,FHL1,NDUFS2,YWHAH,CPSF6,THOP1,PRPF3,HINT2,GNG5,MORF4L2,HRNR,JAGN1,RRP1,POR,GLG1,CCDC88A,RBBP7,SRFBP1,LIN28B,SF1,NOMO1,H1F0,NFKB1,TCOF1,SRP54,SND1,CANX,EEF1D,CEBPZ,PPP1CB,TIMM8B,GPI,INIP,UBE2D2,EBP,VARS,KARS,RNMTL1
															[0.5 GPR19 CE3] and [1.0 GPR19 CE3] and [2.0 GPR19 CE3] and [10.0 GPR19 CE3]: NUDT5,LYZ,PEBP1,TIMM9,PRDX6,DYNLL1,GNB2L1,ACTR2,SUB1,NSF,ALCAM,MECP2,HMGN2,SUCLG2,NIFK
															[0.5 GPR19 CE3] and [1.0 GPR19 CE3] and [10.0 GPR19 CE3]: AKR1B1,HIST2H2AA3,SOD1,UCHL1,PSMA8,NUP214,PPAN,GFAP,PRPS1
															[0.5 GPR19 CE3] and [1.0 GPR19 CE3] and [5.0 GPR19 CE3] and [10.0 GPR19 CE3]: RANBP1,RPS16,CDKN2A,PFDN2,HN1L,STMN2,LDHA,NIP7,HPRT1,MAT2A,PSMD7,SSBP1,P4HB,RBM22
															[1.0 GPR19 CE3] and [5.0 GPR19 CE3] and [10.0 GPR19 CE3]: TUBB4A,DSG1,RAB6A,RAB6B,GRHPR,OCIAD1,HDAC2,GSTO1,CNBP,NOL11,H2AFY2,CNN3,STT3B,HNRNPM,ATP1A1,TUBA1B,LSM4,TBCA,PRPF8,MRPL45,HDAC3,QRSL1,FMR1,H3F3B,RPL27A
															[1.0 GPR19 CE3] and [10.0 GPR19 CE3]: AFG3L2,ADH5,NDUFS5,PDHA1,NDUFS3,FDXR,WAC,CLPTM1,HNRNPD,XPO1,MRPL22,HMGCS1,WDR43,PSIP1,RPL36,CSNK2A2,HMGN4,GRB2,SRPRB,TAF15,UBR7,EIF4B,RPS15,PLRG1,HIST1H1C,KLF12,KLF3,KLF5,KLF7,MYNN,ZSCAN16,ZSCAN2,RPL37A,VEZF1,CBX1,EPHA1,H2AFX,EEF1E1,KPNB1,HNRNPH1,RPS25
															[0.5 GPR19 CE3] and [5.0 GPR19 CE3] and [10.0 GPR19 CE3]: ZYX,HINT1,ALDH1B1,TNPO1,HMGN5,PSMD2,MTA1,DOCK7,MTX1,APP,TPD52,GBAS,LUC7L,PSMA3,MRPL54,PSMA5,PSMC2,RAB10,GNL3L,CBS,ATP6V1G1,CNPY2,WARS2,SRSF7,EFTUD2,ABCF1,MAZ,RPS24,PBK,LONP1,EEF1B2
															[0.5 GPR19 CE3] and [5.0 GPR19 CE3]: UBA2,DIABLO,RRM1,PRRC2C,ANXA11,SMAP1,RPS11,LAGE3,EPHX1,FAM136A,TTLL12,AP2B1,CHMP2B,PAFAH1B1,GNAI2,TIMM44,IQGAP3,HSP90AA2P,CALR,RPS27,PPA1,PPP4C,DNAJB6,UBE2R2,KCTD8,SF3B2,PPP2R2A,PPP2R2C,NOMO2,ATAD1,INA,PCYOX1,FAHD2A,ECH1,ALDH7A1,YBX3,DKFZp686E0752,FKBP1A,OGFR
															[0.5 GPR19 CE3] and [2.0 GPR19 CE3] and [5.0 GPR19 CE3]: NAP1L4,UQCRQ,PSMD1,CTSD,CPT2,TIMM10B,HDGFRP2,SPTLC1,SRCAP,PACSIN3,KHSRP,FAM192A,NIP30,ERO1L,SNRNP70,SERPINB6,DES,VIM,PRPH,RAE1,APMAP,SNX5,PTPN1,MDN1,RQCD1,RUFY2,CCDC40,AK4,BLVRB,MCCC2,UBR4,NUDT4,AHI1,SEC23B,PRPS2,ARHGEF2,BICD2,RABGGTA,LIMD1,ANKFY1,ARKL1,C18orf25,PUS7,LCMT1,TBC1D10A,DCAF16,BRAT1,MPI,RCCD1,LRBA,UBE4A,CTNNA2
															[0.5 GPR19 CE3] and [2.0 GPR19 CE3] and [5.0 GPR19 CE3] and [10.0 GPR19 CE3]: LTA4H,HIST1H1B,GARS,COX15,CRNKL1,GART,PKN2,CAD,NCBP1,SKP1,CSTB,TDRKH,STARD13,UQCRFS1P1,TMA16,CAP1,SDF4,MPHOSPH6,AP1B1,SAFB,EXOC3L4,CALM1,FAM96B,SCAF4,RBM17,RBM4,RBM26,PGRMC2,PDIA3,SMARCB1,PTRHD1,TXNRD2,ME3,MRPS11,PPP2CB,WDR26,SPC24,ARMC6,M6PR,DCTN1,RDH13,LPCAT1,PDCD4
															[5.0 GPR19 CE3] and [10.0 GPR19 CE3]: SMARCE1,PPA2,HMGN1,UGGT1,HTATSF1,BPTF,C7orf50,IDH3G,ME2,PRMT1,ARL6IP1,PTPN11,ACAT2,MTAP,ANXA7,MGST3,CDK12,RPL36A,DYNLL2,RPS10,ACIN1,SF3B5,MT1X,MT2A,MT1G,UTP18,AP1G1,PDHB,TMEM109,TUBAL3,SNX3,HK1,NDUFAF3,RPS15A,C7orf55-LUC7L2,BABAM1,MCM4,POLR2G,FAM3C,NUP62,SUMO1,WBP11,GHITM,AGPAT9,RABIF,PYCR2,TUBB2B,PPIL1,HMGN3,POLR2E,POLR2F,RSF1,ACTBL2,CTAGE15,CTAGE5,CTAGE6,TE…
															[0.5 GPR19 CE3] and [10.0 GPR19 CE3]: ANXA5,SMC4,IK,POLR2C,HIST1H2AA,COX5A,PGK1,MRPL43,ATP5I,CBX3,DHX16,LDHC,LDHAL6A,BANF1,UTP14A,RABGGTB,RUVBL2,PPT1,ATXN2L,DUSP3,MIA3
															[0.5 GPR19 CE3] and [2.0 GPR19 CE3] and [10.0 GPR19 CE3]: TMEM201,BOLA2B,NEDD8,VPS25,ATXN10,GLRX5,BCAP31,LIG1,MSH6,CNNM3,GLOD4,MMS19,ASMTL,ARPP19
															[0.5 GPR19 CE3] and [1.0 GPR19 CE3] and [5.0 GPR19 CE3]: ETF1,EIF4H,EHD4,ANP32B,DBNL,HSPH1,ALDH2
															[0.5 GPR19 CE3]: ESYT1,DSP,PSAT1,LMAN2,CKB,GLS,EIF1,EIF1B,PPARGC1A,ESD,TUBA8,NDNL2,LSM14A,PRDX1,HN1,TPT1,hCG_1789329,UBE2L3,MTX2,FIP1L1,TOMM22,DNAJB2,NAP1L1,ATP5B,DDOST,TAGLN3,PDE12,DHX33,SDHB,ANP32E,LDHB,UQCRC2,DBI,AGPS,NDUFB9,DYNC1I2,HIBADH,DNAJB1,POLDIP2,APEH,CISD1,PABPN1,MARCKSL1,PPP1R12C,HIST1H2AC,CUL1,TTC9C,DCTPP1,MAPKAPK2,MAPKAPK3,TROVE2,PDCD6,AMPD2,SYNGR1,POLD1,PFN1,VPS36,C10orf71,NOB1,MR…
															[1.0 GPR19 CE3]: HOGA1,PHKA1,ASF1A,OSGEP,SEC62,UBXN1,GEMIN7,PYCR1,HSPA4L,PTGES3L-AARSD1,PDCD2L,PLS1,CHCHD2,CHCHD2P9,FAIM,FAM162A,YARS,PSMD11,CSNK2A3,CSNK2A1,CDK4,ZC3H14,ACAD9,ATP2B1,ATP2B2,ATP2B3,ATP2B4,CDV3,GALNT2,STK24,STK25,RIF1,ACAT1,TPM2,PDCD6IP,MRPS31,TM9SF3,XPC,ETFB,PC,G3BP1,EED,MSH3,TMSB10,DLST,PNO1,CAPN1,C21orf59,MAPK3,ATIC,NABP2,CROCC,COX4I1,GNL3,SNRPD2,RANGAP1,SRSF2,HSP90AA5P,DHX15,RPS…
															[2.0 GPR19 CE3]: LAMC1,TCEB1,CA2,COPB1,POLR2H,DDX6,LIN7A,ILVBL,CIRH1A,MRPL46,TMED9,PRCC,DDX19A,ATG3,PAWR,MED1,NACC1,NACC2,HUWE1,RAB21,RANBP9,UBE2I,CTNNA1,NOL7,NDUFAB1,PTGES2,NEFM,RNF114,HIGD1A,HIGD1C,LCLAT1,DBR1,CCDC58,GIPC1,RPL36AL,ARL1,SUCLG1,IRAK1,VPS26A,PANK4,DCBLD2,GRN,MRRF,PSMB5,SBNO1,CD276,ATPIF1,SCO2,POLR2A,NIPBL,TMEM41B,DIDO1,GK,GK3P,EIF3F,SFN,HNRNPLL,LRRFIP2,STX12,C17orf85,USF1,VBP1,ACA…
															[5.0 GPR19 CE3]: MBD3,C19orf43,HMG20B,CHD1L,NARS,CCDC137,NAE1,ECM29,KIAA0368,MGA,MRPL53,HEATR1,NUP54,PPP1R10,CALM2,VAT1,TJP1,IDI1,PFDN4,TRAX,TUBB8,PRMT8,MTHFD2,TMEM9,PFDN5,CMAS,CCT6B,NCKAP1,AKAP1,SOD2,TUBA4B,ZNF598,NME1,UBAP2,SMEK1,UBE2D3,PFDN6,PITHD1,SMNDC1,IMPA1,DDT,DDTL,TBCD,RAD50,NUCB1,PHF23,EIF3A,C19orf47,SCFD1,WIBG,PTBP3,TSN,CPOX,RAP1A,POM121,POM121C,CHD3,LYPLA2,CELF1,SHMT1,RPL11,EEFSEC,CLN…
															[10.0 GPR19 CE3]: IDH3B,SEPT2,CKM,MDH1,RANBP3,MT1A,MT1H,PARK7,MRPL12,DDX52,RPL18A,LMNA,CKS2,MAP4,LSS,TMF1,COIL,FDX1,MKL1,PRPF38B,NAA50,PHF3,H2AFZ,POLA2,METAP2,C9orf78,FBL,RING1,PMPCB,SYMPK,PLD3,UFD1L,PSMD9,TRUB1,TXNL1,PELO,TRMT1,GPHN,ABHD14B,EIF2A,RBM23,PCBP3,CHAMP1,GDI1,PSMD10,CHMP2A,VTA1,COG4,KHDRBS2,ADNP,IKBKAP,UPF3B,FARSA,SREK1,RAD21,ASNSD1,KRT17,ZBTB33,FASN,ADCK3,DEGS1,PHF5A,USP14,SPCS1,TP53…
															[1.0 GPR19 CE3] and [2.0 GPR19 CE3]: GPS1,NENF,TFG,SOAT1,SLC39A7,STAU2,ATF1,CREB1,CREM,BRD8,SLC19A1,SSU72,SMC6,UBXN4,PRRC2A,CTR9,SEC23A,DNTTIP2,RAVER1,NAA40,PEPD,PSMA1,BCLAF1,IST1,HOXB9,EIF3G,DDX46,GNG12,MYL6,RPL10,STAU1,GOLGA2,RCN2,CPNE1,WDR33,IDH3A,CKAP2,WFS1,CLTA,RBMX,CTCFL,IDH2,TRA2B,PRPF40A,RPL30,RBX1,EIF4A3,NCL,ZC3H7A,ZC3H7B,WARS,IMMT,YY2,UQCRHL,TUBB3
